# Supplementary material for: Long-wavelength photoresponsive gallium zinc oxynitride for efficient oxygen evolution and Z-scheme water splitting reactions
Source: Royal Society of Chemistry journal article supplement (doi:10.1039/d4ta03576c), 2024-01-01
Supplement: d4ta03576c1.xlsx [file d4ta03576c1.xlsx]

## Sheet: Figure 1_A
		Intensity / a.u.
	2θ/deg	a	b	c	d
	10	1000	783.333	783.333	833.333
	10.01	1150	750	816.667	966.667
	10.02	1000	1000	833.333	833.333
	10.03	900	866.667	750	866.667
	10.04	900	716.667	683.333	833.333
	10.05	1050	900	650	716.667
	10.06	900	966.667	616.667	716.667
	10.07	983.333	983.333	983.333	833.333
	10.08	933.333	983.333	983.333	933.333
	10.09	933.333	1050	766.667	900
	10.1	1050	833.333	733.333	800
	10.11	1233.33	650	733.333	866.667
	10.12	1100	950	800	900
	10.13	900	833.333	733.333	916.667
	10.14	833.333	650	800	800
	10.15	700	800	883.333	800
	10.16	883.333	800	866.667	733.333
	10.17	1033.33	883.333	916.667	700
	10.18	1033.33	733.333	983.333	700
	10.19	1066.67	800	800	700
	10.2	1033.33	816.667	700	616.667
	10.21	950	700	766.667	516.667
	10.22	1000	700	816.667	516.667
	10.23	966.667	800	800	700
	10.24	916.667	816.667	733.333	850
	10.25	816.667	1000	816.667	816.667
	10.26	883.333	883.333	733.333	933.333
	10.27	1300	783.333	916.667	966.667
	10.28	1250	816.667	750	783.333
	10.29	966.667	900	733.333	666.667
	10.3	1150	1000	700	600
	10.31	1050	933.333	733.333	933.333
	10.32	816.667	900	700	1050
	10.33	866.667	900	716.667	716.667
	10.34	1050	783.333	783.333	716.667
	10.35	1050	966.667	783.333	666.667
	10.36	1083.33	1083.33	783.333	850
	10.37	1083.33	816.667	716.667	966.667
	10.38	1016.67	716.667	716.667	900
	10.39	983.333	783.333	783.333	816.667
	10.4	1083.33	900	816.667	633.333
	10.41	866.667	866.667	716.667	1016.67
	10.42	900	1016.67	650	1016.67
	10.43	1100	983.333	783.333	900
	10.44	1050	833.333	650	783.333
	10.45	950	750	800	633.333
	10.46	1100	866.667	866.667	750
	10.47	1066.67	866.667	833.333	716.667
	10.48	983.333	950	800	800
	10.49	1066.67	800	916.667	1066.67
	10.5	1133.33	750	883.333	916.667
	10.51	1333.33	733.333	766.667	1033.33
	10.52	1366.67	833.333	916.667	866.667
	10.53	1183.33	733.333	850	733.333
	10.54	1000	733.333	800	733.333
	10.55	850	733.333	883.333	733.333
	10.56	1000	850	966.667	683.333
	10.57	1150	883.333	833.333	733.333
	10.58	1150	766.667	733.333	800
	10.59	1000	766.667	800	850
	10.6	1050	933.333	933.333	766.667
	10.61	1116.67	1050	966.667	766.667
	10.62	1050	1000	933.333	916.667
	10.63	966.667	883.333	850	1000
	10.64	1116.67	816.667	700	900
	10.65	1016.67	816.667	733.333	900
	10.66	966.667	733.333	816.667	766.667
	10.67	966.667	700	666.667	850
	10.68	1083.33	766.667	700	1000
	10.69	1200	816.667	816.667	866.667
	10.7	1050	866.667	816.667	733.333
	10.71	816.667	900	983.333	850
	10.72	966.667	850	783.333	783.333
	10.73	1100	816.667	700	733.333
	10.74	1183.33	900	700	666.667
	10.75	1250	833.333	750	750
	10.76	1383.33	983.333	900	783.333
	10.77	1250	1100	816.667	783.333
	10.78	1216.67	950	700	816.667
	10.79	1066.67	916.667	833.333	750
	10.8	1133.33	866.667	866.667	600
	10.81	1066.67	950	750	716.667
	10.82	1216.67	900	866.667	866.667
	10.83	1233.33	1033.33	1000	750
	10.84	1266.67	1000	883.333	883.333
	10.85	1350	866.667	866.667	1033.33
	10.86	1266.67	983.333	916.667	950
	10.87	950	1083.33	883.333	1283.33
	10.88	1116.67	966.667	750	1166.67
	10.89	1083.33	833.333	683.333	866.667
	10.9	916.667	716.667	766.667	766.667
	10.91	1000	1050	750	716.667
	10.92	1083.33	1133.33	1033.33	933.333
	10.93	1133.33	1033.33	766.667	850
	10.94	1200	1033.33	800	800
	10.95	1283.33	1116.67	716.667	850
	10.96	1283.33	1000	650	883.333
	10.97	1100	1016.67	600	850
	10.98	900	1166.67	733.333	733.333
	10.99	1016.67	933.333	883.333	800
	11	1050	933.333	800	816.667
	11.01	1016.67	1083.33	566.667	766.667
	11.02	1100	1183.33	733.333	733.333
	11.03	1433.33	1100	700	883.333
	11.04	1350	1050	650	850
	11.05	1133.33	1050	1050	733.333
	11.06	1016.67	900	983.333	733.333
	11.07	1150	1016.67	900	950
	11.08	1033.33	933.333	816.667	1016.67
	11.09	1183.33	1116.67	900	900
	11.1	1233.33	750	750	733.333
	11.11	1316.67	866.667	783.333	750
	11.12	1200	783.333	900	950
	11.13	1283.33	866.667	900	950
	11.14	1433.33	950	783.333	833.333
	11.15	1283.33	1066.67	783.333	900
	11.16	1116.67	1000	666.667	900
	11.17	1416.67	1066.67	816.667	916.667
	11.18	1166.67	950	900	1033.33
	11.19	1450	1116.67	1000	916.667
	11.2	1416.67	1033.33	966.667	833.333
	11.21	1383.33	866.667	950	866.667
	11.22	1416.67	1000	833.333	833.333
	11.23	1450	1083.33	833.333	800
	11.24	1333.33	1216.67	966.667	800
	11.25	1350	1100	1083.33	716.667
	11.26	1266.67	966.667	966.667	850
	11.27	1350	1266.67	833.333	766.667
	11.28	1300	1250	766.667	1050
	11.29	1300	1316.67	933.333	1000
	11.3	1300	1150	750	933.333
	11.31	1233.33	1150	833.333	916.667
	11.32	1433.33	1133.33	716.667	933.333
	11.33	1316.67	1233.33	850	933.333
	11.34	1283.33	1283.33	800	1050
	11.35	1400	1183.33	1016.67	1016.67
	11.36	1650	1116.67	1100	1066.67
	11.37	1266.67	1100	1033.33	1183.33
	11.38	1233.33	983.333	800	1100
	11.39	1316.67	1150	716.667	1016.67
	11.4	1250	1283.33	816.667	1066.67
	11.41	1366.67	1316.67	933.333	1033.33
	11.42	1450	1283.33	850	1066.67
	11.43	1466.67	1233.33	900	1166.67
	11.44	1583.33	1233.33	1000	1066.67
	11.45	1450	1216.67	950	1033.33
	11.46	1383.33	1466.67	900	1166.67
	11.47	1416.67	1300	850	1133.33
	11.48	1500	1433.33	816.667	1500
	11.49	1683.33	1500	816.667	1266.67
	11.5	1333.33	1216.67	983.333	1133.33
	11.51	1383.33	1250	1183.33	1133.33
	11.52	1650	1466.67	1050	1116.67
	11.53	1316.67	1250	1133.33	1266.67
	11.54	1316.67	1250	1100	1133.33
	11.55	1533.33	1566.67	1033.33	1183.33
	11.56	1666.67	1516.67	950	1216.67
	11.57	1650	1783.33	733.333	1100
	11.58	1566.67	1300	833.333	1183.33
	11.59	1283.33	1583.33	883.333	1566.67
	11.6	1150	1500	916.667	1450
	11.61	1450	1366.67	916.667	1233.33
	11.62	1366.67	1450	916.667	1316.67
	11.63	1266.67	1316.67	883.333	1333.33
	11.64	1233.33	1183.33	750	1233.33
	11.65	1466.67	1250	800	1316.67
	11.66	1500	1183.33	983.333	1316.67
	11.67	1316.67	1033.33	1016.67	1250
	11.68	1250	1166.67	933.333	1200
	11.69	1233.33	1233.33	1100	1200
	11.7	1333.33	1200	1233.33	1100
	11.71	1550	1333.33	983.333	1083.33
	11.72	1250	1283.33	983.333	1083.33
	11.73	1383.33	950	1066.67	1116.67
	11.74	1516.67	1083.33	983.333	1133.33
	11.75	1166.67	1083.33	883.333	1033.33
	11.76	1166.67	866.667	816.667	1200
	11.77	1116.67	716.667	716.667	1066.67
	11.78	1033.33	950	766.667	950
	11.79	1083.33	1133.33	950	1033.33
	11.8	1183.33	1050	900	866.667
	11.81	1166.67	1166.67	800	816.667
	11.82	1233.33	1216.67	666.667	850
	11.83	1316.67	1133.33	683.333	850
	11.84	950	1183.33	766.667	950
	11.85	916.667	1133.33	716.667	1000
	11.86	1100	966.667	766.667	866.667
	11.87	966.667	1016.67	783.333	766.667
	11.88	866.667	916.667	783.333	650
	11.89	1050	916.667	733.333	766.667
	11.9	1100	1000	966.667	916.667
	11.91	1150	966.667	1050	783.333
	11.92	1116.67	1066.67	916.667	833.333
	11.93	1050	1016.67	783.333	1050
	11.94	1150	1150	916.667	916.667
	11.95	1283.33	1050	933.333	816.667
	11.96	1116.67	916.667	916.667	783.333
	11.97	983.333	883.333	866.667	883.333
	11.98	1016.67	966.667	783.333	866.667
	11.99	1150	966.667	800	750
	12	1116.67	916.667	750	833.333
	12.01	1016.67	800	733.333	933.333
	12.02	1066.67	983.333	833.333	1116.67
	12.03	1016.67	933.333	800	1066.67
	12.04	1116.67	1066.67	900	983.333
	12.05	1083.33	983.333	983.333	933.333
	12.06	1033.33	1066.67	850	883.333
	12.07	1000	1033.33	900	933.333
	12.08	983.333	850	1000	883.333
	12.09	1116.67	900	933.333	800
	12.1	1166.67	816.667	983.333	883.333
	12.11	1083.33	883.333	1050	1133.33
	12.12	1033.33	983.333	1050	983.333
	12.13	1100	900	1033.33	866.667
	12.14	1133.33	766.667	866.667	766.667
	12.15	1050	800	766.667	800
	12.16	816.667	716.667	866.667	950
	12.17	816.667	766.667	966.667	1083.33
	12.18	900	816.667	900	1000
	12.19	1016.67	733.333	800	850
	12.2	966.667	866.667	683.333	766.667
	12.21	1050	866.667	733.333	916.667
	12.22	950	950	850	816.667
	12.23	816.667	1000	966.667	766.667
	12.24	866.667	916.667	866.667	783.333
	12.25	1016.67	883.333	1000	866.667
	12.26	1150	866.667	883.333	816.667
	12.27	1100	816.667	833.333	883.333
	12.28	866.667	883.333	916.667	966.667
	12.29	933.333	983.333	833.333	866.667
	12.3	1183.33	933.333	833.333	716.667
	12.31	1066.67	683.333	633.333	733.333
	12.32	966.667	816.667	533.333	716.667
	12.33	1033.33	983.333	650	766.667
	12.34	1066.67	1116.67	750	833.333
	12.35	1133.33	916.667	700	733.333
	12.36	883.333	850	900	783.333
	12.37	800	850	1000	983.333
	12.38	883.333	933.333	1000	883.333
	12.39	1133.33	1183.33	1050	783.333
	12.4	1233.33	1033.33	833.333	933.333
	12.41	1133.33	883.333	950	783.333
	12.42	1183.33	650	783.333	850
	12.43	1050	783.333	783.333	933.333
	12.44	1033.33	783.333	783.333	933.333
	12.45	1133.33	883.333	883.333	1050
	12.46	1133.33	983.333	950	883.333
	12.47	1200	900	900	900
	12.48	1250	966.667	916.667	800
	12.49	1250	916.667	950	700
	12.5	1100	800	900	916.667
	12.51	866.667	766.667	1000	900
	12.52	950	800	916.667	850
	12.53	1000	1000	916.667	916.667
	12.54	1366.67	1216.67	1200	850
	12.55	1483.33	1100	1016.67	1050
	12.56	1366.67	766.667	750	950
	12.57	1166.67	1016.67	700	1016.67
	12.58	1216.67	1283.33	850	1066.67
	12.59	1283.33	1133.33	916.667	800
	12.6	1166.67	1033.33	933.333	866.667
	12.61	1166.67	983.333	866.667	983.333
	12.62	1066.67	1116.67	700	983.333
	12.63	1033.33	1283.33	716.667	1033.33
	12.64	1033.33	1350	783.333	1133.33
	12.65	1116.67	1533.33	733.333	933.333
	12.66	1033.33	1633.33	866.667	866.667
	12.67	1200	1450	966.667	1050
	12.68	1333.33	1450	883.333	1083.33
	12.69	1083.33	1516.67	883.333	1000
	12.7	900	1300	983.333	900
	12.71	1133.33	1100	933.333	866.667
	12.72	1150	1150	816.667	1083.33
	12.73	1000	1083.33	716.667	1100
	12.74	1133.33	983.333	633.333	950
	12.75	1000	1033.33	850	983.333
	12.76	833.333	1033.33	1000	883.333
	12.77	1116.67	1100	833.333	733.333
	12.78	1016.67	1050	700	683.333
	12.79	933.333	750	750	1000
	12.8	1050	800	800	800
	12.81	783.333	850	916.667	733.333
	12.82	900	700	783.333	833.333
	12.83	1183.33	650	833.333	866.667
	12.84	1183.33	750	833.333	800
	12.85	1100	800	850	816.667
	12.86	1000	750	866.667	750
	12.87	900	866.667	700	750
	12.88	866.667	866.667	750	900
	12.89	900	800	750	900
	12.9	866.667	900	600	900
	12.91	866.667	850	650	1033.33
	12.92	933.333	766.667	800	933.333
	12.93	916.667	916.667	750	750
	12.94	916.667	1033.33	766.667	650
	12.95	983.333	966.667	800	750
	12.96	1083.33	800	883.333	850
	12.97	1133.33	833.333	983.333	766.667
	12.98	1266.67	866.667	816.667	800
	12.99	1200	866.667	966.667	883.333
	13	1216.67	750	1000	883.333
	13.01	1050	700	983.333	1000
	13.02	1050	716.667	933.333	1050
	13.03	933.333	833.333	866.667	983.333
	13.04	1083.33	883.333	916.667	883.333
	13.05	1033.33	833.333	833.333	983.333
	13.06	833.333	816.667	733.333	933.333
	13.07	766.667	783.333	833.333	883.333
	13.08	883.333	850	816.667	1000
	13.09	950	733.333	833.333	950
	13.1	816.667	816.667	900	883.333
	13.11	783.333	850	850	933.333
	13.12	966.667	950	733.333	950
	13.13	966.667	966.667	783.333	883.333
	13.14	1050	1133.33	1000	883.333
	13.15	1066.67	966.667	1000	1000
	13.16	1000	800	883.333	916.667
	13.17	966.667	783.333	900	916.667
	13.18	1083.33	883.333	733.333	833.333
	13.19	1133.33	866.667	716.667	783.333
	13.2	966.667	866.667	866.667	916.667
	13.21	1033.33	1033.33	833.333	1016.67
	13.22	983.333	966.667	983.333	916.667
	13.23	816.667	850	1033.33	1066.67
	13.24	916.667	900	916.667	783.333
	13.25	1066.67	816.667	866.667	800
	13.26	1016.67	866.667	916.667	900
	13.27	866.667	800	933.333	816.667
	13.28	916.667	800	750	866.667
	13.29	1083.33	933.333	750	933.333
	13.3	1166.67	916.667	816.667	916.667
	13.31	1116.67	866.667	916.667	766.667
	13.32	1033.33	750	850	816.667
	13.33	850	650	766.667	850
	13.34	966.667	600	816.667	766.667
	13.35	1000	833.333	800	716.667
	13.36	866.667	1000	816.667	866.667
	13.37	816.667	983.333	916.667	933.333
	13.38	883.333	883.333	700	750
	13.39	983.333	900	600	716.667
	13.4	1016.67	900	750	866.667
	13.41	983.333	983.333	716.667	1166.67
	13.42	1000	1016.67	766.667	1066.67
	13.43	883.333	766.667	783.333	900
	13.44	950	666.667	750	1050
	13.45	816.667	783.333	766.667	1016.67
	13.46	933.333	950	633.333	733.333
	13.47	883.333	1016.67	700	850
	13.48	1083.33	900	950	900
	13.49	950	716.667	950	950
	13.5	1033.33	716.667	916.667	966.667
	13.51	966.667	833.333	950	966.667
	13.52	1100	900	900	916.667
	13.53	1033.33	966.667	950	833.333
	13.54	916.667	916.667	916.667	783.333
	13.55	1016.67	733.333	866.667	766.667
	13.56	1033.33	716.667	833.333	766.667
	13.57	983.333	766.667	683.333	850
	13.58	1050	800	733.333	983.333
	13.59	1150	783.333	833.333	1016.67
	13.6	1083.33	833.333	850	933.333
	13.61	983.333	816.667	800	916.667
	13.62	1116.67	850	733.333	966.667
	13.63	1050	933.333	666.667	850
	13.64	1183.33	866.667	866.667	933.333
	13.65	1100	883.333	866.667	866.667
	13.66	983.333	816.667	750	866.667
	13.67	1100	883.333	700	916.667
	13.68	950	1066.67	800	850
	13.69	766.667	883.333	750	883.333
	13.7	800	733.333	700	983.333
	13.71	1050	816.667	816.667	850
	13.72	1083.33	983.333	833.333	950
	13.73	1000	1050	833.333	916.667
	13.74	933.333	1000	950	933.333
	13.75	950	900	866.667	866.667
	13.76	816.667	966.667	750	866.667
	13.77	950	966.667	716.667	750
	13.78	1033.33	1000	766.667	833.333
	13.79	1000	933.333	766.667	900
	13.8	1083.33	866.667	866.667	900
	13.81	1000	950	950	783.333
	13.82	1016.67	966.667	833.333	816.667
	13.83	1033.33	833.333	883.333	750
	13.84	1083.33	816.667	950	833.333
	13.85	966.667	816.667	983.333	900
	13.86	1033.33	833.333	916.667	916.667
	13.87	1233.33	900	716.667	833.333
	13.88	1100	883.333	666.667	766.667
	13.89	1116.67	950	766.667	816.667
	13.9	1183.33	1016.67	850	950
	13.91	1250	783.333	866.667	916.667
	13.92	1166.67	766.667	900	800
	13.93	1000	900	900	783.333
	13.94	1000	983.333	783.333	800
	13.95	1116.67	833.333	900	850
	13.96	1000	916.667	966.667	800
	13.97	1033.33	900	916.667	766.667
	13.98	1066.67	666.667	850	800
	13.99	1233.33	666.667	783.333	966.667
	14	1050	683.333	750	783.333
	14.01	1000	816.667	916.667	750
	14.02	1083.33	883.333	916.667	850
	14.03	1133.33	783.333	733.333	733.333
	14.04	916.667	683.333	750	733.333
	14.05	883.333	850	950	666.667
	14.06	1083.33	800	883.333	616.667
	14.07	1000	816.667	983.333	750
	14.08	950	783.333	883.333	900
	14.09	1016.67	733.333	1000	883.333
	14.1	900	800	1016.67	800
	14.11	883.333	766.667	766.667	816.667
	14.12	966.667	933.333	633.333	816.667
	14.13	1133.33	883.333	816.667	816.667
	14.14	1033.33	900	1000	833.333
	14.15	966.667	766.667	950	800
	14.16	1150	800	833.333	816.667
	14.17	1216.67	766.667	866.667	883.333
	14.18	1166.67	883.333	850	983.333
	14.19	1116.67	1033.33	900	916.667
	14.2	1083.33	1016.67	850	883.333
	14.21	916.667	850	883.333	833.333
	14.22	950	833.333	916.667	783.333
	14.23	966.667	950	1033.33	833.333
	14.24	966.667	1050	916.667	1066.67
	14.25	1033.33	1033.33	850	1000
	14.26	1100	966.667	933.333	916.667
	14.27	1000	766.667	1000	850
	14.28	800	650	966.667	916.667
	14.29	933.333	783.333	983.333	983.333
	14.3	1083.33	866.667	966.667	933.333
	14.31	1066.67	833.333	966.667	933.333
	14.32	1066.67	866.667	916.667	983.333
	14.33	1050	1016.67	916.667	950
	14.34	1000	1016.67	800	800
	14.35	1000	950	916.667	833.333
	14.36	950	1000	800	866.667
	14.37	950	816.667	916.667	733.333
	14.38	883.333	766.667	1000	816.667
	14.39	916.667	866.667	916.667	850
	14.4	1016.67	816.667	800	716.667
	14.41	966.667	850	783.333	783.333
	14.42	916.667	966.667	1016.67	966.667
	14.43	966.667	1000	1216.67	950
	14.44	1000	1000	1000	850
	14.45	1033.33	950	800	1016.67
	14.46	1050	883.333	883.333	1116.67
	14.47	933.333	966.667	800	933.333
	14.48	1050	883.333	866.667	833.333
	14.49	1133.33	883.333	900	933.333
	14.5	1083.33	933.333	950	816.667
	14.51	1016.67	883.333	1016.67	800
	14.52	900	750	916.667	916.667
	14.53	883.333	833.333	866.667	1033.33
	14.54	883.333	833.333	1050	1016.67
	14.55	833.333	883.333	1033.33	900
	14.56	916.667	916.667	816.667	850
	14.57	916.667	966.667	733.333	850
	14.58	966.667	900	833.333	883.333
	14.59	1083.33	916.667	833.333	916.667
	14.6	1000	916.667	750	983.333
	14.61	850	883.333	833.333	933.333
	14.62	1000	850	900	916.667
	14.63	1166.67	850	750	1000
	14.64	1083.33	816.667	666.667	900
	14.65	1066.67	833.333	833.333	933.333
	14.66	950	866.667	933.333	900
	14.67	866.667	916.667	833.333	933.333
	14.68	1133.33	666.667	766.667	983.333
	14.69	1133.33	783.333	833.333	716.667
	14.7	1066.67	833.333	833.333	783.333
	14.71	1166.67	766.667	1066.67	866.667
	14.72	1116.67	783.333	1016.67	950
	14.73	1100	883.333	1016.67	1016.67
	14.74	1083.33	966.667	916.667	950
	14.75	933.333	950	816.667	883.333
	14.76	1033.33	966.667	866.667	1000
	14.77	1100	933.333	883.333	966.667
	14.78	1183.33	800	900	866.667
	14.79	1100	766.667	800	900
	14.8	966.667	800	666.667	933.333
	14.81	1033.33	966.667	766.667	900
	14.82	1100	1016.67	816.667	866.667
	14.83	1050	900	833.333	933.333
	14.84	1100	833.333	950	983.333
	14.85	1200	883.333	966.667	1066.67
	14.86	1116.67	900	966.667	916.667
	14.87	1150	833.333	1000	833.333
	14.88	1216.67	816.667	833.333	833.333
	14.89	1116.67	966.667	883.333	1050
	14.9	1050	950	900	950
	14.91	1050	816.667	800	833.333
	14.92	1083.33	833.333	800	1016.67
	14.93	983.333	833.333	933.333	850
	14.94	1083.33	883.333	850	816.667
	14.95	933.333	883.333	983.333	1050
	14.96	900	833.333	883.333	1016.67
	14.97	833.333	933.333	900	1150
	14.98	916.667	933.333	950	1033.33
	14.99	1000	933.333	850	1000
	15	1116.67	1033.33	816.667	850
	15.01	1150	1066.67	933.333	733.333
	15.02	1116.67	1016.67	1016.67	750
	15.03	1100	783.333	916.667	766.667
	15.04	1050	833.333	816.667	816.667
	15.05	1033.33	850	766.667	1000
	15.06	1083.33	950	733.333	1016.67
	15.07	1050	1083.33	666.667	1050
	15.08	1166.67	950	800	1000
	15.09	1266.67	750	966.667	933.333
	15.1	1133.33	800	883.333	866.667
	15.11	1033.33	1033.33	883.333	883.333
	15.12	1100	966.667	950	950
	15.13	1216.67	816.667	866.667	1066.67
	15.14	1133.33	666.667	883.333	1116.67
	15.15	1050	666.667	783.333	983.333
	15.16	1083.33	800	666.667	983.333
	15.17	1216.67	866.667	850	900
	15.18	1083.33	733.333	966.667	883.333
	15.19	883.333	716.667	883.333	800
	15.2	850	966.667	800	900
	15.21	950	1033.33	833.333	966.667
	15.22	1000	1000	916.667	900
	15.23	966.667	900	916.667	950
	15.24	966.667	833.333	783.333	883.333
	15.25	966.667	833.333	750	816.667
	15.26	916.667	933.333	733.333	883.333
	15.27	983.333	966.667	983.333	933.333
	15.28	1066.67	933.333	1083.33	1000
	15.29	1100	883.333	966.667	983.333
	15.3	1150	933.333	916.667	850
	15.31	1116.67	1116.67	900	716.667
	15.32	1183.33	983.333	850	800
	15.33	1200	850	750	833.333
	15.34	1216.67	983.333	766.667	850
	15.35	1200	833.333	766.667	900
	15.36	1116.67	750	800	933.333
	15.37	1000	750	1000	933.333
	15.38	933.333	766.667	1016.67	850
	15.39	900	916.667	816.667	833.333
	15.4	1000	1050	766.667	1000
	15.41	883.333	1066.67	850	966.667
	15.42	933.333	1066.67	866.667	950
	15.43	1033.33	966.667	866.667	866.667
	15.44	1116.67	1016.67	950	733.333
	15.45	1116.67	916.667	1016.67	666.667
	15.46	1066.67	866.667	1050	883.333
	15.47	1050	833.333	1066.67	983.333
	15.48	933.333	833.333	950	950
	15.49	883.333	800	866.667	933.333
	15.5	933.333	850	1033.33	866.667
	15.51	1083.33	950	966.667	933.333
	15.52	1133.33	1000	966.667	933.333
	15.53	1150	950	916.667	916.667
	15.54	1150	900	900	1050
	15.55	1083.33	800	816.667	950
	15.56	1083.33	616.667	883.333	1083.33
	15.57	1050	700	1066.67	1083.33
	15.58	1000	816.667	916.667	983.333
	15.59	900	1000	1000	983.333
	15.6	883.333	966.667	1016.67	966.667
	15.61	1066.67	933.333	833.333	883.333
	15.62	1116.67	1000	866.667	933.333
	15.63	1066.67	916.667	883.333	966.667
	15.64	1050	816.667	883.333	883.333
	15.65	1083.33	933.333	783.333	883.333
	15.66	1000	983.333	883.333	1033.33
	15.67	1133.33	916.667	983.333	1050
	15.68	1166.67	800	916.667	1050
	15.69	1050	783.333	750	950
	15.7	1100	783.333	700	816.667
	15.71	1116.67	800	833.333	950
	15.72	1033.33	933.333	966.667	1000
	15.73	1000	1000	966.667	950
	15.74	1050	916.667	800	983.333
	15.75	1033.33	1016.67	833.333	866.667
	15.76	1033.33	1133.33	1016.67	850
	15.77	950	983.333	950	950
	15.78	816.667	1016.67	866.667	1050
	15.79	1100	950	850	883.333
	15.8	1183.33	916.667	766.667	850
	15.81	1183.33	866.667	733.333	933.333
	15.82	1166.67	950	683.333	816.667
	15.83	1116.67	866.667	850	866.667
	15.84	1116.67	883.333	950	866.667
	15.85	1100	1050	983.333	850
	15.86	1083.33	1000	1000	950
	15.87	1066.67	983.333	916.667	1050
	15.88	1066.67	916.667	900	1000
	15.89	1033.33	916.667	883.333	983.333
	15.9	1033.33	900	900	866.667
	15.91	966.667	700	916.667	800
	15.92	983.333	766.667	900	900
	15.93	1100	883.333	900	1050
	15.94	1100	900	1033.33	1083.33
	15.95	1000	866.667	966.667	866.667
	15.96	1116.67	833.333	866.667	866.667
	15.97	1083.33	900	833.333	900
	15.98	1050	950	1000	900
	15.99	1150	900	1000	983.333
	16	1133.33	866.667	866.667	916.667
	16.01	1116.67	783.333	883.333	1033.33
	16.02	1150	816.667	950	1183.33
	16.03	1166.67	833.333	950	1066.67
	16.04	1150	900	966.667	1033.33
	16.05	1116.67	966.667	883.333	950
	16.06	1100	966.667	900	716.667
	16.07	1133.33	950	800	800
	16.08	1050	933.333	800	983.333
	16.09	1066.67	983.333	900	1033.33
	16.1	1000	1100	950	966.667
	16.11	916.667	1033.33	983.333	916.667
	16.12	1066.67	833.333	983.333	966.667
	16.13	1333.33	766.667	916.667	1000
	16.14	1366.67	716.667	866.667	833.333
	16.15	1100	866.667	950	850
	16.16	1100	966.667	1100	883.333
	16.17	1083.33	933.333	1083.33	1050
	16.18	1050	933.333	833.333	1016.67
	16.19	1183.33	950	883.333	1016.67
	16.2	1033.33	966.667	783.333	1033.33
	16.21	1033.33	850	766.667	916.667
	16.22	1016.67	766.667	850	1000
	16.23	1083.33	750	900	1000
	16.24	1116.67	800	883.333	900
	16.25	1166.67	883.333	900	916.667
	16.26	1183.33	833.333	883.333	1000
	16.27	1216.67	783.333	833.333	866.667
	16.28	1166.67	866.667	1000	850
	16.29	1200	916.667	1050	1033.33
	16.3	1233.33	950	1016.67	1133.33
	16.31	1200	1016.67	1000	1000
	16.32	1200	950	950	883.333
	16.33	1183.33	933.333	916.667	866.667
	16.34	1250	916.667	1000	833.333
	16.35	1266.67	816.667	966.667	883.333
	16.36	1300	816.667	816.667	950
	16.37	1083.33	916.667	966.667	1016.67
	16.38	1116.67	933.333	1150	983.333
	16.39	1166.67	966.667	1050	1033.33
	16.4	1150	983.333	966.667	1016.67
	16.41	1183.33	833.333	950	1033.33
	16.42	1116.67	783.333	966.667	966.667
	16.43	1083.33	833.333	900	950
	16.44	1033.33	900	916.667	933.333
	16.45	966.667	966.667	866.667	1016.67
	16.46	933.333	983.333	833.333	1000
	16.47	1100	983.333	916.667	866.667
	16.48	1166.67	833.333	933.333	866.667
	16.49	1066.67	850	883.333	1100
	16.5	900	883.333	966.667	1100
	16.51	900	800	1000	1083.33
	16.52	1066.67	733.333	966.667	1066.67
	16.53	1083.33	850	983.333	1033.33
	16.54	966.667	1016.67	1016.67	883.333
	16.55	950	1050	1016.67	750
	16.56	1116.67	950	950	700
	16.57	1250	900	1000	900
	16.58	1216.67	833.333	1033.33	1150
	16.59	1300	766.667	1050	1066.67
	16.6	1200	816.667	1066.67	1083.33
	16.61	1266.67	933.333	1033.33	1150
	16.62	1283.33	900	933.333	1066.67
	16.63	1183.33	833.333	950	933.333
	16.64	1100	850	1016.67	850
	16.65	1000	900	1000	883.333
	16.66	1050	1016.67	850	950
	16.67	1183.33	933.333	766.667	1016.67
	16.68	1166.67	916.667	883.333	1016.67
	16.69	1116.67	1033.33	916.667	983.333
	16.7	1116.67	1050	900	916.667
	16.71	1100	1016.67	900	933.333
	16.72	1033.33	950	950	1033.33
	16.73	933.333	983.333	983.333	1116.67
	16.74	900	1133.33	983.333	1116.67
	16.75	933.333	1033.33	983.333	1083.33
	16.76	1133.33	983.333	1000	1000
	16.77	1216.67	1050	1150	983.333
	16.78	1116.67	983.333	1066.67	833.333
	16.79	1083.33	916.667	866.667	783.333
	16.8	1100	950	683.333	983.333
	16.81	1133.33	1000	750	1000
	16.82	1250	883.333	916.667	916.667
	16.83	1300	933.333	933.333	933.333
	16.84	1416.67	883.333	1050	1033.33
	16.85	1316.67	933.333	1033.33	1000
	16.86	1266.67	800	933.333	966.667
	16.87	1266.67	850	1016.67	1066.67
	16.88	1033.33	1000	1066.67	1066.67
	16.89	950	983.333	1050	983.333
	16.9	1166.67	950	1050	1016.67
	16.91	1233.33	916.667	950	1000
	16.92	1183.33	933.333	900	1000
	16.93	1166.67	983.333	1000	1033.33
	16.94	1216.67	933.333	983.333	966.667
	16.95	1350	850	950	1016.67
	16.96	1383.33	900	1016.67	1033.33
	16.97	1266.67	916.667	933.333	933.333
	16.98	1300	866.667	766.667	966.667
	16.99	1283.33	866.667	850	950
	17	1283.33	850	850	1050
	17.01	1250	916.667	783.333	1100
	17.02	1150	950	833.333	1250
	17.03	1133.33	950	916.667	1100
	17.04	1033.33	933.333	883.333	966.667
	17.05	1100	1033.33	933.333	950
	17.06	1116.67	1050	1000	966.667
	17.07	1150	1016.67	900	966.667
	17.08	1100	883.333	833.333	916.667
	17.09	1100	833.333	933.333	1016.67
	17.1	1150	900	1083.33	1133.33
	17.11	1183.33	933.333	1066.67	1133.33
	17.12	1300	1100	966.667	1016.67
	17.13	1300	1100	933.333	1050
	17.14	1216.67	966.667	983.333	1000
	17.15	1216.67	866.667	983.333	916.667
	17.16	1300	800	916.667	983.333
	17.17	1283.33	800	933.333	1000
	17.18	1233.33	916.667	983.333	1150
	17.19	1233.33	916.667	1033.33	1183.33
	17.2	1233.33	833.333	1150	1150
	17.21	1300	866.667	1100	1183.33
	17.22	1366.67	833.333	1000	1116.67
	17.23	1266.67	866.667	916.667	1216.67
	17.24	1216.67	1083.33	966.667	1183.33
	17.25	1216.67	1116.67	983.333	1066.67
	17.26	1216.67	1033.33	933.333	1066.67
	17.27	1133.33	1033.33	983.333	1150
	17.28	1250	1050	1050	1066.67
	17.29	1250	883.333	1033.33	1016.67
	17.3	1083.33	716.667	966.667	1150
	17.31	1116.67	783.333	933.333	1116.67
	17.32	1116.67	883.333	1016.67	1083.33
	17.33	1066.67	983.333	983.333	1116.67
	17.34	1100	1050	1066.67	1100
	17.35	1183.33	933.333	1100	1000
	17.36	1283.33	833.333	1083.33	916.667
	17.37	1283.33	783.333	1050	883.333
	17.38	1233.33	866.667	916.667	933.333
	17.39	1183.33	950	916.667	933.333
	17.4	1116.67	966.667	1033.33	966.667
	17.41	1133.33	883.333	1016.67	1000
	17.42	1233.33	883.333	933.333	983.333
	17.43	1283.33	966.667	983.333	966.667
	17.44	1300	900	1016.67	1100
	17.45	1283.33	816.667	1000	1200
	17.46	1283.33	966.667	1066.67	1033.33
	17.47	1366.67	1083.33	1066.67	983.333
	17.48	1183.33	1033.33	983.333	966.667
	17.49	1166.67	950	933.333	933.333
	17.5	1266.67	983.333	983.333	1050
	17.51	1183.33	966.667	1033.33	1033.33
	17.52	1050	1000	1100	966.667
	17.53	1116.67	1016.67	1133.33	933.333
	17.54	1183.33	1066.67	1050	983.333
	17.55	1266.67	1083.33	1066.67	1000
	17.56	1233.33	1100	1100	950
	17.57	1183.33	1083.33	1050	916.667
	17.58	1166.67	1016.67	1000	916.667
	17.59	1116.67	1000	900	916.667
	17.6	1183.33	900	833.333	900
	17.61	1250	983.333	883.333	866.667
	17.62	1216.67	1000	933.333	883.333
	17.63	1216.67	983.333	983.333	900
	17.64	1200	1016.67	1000	950
	17.65	1283.33	983.333	916.667	1016.67
	17.66	1116.67	1016.67	950	1083.33
	17.67	1133.33	933.333	1033.33	966.667
	17.68	1183.33	883.333	1000	950
	17.69	1300	1000	1000	1000
	17.7	1316.67	1000	1050	1000
	17.71	1266.67	883.333	1116.67	1016.67
	17.72	1200	883.333	1200	1016.67
	17.73	1233.33	900	1183.33	1066.67
	17.74	1366.67	916.667	1033.33	1033.33
	17.75	1366.67	966.667	966.667	983.333
	17.76	1216.67	1083.33	1100	1050
	17.77	1233.33	1100	1083.33	1100
	17.78	1250	983.333	1000	1116.67
	17.79	1133.33	1016.67	983.333	1150
	17.8	1150	1083.33	1083.33	1150
	17.81	1233.33	933.333	1150	1166.67
	17.82	1316.67	933.333	1116.67	1150
	17.83	1383.33	983.333	1033.33	1016.67
	17.84	1283.33	1133.33	1016.67	966.667
	17.85	1150	1150	1150	933.333
	17.86	1150	1083.33	1150	1033.33
	17.87	1183.33	1133.33	1116.67	1250
	17.88	1300	1250	1133.33	1166.67
	17.89	1433.33	1116.67	1166.67	1066.67
	17.9	1283.33	916.667	1116.67	1033.33
	17.91	1133.33	983.333	1016.67	1100
	17.92	1266.67	1033.33	950	1050
	17.93	1266.67	966.667	883.333	1066.67
	17.94	1166.67	1016.67	900	1150
	17.95	1183.33	983.333	1066.67	1116.67
	17.96	1300	900	1150	1083.33
	17.97	1333.33	883.333	1200	1066.67
	17.98	1266.67	1016.67	1100	1100
	17.99	1266.67	1116.67	966.667	1066.67
	18	1316.67	1033.33	916.667	1050
	18.01	1200	966.667	983.333	1100
	18.02	983.333	933.333	1200	1116.67
	18.03	966.667	950	1400	1133.33
	18.04	1116.67	1033.33	1300	1133.33
	18.05	1183.33	1100	1100	1133.33
	18.06	1300	1116.67	1066.67	1066.67
	18.07	1433.33	1016.67	1050	1033.33
	18.08	1433.33	1033.33	933.333	1066.67
	18.09	1283.33	1083.33	950	1150
	18.1	1283.33	1016.67	1066.67	1266.67
	18.11	1383.33	1083.33	1083.33	1166.67
	18.12	1216.67	1083.33	1133.33	1066.67
	18.13	1100	983.333	1116.67	1100
	18.14	1300	966.667	1050	1100
	18.15	1350	966.667	1116.67	1066.67
	18.16	1350	1016.67	1166.67	1183.33
	18.17	1400	1116.67	1133.33	1133.33
	18.18	1416.67	1116.67	1266.67	1066.67
	18.19	1350	1016.67	1316.67	1200
	18.2	1300	1066.67	1266.67	1183.33
	18.21	1350	1216.67	1333.33	1166.67
	18.22	1350	1283.33	1333.33	1200
	18.23	1333.33	1166.67	1200	1133.33
	18.24	1383.33	1050	1200	1100
	18.25	1383.33	1050	1266.67	1216.67
	18.26	1316.67	1066.67	1183.33	1250
	18.27	1416.67	1116.67	1166.67	1150
	18.28	1450	1216.67	1500	1116.67
	18.29	1416.67	1300	1800	1150
	18.3	1433.33	1383.33	1833.33	1233.33
	18.31	1266.67	1383.33	1900	1283.33
	18.32	1250	1483.33	2116.67	1183.33
	18.33	1316.67	1633.33	2300	1150
	18.34	1400	1750	2666.67	1083.33
	18.35	1533.33	1983.33	2800	1066.67
	18.36	1550	2316.67	2983.33	1100
	18.37	1400	2600	3433.33	1083.33
	18.38	1216.67	2733.33	3633.33	1133.33
	18.39	1150	2750	3833.33	1100
	18.4	1233.33	2416.67	4400	1083.33
	18.41	1400	2116.67	4933.33	1233.33
	18.42	1400	2100	5233.33	1266.67
	18.43	1316.67	2033.33	5383.33	1100
	18.44	1250	1750	5200	1066.67
	18.45	1150	1483.33	4816.67	1166.67
	18.46	1250	1300	4483.33	1250
	18.47	1333.33	1116.67	3933.33	1250
	18.48	1250	1066.67	3400	1166.67
	18.49	1183.33	1166.67	3050	1133.33
	18.5	1133.33	1050	2433.33	1133.33
	18.51	1183.33	1133.33	1983.33	1100
	18.52	1200	1200	1800	1150
	18.53	1250	1033.33	1583.33	1250
	18.54	1316.67	983.333	1500	1366.67
	18.55	1316.67	1116.67	1550	1266.67
	18.56	1350	1266.67	1516.67	1233.33
	18.57	1366.67	1283.33	1466.67	1250
	18.58	1300	1216.67	1366.67	1150
	18.59	1233.33	1166.67	1233.33	1116.67
	18.6	1266.67	1033.33	1166.67	1266.67
	18.61	1233.33	916.667	1216.67	1283.33
	18.62	1216.67	916.667	1300	1216.67
	18.63	1366.67	1050	1266.67	1233.33
	18.64	1500	1116.67	1250	1283.33
	18.65	1400	1150	1200	1283.33
	18.66	1400	1233.33	1150	1233.33
	18.67	1350	1283.33	1183.33	1166.67
	18.68	1216.67	1250	1166.67	1150
	18.69	1266.67	1200	1100	1100
	18.7	1383.33	1166.67	1100	1100
	18.71	1316.67	1133.33	1150	1150
	18.72	1250	1100	1133.33	1116.67
	18.73	1283.33	1050	1133.33	1100
	18.74	1333.33	1100	1166.67	1183.33
	18.75	1333.33	1066.67	1183.33	1183.33
	18.76	1366.67	966.667	1233.33	1200
	18.77	1366.67	1033.33	1216.67	1300
	18.78	1366.67	1066.67	1083.33	1316.67
	18.79	1400	950	1033.33	1266.67
	18.8	1366.67	1016.67	1133.33	1200
	18.81	1283.33	1116.67	1250	1116.67
	18.82	1283.33	1083.33	1183.33	1133.33
	18.83	1300	1000	1016.67	1183.33
	18.84	1316.67	1033.33	1033.33	1166.67
	18.85	1283.33	1083.33	1133.33	1266.67
	18.86	1316.67	1066.67	1266.67	1300
	18.87	1366.67	1116.67	1266.67	1200
	18.88	1383.33	1183.33	1116.67	1183.33
	18.89	1316.67	1233.33	1083.33	1250
	18.9	1166.67	1233.33	1083.33	1316.67
	18.91	1150	1133.33	1000	1266.67
	18.92	1200	1050	900	1300
	18.93	1266.67	1100	983.333	1283.33
	18.94	1300	1033.33	1133.33	1100
	18.95	1300	966.667	1166.67	1066.67
	18.96	1300	1183.33	1266.67	1233.33
	18.97	1200	1333.33	1266.67	1400
	18.98	1183.33	1233.33	1033.33	1400
	18.99	1233.33	1066.67	1000	1300
	19	1300	1150	1133.33	1233.33
	19.01	1350	1216.67	1233.33	1300
	19.02	1283.33	1083.33	1150	1283.33
	19.03	1333.33	1050	1033.33	1150
	19.04	1416.67	1133.33	1100	1083.33
	19.05	1500	1116.67	1133.33	1116.67
	19.06	1516.67	1133.33	1133.33	1200
	19.07	1350	1250	1150	1233.33
	19.08	1233.33	1216.67	1216.67	1166.67
	19.09	1333.33	1100	1216.67	1133.33
	19.1	1366.67	1133.33	1150	1200
	19.11	1383.33	1200	1083.33	1283.33
	19.12	1416.67	1216.67	1100	1366.67
	19.13	1366.67	1250	1133.33	1350
	19.14	1233.33	1283.33	1016.67	1200
	19.15	1266.67	1250	1000	1200
	19.16	1400	1133.33	1183.33	1300
	19.17	1416.67	1033.33	1300	1300
	19.18	1333.33	1050	1300	1283.33
	19.19	1250	1050	1266.67	1266.67
	19.2	1366.67	983.333	1200	1300
	19.21	1516.67	1066.67	1083.33	1283.33
	19.22	1516.67	1250	1050	1283.33
	19.23	1433.33	1266.67	1100	1300
	19.24	1433.33	1183.33	1133.33	1216.67
	19.25	1483.33	1116.67	1083.33	1150
	19.26	1383.33	1133.33	1116.67	1166.67
	19.27	1350	1300	1166.67	1216.67
	19.28	1433.33	1316.67	1083.33	1300
	19.29	1416.67	1100	1083.33	1233.33
	19.3	1383.33	933.333	1216.67	1233.33
	19.31	1250	950	1233.33	1216.67
	19.32	1233.33	1066.67	1200	1266.67
	19.33	1300	1150	1166.67	1400
	19.34	1383.33	1200	1183.33	1283.33
	19.35	1433.33	1183.33	1250	1133.33
	19.36	1366.67	1150	1183.33	1216.67
	19.37	1466.67	1066.67	1133.33	1400
	19.38	1583.33	1050	1166.67	1300
	19.39	1550	1100	1200	1266.67
	19.4	1516.67	1150	1216.67	1250
	19.41	1383.33	1266.67	1166.67	1166.67
	19.42	1283.33	1400	1200	1216.67
	19.43	1300	1416.67	1216.67	1250
	19.44	1350	1266.67	1166.67	1183.33
	19.45	1333.33	1100	1200	1133.33
	19.46	1316.67	1100	1216.67	1166.67
	19.47	1316.67	1200	1233.33	1166.67
	19.48	1366.67	1183.33	1133.33	1233.33
	19.49	1533.33	1133.33	1050	1383.33
	19.5	1566.67	1133.33	1033.33	1383.33
	19.51	1450	1083.33	1083.33	1416.67
	19.52	1383.33	1116.67	1100	1466.67
	19.53	1350	1150	1166.67	1300
	19.54	1400	1150	1283.33	1233.33
	19.55	1483.33	1116.67	1250	1266.67
	19.56	1433.33	1050	1116.67	1216.67
	19.57	1383.33	1166.67	1100	1200
	19.58	1466.67	1200	1250	1300
	19.59	1633.33	1116.67	1283.33	1400
	19.6	1716.67	1133.33	1233.33	1300
	19.61	1650	1116.67	1200	1333.33
	19.62	1616.67	1183.33	1183.33	1350
	19.63	1533.33	1233.33	1183.33	1266.67
	19.64	1433.33	1166.67	1266.67	1233.33
	19.65	1450	1100	1350	1166.67
	19.66	1400	1116.67	1233.33	1183.33
	19.67	1283.33	1233.33	1250	1250
	19.68	1466.67	1283.33	1350	1266.67
	19.69	1616.67	1300	1350	1333.33
	19.7	1500	1283.33	1333.33	1350
	19.71	1516.67	1200	1333.33	1400
	19.72	1616.67	1083.33	1350	1450
	19.73	1600	1083.33	1233.33	1383.33
	19.74	1533.33	1200	1033.33	1216.67
	19.75	1416.67	1233.33	950	1283.33
	19.76	1316.67	1283.33	966.667	1433.33
	19.77	1316.67	1316.67	1116.67	1350
	19.78	1350	1266.67	1216.67	1333.33
	19.79	1383.33	1183.33	1266.67	1366.67
	19.8	1500	1166.67	1333.33	1250
	19.81	1450	1300	1300	1150
	19.82	1350	1266.67	1233.33	1266.67
	19.83	1416.67	1216.67	1233.33	1300
	19.84	1433.33	1183.33	1216.67	1266.67
	19.85	1366.67	1166.67	1250	1333.33
	19.86	1350	1200	1266.67	1416.67
	19.87	1433.33	1150	1283.33	1400
	19.88	1466.67	1133.33	1183.33	1333.33
	19.89	1466.67	1166.67	1133.33	1283.33
	19.9	1450	1150	1166.67	1233.33
	19.91	1416.67	1183.33	1100	1266.67
	19.92	1550	1216.67	1066.67	1300
	19.93	1583.33	1166.67	1133.33	1350
	19.94	1483.33	1050	1183.33	1350
	19.95	1450	1066.67	1200	1233.33
	19.96	1483.33	1166.67	1250	1150
	19.97	1500	1083.33	1250	1216.67
	19.98	1550	1000	1083.33	1416.67
	19.99	1550	1150	1016.67	1500
	20	1550	1250	1016.67	1416.67
	20.01	1500	1283.33	1050	1583.33
	20.02	1466.67	1316.67	1116.67	1583.33
	20.03	1516.67	1233.33	1133.33	1550
	20.04	1550	1233.33	1150	1450
	20.05	1483.33	1216.67	1200	1416.67
	20.06	1466.67	1133.33	1266.67	1566.67
	20.07	1466.67	1166.67	1250	1533.33
	20.08	1516.67	1150	1183.33	1583.33
	20.09	1550	1116.67	1250	1600
	20.1	1550	1183.33	1283.33	1716.67
	20.11	1466.67	1233.33	1250	1916.67
	20.12	1500	1283.33	1216.67	1866.67
	20.13	1533.33	1400	1316.67	1900
	20.14	1483.33	1416.67	1350	2083.33
	20.15	1433.33	1366.67	1250	2183.33
	20.16	1366.67	1366.67	1200	2233.33
	20.17	1416.67	1450	1233.33	2250
	20.18	1450	1450	1266.67	2150
	20.19	1400	1183.33	1233.33	2166.67
	20.2	1500	1050	1183.33	2133.33
	20.21	1583.33	1166.67	1166.67	1966.67
	20.22	1600	1150	1116.67	1866.67
	20.23	1600	1133.33	1066.67	1800
	20.24	1583.33	1183.33	1050	1833.33
	20.25	1566.67	1233.33	1100	1750
	20.26	1516.67	1200	1133.33	1783.33
	20.27	1466.67	1133.33	1316.67	1716.67
	20.28	1400	1050	1433.33	1616.67
	20.29	1350	1050	1316.67	1550
	20.3	1400	1100	1300	1400
	20.31	1450	1200	1350	1450
	20.32	1550	1283.33	1216.67	1483.33
	20.33	1600	1250	1183.33	1383.33
	20.34	1550	1200	1333.33	1316.67
	20.35	1516.67	1116.67	1433.33	1383.33
	20.36	1550	1083.33	1350	1433.33
	20.37	1566.67	1133.33	1250	1366.67
	20.38	1616.67	1183.33	1316.67	1316.67
	20.39	1633.33	1116.67	1283.33	1366.67
	20.4	1600	983.333	1266.67	1350
	20.41	1666.67	1033.33	1416.67	1333.33
	20.42	1800	1216.67	1383.33	1333.33
	20.43	1800	1366.67	1200	1466.67
	20.44	1716.67	1316.67	1066.67	1666.67
	20.45	1616.67	1250	1200	1633.33
	20.46	1550	1216.67	1350	1566.67
	20.47	1533.33	1216.67	1333.33	1483.33
	20.48	1550	1266.67	1266.67	1466.67
	20.49	1416.67	1333.33	1333.33	1433.33
	20.5	1366.67	1283.33	1316.67	1300
	20.51	1516.67	1166.67	1233.33	1266.67
	20.52	1533.33	1116.67	1200	1283.33
	20.53	1466.67	1116.67	1183.33	1333.33
	20.54	1466.67	1183.33	1300	1466.67
	20.55	1433.33	1200	1283.33	1516.67
	20.56	1466.67	1166.67	1133.33	1483.33
	20.57	1616.67	1233.33	1133.33	1516.67
	20.58	1600	1350	1250	1500
	20.59	1466.67	1300	1250	1433.33
	20.6	1500	1150	1166.67	1416.67
	20.61	1466.67	1100	1133.33	1333.33
	20.62	1450	1166.67	1116.67	1233.33
	20.63	1550	1250	1183.33	1300
	20.64	1633.33	1266.67	1250	1283.33
	20.65	1533.33	1283.33	1216.67	1400
	20.66	1483.33	1300	1216.67	1650
	20.67	1433.33	1333.33	1283.33	1600
	20.68	1333.33	1366.67	1350	1416.67
	20.69	1466.67	1216.67	1333.33	1500
	20.7	1483.33	1116.67	1350	1533.33
	20.71	1483.33	1283.33	1383.33	1450
	20.72	1483.33	1400	1433.33	1316.67
	20.73	1533.33	1266.67	1416.67	1316.67
	20.74	1716.67	1216.67	1383.33	1416.67
	20.75	1733.33	1266.67	1283.33	1433.33
	20.76	1533.33	1283.33	1300	1416.67
	20.77	1416.67	1283.33	1333.33	1466.67
	20.78	1550	1350	1366.67	1516.67
	20.79	1650	1383.33	1466.67	1566.67
	20.8	1666.67	1333.33	1416.67	1683.33
	20.81	1650	1200	1250	1783.33
	20.82	1616.67	1116.67	1200	1733.33
	20.83	1516.67	1200	1150	1650
	20.84	1500	1333.33	1150	1600
	20.85	1583.33	1283.33	1200	1683.33
	20.86	1700	1200	1250	1850
	20.87	1733.33	1166.67	1300	2000
	20.88	1633.33	1200	1150	2050
	20.89	1666.67	1183.33	1183.33	2216.67
	20.9	1533.33	1183.33	1383.33	2266.67
	20.91	1516.67	1266.67	1366.67	2050
	20.92	1483.33	1416.67	1283.33	2050
	20.93	1466.67	1383.33	1233.33	2000
	20.94	1450	1283.33	1216.67	1900
	20.95	1550	1283.33	1333.33	1833.33
	20.96	1650	1416.67	1316.67	1900
	20.97	1633.33	1383.33	1233.33	1883.33
	20.98	1650	1266.67	1200	1683.33
	20.99	1666.67	1266.67	1233.33	1616.67
	21	1716.67	1283.33	1183.33	1666.67
	21.01	1750	1283.33	1166.67	1566.67
	21.02	1766.67	1166.67	1216.67	1516.67
	21.03	1683.33	1083.33	1266.67	1533.33
	21.04	1583.33	1283.33	1183.33	1433.33
	21.05	1666.67	1466.67	1116.67	1450
	21.06	1716.67	1366.67	1333.33	1516.67
	21.07	1616.67	1250	1416.67	1433.33
	21.08	1533.33	1283.33	1383.33	1500
	21.09	1383.33	1233.33	1383.33	1533.33
	21.1	1416.67	1083.33	1366.67	1400
	21.11	1433.33	1116.67	1283.33	1416.67
	21.12	1516.67	1316.67	1233.33	1450
	21.13	1733.33	1250	1333.33	1416.67
	21.14	1816.67	1116.67	1383.33	1350
	21.15	1700	1166.67	1483.33	1383.33
	21.16	1450	1283.33	1516.67	1366.67
	21.17	1483.33	1283.33	1466.67	1383.33
	21.18	1600	1300	1450	1416.67
	21.19	1666.67	1300	1350	1383.33
	21.2	1716.67	1300	1316.67	1400
	21.21	1700	1383.33	1266.67	1366.67
	21.22	1633.33	1383.33	1283.33	1350
	21.23	1483.33	1250	1383.33	1316.67
	21.24	1516.67	1333.33	1300	1383.33
	21.25	1550	1366.67	1233.33	1500
	21.26	1516.67	1216.67	1283.33	1416.67
	21.27	1566.67	1116.67	1283.33	1350
	21.28	1533.33	1200	1316.67	1316.67
	21.29	1450	1316.67	1366.67	1400
	21.3	1533.33	1350	1350	1516.67
	21.31	1533.33	1400	1266.67	1516.67
	21.32	1500	1383.33	1400	1466.67
	21.33	1516.67	1400	1450	1450
	21.34	1533.33	1433.33	1366.67	1333.33
	21.35	1616.67	1333.33	1300	1283.33
	21.36	1633.33	1300	1200	1400
	21.37	1550	1250	1216.67	1483.33
	21.38	1516.67	1216.67	1266.67	1550
	21.39	1533.33	1250	1350	1500
	21.4	1550	1266.67	1316.67	1383.33
	21.41	1583.33	1266.67	1333.33	1383.33
	21.42	1600	1366.67	1366.67	1416.67
	21.43	1566.67	1316.67	1316.67	1516.67
	21.44	1550	1216.67	1266.67	1583.33
	21.45	1633.33	1316.67	1316.67	1483.33
	21.46	1616.67	1333.33	1433.33	1366.67
	21.47	1633.33	1200	1350	1366.67
	21.48	1766.67	1116.67	1283.33	1366.67
	21.49	1750	1283.33	1350	1333.33
	21.5	1816.67	1316.67	1433.33	1366.67
	21.51	1816.67	1250	1316.67	1316.67
	21.52	1633.33	1250	1333.33	1366.67
	21.53	1616.67	1350	1483.33	1450
	21.54	1716.67	1300	1516.67	1533.33
	21.55	1750	1233.33	1433.33	1600
	21.56	1733.33	1283.33	1400	1600
	21.57	1750	1366.67	1333.33	1750
	21.58	1700	1366.67	1316.67	1500
	21.59	1750	1333.33	1266.67	1316.67
	21.6	1716.67	1300	1233.33	1400
	21.61	1700	1366.67	1300	1466.67
	21.62	1766.67	1400	1300	1450
	21.63	1683.33	1333.33	1183.33	1300
	21.64	1633.33	1316.67	1250	1266.67
	21.65	1616.67	1333.33	1316.67	1233.33
	21.66	1550	1200	1266.67	1316.67
	21.67	1550	1116.67	1250	1483.33
	21.68	1483.33	1166.67	1300	1533.33
	21.69	1650	1316.67	1450	1550
	21.7	1883.33	1400	1516.67	1583.33
	21.71	1983.33	1266.67	1333.33	1433.33
	21.72	1866.67	1350	1233.33	1300
	21.73	1816.67	1433.33	1300	1300
	21.74	1616.67	1516.67	1383.33	1433.33
	21.75	1550	1383.33	1316.67	1500
	21.76	1733.33	1233.33	1250	1533.33
	21.77	1683.33	1200	1400	1533.33
	21.78	1616.67	1300	1450	1550
	21.79	1633.33	1433.33	1383.33	1666.67
	21.8	1766.67	1283.33	1450	1616.67
	21.81	1900	1283.33	1533.33	1650
	21.82	1900	1366.67	1333.33	1633.33
	21.83	1800	1266.67	1333.33	1500
	21.84	1766.67	1216.67	1416.67	1433.33
	21.85	1783.33	1233.33	1483.33	1416.67
	21.86	1800	1233.33	1533.33	1416.67
	21.87	1733.33	1300	1483.33	1516.67
	21.88	1766.67	1366.67	1450	1516.67
	21.89	1950	1333.33	1383.33	1500
	21.9	1783.33	1333.33	1350	1450
	21.91	1766.67	1316.67	1333.33	1516.67
	21.92	1750	1300	1316.67	1516.67
	21.93	1933.33	1433.33	1383.33	1600
	21.94	2016.67	1383.33	1216.67	1616.67
	21.95	2033.33	1233.33	1316.67	1583.33
	21.96	1950	1216.67	1316.67	1516.67
	21.97	1850	1333.33	1250	1400
	21.98	1800	1366.67	1300	1400
	21.99	1816.67	1350	1283.33	1516.67
	22	1866.67	1433.33	1383.33	1600
	22.01	1900	1516.67	1400	1583.33
	22.02	1916.67	1500	1483.33	1533.33
	22.03	1800	1366.67	1466.67	1416.67
	22.04	1666.67	1283.33	1383.33	1350
	22.05	1533.33	1366.67	1450	1383.33
	22.06	1600	1466.67	1383.33	1566.67
	22.07	1766.67	1416.67	1300	1616.67
	22.08	1850	1400	1300	1683.33
	22.09	1900	1350	1416.67	1716.67
	22.1	1916.67	1366.67	1516.67	1616.67
	22.11	1966.67	1400	1300	1600
	22.12	1766.67	1333.33	1283.33	1600
	22.13	1783.33	1216.67	1300	1483.33
	22.14	1566.67	1216.67	1233.33	1483.33
	22.15	1566.67	1300	1183.33	1616.67
	22.16	1700	1400	1116.67	1650
	22.17	1616.67	1533.33	1200	1600
	22.18	1650	1533.33	1283.33	1666.67
	22.19	1666.67	1500	1266.67	1616.67
	22.2	1566.67	1450	1433.33	1583.33
	22.21	1533.33	1316.67	1466.67	1533.33
	22.22	1483.33	1366.67	1383.33	1483.33
	22.23	1716.67	1400	1333.33	1466.67
	22.24	1866.67	1316.67	1316.67	1383.33
	22.25	1716.67	1333.33	1333.33	1366.67
	22.26	1450	1383.33	1433.33	1450
	22.27	1566.67	1300	1450	1533.33
	22.28	1833.33	1266.67	1433.33	1550
	22.29	1716.67	1383.33	1300	1566.67
	22.3	1700	1416.67	1283.33	1533.33
	22.31	1750	1383.33	1250	1500
	22.32	1883.33	1383.33	1283.33	1500
	22.33	2066.67	1283.33	1300	1550
	22.34	2000	1283.33	1266.67	1550
	22.35	1916.67	1216.67	1333.33	1800
	22.36	1883.33	1200	1450	1533.33
	22.37	1883.33	1300	1383.33	1416.67
	22.38	1800	1300	1350	1533.33
	22.39	1700	1383.33	1383.33	1550
	22.4	1850	1450	1283.33	1466.67
	22.41	1950	1450	1233.33	1433.33
	22.42	1833.33	1500	1150	1433.33
	22.43	1933.33	1433.33	1266.67	1433.33
	22.44	1933.33	1333.33	1450	1433.33
	22.45	1716.67	1300	1383.33	1416.67
	22.46	1800	1250	1183.33	1383.33
	22.47	1883.33	1250	1216.67	1350
	22.48	2000	1383.33	1300	1366.67
	22.49	2050	1416.67	1433.33	1483.33
	22.5	1900	1333.33	1600	1516.67
	22.51	1916.67	1350	1566.67	1516.67
	22.52	1883.33	1433.33	1350	1433.33
	22.53	1833.33	1400	1383.33	1416.67
	22.54	1900	1350	1383.33	1450
	22.55	1950	1250	1250	1550
	22.56	1666.67	1233.33	1466.67	1633.33
	22.57	1500	1450	1533.33	1666.67
	22.58	1600	1516.67	1350	1666.67
	22.59	1650	1650	1383.33	1650
	22.6	1666.67	1566.67	1383.33	1683.33
	22.61	1783.33	1300	1283.33	1533.33
	22.62	1650	1250	1416.67	1383.33
	22.63	1683.33	1333.33	1483.33	1416.67
	22.64	1666.67	1516.67	1383.33	1450
	22.65	1700	1550	1400	1466.67
	22.66	1783.33	1366.67	1483.33	1433.33
	22.67	1683.33	1316.67	1483.33	1566.67
	22.68	1616.67	1383.33	1416.67	1633.33
	22.69	1616.67	1316.67	1383.33	1650
	22.7	1600	1166.67	1366.67	1650
	22.71	1616.67	1266.67	1466.67	1683.33
	22.72	1650	1433.33	1383.33	1650
	22.73	1750	1400	1183.33	1550
	22.74	1700	1316.67	1050	1466.67
	22.75	1616.67	1416.67	1000	1633.33
	22.76	1750	1433.33	1333.33	1616.67
	22.77	2033.33	1516.67	1366.67	1566.67
	22.78	1850	1483.33	1400	1466.67
	22.79	1583.33	1383.33	1283.33	1516.67
	22.8	1750	1450	1166.67	1483.33
	22.81	1866.67	1400	1166.67	1566.67
	22.82	1750	1450	1300	1416.67
	22.83	1600	1383.33	1400	1216.67
	22.84	1566.67	1416.67	1233.33	1416.67
	22.85	1683.33	1316.67	1333.33	1516.67
	22.86	1683.33	1216.67	1283.33	1483.33
	22.87	1683.33	1250	1233.33	1583.33
	22.88	1733.33	1316.67	1266.67	1650
	22.89	1750	1266.67	1400	1650
	22.9	1716.67	1250	1533.33	1650
	22.91	1633.33	1183.33	1416.67	1600
	22.92	1516.67	1250	1350	1616.67
	22.93	1600	1383.33	1350	1550
	22.94	1600	1333.33	1333.33	1416.67
	22.95	1750	1233.33	1383.33	1450
	22.96	1783.33	1283.33	1450	1583.33
	22.97	1916.67	1333.33	1483.33	1616.67
	22.98	1816.67	1366.67	1333.33	1650
	22.99	1733.33	1483.33	1366.67	1683.33
	23	1666.67	1300	1366.67	1533.33
	23.01	1883.33	1183.33	1183.33	1433.33
	23.02	1866.67	1216.67	1133.33	1500
	23.03	1633.33	1300	1283.33	1433.33
	23.04	1600	1266.67	1300	1500
	23.05	1683.33	1300	1100	1616.67
	23.06	1700	1450	1083.33	1466.67
	23.07	1550	1366.67	1300	1450
	23.08	1583.33	1300	1316.67	1466.67
	23.09	1750	1200	1233.33	1416.67
	23.1	1683.33	1166.67	1233.33	1383.33
	23.11	1700	1350	1266.67	1433.33
	23.12	1683.33	1416.67	1450	1483.33
	23.13	1766.67	1483.33	1466.67	1450
	23.14	1783.33	1416.67	1383.33	1500
	23.15	1783.33	1366.67	1316.67	1650
	23.16	1650	1466.67	1416.67	1616.67
	23.17	1733.33	1550	1416.67	1700
	23.18	1716.67	1433.33	1250	1650
	23.19	1816.67	1400	1200	1566.67
	23.2	1966.67	1450	1300	1600
	23.21	1766.67	1433.33	1333.33	1533.33
	23.22	1666.67	1433.33	1383.33	1466.67
	23.23	1800	1533.33	1416.67	1550
	23.24	1800	1616.67	1300	1616.67
	23.25	1800	1533.33	1200	1583.33
	23.26	1850	1516.67	1250	1716.67
	23.27	1616.67	1483.33	1466.67	1783.33
	23.28	1766.67	1550	1400	1700
	23.29	1850	1533.33	1316.67	1500
	23.3	1883.33	1416.67	1366.67	1416.67
	23.31	1850	1200	1583.33	1516.67
	23.32	1750	1300	1450	1433.33
	23.33	1850	1500	1466.67	1316.67
	23.34	1816.67	1416.67	1400	1466.67
	23.35	1616.67	1333.33	1416.67	1566.67
	23.36	1766.67	1400	1483.33	1600
	23.37	1733.33	1333.33	1583.33	1716.67
	23.38	1766.67	1300	1483.33	1700
	23.39	1633.33	1383.33	1233.33	1583.33
	23.4	1583.33	1333.33	1150	1500
	23.41	1916.67	1366.67	1183.33	1450
	23.42	1866.67	1350	1233.33	1566.67
	23.43	1950	1233.33	1283.33	1516.67
	23.44	1966.67	1300	1250	1600
	23.45	1916.67	1350	1283.33	1600
	23.46	1850	1133.33	1283.33	1650
	23.47	1883.33	1200	1283.33	1516.67
	23.48	1916.67	1316.67	1350	1366.67
	23.49	1700	1383.33	1416.67	1566.67
	23.5	1866.67	1333.33	1316.67	1733.33
	23.51	1966.67	1383.33	1216.67	1683.33
	23.52	1916.67	1416.67	1200	1566.67
	23.53	1766.67	1466.67	1300	1566.67
	23.54	1633.33	1483.33	1300	1650
	23.55	1683.33	1383.33	1133.33	1483.33
	23.56	1733.33	1316.67	1233.33	1416.67
	23.57	1883.33	1183.33	1216.67	1500
	23.58	1666.67	1150	1233.33	1433.33
	23.59	1683.33	1166.67	1250	1533.33
	23.6	1850	1283.33	1366.67	1533.33
	23.61	1833.33	1300	1250	1450
	23.62	1850	1233.33	1283.33	1500
	23.63	1933.33	1400	1266.67	1416.67
	23.64	1866.67	1366.67	1216.67	1433.33
	23.65	1566.67	1350	1250	1433.33
	23.66	1533.33	1183.33	1483.33	1583.33
	23.67	1533.33	1016.67	1250	1483.33
	23.68	1633.33	1066.67	1333.33	1516.67
	23.69	1583.33	1200	1183.33	1166.67
	23.7	1783.33	1266.67	1166.67	1166.67
	23.71	1850	1150	1216.67	1350
	23.72	1600	1166.67	1283.33	1633.33
	23.73	1600	1233.33	1333.33	1616.67
	23.74	1683.33	1216.67	1300	1450
	23.75	1550	1233.33	1200	1450
	23.76	1466.67	1283.33	1133.33	1383.33
	23.77	1583.33	1200	1233.33	1416.67
	23.78	1650	1233.33	1200	1683.33
	23.79	1666.67	1150	1233.33	1600
	23.8	1550	1166.67	1300	1400
	23.81	1533.33	1283.33	1333.33	1383.33
	23.82	1766.67	1333.33	1216.67	1600
	23.83	1816.67	1433.33	1166.67	1466.67
	23.84	1650	1483.33	1183.33	1416.67
	23.85	1633.33	1383.33	1350	1433.33
	23.86	1716.67	1400	1233.33	1350
	23.87	1700	1450	1150	1416.67
	23.88	1683.33	1316.67	1183.33	1266.67
	23.89	1666.67	1216.67	1400	1383.33
	23.9	1716.67	1300	1400	1383.33
	23.91	1650	1316.67	1250	1466.67
	23.92	1700	1233.33	1216.67	1566.67
	23.93	1800	1266.67	1233.33	1433.33
	23.94	1700	1133.33	1333.33	1300
	23.95	1633.33	1100	1316.67	1333.33
	23.96	1550	1133.33	1233.33	1450
	23.97	1666.67	1133.33	1416.67	1433.33
	23.98	1700	1133.33	1433.33	1433.33
	23.99	1733.33	1150	1300	1533.33
	24	1783.33	1350	1166.67	1400
	24.01	1733.33	1383.33	1200	1383.33
	24.02	1533.33	1400	1050	1566.67
	24.03	1516.67	1383.33	1133.33	1500
	24.04	1583.33	1266.67	1216.67	1350
	24.05	1566.67	1116.67	1400	1450
	24.06	1566.67	1300	1316.67	1450
	24.07	1666.67	1366.67	1250	1583.33
	24.08	1600	1300	1100	1433.33
	24.09	1633.33	1333.33	1116.67	1416.67
	24.1	1700	1366.67	1350	1433.33
	24.11	1566.67	1350	1433.33	1333.33
	24.12	1700	1283.33	1383.33	1400
	24.13	1650	1250	1316.67	1483.33
	24.14	1616.67	1316.67	1266.67	1533.33
	24.15	1700	1366.67	1216.67	1433.33
	24.16	1683.33	1333.33	1250	1616.67
	24.17	1600	1283.33	1383.33	1616.67
	24.18	1633.33	1383.33	1400	1366.67
	24.19	1683.33	1333.33	1300	1333.33
	24.2	1600	1283.33	1283.33	1450
	24.21	1783.33	1200	1250	1433.33
	24.22	1800	1183.33	1216.67	1533.33
	24.23	1650	1383.33	1150	1550
	24.24	1666.67	1266.67	1316.67	1566.67
	24.25	1816.67	1166.67	1333.33	1516.67
	24.26	1750	1133.33	1183.33	1483.33
	24.27	1683.33	1233.33	1316.67	1483.33
	24.28	1566.67	1266.67	1266.67	1416.67
	24.29	1633.33	1200	1250	1600
	24.3	1950	1200	1433.33	1366.67
	24.31	1783.33	1183.33	1366.67	1366.67
	24.32	1583.33	1283.33	1266.67	1366.67
	24.33	1583.33	1316.67	1316.67	1216.67
	24.34	1616.67	1200	1100	1350
	24.35	1483.33	1283.33	1166.67	1400
	24.36	1633.33	1250	1266.67	1350
	24.37	1700	1166.67	1250	1216.67
	24.38	1600	1233.33	1350	1233.33
	24.39	1566.67	1233.33	1383.33	1350
	24.4	1616.67	1216.67	1283.33	1600
	24.41	1583.33	1216.67	1283.33	1533.33
	24.42	1633.33	1083.33	1300	1450
	24.43	1600	1183.33	1233.33	1300
	24.44	1566.67	1116.67	1233.33	1416.67
	24.45	1550	1100	1200	1566.67
	24.46	1533.33	1283.33	1183.33	1516.67
	24.47	1416.67	1383.33	1116.67	1366.67
	24.48	1550	1133.33	1166.67	1366.67
	24.49	1516.67	1133.33	1233.33	1150
	24.5	1616.67	1300	1183.33	1283.33
	24.51	1533.33	1200	1016.67	1366.67
	24.52	1500	1133.33	1050	1383.33
	24.53	1383.33	1100	1216.67	1416.67
	24.54	1416.67	1183.33	1316.67	1366.67
	24.55	1433.33	1116.67	1283.33	1350
	24.56	1583.33	1250	1350	1416.67
	24.57	1550	1250	1250	1400
	24.58	1516.67	1166.67	1150	1366.67
	24.59	1666.67	1250	1283.33	1350
	24.6	1716.67	1450	1316.67	1416.67
	24.61	1733.33	1483.33	1216.67	1400
	24.62	1700	1250	1150	1350
	24.63	1766.67	1183.33	1283.33	1383.33
	24.64	1533.33	1100	1166.67	1416.67
	24.65	1650	1200	1233.33	1466.67
	24.66	1816.67	1283.33	1150	1566.67
	24.67	1583.33	1133.33	1150	1433.33
	24.68	1566.67	1100	1316.67	1416.67
	24.69	1716.67	1066.67	1150	1466.67
	24.7	1433.33	1300	1166.67	1333.33
	24.71	1300	1050	1150	1250
	24.72	1316.67	1133.33	1083.33	1400
	24.73	1483.33	1283.33	1050	1550
	24.74	1500	1366.67	1016.67	1300
	24.75	1450	1233.33	1200	1300
	24.76	1666.67	1183.33	1183.33	1300
	24.77	1750	1133.33	1200	1266.67
	24.78	1816.67	1200	1316.67	1383.33
	24.79	1533.33	1200	1250	1316.67
	24.8	1583.33	1133.33	1233.33	1266.67
	24.81	1750	1233.33	1350	1383.33
	24.82	1516.67	1200	1516.67	1333.33
	24.83	1583.33	1050	1383.33	1183.33
	24.84	1583.33	1166.67	1200	1133.33
	24.85	1500	1116.67	1283.33	1316.67
	24.86	1500	1216.67	1383.33	1333.33
	24.87	1650	1116.67	1250	1333.33
	24.88	1516.67	1266.67	1183.33	1316.67
	24.89	1700	1183.33	1100	1383.33
	24.9	1533.33	1250	966.667	1433.33
	24.91	1516.67	1283.33	1150	1450
	24.92	1616.67	1383.33	1133.33	1416.67
	24.93	1416.67	1300	1316.67	1566.67
	24.94	1600	1383.33	1216.67	1416.67
	24.95	1633.33	1350	1150	1366.67
	24.96	1550	1183.33	1183.33	1450
	24.97	1566.67	1150	1233.33	1483.33
	24.98	1550	1266.67	1250	1400
	24.99	1533.33	1150	1266.67	1483.33
	25	1583.33	1166.67	1066.67	1450
	25.01	1666.67	1300	1166.67	1483.33
	25.02	1683.33	1266.67	1266.67	1516.67
	25.03	1700	1250	1166.67	1416.67
	25.04	1600	1183.33	1100	1366.67
	25.05	1516.67	1200	1350	1450
	25.06	1400	1150	1366.67	1500
	25.07	1500	1150	1216.67	1366.67
	25.08	1500	1183.33	1083.33	1350
	25.09	1683.33	1300	1050	1350
	25.1	1483.33	1100	1250	1366.67
	25.11	1433.33	1133.33	1200	1400
	25.12	1616.67	1133.33	1283.33	1366.67
	25.13	1466.67	1133.33	1233.33	1283.33
	25.14	1383.33	1183.33	1166.67	1316.67
	25.15	1550	1283.33	1300	1433.33
	25.16	1616.67	1200	1200	1583.33
	25.17	1566.67	1066.67	1083.33	1550
	25.18	1333.33	1050	1033.33	1266.67
	25.19	1433.33	1033.33	1150	1366.67
	25.2	1716.67	1183.33	1283.33	1533.33
	25.21	1816.67	1283.33	1300	1416.67
	25.22	1800	1350	1300	1200
	25.23	1683.33	1166.67	1200	1316.67
	25.24	1600	1083.33	1066.67	1466.67
	25.25	1600	1183.33	1166.67	1250
	25.26	1433.33	1166.67	1300	1250
	25.27	1550	1200	1283.33	1200
	25.28	1850	1266.67	1216.67	1100
	25.29	1700	1316.67	1150	1333.33
	25.3	1533.33	1166.67	966.667	1350
	25.31	1433.33	1433.33	1016.67	1533.33
	25.32	1500	1283.33	1216.67	1450
	25.33	1600	1166.67	1333.33	1383.33
	25.34	1683.33	1200	1133.33	1533.33
	25.35	1783.33	1150	1066.67	1466.67
	25.36	1916.67	1166.67	1133.33	1433.33
	25.37	1933.33	1100	1200	1183.33
	25.38	2000	1216.67	1250	1300
	25.39	2116.67	1216.67	1183.33	1516.67
	25.4	2150	1483.33	1300	1283.33
	25.41	2150	1500	1216.67	1400
	25.42	2050	1650	1333.33	1433.33
	25.43	2050	1650	1466.67	1216.67
	25.44	2033.33	1566.67	1300	1450
	25.45	1900	1783.33	1250	1666.67
	25.46	1916.67	1933.33	1416.67	1500
	25.47	2150	1983.33	1283.33	1266.67
	25.48	2050	2166.67	1066.67	1350
	25.49	1816.67	2300	1200	1316.67
	25.5	1833.33	2616.67	1216.67	1333.33
	25.51	1916.67	2866.67	1233.33	1433.33
	25.52	1766.67	3016.67	1400	1450
	25.53	1566.67	2700	1400	1450
	25.54	1650	2566.67	1366.67	1500
	25.55	1466.67	2333.33	1200	1516.67
	25.56	1200	2350	1400	1416.67
	25.57	1250	2466.67	1200	1483.33
	25.58	1516.67	2133.33	1300	1700
	25.59	1683.33	2016.67	1183.33	1516.67
	25.6	1600	1700	1233.33	1583.33
	25.61	1450	1616.67	1166.67	1733.33
	25.62	1500	1416.67	1033.33	1466.67
	25.63	1700	1250	1316.67	1450
	25.64	1700	1150	1316.67	1516.67
	25.65	1616.67	1350	1150	1400
	25.66	1616.67	1333.33	1133.33	1316.67
	25.67	1600	1216.67	1133.33	1450
	25.68	1466.67	1050	1233.33	1283.33
	25.69	1350	1166.67	1133.33	1483.33
	25.7	1600	1250	1200	1483.33
	25.71	1600	1133.33	1200	1283.33
	25.72	1533.33	1216.67	1083.33	1300
	25.73	1433.33	1250	1100	1283.33
	25.74	1433.33	1250	1033.33	1300
	25.75	1616.67	1100	1216.67	1416.67
	25.76	1433.33	1066.67	1433.33	1183.33
	25.77	1400	1166.67	1200	1266.67
	25.78	1566.67	1166.67	1100	1183.33
	25.79	1450	1050	1016.67	1216.67
	25.8	1316.67	1300	1333.33	1366.67
	25.81	1316.67	1216.67	1200	1150
	25.82	1366.67	1016.67	1100	916.667
	25.83	1433.33	1016.67	1083.33	1150
	25.84	1266.67	983.333	1033.33	1316.67
	25.85	1416.67	1050	1000	1250
	25.86	1233.33	983.333	1083.33	1233.33
	25.87	1333.33	1150	1116.67	1283.33
	25.88	1600	1066.67	1150	1250
	25.89	1500	1133.33	1066.67	1433.33
	25.9	1383.33	1116.67	1166.67	1300
	25.91	1416.67	966.667	1150	1333.33
	25.92	1316.67	1133.33	1116.67	1166.67
	25.93	1666.67	1100	1016.67	966.667
	25.94	1566.67	1033.33	1250	1333.33
	25.95	1166.67	966.667	1183.33	1200
	25.96	1433.33	1016.67	983.333	1066.67
	25.97	1516.67	1066.67	1083.33	1183.33
	25.98	1333.33	1100	1316.67	1333.33
	25.99	1583.33	800	1166.67	1350
	26	1400	983.333	1100	1316.67
	26.01	1466.67	1150	1066.67	1316.67
	26.02	1500	1000	1050	1333.33
	26.03	1600	1000	1100	1416.67
	26.04	1633.33	1200	966.667	1283.33
	26.05	1483.33	1200	1016.67	1183.33
	26.06	1533.33	1216.67	1166.67	1283.33
	26.07	1533.33	1166.67	900	1283.33
	26.08	1416.67	1066.67	916.667	1333.33
	26.09	1550	1266.67	1050	1366.67
	26.1	1266.67	1083.33	1166.67	1216.67
	26.11	1300	816.667	1100	1333.33
	26.12	1516.67	983.333	883.333	1316.67
	26.13	1466.67	1050	1050	1200
	26.14	1366.67	866.667	1200	1316.67
	26.15	1383.33	1200	1183.33	1316.67
	26.16	1400	1183.33	1050	1150
	26.17	1250	950	966.667	1333.33
	26.18	1366.67	983.333	966.667	1416.67
	26.19	1516.67	1100	1033.33	1366.67
	26.2	1433.33	1016.67	1150	1200
	26.21	1683.33	1166.67	1233.33	1233.33
	26.22	1516.67	1016.67	1000	1100
	26.23	1616.67	883.333	1166.67	1050
	26.24	1533.33	1116.67	966.667	1166.67
	26.25	1516.67	1350	983.333	1150
	26.26	1466.67	1316.67	1016.67	1183.33
	26.27	1633.33	1016.67	983.333	1250
	26.28	1733.33	1050	1100	1216.67
	26.29	1583.33	1200	1316.67	1233.33
	26.3	1300	1183.33	1083.33	1200
	26.31	1416.67	950	1016.67	1150
	26.32	1350	1083.33	1216.67	1200
	26.33	1366.67	1033.33	1083.33	1083.33
	26.34	1466.67	1000	966.667	1100
	26.35	1200	1083.33	1066.67	1350
	26.36	1333.33	1283.33	950	1466.67
	26.37	1450	1183.33	1150	1183.33
	26.38	1250	1116.67	1266.67	1233.33
	26.39	1316.67	966.667	1216.67	1183.33
	26.4	1233.33	1016.67	1100	1200
	26.41	1333.33	1000	1033.33	1083.33
	26.42	1500	966.667	1000	1150
	26.43	1300	1083.33	1033.33	1266.67
	26.44	1266.67	1050	1150	1383.33
	26.45	1166.67	1083.33	1083.33	1100
	26.46	1183.33	1016.67	1066.67	950
	26.47	1366.67	1050	1016.67	1116.67
	26.48	1433.33	1050	1133.33	1200
	26.49	1366.67	1016.67	1050	1016.67
	26.5	1183.33	983.333	1083.33	1100
	26.51	1183.33	1166.67	1016.67	1050
	26.52	1233.33	1150	1083.33	1033.33
	26.53	1133.33	1116.67	1000	1050
	26.54	1100	1100	1050	1233.33
	26.55	1200	883.333	1166.67	1300
	26.56	1450	983.333	983.333	1116.67
	26.57	1333.33	1233.33	916.667	1050
	26.58	1183.33	1150	966.667	1050
	26.59	1433.33	1083.33	883.333	1166.67
	26.6	1616.67	966.667	1000	916.667
	26.61	1450	900	916.667	866.667
	26.62	1350	866.667	1033.33	1133.33
	26.63	1416.67	1100	1066.67	1066.67
	26.64	1433.33	1116.67	966.667	1000
	26.65	1150	1050	1166.67	1200
	26.66	1233.33	1000	1166.67	1300
	26.67	1200	1033.33	966.667	1316.67
	26.68	1316.67	1233.33	983.333	1200
	26.69	1200	1100	1016.67	1266.67
	26.7	1450	883.333	1033.33	1133.33
	26.71	1516.67	933.333	1166.67	1166.67
	26.72	1466.67	950	1116.67	1283.33
	26.73	1450	1133.33	1000	1316.67
	26.74	1316.67	1133.33	933.333	1283.33
	26.75	1466.67	1033.33	1033.33	1150
	26.76	1350	1100	916.667	983.333
	26.77	1366.67	966.667	1000	1150
	26.78	1516.67	1133.33	950	1050
	26.79	1350	1066.67	966.667	1116.67
	26.8	1183.33	1133.33	1050	1266.67
	26.81	1266.67	1016.67	900	1066.67
	26.82	1300	1100	883.333	900
	26.83	1400	1266.67	1033.33	1166.67
	26.84	1433.33	1033.33	983.333	1133.33
	26.85	1450	1033.33	983.333	1216.67
	26.86	1183.33	950	1183.33	1183.33
	26.87	1366.67	1150	1133.33	1316.67
	26.88	1266.67	1066.67	1166.67	1183.33
	26.89	1350	1083.33	900	1233.33
	26.9	1350	1100	916.667	1283.33
	26.91	1566.67	1016.67	1116.67	1233.33
	26.92	1500	1083.33	1150	1316.67
	26.93	1383.33	1100	966.667	1350
	26.94	1416.67	916.667	983.333	1283.33
	26.95	1400	966.667	1050	1133.33
	26.96	1550	1050	1033.33	1116.67
	26.97	1500	1050	983.333	1166.67
	26.98	1316.67	1050	900	1283.33
	26.99	1083.33	1166.67	983.333	1316.67
	27	1333.33	1200	1083.33	1133.33
	27.01	1416.67	1066.67	1100	1200
	27.02	1333.33	1250	1066.67	1216.67
	27.03	1433.33	1116.67	1016.67	1166.67
	27.04	1333.33	1183.33	916.667	1283.33
	27.05	1483.33	1083.33	933.333	1383.33
	27.06	1383.33	1283.33	1133.33	1233.33
	27.07	1300	1283.33	966.667	1283.33
	27.08	1150	1016.67	850	1383.33
	27.09	1216.67	1050	933.333	1333.33
	27.1	1383.33	1016.67	1016.67	1300
	27.11	1300	1050	916.667	1550
	27.12	1283.33	1183.33	1000	1783.33
	27.13	1200	1233.33	1050	1700
	27.14	1266.67	1216.67	916.667	1800
	27.15	1183.33	1166.67	916.667	1716.67
	27.16	1350	966.667	900	1800
	27.17	1333.33	916.667	1000	1883.33
	27.18	1316.67	933.333	1150	1750
	27.19	1383.33	966.667	1066.67	1916.67
	27.2	1366.67	1066.67	1033.33	1816.67
	27.21	1466.67	1166.67	1033.33	1700
	27.22	1333.33	1000	1016.67	1966.67
	27.23	1300	900	1066.67	2033.33
	27.24	1250	966.667	1233.33	1866.67
	27.25	1166.67	1116.67	983.333	1983.33
	27.26	1233.33	1050	900	1933.33
	27.27	1300	883.333	950	1516.67
	27.28	1216.67	1033.33	900	1500
	27.29	1316.67	1050	883.333	1583.33
	27.3	1283.33	883.333	1000	1583.33
	27.31	1150	866.667	1016.67	1500
	27.32	1050	983.333	850	1400
	27.33	1133.33	1066.67	933.333	1416.67
	27.34	1350	1083.33	983.333	1200
	27.35	1366.67	1050	983.333	1116.67
	27.36	1250	1100	1250	1283.33
	27.37	1250	1116.67	1150	1366.67
	27.38	1166.67	1033.33	916.667	1166.67
	27.39	1116.67	850	1000	1283.33
	27.4	1150	816.667	1083.33	1316.67
	27.41	1116.67	950	1016.67	1383.33
	27.42	1516.67	1083.33	983.333	1266.67
	27.43	1300	1166.67	1033.33	1150
	27.44	1300	1100	1050	1200
	27.45	1300	1016.67	1083.33	1350
	27.46	1350	900	1100	1116.67
	27.47	1383.33	1050	933.333	1150
	27.48	1400	1216.67	883.333	1250
	27.49	1183.33	1133.33	916.667	1150
	27.5	1283.33	900	1000	1066.67
	27.51	1333.33	950	933.333	1083.33
	27.52	1450	983.333	983.333	1233.33
	27.53	1350	1066.67	1133.33	1166.67
	27.54	1200	1066.67	1083.33	1166.67
	27.55	1166.67	983.333	1000	1116.67
	27.56	1216.67	933.333	983.333	1250
	27.57	1450	933.333	1016.67	1200
	27.58	1333.33	916.667	983.333	1166.67
	27.59	1200	1116.67	1066.67	1133.33
	27.6	1200	1083.33	1016.67	1066.67
	27.61	1133.33	1033.33	883.333	1066.67
	27.62	1100	933.333	800	1116.67
	27.63	1116.67	933.333	833.333	1200
	27.64	1050	1050	983.333	1250
	27.65	1050	966.667	1066.67	1233.33
	27.66	1133.33	816.667	950	1100
	27.67	1216.67	700	866.667	1233.33
	27.68	1183.33	900	816.667	1266.67
	27.69	1216.67	866.667	883.333	1383.33
	27.7	1200	933.333	983.333	1216.67
	27.71	1183.33	1000	866.667	1250
	27.72	1333.33	983.333	800	1516.67
	27.73	1116.67	1183.33	800	1616.67
	27.74	1100	1016.67	883.333	1350
	27.75	1150	933.333	916.667	1283.33
	27.76	1250	966.667	866.667	1416.67
	27.77	1333.33	950	1033.33	1450
	27.78	1366.67	1016.67	1083.33	1600
	27.79	1133.33	1100	983.333	1683.33
	27.8	1150	1000	883.333	1566.67
	27.81	1166.67	816.667	916.667	1566.67
	27.82	1150	850	916.667	1316.67
	27.83	1183.33	883.333	1033.33	1350
	27.84	1350	916.667	1066.67	1200
	27.85	1216.67	966.667	866.667	1433.33
	27.86	1233.33	983.333	916.667	1483.33
	27.87	1133.33	933.333	916.667	1266.67
	27.88	1250	1116.67	883.333	1316.67
	27.89	1200	983.333	983.333	1183.33
	27.9	1300	1050	850	1250
	27.91	1333.33	933.333	800	1333.33
	27.92	1216.67	866.667	900	1300
	27.93	1133.33	850	816.667	1150
	27.94	1150	883.333	933.333	1283.33
	27.95	1233.33	883.333	916.667	1166.67
	27.96	1266.67	883.333	866.667	1033.33
	27.97	1300	900	833.333	1100
	27.98	1266.67	1066.67	900	1033.33
	27.99	1200	1116.67	966.667	933.333
	28	1166.67	1100	916.667	1116.67
	28.01	1350	1050	983.333	1233.33
	28.02	1300	966.667	983.333	1033.33
	28.03	1183.33	933.333	983.333	1066.67
	28.04	1233.33	1033.33	933.333	1133.33
	28.05	1400	1066.67	983.333	1033.33
	28.06	1200	933.333	883.333	1016.67
	28.07	1150	850	966.667	1150
	28.08	1200	966.667	1016.67	950
	28.09	1333.33	916.667	1050	1016.67
	28.1	1366.67	833.333	1016.67	1066.67
	28.11	1283.33	1083.33	833.333	1066.67
	28.12	1316.67	1183.33	850	1083.33
	28.13	1383.33	1050	916.667	1133.33
	28.14	1200	1116.67	900	1100
	28.15	1250	1083.33	933.333	1233.33
	28.16	1233.33	1033.33	800	1050
	28.17	1350	966.667	766.667	1083.33
	28.18	1283.33	1050	800	1233.33
	28.19	1116.67	1083.33	950	1200
	28.2	1166.67	1016.67	1100	1183.33
	28.21	1083.33	916.667	1050	1016.67
	28.22	1200	916.667	1050	1200
	28.23	1266.67	966.667	950	1150
	28.24	1233.33	983.333	966.667	1100
	28.25	1200	983.333	833.333	1300
	28.26	1200	916.667	883.333	1250
	28.27	1083.33	850	1050	1200
	28.28	1233.33	983.333	916.667	1083.33
	28.29	1450	1016.67	883.333	1216.67
	28.3	1283.33	916.667	883.333	1216.67
	28.31	1300	766.667	1083.33	1150
	28.32	1350	866.667	883.333	1083.33
	28.33	1250	1016.67	866.667	1033.33
	28.34	1166.67	950	916.667	933.333
	28.35	1166.67	900	1100	833.333
	28.36	1200	933.333	1016.67	1016.67
	28.37	1166.67	1050	950	1100
	28.38	1050	983.333	966.667	1066.67
	28.39	1066.67	916.667	1016.67	1050
	28.4	1183.33	933.333	966.667	1016.67
	28.41	1200	933.333	983.333	1016.67
	28.42	1166.67	950	966.667	1116.67
	28.43	1166.67	866.667	933.333	1283.33
	28.44	1233.33	883.333	900	1033.33
	28.45	1366.67	1133.33	900	900
	28.46	1400	1200	800	1066.67
	28.47	1266.67	1116.67	1033.33	1133.33
	28.48	1166.67	1050	916.667	1083.33
	28.49	1183.33	983.333	883.333	966.667
	28.5	1033.33	866.667	916.667	950
	28.51	1216.67	966.667	866.667	816.667
	28.52	1166.67	1066.67	933.333	866.667
	28.53	1116.67	983.333	900	983.333
	28.54	1216.67	833.333	933.333	1033.33
	28.55	1133.33	916.667	916.667	1033.33
	28.56	1216.67	933.333	883.333	1016.67
	28.57	1250	950	1016.67	1183.33
	28.58	1166.67	983.333	1050	1133.33
	28.59	1183.33	950	950	1016.67
	28.6	1233.33	883.333	966.667	950
	28.61	1300	833.333	883.333	1000
	28.62	1283.33	900	966.667	1050
	28.63	1200	1016.67	1050	1033.33
	28.64	1300	1000	1050	1066.67
	28.65	1300	1033.33	883.333	1083.33
	28.66	1216.67	933.333	900	1033.33
	28.67	1183.33	1000	850	1083.33
	28.68	1150	983.333	800	1133.33
	28.69	1300	1016.67	933.333	1100
	28.7	1366.67	1133.33	933.333	983.333
	28.71	1350	1066.67	900	950
	28.72	1216.67	1016.67	883.333	850
	28.73	1133.33	950	850	1033.33
	28.74	1216.67	833.333	816.667	1033.33
	28.75	1200	850	866.667	1033.33
	28.76	1216.67	933.333	1000	1033.33
	28.77	1166.67	1033.33	966.667	1133.33
	28.78	1216.67	1133.33	1050	1183.33
	28.79	1483.33	1050	1100	1183.33
	28.8	1533.33	1066.67	1066.67	1083.33
	28.81	1216.67	1066.67	1050	950
	28.82	1250	950	1000	933.333
	28.83	1250	783.333	866.667	900
	28.84	1183.33	900	800	850
	28.85	1133.33	1033.33	866.667	983.333
	28.86	1083.33	1100	916.667	1016.67
	28.87	1100	1066.67	1016.67	916.667
	28.88	1116.67	1083.33	1116.67	983.333
	28.89	1116.67	933.333	1033.33	1166.67
	28.9	1000	850	866.667	1216.67
	28.91	1116.67	1050	766.667	950
	28.92	1100	1066.67	916.667	966.667
	28.93	1216.67	1016.67	883.333	1250
	28.94	1100	950	900	1133.33
	28.95	1150	766.667	750	966.667
	28.96	1150	816.667	800	1100
	28.97	1116.67	933.333	983.333	1016.67
	28.98	1183.33	1050	1050	1166.67
	28.99	1183.33	950	950	1133.33
	29	1150	850	833.333	1150
	29.01	1183.33	900	933.333	1033.33
	29.02	1116.67	850	950	950
	29.03	1066.67	866.667	900	850
	29.04	1133.33	883.333	916.667	1000
	29.05	1333.33	1016.67	916.667	1066.67
	29.06	1350	1133.33	983.333	1083.33
	29.07	1266.67	1083.33	1050	1116.67
	29.08	1200	983.333	1000	1016.67
	29.09	1050	883.333	933.333	1083.33
	29.1	950	933.333	833.333	1183.33
	29.11	1000	866.667	816.667	1166.67
	29.12	1100	1033.33	816.667	1083.33
	29.13	1150	1000	883.333	983.333
	29.14	1116.67	1000	866.667	1050
	29.15	1166.67	933.333	900	983.333
	29.16	1100	950	866.667	950
	29.17	1216.67	983.333	883.333	1016.67
	29.18	1200	966.667	933.333	1000
	29.19	1233.33	1016.67	783.333	1050
	29.2	1333.33	1050	816.667	983.333
	29.21	1266.67	966.667	933.333	933.333
	29.22	1183.33	900	866.667	1133.33
	29.23	1200	916.667	883.333	1133.33
	29.24	1183.33	950	933.333	1183.33
	29.25	1133.33	983.333	1033.33	1133.33
	29.26	1200	916.667	1033.33	966.667
	29.27	1266.67	916.667	950	1000
	29.28	1216.67	1033.33	866.667	1150
	29.29	1216.67	1016.67	866.667	1083.33
	29.3	1183.33	966.667	916.667	1116.67
	29.31	1183.33	916.667	816.667	1116.67
	29.32	1166.67	916.667	916.667	1033.33
	29.33	1183.33	950	950	1000
	29.34	1183.33	950	1016.67	833.333
	29.35	1233.33	933.333	900	900
	29.36	1433.33	983.333	950	1016.67
	29.37	1416.67	916.667	1000	1033.33
	29.38	1083.33	950	883.333	1050
	29.39	1016.67	966.667	916.667	1000
	29.4	1033.33	966.667	950	966.667
	29.41	1066.67	916.667	1016.67	950
	29.42	1033.33	966.667	966.667	850
	29.43	1233.33	1033.33	900	833.333
	29.44	1250	1033.33	1000	866.667
	29.45	1266.67	1016.67	1033.33	816.667
	29.46	1200	950	900	783.333
	29.47	1150	833.333	866.667	850
	29.48	1183.33	866.667	950	933.333
	29.49	1216.67	1000	966.667	900
	29.5	1233.33	966.667	950	1016.67
	29.51	1183.33	933.333	1016.67	1050
	29.52	1100	883.333	966.667	966.667
	29.53	1200	816.667	933.333	1000
	29.54	1216.67	833.333	883.333	1016.67
	29.55	1233.33	983.333	950	1000
	29.56	1283.33	966.667	950	766.667
	29.57	1100	866.667	933.333	850
	29.58	1100	1016.67	933.333	883.333
	29.59	1166.67	950	950	1033.33
	29.6	1083.33	900	933.333	1133.33
	29.61	1133.33	750	983.333	1116.67
	29.62	1150	716.667	933.333	983.333
	29.63	1066.67	733.333	966.667	950
	29.64	1133.33	816.667	1000	866.667
	29.65	1150	933.333	850	916.667
	29.66	1216.67	866.667	833.333	1133.33
	29.67	1216.67	783.333	916.667	1050
	29.68	1150	850	950	966.667
	29.69	1116.67	950	1066.67	966.667
	29.7	1150	1050	933.333	983.333
	29.71	1166.67	1150	916.667	966.667
	29.72	1150	1100	1000	1000
	29.73	1250	933.333	1033.33	883.333
	29.74	1300	866.667	1050	933.333
	29.75	1166.67	850	983.333	966.667
	29.76	933.333	850	933.333	1016.67
	29.77	1000	966.667	916.667	1050
	29.78	1133.33	950	816.667	1050
	29.79	1166.67	1033.33	850	1066.67
	29.8	1183.33	950	850	933.333
	29.81	1150	900	1033.33	833.333
	29.82	1283.33	950	1066.67	1000
	29.83	1316.67	1033.33	933.333	1133.33
	29.84	1166.67	1100	950	1050
	29.85	1233.33	1133.33	1116.67	1016.67
	29.86	1266.67	933.333	1150	1083.33
	29.87	1216.67	866.667	1066.67	1166.67
	29.88	1183.33	950	1100	1116.67
	29.89	1233.33	966.667	1133.33	1050
	29.9	1133.33	933.333	1066.67	1016.67
	29.91	1066.67	1016.67	933.333	966.667
	29.92	1183.33	1000	966.667	983.333
	29.93	1216.67	1016.67	1050	1150
	29.94	1100	1000	933.333	1083.33
	29.95	1116.67	966.667	966.667	966.667
	29.96	1033.33	916.667	916.667	883.333
	29.97	1016.67	800	866.667	983.333
[truncated: 5,003 more rows]

## Sheet: Figure 1_B
		Kubelka-Munk Function / -
	Wavelength / nm	a	b	d	c
	1500	0.0592046	0.0834999	0.0238674	0.0136324
	1499	0.0591813	0.0834835	0.0238185	0.0136465
	1498	0.0591312	0.0834299	0.0238202	0.013637
	1497	0.0590662	0.0834137	0.0237762	0.0136173
	1496	0.0590777	0.0834471	0.0237715	0.0135899
	1495	0.0591173	0.0834381	0.0237507	0.0135908
	1494	0.0590978	0.0833252	0.0237588	0.0135556
	1493	0.0590937	0.0833288	0.0237606	0.0135361
	1492	0.0590755	0.0833044	0.0237434	0.0135439
	1491	0.0589879	0.0831281	0.0237312	0.0135424
	1490	0.0590051	0.083078	0.0236889	0.0135551
	1489	0.0589841	0.0829086	0.0236517	0.0135172
	1488	0.0589023	0.0827934	0.0236482	0.0135088
	1487	0.0589352	0.082867	0.0236666	0.0135176
	1486	0.0589303	0.0829216	0.023647	0.013506
	1485	0.05882	0.0828742	0.0236491	0.0134937
	1484	0.0588496	0.0828822	0.0236413	0.0134926
	1483	0.0587945	0.0826782	0.0236179	0.0134706
	1482	0.0588632	0.0825857	0.0235665	0.0134585
	1481	0.0588853	0.0827454	0.0235307	0.0134326
	1480	0.0588218	0.082606	0.023506	0.0134384
	1479	0.0586535	0.0825563	0.0235203	0.0134395
	1478	0.058473	0.082477	0.0235046	0.0134429
	1477	0.058451	0.0822485	0.0234923	0.0134221
	1476	0.0584277	0.082256	0.0234679	0.0134453
	1475	0.0585783	0.0822271	0.0234545	0.0134449
	1474	0.0585718	0.0821147	0.0234642	0.0134402
	1473	0.0585606	0.0820578	0.0234596	0.0134047
	1472	0.0584988	0.0818547	0.0234365	0.0133815
	1471	0.0584568	0.0818562	0.0234049	0.0133635
	1470	0.0584914	0.0818547	0.0233899	0.0133705
	1469	0.0585554	0.0819275	0.0233955	0.0133875
	1468	0.0586229	0.082124	0.0233965	0.0133775
	1467	0.0585627	0.0820716	0.0233826	0.0133597
	1466	0.0584674	0.0819409	0.0233468	0.0133411
	1465	0.0583885	0.0817347	0.023318	0.0133278
	1464	0.0583445	0.0816478	0.0233271	0.0132956
	1463	0.0583134	0.0815867	0.0232977	0.0132803
	1462	0.0582806	0.0815315	0.0232679	0.0132846
	1461	0.0582613	0.0815409	0.0232347	0.0133056
	1460	0.058263	0.0815118	0.0232297	0.0132911
	1459	0.0582514	0.0815352	0.0232223	0.0132642
	1458	0.0581176	0.0815364	0.0232279	0.0132397
	1457	0.0579727	0.0814403	0.0232233	0.0132189
	1456	0.0579427	0.0813279	0.023189	0.0132125
	1455	0.0578935	0.0812381	0.0231957	0.0132174
	1454	0.0579795	0.0810705	0.0231534	0.0132146
	1453	0.0580189	0.0810846	0.0231336	0.0132128
	1452	0.0579238	0.0810478	0.0231396	0.0132093
	1451	0.0579717	0.0809956	0.0231349	0.0132146
	1450	0.057939	0.0809885	0.0231381	0.0132075
	1449	0.057932	0.080899	0.0231409	0.0131714
	1448	0.057972	0.0808607	0.0231328	0.0131351
	1447	0.0578168	0.0806374	0.0231478	0.0131232
	1446	0.0578066	0.0806692	0.0231117	0.0131099
	1445	0.0577362	0.0806363	0.0230596	0.0131135
	1444	0.0576833	0.0805879	0.0230542	0.0131094
	1443	0.0577304	0.0805908	0.0230048	0.0131139
	1442	0.0576015	0.0804232	0.0230032	0.0131136
	1441	0.0575595	0.0803354	0.022966	0.0131232
	1440	0.057456	0.0801911	0.0229836	0.0131244
	1439	0.0573804	0.080085	0.0229882	0.0131387
	1438	0.0574856	0.0801297	0.0230186	0.0131354
	1437	0.0574278	0.0800376	0.0230164	0.0131374
	1436	0.0574584	0.0799992	0.0229836	0.013125
	1435	0.0574395	0.080062	0.0229634	0.0131218
	1434	0.0574147	0.0800002	0.0229602	0.0131267
	1433	0.0574305	0.079959	0.0229716	0.0131106
	1432	0.0573209	0.0799438	0.022975	0.0131009
	1431	0.0572968	0.0799482	0.0229845	0.0130935
	1430	0.0572552	0.0797488	0.0229641	0.0131014
	1429	0.0573069	0.0797558	0.0229443	0.0131223
	1428	0.057407	0.0797147	0.0229557	0.0131233
	1427	0.0574701	0.0796169	0.0229772	0.0131166
	1426	0.057405	0.0797681	0.0229925	0.0131264
	1425	0.0573681	0.0797912	0.0230028	0.0131507
	1424	0.0574289	0.0798119	0.023027	0.0131662
	1423	0.057369	0.0797918	0.0230274	0.0131809
	1422	0.057375	0.0796742	0.0230368	0.0132072
	1421	0.0574642	0.0796228	0.0230718	0.0132114
	1420	0.0574511	0.0795338	0.023094	0.0132351
	1419	0.0574426	0.0794398	0.0231615	0.0132495
	1418	0.0576043	0.0794921	0.0231713	0.0132793
	1417	0.0575441	0.0794883	0.0232095	0.0133051
	1416	0.0576033	0.0795625	0.0232301	0.0133269
	1415	0.0577501	0.0796134	0.0232801	0.0133532
	1414	0.0577318	0.079581	0.0233335	0.0133754
	1413	0.0579105	0.0796145	0.0234152	0.0134052
	1412	0.0580673	0.0796224	0.0235064	0.0134471
	1411	0.0581985	0.0797324	0.0235979	0.0134696
	1410	0.0583618	0.0797992	0.0236818	0.0135447
	1409	0.0584953	0.0798719	0.0237706	0.0135919
	1408	0.0585074	0.0798501	0.0238794	0.0136606
	1407	0.0586537	0.0798247	0.0239549	0.0137046
	1406	0.0588592	0.079867	0.0240484	0.013831
	1405	0.0589877	0.0797903	0.0241647	0.0139362
	1404	0.0591681	0.0798686	0.0242865	0.0140071
	1403	0.0593435	0.0799043	0.0244045	0.0140551
	1402	0.059495	0.0799942	0.0245199	0.0141322
	1401	0.0597762	0.0802409	0.0246708	0.0142227
	1400	0.0600279	0.0803469	0.0248131	0.0143179
	1399	0.060309	0.0805818	0.0249542	0.014392
	1398	0.0605227	0.080745	0.0251139	0.0144657
	1397	0.0606469	0.0807525	0.0252399	0.0145736
	1396	0.0608709	0.0808964	0.0253617	0.0146684
	1395	0.0609245	0.08085	0.0254561	0.0147668
	1394	0.0610976	0.0808119	0.0255099	0.0148153
	1393	0.061217	0.0808145	0.0255869	0.0148826
	1392	0.0612895	0.0808092	0.025641	0.0149106
	1391	0.0614118	0.0809048	0.0256948	0.0149294
	1390	0.0614475	0.0809327	0.0257186	0.0148936
	1389	0.0613917	0.0809124	0.0257366	0.0148929
	1388	0.0613064	0.0808701	0.0257343	0.0148879
	1387	0.061188	0.0807785	0.0256454	0.0148698
	1386	0.0610619	0.0806357	0.025581	0.0148058
	1385	0.0609979	0.0804684	0.0254955	0.0147308
	1384	0.0608292	0.0802023	0.0253393	0.0146424
	1383	0.0605802	0.0799276	0.0251829	0.0145229
	1382	0.0602054	0.0797003	0.0249823	0.0143831
	1381	0.0597612	0.079433	0.0248202	0.0142325
	1380	0.0593686	0.0792306	0.0246002	0.0140545
	1379	0.0589627	0.0790519	0.024371	0.0138937
	1378	0.0585208	0.0787823	0.0241205	0.013732
	1377	0.0581152	0.0784408	0.0238798	0.0135699
	1376	0.0576094	0.0781318	0.0236564	0.0134195
	1375	0.0571238	0.0777596	0.0234229	0.0132361
	1374	0.0567353	0.0774482	0.0232095	0.0130774
	1373	0.056329	0.0772538	0.0229635	0.0129233
	1372	0.0559931	0.0769204	0.0227521	0.0127642
	1371	0.0556213	0.0766035	0.0225341	0.012612
	1370	0.0552151	0.0763356	0.0223173	0.0124686
	1369	0.0547714	0.0759774	0.0221311	0.0123603
	1368	0.054368	0.0757646	0.0219264	0.012233
	1367	0.0540291	0.0755084	0.021815	0.0121349
	1366	0.0537464	0.0753405	0.0216638	0.0120206
	1365	0.0535784	0.0751904	0.0215374	0.0119448
	1364	0.0534087	0.0749094	0.0214189	0.0118697
	1363	0.0532315	0.0747372	0.0213049	0.0118126
	1362	0.0531431	0.0745666	0.0211739	0.0117511
	1361	0.0529827	0.0744068	0.0210852	0.0116977
	1360	0.052793	0.0743628	0.0210069	0.0116488
	1359	0.0526556	0.0742577	0.0209398	0.0115982
	1358	0.0524811	0.0740862	0.0208726	0.0115498
	1357	0.0524152	0.0740726	0.0208265	0.0115266
	1356	0.0523504	0.0739558	0.0207689	0.0114985
	1355	0.0523556	0.0739384	0.0207047	0.0114811
	1354	0.0523127	0.0738392	0.0206709	0.0114685
	1353	0.0522572	0.0737524	0.0206489	0.0114469
	1352	0.052243	0.0737111	0.0206509	0.0114291
	1351	0.0521271	0.0735287	0.0206163	0.0113808
	1350	0.0519862	0.0734966	0.0206128	0.0113486
	1349	0.0518655	0.0733722	0.0205636	0.0113253
	1348	0.0517476	0.0732613	0.0205244	0.0113116
	1347	0.0517617	0.0732789	0.0204791	0.0112874
	1346	0.0517747	0.0731936	0.0204434	0.011263
	1345	0.0517853	0.0731284	0.0204397	0.0112529
	1344	0.051718	0.0731117	0.020417	0.0112418
	1343	0.0515792	0.0729758	0.0204001	0.011225
	1342	0.051525	0.0729613	0.0203734	0.0111891
	1341	0.0513724	0.0729046	0.0203346	0.0111524
	1340	0.0513452	0.0728605	0.0203074	0.0111274
	1339	0.0513396	0.0728331	0.0203101	0.0110941
	1338	0.0512032	0.0727183	0.0202705	0.0110652
	1337	0.0511632	0.0726001	0.0202396	0.0110414
	1336	0.051116	0.0725138	0.0201944	0.011023
	1335	0.0509832	0.0724205	0.0201788	0.0109993
	1334	0.050977	0.0723992	0.0201457	0.0109852
	1333	0.0509254	0.072407	0.0201123	0.0109504
	1332	0.0508031	0.0722995	0.0200819	0.010924
	1331	0.0507708	0.0722309	0.0200742	0.010896
	1330	0.0506462	0.0720973	0.0200571	0.0108723
	1329	0.0505588	0.0720472	0.0200263	0.0108552
	1328	0.0505212	0.0719992	0.0200052	0.0108388
	1327	0.0504789	0.0719544	0.0199759	0.010829
	1326	0.050457	0.0719328	0.0199459	0.0108239
	1325	0.0503886	0.0718707	0.019918	0.0108084
	1324	0.0503423	0.0718133	0.0198687	0.0107912
	1323	0.0502502	0.0717717	0.0198694	0.010761
	1322	0.0502021	0.0716662	0.0198354	0.0107511
	1321	0.0501623	0.0715723	0.0198371	0.0107385
	1320	0.0501081	0.0714871	0.0198263	0.0107156
	1319	0.0500292	0.0713664	0.0197785	0.0107068
	1318	0.0499933	0.0713292	0.0197748	0.0107057
	1317	0.0499302	0.071276	0.0197482	0.0106913
	1316	0.0498726	0.071213	0.0197356	0.0106491
	1315	0.0498039	0.071177	0.0197016	0.0106253
	1314	0.0496572	0.0710857	0.0196676	0.0105916
	1313	0.0495901	0.0708927	0.0196525	0.0105849
	1312	0.0495772	0.0708519	0.0196442	0.0105649
	1311	0.0495246	0.0707929	0.0196337	0.0105431
	1310	0.0495709	0.0707806	0.019602	0.0105111
	1309	0.049555	0.0708192	0.01959	0.0105026
	1308	0.0494246	0.0707551	0.0195646	0.0104914
	1307	0.0494826	0.0707321	0.0195772	0.0104759
	1306	0.0494231	0.070728	0.0195578	0.0104599
	1305	0.0494103	0.0706905	0.0195459	0.0104425
	1304	0.0494338	0.0706983	0.0194981	0.0104316
	1303	0.0493259	0.0706485	0.0195031	0.0104193
	1302	0.0492957	0.0705175	0.0194918	0.0104014
	1301	0.0491793	0.0704789	0.0194861	0.0103913
	1300	0.0490708	0.0702974	0.0194714	0.0103754
	1299	0.0490433	0.0702526	0.0194352	0.0103558
	1298	0.0489403	0.0702521	0.0194161	0.0103346
	1297	0.0488858	0.070196	0.0194225	0.0103198
	1296	0.0489091	0.0702108	0.0194145	0.0103092
	1295	0.0488053	0.0700925	0.0193944	0.0102847
	1294	0.0488424	0.0700814	0.0193656	0.0102797
	1293	0.0488338	0.0700822	0.0193659	0.0102799
	1292	0.0487598	0.0700706	0.0193483	0.0102827
	1291	0.0487458	0.0701085	0.0193355	0.010259
	1290	0.0486428	0.0699117	0.0193328	0.0102381
	1289	0.0485845	0.0698566	0.0192963	0.010226
	1288	0.0485594	0.069781	0.0192877	0.0102173
	1287	0.0485571	0.0697358	0.0192599	0.0102153
	1286	0.0485471	0.0697361	0.0192578	0.0101916
	1285	0.0485574	0.0695907	0.0192479	0.0101808
	1284	0.0484892	0.0695086	0.0192429	0.0101607
	1283	0.0483712	0.0693306	0.0192106	0.0101388
	1282	0.0482936	0.0692526	0.0191963	0.0101252
	1281	0.0482384	0.0692593	0.0191926	0.010118
	1280	0.0482145	0.0692071	0.0191873	0.0101123
	1279	0.0482475	0.0692991	0.0191799	0.0100949
	1278	0.0482298	0.0692803	0.0191678	0.0100887
	1277	0.0481804	0.0692029	0.0191622	0.0100741
	1276	0.0481276	0.0691118	0.0191599	0.0100645
	1275	0.0480589	0.06895	0.0191619	0.0100512
	1274	0.0480287	0.0689098	0.019149	0.0100378
	1273	0.048025	0.0688583	0.0191431	0.0100297
	1272	0.0480118	0.068844	0.0191472	0.0100248
	1271	0.0479317	0.0688002	0.0191262	0.01001
	1270	0.0478909	0.0686813	0.0190943	0.0100027
	1269	0.0478195	0.0686089	0.0190914	0.00998228
	1268	0.0477701	0.0685509	0.0190754	0.0099933
	1267	0.047788	0.0684942	0.0190894	0.00997246
	1266	0.0477626	0.0685411	0.0190801	0.00996065
	1265	0.0477686	0.0684929	0.0190797	0.00993753
	1264	0.0477317	0.0684633	0.0190771	0.00992745
	1263	0.0477169	0.0684933	0.019072	0.00991492
	1262	0.0477494	0.068467	0.0190771	0.00991572
	1261	0.0476672	0.0684289	0.0190731	0.00989936
	1260	0.04762	0.0683252	0.0190802	0.00989905
	1259	0.0475599	0.0681564	0.0190831	0.00990071
	1258	0.0474431	0.0680515	0.0190759	0.00988475
	1257	0.0474231	0.0680121	0.0190605	0.00987954
	1256	0.0473888	0.0679752	0.0190413	0.00984832
	1255	0.0473549	0.0679453	0.0190186	0.00983139
	1254	0.0473636	0.067902	0.0190089	0.00982803
	1253	0.0473422	0.0678564	0.0190114	0.00981768
	1252	0.0473185	0.0678231	0.0189974	0.00980836
	1251	0.0472685	0.0677685	0.0189831	0.00977735
	1250	0.0471561	0.0677295	0.0189558	0.00977398
	1249	0.0470656	0.0676345	0.0189583	0.00974723
	1248	0.0469876	0.0675894	0.0189384	0.00972532
	1247	0.0469696	0.0676074	0.0189447	0.00971332
	1246	0.0469557	0.0675199	0.0189363	0.00971213
	1245	0.0469369	0.067495	0.0189092	0.00970385
	1244	0.0468962	0.0674866	0.018899	0.00968982
	1243	0.0468184	0.0674608	0.0188675	0.00966936
	1242	0.0468026	0.0673942	0.0188365	0.00964245
	1241	0.0467825	0.067329	0.018806	0.00963954
	1240	0.0467802	0.0672841	0.0188063	0.00962212
	1239	0.0468014	0.0672105	0.018805	0.00961004
	1238	0.0467006	0.0671787	0.0187881	0.00958875
	1237	0.0465877	0.0671843	0.0187784	0.00956187
	1236	0.0465245	0.0670932	0.0187613	0.0095443
	1235	0.0463969	0.066986	0.0187467	0.00952494
	1234	0.0463217	0.0669037	0.0187037	0.00950363
	1233	0.0463368	0.0668326	0.018676	0.0094812
	1232	0.0462098	0.0667438	0.0186615	0.0094642
	1231	0.046132	0.0666973	0.0186505	0.00943512
	1230	0.0460788	0.0666279	0.0186481	0.00941673
	1229	0.0459975	0.0665116	0.0186339	0.00939873
	1228	0.0459877	0.066494	0.01862	0.00938215
	1227	0.0459497	0.0664171	0.0185893	0.00938418
	1226	0.0459126	0.0663859	0.0185729	0.00937421
	1225	0.0458441	0.0663605	0.0185561	0.00936278
	1224	0.045773	0.0662779	0.0185522	0.00933805
	1223	0.0457099	0.0662625	0.0185267	0.00931611
	1222	0.0456711	0.0662071	0.0185068	0.00928724
	1221	0.0456604	0.0661764	0.0184988	0.00926456
	1220	0.0456666	0.0661826	0.0184875	0.00924572
	1219	0.0456147	0.0660848	0.0184845	0.00924003
	1218	0.0455622	0.0660221	0.0184727	0.00922568
	1217	0.0454821	0.0659557	0.0184644	0.00920225
	1216	0.0453944	0.0658707	0.0184301	0.00918794
	1215	0.0454001	0.0657832	0.0184358	0.00917144
	1214	0.0453412	0.0657507	0.0184163	0.00915665
	1213	0.0453134	0.0657169	0.0184092	0.00915384
	1212	0.0452522	0.0655769	0.0183817	0.00914713
	1211	0.0451573	0.0655772	0.0183905	0.00913334
	1210	0.0451398	0.0655329	0.0183844	0.00910526
	1209	0.0450859	0.065463	0.0183767	0.00908036
	1208	0.0450518	0.065486	0.0183631	0.00906287
	1207	0.0450562	0.065445	0.0183527	0.00904772
	1206	0.0449846	0.065364	0.0183517	0.00903306
	1205	0.0449363	0.0653558	0.0183475	0.00901111
	1204	0.0448437	0.0652751	0.0183359	0.00900384
	1203	0.0447518	0.0652105	0.018328	0.00898821
	1202	0.0447112	0.0651851	0.0183166	0.00897504
	1201	0.044671	0.0651193	0.0183102	0.00897475
	1200	0.0447507	0.0649429	0.0183025	0.00895444
	1199	0.0446887	0.0649139	0.0182821	0.00892921
	1198	0.0446668	0.0648748	0.0182714	0.00891686
	1197	0.0446874	0.0648068	0.018257	0.00891717
	1196	0.0446334	0.0647992	0.0182542	0.00890757
	1195	0.0445957	0.0647468	0.0182453	0.00888825
	1194	0.0445539	0.0646854	0.0182347	0.00885842
	1193	0.044477	0.06467	0.0182361	0.00885606
	1192	0.0444429	0.0645467	0.0182268	0.00885746
	1191	0.0444044	0.0645296	0.0182122	0.00884591
	1190	0.0443053	0.0644668	0.0181918	0.00883413
	1189	0.0442597	0.0644008	0.0181852	0.00881854
	1188	0.0441864	0.0643598	0.0181819	0.00881372
	1187	0.0441603	0.0642677	0.0181736	0.00880116
	1186	0.0441563	0.0642111	0.0181523	0.00878272
	1185	0.044105	0.0640995	0.0181329	0.00876296
	1184	0.0440842	0.0640406	0.0181252	0.00873632
	1183	0.044019	0.0640068	0.0180952	0.00872306
	1182	0.0439631	0.0639835	0.0180843	0.00871413
	1181	0.0439222	0.0639951	0.0180655	0.00870372
	1180	0.0438813	0.0639599	0.0180632	0.0086959
	1179	0.0438202	0.0638967	0.01805	0.00867132
	1178	0.0437581	0.0637948	0.0180416	0.0086537
	1177	0.0437478	0.0636989	0.0180281	0.00865095
	1176	0.0437175	0.0636848	0.0180211	0.00863275
	1175	0.0436948	0.0636178	0.018017	0.0086368
	1174	0.043649	0.0635569	0.0180023	0.00861497
	1173	0.0435905	0.0635065	0.0180048	0.00860894
	1172	0.0435245	0.0634395	0.0179836	0.00858849
	1171	0.0435051	0.0634325	0.0179702	0.00858057
	1170	0.043505	0.063434	0.0179456	0.00857584
	1169	0.0434707	0.0634555	0.0179304	0.00857072
	1168	0.0434596	0.0634179	0.0179215	0.00855132
	1167	0.0433574	0.0633531	0.0179358	0.00854016
	1166	0.0432779	0.0632103	0.0179369	0.00852581
	1165	0.0432185	0.0631555	0.017928	0.00851471
	1164	0.0431556	0.0631377	0.0179073	0.0085092
	1163	0.0431119	0.0630735	0.0178859	0.00847845
	1162	0.0430796	0.0631233	0.0178827	0.00846167
	1161	0.0430368	0.0630911	0.0178434	0.00843925
	1160	0.0430049	0.0630164	0.0178462	0.00844764
	1159	0.0430108	0.0629918	0.0178365	0.00844144
	1158	0.0429879	0.0629042	0.0178424	0.00844377
	1157	0.0429124	0.0628417	0.01782	0.00842229
	1156	0.0428296	0.0627719	0.017799	0.00839701
	1155	0.0427572	0.0626712	0.0177979	0.00838502
	1154	0.0426955	0.062618	0.0178029	0.00838015
	1153	0.0427011	0.0625696	0.0177862	0.0083659
	1152	0.0426959	0.0625348	0.0177758	0.00835257
	1151	0.0426433	0.062471	0.0177377	0.00833344
	1150	0.0426206	0.0624073	0.0177383	0.00831981
	1149	0.0426153	0.0623355	0.0177221	0.00832043
	1148	0.0425291	0.062229	0.0177045	0.00830956
	1147	0.0424911	0.0622414	0.017689	0.00830177
	1146	0.0424384	0.0622268	0.0176667	0.00827987
	1145	0.04231	0.0621883	0.0176639	0.00825999
	1144	0.0423205	0.0622112	0.017669	0.0082492
	1143	0.0422907	0.0621434	0.0176555	0.00822907
	1142	0.0422899	0.0621262	0.017634	0.00822093
	1141	0.0422922	0.0620955	0.0176133	0.00821092
	1140	0.0422766	0.0620359	0.0175949	0.00820473
	1139	0.0422107	0.0619529	0.0175972	0.00819076
	1138	0.0421088	0.0618676	0.0175683	0.00817621
	1137	0.042058	0.0617828	0.0175624	0.00815708
	1136	0.0420077	0.0617544	0.0175352	0.00815491
	1135	0.0419828	0.0618208	0.0175233	0.00814465
	1134	0.0419863	0.0617937	0.0175012	0.00813861
	1133	0.0419719	0.0618061	0.0174833	0.00811272
	1132	0.0419175	0.0617869	0.0174543	0.00810347
	1131	0.0418588	0.0616593	0.0174292	0.00808636
	1130	0.0417725	0.0616247	0.0174092	0.00808237
	1129	0.0417113	0.0615585	0.0174067	0.00806028
	1128	0.0416647	0.0615076	0.0174067	0.00803949
	1127	0.0416902	0.0615357	0.0173759	0.00801012
	1126	0.0416665	0.0615092	0.0173666	0.00801112
	1125	0.0416077	0.0614202	0.0173607	0.00800415
	1124	0.0415351	0.0613316	0.0173492	0.0080017
	1123	0.0414408	0.0612528	0.0173309	0.00798779
	1122	0.0413881	0.0611793	0.017314	0.00797069
	1121	0.041405	0.0611759	0.017291	0.00796439
	1120	0.0413598	0.0610817	0.0172797	0.00795904
	1119	0.0413085	0.0610147	0.0172662	0.00794795
	1118	0.0412677	0.0609526	0.0172407	0.00793476
	1117	0.0412134	0.0609514	0.0172116	0.00791101
	1116	0.0412104	0.060979	0.0171868	0.00789363
	1115	0.0411865	0.0609526	0.0171504	0.00787009
	1114	0.0411637	0.0609751	0.0171363	0.00785866
	1113	0.0410756	0.0608865	0.0171335	0.0078459
	1112	0.0410256	0.0607953	0.0171055	0.00784341
	1111	0.0409654	0.0607372	0.0170947	0.00784219
	1110	0.0409083	0.0606661	0.0170697	0.00783603
	1109	0.0408957	0.0606627	0.0170436	0.00782312
	1108	0.0408493	0.060688	0.017036	0.0078112
	1107	0.0408065	0.0606385	0.017019	0.00779073
	1106	0.0407538	0.0605718	0.0169873	0.00777577
	1105	0.0406501	0.0604257	0.0169586	0.00776834
	1104	0.040611	0.060367	0.0169311	0.00775203
	1103	0.0405951	0.0603404	0.0169249	0.00774568
	1102	0.0405014	0.0602722	0.016907	0.00772715
	1101	0.0405066	0.0602715	0.0168861	0.00771019
	1100	0.0404572	0.060251	0.0168477	0.00769924
	1099	0.0404049	0.060196	0.0168237	0.00768281
	1098	0.0404199	0.0601439	0.0167913	0.00767417
	1097	0.0403639	0.0601289	0.016773	0.00765822
	1096	0.0403245	0.0600622	0.0167647	0.00764488
	1095	0.0402957	0.0600671	0.016729	0.00763614
	1094	0.0402401	0.060064	0.0167034	0.00761723
	1093	0.0401982	0.0600265	0.0166747	0.00761109
	1092	0.0401734	0.0599821	0.0166547	0.0075971
	1091	0.040089	0.0599012	0.0166486	0.00759662
	1090	0.0400576	0.0598477	0.0166221	0.00758729
	1089	0.0400064	0.0597772	0.0165972	0.00757585
	1088	0.0399584	0.0597481	0.0165732	0.00756606
	1087	0.0399727	0.0597489	0.0165419	0.00754827
	1086	0.039908	0.0596885	0.0165234	0.00752932
	1085	0.0398759	0.0596475	0.0164941	0.0075145
	1084	0.0397915	0.0595486	0.0164542	0.00750491
	1083	0.0397138	0.0594543	0.0164138	0.00749445
	1082	0.039698	0.0594433	0.0163851	0.00748672
	1081	0.0396764	0.0594176	0.016363	0.00747474
	1080	0.0396454	0.0594062	0.0163531	0.00746572
	1079	0.0395981	0.0593707	0.0163264	0.00745136
	1078	0.0395642	0.0592895	0.0163056	0.00742924
	1077	0.0395069	0.0592545	0.01626	0.00741438
	1076	0.0394595	0.059164	0.0162341	0.00739648
	1075	0.0394224	0.0591632	0.01621	0.00738432
	1074	0.0393653	0.0591231	0.0161711	0.00737489
	1073	0.0393276	0.0590424	0.0161522	0.00736722
	1072	0.0392953	0.0590847	0.0161211	0.00735951
	1071	0.0392951	0.0590088	0.0161015	0.00733627
	1070	0.0392411	0.0589502	0.0160665	0.00732353
	1069	0.039197	0.0588895	0.0160391	0.0073133
	1068	0.0391631	0.0588269	0.0160076	0.0073091
	1067	0.0390671	0.0587428	0.0159855	0.00728696
	1066	0.039029	0.0587402	0.015957	0.00728667
	1065	0.03901	0.0587134	0.0159153	0.00726542
	1064	0.0389786	0.0586624	0.0158825	0.00726546
	1063	0.0389762	0.0586547	0.0158582	0.00725518
	1062	0.0388996	0.0585851	0.0158379	0.00725258
	1061	0.0387979	0.0585755	0.0158087	0.00724636
	1060	0.0387825	0.0584916	0.0157735	0.00722643
	1059	0.0387285	0.0584897	0.0157296	0.00720381
	1058	0.0387637	0.058454	0.0157047	0.00717874
	1057	0.0387382	0.0584063	0.0156687	0.00717253
	1056	0.0386869	0.0584351	0.0156409	0.00715494
	1055	0.0386292	0.0583061	0.015619	0.00715278
	1054	0.0385434	0.0582563	0.0155807	0.00714769
	1053	0.0384795	0.0581685	0.015558	0.00713787
	1052	0.038393	0.0580836	0.0155312	0.00712126
	1051	0.0383232	0.0581106	0.0154996	0.0071011
	1050	0.0382956	0.0580894	0.0154661	0.00709345
	1049	0.0382672	0.0580806	0.0154279	0.0070887
	1048	0.0382225	0.0580454	0.0154002	0.00708208
	1047	0.0382115	0.0579507	0.015377	0.00706301
	1046	0.0381641	0.0579062	0.0153463	0.00705659
	1045	0.0381364	0.0578781	0.0153072	0.00704281
	1044	0.0380696	0.0578215	0.0152836	0.00703388
	1043	0.0380063	0.0578126	0.0152538	0.00700908
	1042	0.0379157	0.0577079	0.015229	0.00699387
	1041	0.0378418	0.0576632	0.0151952	0.00698001
	1040	0.0378454	0.0576135	0.0151606	0.00696607
	1039	0.0378199	0.0575231	0.015129	0.00695277
	1038	0.0378172	0.0575289	0.0151022	0.00693849
	1037	0.0377965	0.0574698	0.0150768	0.0069285
	1036	0.0377483	0.0574517	0.0150347	0.00692648
	1035	0.0376729	0.0574598	0.0150032	0.00692102
	1034	0.0376438	0.0574773	0.0149858	0.00692075
	1033	0.0375947	0.0573908	0.0149607	0.00691326
	1032	0.0375487	0.0573742	0.014927	0.00689964
	1031	0.0375216	0.0573163	0.0148831	0.00688673
	1030	0.0374374	0.0572288	0.0148622	0.00686716
	1029	0.0373843	0.057236	0.0148404	0.006855
	1028	0.0373446	0.0571847	0.0148308	0.00684172
	1027	0.0372492	0.0571211	0.0147945	0.00683674
	1026	0.0372175	0.0571063	0.0147671	0.00682647
	1025	0.037163	0.0570543	0.0147405	0.00681111
	1024	0.0370839	0.0569649	0.0147179	0.00679067
	1023	0.0370781	0.0569496	0.0146853	0.00679293
	1022	0.0370628	0.0568748	0.0146467	0.00679095
	1021	0.0370313	0.0568246	0.0146006	0.00677903
	1020	0.0370039	0.0568116	0.0145705	0.0067564
	1019	0.0369626	0.0567783	0.0145452	0.00673857
	1018	0.0369217	0.0567824	0.014518	0.0067353
	1017	0.03688	0.0567562	0.0144963	0.00673454
	1016	0.0368345	0.0566744	0.0144496	0.00672831
	1015	0.0367924	0.0565973	0.014425	0.00671361
	1014	0.0367131	0.0564849	0.0144049	0.00669804
	1013	0.0366724	0.0564454	0.0143849	0.00667907
	1012	0.0365913	0.0564237	0.0143563	0.00666174
	1011	0.0365241	0.0563287	0.0143088	0.00665069
	1010	0.0365082	0.0563096	0.014282	0.00664745
	1009	0.0364995	0.0562574	0.0142527	0.00662996
	1008	0.0365287	0.056271	0.0142391	0.00662038
	1007	0.0365139	0.0563128	0.0142097	0.00662112
	1006	0.0364644	0.0563059	0.0141885	0.00660569
	1005	0.0364073	0.0562806	0.0141528	0.00659039
	1004	0.0363195	0.0561554	0.0141299	0.00657284
	1003	0.0362959	0.0560325	0.0140843	0.00657364
	1002	0.0362423	0.0559511	0.014046	0.0065695
	1001	0.0361981	0.0558622	0.0140163	0.00655633
	1000	0.0361722	0.0558708	0.0139997	0.00653808
	999	0.0361019	0.0558867	0.0139876	0.00652552
	998	0.0360681	0.0558557	0.0139539	0.0065109
	997	0.0360342	0.0558326	0.0139042	0.00651161
	996	0.0359995	0.0557599	0.0138935	0.00650036
	995	0.0359953	0.0557236	0.0138753	0.00649743
	994	0.0359532	0.055661	0.0138716	0.00648539
	993	0.0358965	0.0556657	0.0138487	0.00647663
	992	0.0358286	0.0556392	0.0138362	0.00647105
	991	0.0357498	0.0555522	0.0138096	0.00645438
	990	0.0356912	0.0555148	0.0137773	0.0064382
	989	0.0356456	0.0554189	0.0137418	0.00642565
	988	0.0356133	0.0553985	0.013702	0.00641177
	987	0.0355765	0.0553678	0.0136715	0.00641092
	986	0.0355222	0.0553025	0.0136541	0.00639862
	985	0.0355066	0.0552738	0.0136378	0.00639199
	984	0.035451	0.0552368	0.0136127	0.00638478
	983	0.0354135	0.0552446	0.0135913	0.00637113
	982	0.0353885	0.0551929	0.013569	0.0063583
	981	0.0353242	0.0550903	0.0135462	0.00634854
	980	0.035341	0.0550247	0.0135451	0.00633852
	979	0.0352901	0.054929	0.0135071	0.00632898
	978	0.0352258	0.0549141	0.0134781	0.0063157
	977	0.0351604	0.0549044	0.0134351	0.00630272
	976	0.0350724	0.054862	0.0134047	0.00629171
	975	0.035022	0.0548	0.0133975	0.00627743
	974	0.0350237	0.0547289	0.0133898	0.0062641
	973	0.0349996	0.0547341	0.0133718	0.00625511
	972	0.0349942	0.0547005	0.0133487	0.00625121
	971	0.0349447	0.0547444	0.0133265	0.00624174
	970	0.0348908	0.0547667	0.013286	0.00623929
	969	0.0348586	0.0546853	0.0132591	0.00622667
	968	0.0347921	0.0546396	0.0132431	0.0062204
	967	0.0348071	0.0545459	0.013237	0.00620457
	966	0.0347787	0.0545128	0.0132221	0.00620366
	965	0.0347076	0.0545024	0.0131877	0.0061931
	964	0.0347149	0.0544772	0.0131804	0.00618239
	963	0.0346547	0.0544349	0.0131615	0.00618022
	962	0.0346006	0.0543698	0.0131524	0.00617174
	961	0.0345614	0.0543438	0.013133	0.0061571
	960	0.0344793	0.0542576	0.0131046	0.00615297
	959	0.0344214	0.0542589	0.0130954	0.00614323
	958	0.0343663	0.0542166	0.0130599	0.00614481
	957	0.0343719	0.0541507	0.0130619	0.00613535
	956	0.0343281	0.0541225	0.0130265	0.00610354
	955	0.0342993	0.0541032	0.0130123	0.00609131
	954	0.0342998	0.0540628	0.0129763	0.00609063
	953	0.0342573	0.0540244	0.0129753	0.00608456
	952	0.034218	0.0539765	0.0129645	0.00608055
	951	0.0342013	0.0539452	0.012946	0.00607355
	950	0.0341445	0.0538708	0.0129127	0.00606491
	949	0.0340711	0.0538506	0.0128778	0.00605355
	948	0.0340084	0.053793	0.01287	0.00603677
	947	0.0339127	0.0537267	0.0128469	0.00602723
	946	0.0338574	0.0537645	0.0128441	0.00600923
	945	0.0338246	0.0537117	0.0128213	0.00600216
	944	0.0337551	0.0536681	0.0128014	0.00599007
	943	0.0337088	0.0535642	0.0127599	0.00598888
	942	0.033669	0.0535458	0.0127209	0.00597167
	941	0.0335792	0.0534907	0.0127003	0.00596508
	940	0.0335609	0.053428	0.0126901	0.00594393
	939	0.0335639	0.0534465	0.0126776	0.005951
	938	0.0335508	0.0533696	0.0126605	0.00593892
	937	0.0335455	0.0533839	0.0126352	0.00591878
	936	0.0335013	0.0533635	0.0126214	0.00590567
	935	0.0334113	0.0533235	0.0125957	0.00590029
	934	0.0333083	0.0531617	0.0125824	0.00589412
	933	0.0332822	0.0531134	0.0125461	0.00586418
	932	0.0332426	0.0531029	0.012533	0.00585288
	931	0.0331981	0.0530718	0.0124871	0.00585159
	930	0.0331229	0.0531271	0.0124701	0.00583027
	929	0.0330715	0.0530567	0.0124447	0.00580881
	928	0.0330062	0.053047	0.012433	0.00578997
	927	0.0330072	0.052992	0.0123945	0.00578573
	926	0.0330041	0.0529883	0.0123808	0.0057895
	925	0.0329065	0.0528875	0.0123473	0.00577537
	924	0.0328499	0.0527637	0.0123372	0.00576024
	923	0.0327831	0.0526913	0.0123189	0.0057463
	922	0.0327246	0.0525927	0.0123044	0.00573294
	921	0.0326722	0.05256	0.0122893	0.00573465
	920	0.0326636	0.0525412	0.0122781	0.00571602
	919	0.0326275	0.052508	0.0122611	0.00570687
	918	0.0325853	0.0524777	0.0122411	0.00569342
	917	0.0325658	0.0524948	0.0122267	0.00567749
	916	0.0324695	0.0524861	0.0122037	0.00567241
	915	0.0324251	0.0524361	0.0121913	0.00566429
	914	0.0323748	0.0523619	0.0121943	0.00566757
	913	0.0323314	0.052337	0.0121592	0.00565884
	912	0.0323526	0.0523196	0.0121257	0.00564273
	911	0.0322465	0.0522938	0.0120996	0.00562812
	910	0.0322448	0.0523192	0.012103	0.0056172
	909	0.0321961	0.052178	0.012091	0.00560279
	908	0.0321042	0.0520702	0.0120659	0.00559731
	907	0.0321509	0.0520298	0.0120255	0.0055955
	906	0.032119	0.0519313	0.0120109	0.00558304
	905	0.0320601	0.0519014	0.0120072	0.00558324
	904	0.0320491	0.0519091	0.0119908	0.00556772
	903	0.031959	0.0517908	0.0119742	0.00554512
	902	0.0318804	0.051822	0.0119334	0.00553136
	901	0.0318829	0.0518918	0.0119285	0.00551972
	900	0.031895	0.0518852	0.0119112	0.00551951
	899	0.0318171	0.0518578	0.0119074	0.00552568
	898	0.0318032	0.0517996	0.0118864	0.00551436
	897	0.0317781	0.0517618	0.011878	0.00550346
	896	0.031658	0.0516711	0.011859	0.00548869
	895	0.0316601	0.0516941	0.0118299	0.00546408
	894	0.0315983	0.0516815	0.0118081	0.00546185
	893	0.0314873	0.0515384	0.0117792	0.00544735
	892	0.0314926	0.0514848	0.0117467	0.00545271
	891	0.031468	0.0514444	0.0117304	0.00542753
	890	0.0313943	0.0513295	0.0117236	0.00542133
	889	0.0314172	0.0513924	0.0117329	0.00542508
	888	0.0313307	0.0513279	0.0116997	0.00542583
	887	0.0312752	0.0512829	0.0116689	0.00542771
	886	0.0312409	0.0512756	0.0116726	0.00540775
	885	0.0311792	0.0511557	0.0116456	0.00541009
	884	0.0311146	0.0511961	0.0116445	0.00540248
	883	0.0310608	0.0511374	0.0116146	0.00539409
	882	0.031037	0.0511302	0.0116184	0.00538017
	881	0.03099	0.0510961	0.0116115	0.00535873
	880	0.0309995	0.051064	0.0116065	0.00533473
	879	0.0309908	0.0510318	0.0115882	0.00533347
	878	0.0309681	0.0509368	0.0115642	0.00532355
	877	0.0309423	0.0509742	0.0115285	0.00530852
	876	0.0308468	0.0508937	0.0114853	0.00529982
	875	0.030822	0.0508567	0.0114657	0.00529789
	874	0.0308202	0.050896	0.0114335	0.00532157
	873	0.0308247	0.050783	0.0114383	0.00532221
	872	0.0307891	0.0507242	0.011432	0.005285
	871	0.0307169	0.0507605	0.0114319	0.0052581
	870	0.0305505	0.0506069	0.0114096	0.00523703
	869	0.0305469	0.0506472	0.0113976	0.00525159
	868	0.0305441	0.0506781	0.0113859	0.00525054
	867	0.0305431	0.0506342	0.0113687	0.00525866
	866	0.0306197	0.0506846	0.0113806	0.0052512
	865	0.0305391	0.0505993	0.0113869	0.00523471
	864	0.0304916	0.050492	0.0113176	0.00522641
	863	0.0304642	0.0503327	0.0112633	0.00520272
	862	0.0303903	0.0502986	0.011247	0.00519921
	861	0.0303502	0.050339	0.011247	0.00517881
	860	0.0304055	0.0503545	0.0112551	0.0051884
	859	0.0302244	0.0503094	0.0112409	0.00519522
	858	0.0301306	0.05021	0.0112601	0.00521695
	857	0.0300012	0.0501053	0.0112229	0.00520339
	856	0.029882	0.0500344	0.0111863	0.00519323
	855	0.0299876	0.0502043	0.0111438	0.00515936
	854	0.0300275	0.0502176	0.0111135	0.00514858
	853	0.0300408	0.0501939	0.0111449	0.00513584
	852	0.0300835	0.0502116	0.0111489	0.00515354
	851	0.0300436	0.0500693	0.0111545	0.00515342
	850	0.0287483	0.0474266	0.0101516	0.00471258
	849	0.0291482	0.0477764	0.0101681	0.00471311
	848	0.0288989	0.0477834	0.0101675	0.00468506
	847	0.0286815	0.0475697	0.0100983	0.00465427
	846	0.0285258	0.0475619	0.0100613	0.00469117
	845	0.0284229	0.0475098	0.0100477	0.0046582
	844	0.0284759	0.0473135	0.0100176	0.00462563
	843	0.0286147	0.0472122	0.0100084	0.00461692
	842	0.0286315	0.0470798	0.0100094	0.004593
	841	0.0284344	0.0468777	0.00998666	0.00462896
	840	0.0285855	0.0472601	0.00997787	0.00460829
	839	0.0284142	0.0472923	0.00995771	0.00460138
	838	0.0282537	0.0473783	0.00995626	0.00460195
	837	0.0283587	0.0473211	0.00995784	0.00459477
	836	0.0281961	0.0471832	0.00993693	0.00460324
	835	0.0281826	0.0470775	0.0099311	0.00458175
	834	0.0282911	0.0469687	0.00993727	0.00460707
	833	0.0282148	0.0469781	0.009888	0.00458839
	832	0.0282269	0.0469916	0.00990745	0.00457906
	831	0.0281689	0.0471129	0.00988321	0.00456802
	830	0.02797	0.0470318	0.00986982	0.00456161
	829	0.0278004	0.0469795	0.0098573	0.00452971
	828	0.0277533	0.0468319	0.00987853	0.00455473
	827	0.0276566	0.0466684	0.00987112	0.00454982
	826	0.0276598	0.0466661	0.00991443	0.00456124
	825	0.0277812	0.0466699	0.00990714	0.0045595
	824	0.0278489	0.0467729	0.00991353	0.00454353
	823	0.0279003	0.046668	0.00989695	0.00454378
	822	0.0279975	0.0468224	0.00990343	0.00454167
	821	0.0279263	0.0467632	0.00987753	0.0045516
	820	0.0277596	0.0466423	0.00985424	0.00456198
	819	0.0278153	0.0467894	0.00985104	0.00458149
	818	0.0278109	0.0467571	0.00986988	0.0045712
	817	0.0278008	0.0467965	0.00991187	0.00458773
	816	0.0278791	0.0469606	0.00993223	0.00456471
	815	0.0278713	0.0468844	0.00992654	0.00455943
	814	0.027822	0.0467662	0.00991742	0.00455921
	813	0.0279121	0.0468877	0.00993655	0.00456235
	812	0.0278654	0.0467761	0.00992031	0.00457909
	811	0.0277869	0.0468519	0.00995873	0.00455488
	810	0.027793	0.046903	0.00989935	0.00455111
	809	0.0276708	0.0467517	0.00990649	0.00454597
	808	0.027702	0.0467176	0.00992239	0.00457686
	807	0.0277567	0.0467101	0.00992351	0.00458417
	806	0.0277496	0.0467177	0.0099284	0.00460738
	805	0.0277849	0.046725	0.00996711	0.0046025
	804	0.0277116	0.046767	0.00997338	0.00460982
	803	0.0276175	0.0466583	0.0099868	0.00462871
	802	0.0275582	0.0467097	0.0099725	0.00462416
	801	0.0276378	0.0469256	0.00996083	0.00463768
	800	0.0276974	0.0469377	0.00996245	0.00462649
	799	0.0276758	0.0468958	0.0099675	0.00462415
	798	0.0276864	0.0468674	0.00997522	0.0046301
	797	0.0276446	0.0468601	0.00999165	0.00465321
	796	0.0276696	0.0468846	0.0100507	0.0046615
	795	0.0277983	0.047023	0.0100572	0.00469135
	794	0.0277618	0.0468705	0.0101079	0.00470945
	793	0.0278074	0.0468259	0.0100951	0.00470375
	792	0.0277957	0.0468455	0.0101102	0.00471893
	791	0.0277901	0.0469543	0.0100964	0.00472258
	790	0.0278582	0.0470781	0.0100818	0.00476035
	789	0.0277853	0.0470651	0.0101166	0.00474985
	788	0.0278153	0.0471333	0.0101149	0.00477016
	787	0.0277445	0.0470062	0.0101707	0.00475581
	786	0.0277952	0.0470849	0.0101961	0.00479483
	785	0.0278793	0.0470856	0.0102219	0.00483568
	784	0.0279537	0.0470378	0.0102931	0.0048476
	783	0.0280244	0.0471143	0.0102927	0.00486048
	782	0.0280983	0.0471406	0.0103041	0.00487304
	781	0.0281067	0.0471513	0.0103	0.00492921
	780	0.0280736	0.0472343	0.0103269	0.00492618
	779	0.0282019	0.0473137	0.0103507	0.0049385
	778	0.0282037	0.0473236	0.0103624	0.00494417
	777	0.0282497	0.0473893	0.0103997	0.00497419
	776	0.0282852	0.0472597	0.010446	0.00499338
	775	0.028276	0.0472049	0.0104893	0.00500035
	774	0.0282816	0.0471602	0.0105179	0.00501469
	773	0.0283265	0.0471751	0.0105356	0.00503827
	772	0.0283786	0.0473334	0.0105752	0.00504842
	771	0.0283569	0.0474103	0.0105603	0.00509059
	770	0.0283702	0.0474992	0.0105987	0.00511055
	769	0.0284337	0.0475101	0.0106392	0.00515068
	768	0.028466	0.0475127	0.0106914	0.00517246
	767	0.0285528	0.0475566	0.0107537	0.00519462
	766	0.0286055	0.047545	0.0107785	0.00520429
	765	0.02857	0.0475612	0.0108296	0.00522492
	764	0.0285782	0.0475891	0.0108841	0.00524976
	763	0.0286383	0.0476209	0.0109325	0.00529263
	762	0.0287754	0.0477356	0.0109887	0.00531688
	761	0.0288516	0.0478975	0.0110249	0.00533159
	760	0.028902	0.0479086	0.0110427	0.00537941
	759	0.028912	0.047975	0.0111018	0.00541709
	758	0.0288446	0.0479485	0.0111745	0.00546343
	757	0.0289298	0.0478918	0.0112374	0.0054902
	756	0.0290237	0.0479732	0.0112902	0.0055371
	755	0.0291675	0.0479977	0.0113464	0.0055617
	754	0.0293665	0.0481529	0.0114091	0.00561568
	753	0.0294371	0.048192	0.0114676	0.00564576
	752	0.0296234	0.0483421	0.0115123	0.00568535
	751	0.0296731	0.048354	0.0115731	0.00571179
	750	0.0296698	0.0483775	0.0116387	0.00576512
	749	0.0297573	0.0484598	0.0117221	0.00580557
	748	0.0297643	0.0484772	0.0118236	0.00585533
	747	0.0297902	0.0485246	0.0119273	0.00590873
	746	0.0298932	0.0485351	0.0120129	0.00594052
	745	0.0299922	0.048611	0.0120827	0.00600105
	744	0.0300138	0.0486322	0.0121607	0.00603785
	743	0.0300884	0.0487358	0.0122459	0.00609084
	742	0.0301157	0.0487773	0.0123377	0.00615953
	741	0.0301218	0.0488065	0.0124191	0.00620591
	740	0.0303989	0.0489944	0.0125443	0.00625884
	739	0.030581	0.0490459	0.0126419	0.00631834
	738	0.0307303	0.0491126	0.0127021	0.00638055
	737	0.0308075	0.0492008	0.0127855	0.00642724
	736	0.0309266	0.0493276	0.0128639	0.0064884
	735	0.0310072	0.0494198	0.0129856	0.00652548
	734	0.031104	0.0495491	0.0130735	0.00660097
	733	0.0311636	0.0495094	0.0132017	0.00665114
	732	0.0312388	0.0495311	0.0133098	0.00671759
	731	0.0312645	0.0495803	0.0134357	0.00677987
	730	0.0313726	0.0497122	0.0135388	0.00686001
	729	0.0315188	0.0499037	0.0136631	0.00692897
	728	0.0316491	0.0499866	0.0137961	0.00700226
	727	0.0318587	0.0501021	0.013943	0.00707251
	726	0.0319701	0.0501229	0.0140671	0.00715331
	725	0.0321561	0.0502346	0.0142117	0.00723295
	724	0.0322984	0.0503804	0.0143493	0.00732038
	723	0.0324203	0.0505606	0.0145021	0.00738766
	722	0.0325662	0.0507014	0.0146292	0.00746286
	721	0.0326609	0.0508263	0.014768	0.00753353
	720	0.0327518	0.0509114	0.0149299	0.00762765
	719	0.032902	0.051004	0.0150798	0.00773459
	718	0.0330323	0.0510934	0.0152514	0.00781755
	717	0.0331708	0.0511958	0.0154174	0.00791854
	716	0.0333696	0.0513074	0.0155965	0.00802061
	715	0.0335464	0.0514398	0.0157739	0.00812142
	714	0.0336964	0.0515429	0.0159612	0.00821158
	713	0.0338526	0.0516689	0.0161643	0.00831733
	712	0.0340319	0.0518137	0.0163326	0.00842832
	711	0.0341844	0.0518577	0.016516	0.00854332
	710	0.0344774	0.0521275	0.0167215	0.00865248
	709	0.0347097	0.0523487	0.0169095	0.00876491
	708	0.0349283	0.0525176	0.0171556	0.00887551
	707	0.0351004	0.052653	0.0173662	0.00900408
	706	0.0352491	0.0527063	0.0176216	0.00913075
	705	0.0354228	0.0527925	0.0178323	0.00926778
	704	0.0356228	0.0529394	0.0180574	0.00940207
	703	0.0358126	0.0531393	0.0182847	0.00952192
	702	0.0360521	0.0533963	0.018542	0.00963012
	701	0.0362395	0.0535482	0.0188106	0.00975727
	700	0.0364873	0.053782	0.0190762	0.0099173
	699	0.0367619	0.0539779	0.0193491	0.0100782
	698	0.0369503	0.0540722	0.0196246	0.0102538
	697	0.0372221	0.0542254	0.0199034	0.0104064
	696	0.037403	0.0543606	0.0201887	0.010549
	695	0.0376545	0.054605	0.020451	0.010686
	694	0.0378922	0.0547889	0.0207598	0.0108459
	693	0.0381753	0.055042	0.0210595	0.0110333
	692	0.0385412	0.0553326	0.0213863	0.0112127
	691	0.0388348	0.0555148	0.0217353	0.0113857
	690	0.039129	0.0557917	0.0220653	0.0115484
	689	0.0393945	0.0560507	0.0224466	0.0117304
	688	0.0395828	0.0562199	0.0228199	0.0119307
	687	0.0398165	0.0564436	0.0231795	0.0121328
	686	0.0400868	0.0567065	0.0235395	0.0123335
	685	0.0403605	0.0568951	0.0239086	0.0125366
	684	0.0406135	0.0571231	0.0242815	0.012748
	683	0.0408756	0.0574077	0.0247116	0.0129609
	682	0.0411814	0.0575985	0.0251265	0.0131663
	681	0.0414584	0.0578768	0.0255362	0.0133906
	680	0.0417144	0.0580977	0.0259223	0.0136418
	679	0.0419586	0.058217	0.0263358	0.0138829
	678	0.0421688	0.0584632	0.0267701	0.014125
	677	0.0424469	0.0586275	0.0272077	0.0143526
	676	0.0427476	0.0588591	0.0277142	0.0146153
	675	0.0429828	0.0591606	0.028215	0.0148905
	674	0.0433541	0.0593564	0.0287677	0.0151843
	673	0.0436743	0.0596297	0.0292951	0.0154786
	672	0.0439723	0.0598235	0.0298145	0.0157745
	671	0.0443995	0.060197	0.0303724	0.0160751
	670	0.044763	0.0605098	0.0309445	0.0164071
	669	0.0450599	0.0608297	0.0315437	0.0167379
	668	0.0454548	0.0612606	0.0321676	0.0171009
	667	0.0458949	0.061523	0.03283	0.0174361
	666	0.0461499	0.0618641	0.0334532	0.0178043
	665	0.0466161	0.0622198	0.0341102	0.0181583
	664	0.0470499	0.0625265	0.0348081	0.0185553
	663	0.04748	0.0629783	0.0355467	0.0189777
	662	0.0479643	0.0633915	0.0363218	0.0193987
	661	0.0483995	0.0637998	0.0370719	0.01982
	660	0.0488853	0.0642421	0.037829	0.0202481
	659	0.0493114	0.0644851	0.0385966	0.020721
	658	0.0498253	0.0648772	0.0394093	0.0211961
	657	0.050341	0.0653396	0.0402452	0.0216667
	656	0.0508118	0.0657764	0.0411187	0.0221259
	655	0.05126	0.0663147	0.0420076	0.0226232
	654	0.0518136	0.0667835	0.0429361	0.0231536
	653	0.0523156	0.0672463	0.043845	0.0237069
	652	0.0528962	0.0677975	0.0447941	0.0242619
	651	0.0535944	0.0683008	0.0457928	0.0248401
	650	0.0541277	0.0688055	0.0468526	0.0254219
	649	0.0546976	0.0692781	0.0479046	0.0260136
	648	0.0552611	0.0697034	0.0489907	0.026643
	647	0.0558318	0.0702137	0.0500599	0.0273286
	646	0.0565198	0.0708365	0.0512044	0.027999
	645	0.0572211	0.0714654	0.0523702	0.0287021
	644	0.0579178	0.0721493	0.0535562	0.0294301
	643	0.0586042	0.072828	0.0548088	0.0301939
	642	0.0592824	0.0734121	0.0560997	0.0309845
	641	0.0600083	0.0740804	0.0574191	0.0317676
	640	0.0607806	0.0747922	0.058761	0.0326017
	639	0.0615941	0.0755162	0.0601333	0.0334577
	638	0.0624577	0.0763108	0.0615888	0.0343624
	637	0.0632561	0.077057	0.0630529	0.0352558
	636	0.0640869	0.0777479	0.0645383	0.0362045
	635	0.0649159	0.078512	0.0660828	0.0371706
	634	0.0657133	0.0792459	0.0677089	0.0381611
	633	0.0666505	0.0800379	0.0693566	0.0391524
	632	0.067603	0.0809461	0.0710527	0.0401767
	631	0.0685654	0.0817744	0.072775	0.0412468
	630	0.0696682	0.0827193	0.0745253	0.0424264
	629	0.0707338	0.0837373	0.0763414	0.0435998
	628	0.0718813	0.0847112	0.0782455	0.0448284
	627	0.0730064	0.0857884	0.0801533	0.0460616
	626	0.0740174	0.0866966	0.082185	0.0474011
	625	0.0751568	0.0877083	0.0842173	0.0487624
	624	0.0762116	0.0887291	0.0863322	0.0502091
	623	0.077403	0.0897888	0.0885626	0.0516874
	622	0.0787163	0.0910664	0.0908445	0.0532205
	621	0.0800483	0.0923326	0.0932093	0.0547906
	620	0.081464	0.0935789	0.0956132	0.0564048
	619	0.0828589	0.0948503	0.0980366	0.0580167
	618	0.0842815	0.0961811	0.100567	0.0597826
	617	0.0856993	0.0974308	0.103203	0.0615754
	616	0.0871807	0.0988012	0.105922	0.0634678
	615	0.0887977	0.100243	0.10871	0.0654121
	614	0.09037	0.101698	0.111529	0.0674111
	613	0.0920296	0.103255	0.114425	0.0694793
	612	0.0938267	0.104907	0.117518	0.0715819
	611	0.0955302	0.106616	0.120702	0.0738039
	610	0.0974203	0.108329	0.124033	0.0761552
	609	0.0993104	0.110122	0.127373	0.0786378
	608	0.10126	0.112025	0.130752	0.0811525
	607	0.103261	0.113817	0.13421	0.0837057
	606	0.10533	0.115733	0.137758	0.0863295
	605	0.107599	0.11776	0.141446	0.0890393
	604	0.109733	0.119725	0.145201	0.0918064
	603	0.112034	0.121883	0.149056	0.094717
	602	0.114507	0.124121	0.153087	0.0977009
	601	0.116804	0.126235	0.1572	0.100825
	600	0.119603	0.128662	0.161703	0.104257
	599	0.122132	0.131014	0.166047	0.107584
	598	0.124694	0.133386	0.170478	0.111036
	597	0.127482	0.136072	0.174959	0.114567
	596	0.130277	0.138733	0.179529	0.118239
	595	0.133144	0.141402	0.184367	0.122029
	594	0.136034	0.144051	0.189299	0.126013
	593	0.138948	0.146703	0.194464	0.130044
	592	0.142082	0.149651	0.199697	0.134199
	591	0.145296	0.152807	0.205005	0.138472
	590	0.14861	0.156041	0.210446	0.142801
	589	0.152005	0.159345	0.216025	0.147378
	588	0.1555	0.16274	0.22173	0.152029
	587	0.159107	0.166	0.227621	0.156988
	586	0.162854	0.169451	0.233653	0.161932
	585	0.166478	0.172889	0.239849	0.167056
	584	0.170363	0.176503	0.246136	0.172343
	583	0.174314	0.18028	0.252604	0.177745
	582	0.178344	0.184207	0.259214	0.183414
	581	0.182718	0.188372	0.266085	0.189248
	580	0.186973	0.192531	0.273124	0.195307
	579	0.191352	0.196789	0.280455	0.20144
	578	0.196077	0.201095	0.287773	0.207813
	577	0.200755	0.205566	0.295337	0.21448
	576	0.205572	0.210148	0.302971	0.221286
	575	0.210659	0.215035	0.31093	0.228286
	574	0.215609	0.219925	0.319246	0.235576
	573	0.220615	0.225024	0.327655	0.243051
	572	0.226134	0.23042	0.336295	0.250767
	571	0.231595	0.235777	0.345048	0.258578
	570	0.23725	0.241441	0.354096	0.266745
	569	0.243176	0.24719	0.363344	0.275191
	568	0.2492	0.252989	0.372916	0.283979
	567	0.25529	0.259105	0.382816	0.292905
	566	0.261776	0.265615	0.39296	0.302234
	565	0.268491	0.272338	0.403333	0.311853
	564	0.275067	0.279202	0.414003	0.321829
	563	0.282055	0.286358	0.42477	0.33175
	562	0.289153	0.29355	0.435819	0.342144
	561	0.296594	0.300988	0.447162	0.352816
	560	0.304135	0.308582	0.458785	0.363984
	559	0.31173	0.31637	0.470963	0.375193
	558	0.319465	0.324426	0.48318	0.386693
	557	0.327282	0.332555	0.495701	0.398433
	556	0.3357	0.341229	0.508467	0.410767
	555	0.344473	0.350209	0.521436	0.423217
	554	0.353592	0.359366	0.53478	0.435944
	553	0.362684	0.368771	0.548247	0.449019
	552	0.371767	0.378215	0.56221	0.462397
	551	0.381061	0.387726	0.576131	0.475999
	550	0.390306	0.397771	0.590546	0.49011
	549	0.399953	0.407981	0.605095	0.504586
	548	0.410156	0.418785	0.620305	0.519561
	547	0.420679	0.429953	0.635729	0.534745
	546	0.431581	0.441131	0.6516	0.550393
	545	0.442759	0.452918	0.667678	0.566365
	544	0.453775	0.464591	0.684163	0.582931
	543	0.464878	0.476751	0.701077	0.599836
	542	0.476503	0.489577	0.718005	0.617058
	541	0.488532	0.502399	0.735369	0.634525
	540	0.50085	0.515675	0.752729	0.652539
	539	0.513402	0.529087	0.77066	0.670782
	538	0.526125	0.542537	0.788801	0.689185
	537	0.539292	0.556793	0.807317	0.707819
	536	0.552953	0.571512	0.826059	0.727159
	535	0.566778	0.586951	0.845451	0.746959
	534	0.58087	0.602377	0.864949	0.767087
	533	0.595253	0.617729	0.884952	0.787537
	532	0.609573	0.633444	0.905139	0.808549
	531	0.625079	0.649519	0.92577	0.830037
	530	0.640859	0.666086	0.946753	0.851893
	529	0.656534	0.683505	0.968084	0.874188
	528	0.672846	0.701414	0.989468	0.896743
	527	0.688834	0.719258	1.01126	0.919959
	526	0.70541	0.737841	1.03317	0.94365
	525	0.722353	0.756647	1.0556	0.967877
	524	0.740148	0.775529	1.07845	0.99231
	523	0.758444	0.795424	1.10138	1.01706
	522	0.776686	0.815673	1.12488	1.04178
	521	0.795708	0.836235	1.14832	1.06682
	520	0.815339	0.858048	1.17387	1.09318
	519	0.834649	0.879032	1.19823	1.11991
	518	0.854733	0.900514	1.22292	1.14698
	517	0.874375	0.922045	1.24756	1.17411
	516	0.894922	0.944526	1.27258	1.20165
	515	0.915848	0.967771	1.2982	1.2296
	514	0.937155	0.991232	1.32385	1.25796
	513	0.959419	1.01555	1.34921	1.28636
	512	0.981254	1.03943	1.37477	1.31499
	511	1.00423	1.06343	1.40133	1.34361
	510	1.02757	1.08834	1.42793	1.37285
	509	1.05062	1.11317	1.45436	1.40244
	508	1.07424	1.13877	1.48022	1.43204
	507	1.09798	1.1645	1.50661	1.46146
	506	1.12226	1.19066	1.53289	1.49145
	505	1.14631	1.21677	1.55914	1.52164
	504	1.1715	1.24371	1.58544	1.5524
	503	1.19645	1.27068	1.61191	1.58219
	502	1.22099	1.29681	1.63825	1.61185
	501	1.24667	1.32374	1.66422	1.64185
	500	1.27183	1.35005	1.69067	1.67231
	499	1.29804	1.37702	1.71681	1.70287
	498	1.3236	1.40439	1.74327	1.7331
	497	1.34978	1.43135	1.76948	1.76328
	496	1.37572	1.45899	1.79544	1.79351
	495	1.4015	1.48591	1.82085	1.8241
	494	1.42892	1.5141	1.84603	1.8541
	493	1.4558	1.5419	1.87171	1.88445
	492	1.48295	1.56941	1.89697	1.91379
	491	1.50982	1.59764	1.92193	1.94339
	490	1.53684	1.62472	1.94681	1.97214
	489	1.56445	1.65274	1.97145	2.0011
	488	1.5912	1.67968	1.99635	2.0299
	487	1.61877	1.70719	2.02023	2.05887
	486	1.64576	1.73465	2.04357	2.08728
	485	1.67203	1.76137	2.06656	2.1146
	484	1.69902	1.78821	2.08977	2.14195
	483	1.72543	1.81401	2.11254	2.16916
	482	1.75265	1.84065	2.13507	2.19595
	481	1.77996	1.86646	2.15742	2.22271
	480	1.80721	1.89275	2.17923	2.24883
	479	1.83377	1.91895	2.20062	2.2745
	478	1.8602	1.94362	2.22132	2.30036
	477	1.88636	1.9686	2.24123	2.32518
	476	1.91172	1.99348	2.261	2.35017
	475	1.93702	2.01825	2.2809	2.3742
	474	1.96126	2.0423	2.30045	2.39764
	473	1.98533	2.06566	2.31983	2.42036
	472	2.00999	2.08842	2.33829	2.44299
	471	2.03387	2.10964	2.35691	2.46499
	470	2.05783	2.13112	2.37445	2.48604
	469	2.08197	2.15334	2.39124	2.50729
	468	2.10569	2.17482	2.4078	2.52778
	467	2.12879	2.19558	2.42503	2.54848
	466	2.15112	2.21739	2.44039	2.56768
	465	2.1731	2.23761	2.45567	2.58631
	464	2.19351	2.25667	2.47038	2.6038
	463	2.2149	2.27464	2.48524	2.62146
	462	2.23552	2.29267	2.50007	2.63882
	461	2.25528	2.30931	2.51319	2.65591
	460	2.27533	2.32726	2.52582	2.67152
	459	2.29324	2.34402	2.53821	2.68631
	458	2.31072	2.35813	2.55038	2.70052
	457	2.32828	2.37415	2.56207	2.71525
	456	2.34541	2.38805	2.57303	2.72867
	455	2.36278	2.4034	2.58309	2.74068
	454	2.37964	2.41762	2.59389	2.7521
	453	2.39325	2.42917	2.60469	2.76368
	452	2.40892	2.44087	2.61368	2.77464
	451	2.42293	2.45315	2.62218	2.78455
	450	2.43648	2.4643	2.62991	2.79485
	449	2.45179	2.47626	2.63755	2.80372
	448	2.46245	2.48617	2.64624	2.81207
	447	2.47528	2.49456	2.65367	2.82001
	446	2.48635	2.50351	2.66111	2.82755
	445	2.49603	2.51151	2.66767	2.83496
	444	2.50741	2.52044	2.67352	2.84237
	443	2.51692	2.52754	2.67868	2.84914
	442	2.5268	2.53535	2.68332	2.85564
	441	2.53686	2.5423	2.68827	2.85998
	440	2.54408	2.54708	2.6932	2.86433
	439	2.55239	2.55476	2.69731	2.86958
	438	2.56062	2.55898	2.70249	2.87479
	437	2.56869	2.56401	2.70687	2.87797
	436	2.57602	2.56926	2.71065	2.88129
	435	2.58057	2.57096	2.71443	2.88539
	434	2.58735	2.57521	2.71643	2.88938
	433	2.59238	2.57765	2.71868	2.89288
	432	2.59822	2.58139	2.71999	2.89592
	431	2.60393	2.58645	2.72257	2.89783
	430	2.60637	2.58918	2.72584	2.89926
	429	2.60985	2.59144	2.72802	2.90092
	428	2.6144	2.59313	2.72967	2.9018
	427	2.61887	2.59302	2.73053	2.90266
	426	2.62379	2.59271	2.73084	2.90356
	425	2.62756	2.59512	2.73109	2.90271
	424	2.62582	2.59555	2.73095	2.90187
	423	2.6275	2.59673	2.7304	2.90081
	422	2.62747	2.59584	2.73026	2.90082
	421	2.6261	2.59426	2.72979	2.89868
	420	2.62491	2.59582	2.73133	2.90223
	419	2.62484	2.59417	2.73087	2.9015
	418	2.62433	2.59285	2.73097	2.89943
	417	2.62298	2.58992	2.73237	2.8966
	416	2.62297	2.59095	2.73141	2.89578
	415	2.62405	2.59062	2.73081	2.89355
	414	2.62453	2.58897	2.72916	2.89291
	413	2.62434	2.58913	2.72816	2.89361
	412	2.62393	2.58908	2.7268	2.89349
	411	2.62223	2.58684	2.72531	2.89234
	410	2.62354	2.58558	2.72367	2.88816
	409	2.61981	2.58341	2.72172	2.88565
	408	2.61934	2.57612	2.72155	2.88309
	407	2.61939	2.57515	2.7197	2.88033
	406	2.615	2.57345	2.71825	2.87844
	405	2.61684	2.57045	2.71572	2.87647
	404	2.61403	2.56984	2.71455	2.87476
	403	2.61271	2.56662	2.71291	2.87092
	402	2.61373	2.56412	2.71162	2.86919
	401	2.61203	2.56137	2.70778	2.86566
	400	2.61192	2.55988	2.70454	2.86354
	399	2.60793	2.55719	2.70177	2.85927
	398	2.60387	2.5545	2.69817	2.85621
	397	2.59935	2.55191	2.69596	2.85286
	396	2.59534	2.54791	2.69331	2.84931
	395	2.59253	2.54225	2.69106	2.84589
	394	2.59066	2.53696	2.68838	2.84219
	393	2.59074	2.53098	2.68341	2.83824
	392	2.58849	2.52928	2.67942	2.83412
	391	2.5837	2.5275	2.67716	2.83017
	390	2.57915	2.52376	2.67399	2.82869
	389	2.57283	2.52252	2.66992	2.82574
	388	2.57028	2.51835	2.66521	2.82049
	387	2.56709	2.51694	2.66038	2.81507
	386	2.56193	2.51202	2.65688	2.81146
	385	2.56327	2.5094	2.65294	2.80657
	384	2.55523	2.50608	2.64818	2.80288
	383	2.5522	2.50353	2.64585	2.79838
	382	2.55181	2.49994	2.64201	2.7947
	381	2.54214	2.49399	2.63875	2.78881
	380	2.54083	2.4875	2.63393	2.78371
	379	2.53791	2.47936	2.63016	2.77731
	378	2.53305	2.47713	2.62663	2.77367
	377	2.53077	2.47128	2.62129	2.76921
	376	2.5279	2.4669	2.6169	2.76694
	375	2.52282	2.46114	2.61129	2.76191
	374	2.51612	2.45318	2.6074	2.75537
	373	2.5118	2.44847	2.60319	2.74983
	372	2.50587	2.44397	2.59939	2.74443
	371	2.50151	2.43892	2.59583	2.73958
	370	2.48507	2.43197	2.58002	2.73133
	369	2.47764	2.42239	2.57577	2.72477
	368	2.4704	2.41303	2.56961	2.72065
	367	2.46291	2.40831	2.56669	2.71495
	366	2.46202	2.40816	2.56076	2.71195
	365	2.46182	2.40641	2.556	2.70541
	364	2.46154	2.40243	2.55139	2.70072
	363	2.46091	2.39986	2.54837	2.69166
	362	2.45443	2.39329	2.54463	2.68774
	361	2.44907	2.3843	2.54034	2.68277
	360	2.44307	2.38298	2.53623	2.67847
	359	2.44234	2.3752	2.5273	2.67223
	358	2.44151	2.37015	2.52482	2.66522
	357	2.43123	2.36513	2.52065	2.65806
	356	2.42736	2.35831	2.51728	2.65279
	355	2.41882	2.35606	2.51074	2.64598
	354	2.40813	2.34833	2.50191	2.63992
	353	2.40412	2.34268	2.49671	2.6309
	352	2.39978	2.33827	2.49018	2.62569
	351	2.39682	2.33132	2.48415	2.62235
	350	2.39253	2.32578	2.47786	2.61677
	349	2.38834	2.32151	2.47336	2.61216
	348	2.38508	2.3163	2.46574	2.60625
	347	2.37843	2.30794	2.46299	2.60252
	346	2.37304	2.3036	2.46059	2.59602
	345	2.37051	2.29736	2.45305	2.59071
	344	2.35742	2.28881	2.44506	2.5828
	343	2.34673	2.28728	2.43765	2.57755
	342	2.34022	2.28305	2.42933	2.56999
	341	2.33284	2.27494	2.42457	2.56529
	340	2.33802	2.26795	2.4155	2.55167
	339	2.32789	2.26391	2.41103	2.54295
	338	2.32594	2.26029	2.40192	2.53892
	337	2.31674	2.2542	2.39273	2.53364
	336	2.31274	2.25496	2.38886	2.52922
	335	2.30965	2.24864	2.38472	2.5252
	334	2.30421	2.24299	2.37983	2.51892
	333	2.30171	2.23909	2.37282	2.50579
	332	2.29536	2.22661	2.36189	2.49837
	331	2.28639	2.21993	2.35278	2.49086
	330	2.27486	2.21158	2.34461	2.48455
	329	2.26365	2.20371	2.3375	2.4745
	328	2.25451	2.19887	2.33152	2.46335
	327	2.246	2.19245	2.32114	2.45607
	326	2.24167	2.18597	2.31127	2.45021
	325	2.2333	2.17464	2.30213	2.44462
	324	2.23052	2.16854	2.29462	2.43472
	323	2.22261	2.15862	2.28674	2.4272
	322	2.21315	2.15331	2.27965	2.42021
	321	2.20843	2.15169	2.27459	2.41446
	320	2.19909	2.14295	2.26795	2.40531
	319	2.19554	2.13641	2.25975	2.39738
	318	2.19153	2.12806	2.25046	2.3893
	317	2.18616	2.11942	2.2405	2.38319
	316	2.17681	2.1152	2.2326	2.37338
	315	2.16761	2.11144	2.2248	2.36607
	314	2.15874	2.10088	2.21595	2.35947
	313	2.15005	2.09501	2.20611	2.35268
	312	2.14101	2.08763	2.19855	2.34277
	311	2.13483	2.07882	2.19028	2.33597
	310	2.12921	2.07513	2.18375	2.3272
	309	2.12222	2.06446	2.17432	2.32193
	308	2.11899	2.05514	2.16565	2.31571
	307	2.11508	2.04953	2.15828	2.31063
	306	2.10623	2.04413	2.1502	2.30248
	305	2.09957	2.04215	2.14318	2.29513
	304	2.09126	2.03821	2.13499	2.28586
	303	2.08229	2.0336	2.12495	2.2796
	302	2.07644	2.02667	2.11541	2.27383
	301	2.06862	2.01741	2.10815	2.26809
	300	2.06204	2.0108	2.1021	2.25993
	299	2.0541	2.00198	2.09364	2.24778
	298	2.04762	1.99686	2.08202	2.23878
	297	2.04001	1.99053	2.0742	2.22961
	296	2.03267	1.9809	2.06328	2.21919
	295	2.02375	1.96923	2.05706	2.2095
	294	2.01659	1.9569	2.04925	2.19825
	293	2.00998	1.94774	2.04228	2.19211
	292	2.00164	1.94093	2.03467	2.18437
	291	1.99407	1.93411	2.02233	2.17641
	290	1.98271	1.92352	2.01156	2.16428
	289	1.97482	1.91474	2.00319	2.15523
	288	1.96567	1.90622	1.99512	2.14527
	287	1.95551	1.89725	1.98771	2.13632
	286	1.9475	1.89162	1.97946	2.12843
	285	1.93747	1.88249	1.97371	2.11977
	284	1.92801	1.8745	1.96775	2.11421
	283	1.92096	1.869	1.96225	2.10675
	282	1.91505	1.86131	1.95619	2.09875
	281	1.90779	1.8526	1.94908	2.08866
	280	1.90102	1.84457	1.94122	2.07886
	279	1.8919	1.83371	1.93449	2.07174
	278	1.88095	1.82892	1.92663	2.06423
	277	1.87146	1.8235	1.91939	2.05784
	276	1.86307	1.81652	1.91011	2.04914
	275	1.85675	1.80735	1.90358	2.04122
	274	1.85031	1.79759	1.89389	2.03213
	273	1.84312	1.78762	1.88655	2.0223
	272	1.83403	1.77974	1.878	2.01309
	271	1.82664	1.775	1.86774	2.0032
	270	1.81599	1.76285	1.85923	1.99207
	269	1.80688	1.75676	1.85129	1.98423
	268	1.80104	1.74691	1.84357	1.97562
	267	1.79231	1.73578	1.83537	1.96751
	266	1.78557	1.73113	1.82591	1.95775
	265	1.77384	1.72109	1.81539	1.94542
	264	1.76135	1.71186	1.80676	1.93635
	263	1.74969	1.70523	1.79827	1.92608
	262	1.73879	1.69611	1.79096	1.92014
	261	1.73436	1.68787	1.78163	1.9084
	260	1.72647	1.6818	1.77281	1.89817
	259	1.71846	1.67042	1.76335	1.88487
	258	1.7082	1.66007	1.75305	1.87551
	257	1.69692	1.65166	1.74351	1.86522
	256	1.68456	1.63845	1.73079	1.85291
	255	1.67091	1.62991	1.72022	1.84064
	254	1.65919	1.61927	1.70852	1.82588
	253	1.64733	1.60471	1.69669	1.81317
	252	1.63517	1.59184	1.68517	1.8006
	251	1.62325	1.5771	1.67204	1.78798
	250	1.61092	1.56262	1.65661	1.77295
	249	1.59673	1.54876	1.64085	1.75881
	248	1.58642	1.53537	1.62614	1.74503
	247	1.57681	1.52345	1.61067	1.73117
	246	1.56544	1.51055	1.59081	1.71306
	245	1.5527	1.49931	1.57238	1.69829
	244	1.53696	1.48684	1.55581	1.68217
	243	1.52029	1.47011	1.53907	1.66898
	242	1.50278	1.45561	1.52237	1.65272
	241	1.49008	1.4407	1.50354	1.63539
	240	1.47749	1.42548	1.48734	1.61688
	239	1.46033	1.41309	1.47031	1.59813
	238	1.44603	1.39643	1.45173	1.57868
	237	1.4298	1.37793	1.42651	1.55726
	236	1.4087	1.35898	1.40168	1.53375
	235	1.39321	1.34024	1.37512	1.50793
	234	1.37268	1.31938	1.34827	1.4816
	233	1.34546	1.29613	1.32004	1.45547
	232	1.3271	1.2784	1.29467	1.43156
	231	1.30616	1.25209	1.27217	1.40658
	230	1.2878	1.23315	1.25164	1.38571
	229	1.27602	1.22212	1.23448	1.36768
	228	1.26297	1.20204	1.21839	1.35652
	227	1.24823	1.1925	1.20489	1.34728
	226	1.23516	1.17826	1.19493	1.33764
	225	1.22916	1.16767	1.18687	1.33178
	224	1.21912	1.16242	1.18226	1.32628
	223	1.21619	1.15934	1.18281	1.32883
	222	1.22498	1.16021	1.18606	1.33461
	221	1.22185	1.15879	1.19377	1.34477
	220	1.22995	1.16074	1.20195	1.3486
	219	1.22817	1.16158	1.20523	1.35218
	218	1.22903	1.16328	1.21207	1.36074
	217	1.23102	1.16892	1.21552	1.36513
	216	1.23337	1.17177	1.22446	1.3722
	215	1.24154	1.17108	1.22674	1.37033
	214	1.24495	1.17479	1.22875	1.37203
	213	1.24563	1.17621	1.23106	1.3688
	212	1.2422	1.17211	1.23234	1.36616
	211	1.23503	1.16754	1.2276	1.36147
	210	1.22148	1.1616	1.21942	1.35653
	209	1.22138	1.14594	1.20889	1.34679
	208	1.20859	1.14439	1.20161	1.33301
	207	1.20586	1.1391	1.18854	1.31717
	206	1.18779	1.12081	1.17142	1.29519
	205	1.16326	1.10472	1.14142	1.27195
	204	1.13382	1.07109	1.11002	1.24214
	203	1.09199	1.03698	1.06584	1.21311
	202	1.07157	1.00888	1.02925	1.17107
	201	1.03121	0.95931	0.989554	1.13385
	200	1.01111	0.928641	0.956143	1.09671

## Sheet: Figure 3_A
		Intensity / a.u.
	2θ / deg	a	b	c	d	e	f	g	h	i
	10	616.667	1000	816.667	966.667	900	816.667	900	750	0
	10.01	583.333	816.667	716.667	1000	716.667	833.333	900	833.333	0
	10.02	966.667	816.667	900	816.667	683.333	833.333	866.667	616.667	0
	10.03	750	1016.67	783.333	933.333	650	650	900	716.667	0
	10.04	900	833.333	966.667	866.667	716.667	500	1016.67	716.667	0
	10.05	716.667	833.333	800	966.667	750	766.667	1150	683.333	0
	10.06	750	833.333	983.333	1183.33	900	766.667	1200	833.333	0
	10.07	533.333	1050	900	1116.67	750	716.667	1083.33	750	0
	10.08	683.333	1016.67	1083.33	933.333	683.333	833.333	933.333	650	0
	10.09	833.333	866.667	866.667	900	733.333	933.333	950	833.333	0
	10.1	866.667	833.333	766.667	1016.67	766.667	733.333	833.333	900	0
	10.11	683.333	983.333	983.333	983.333	716.667	616.667	916.667	983.333	0
	10.12	866.667	1166.67	950	866.667	833.333	800	916.667	833.333	0
	10.13	1016.67	1083.33	1050	900	950	766.667	1016.67	516.667	0
	10.14	833.333	1050	983.333	766.667	866.667	616.667	1166.67	583.333	0
	10.15	700	683.333	1016.67	866.667	800	700	983.333	650	0
	10.16	666.667	733.333	883.333	916.667	866.667	800	866.667	483.333	0
	10.17	766.667	1016.67	850	850	883.333	850	916.667	616.667	0
	10.18	666.667	1066.67	916.667	950	983.333	800	983.333	650	0
	10.19	550	1133.33	916.667	1100	833.333	666.667	916.667	700	0
	10.2	583.333	1033.33	1066.67	950	700	616.667	800	766.667	0
	10.21	700	850	1033.33	550	733.333	633.333	883.333	616.667	0
	10.22	550	850	1133.33	766.667	766.667	616.667	800	816.667	0
	10.23	733.333	733.333	1316.67	966.667	850	616.667	950	766.667	0
	10.24	816.667	883.333	1183.33	1216.67	1000	700	1000	666.667	0
	10.25	733.333	1033.33	1116.67	1100	816.667	816.667	916.667	883.333	0
	10.26	883.333	916.667	783.333	1300	916.667	516.667	1066.67	916.667	0
	10.27	666.667	1100	783.333	933.333	916.667	600	883.333	766.667	0
	10.28	583.333	1066.67	883.333	883.333	850	666.667	850	783.333	0
	10.29	750	1033.33	966.667	783.333	783.333	666.667	783.333	883.333	0
	10.3	600	966.667	816.667	666.667	700	633.333	1000	700	0
	10.31	733.333	900	733.333	1033.33	933.333	700	966.667	783.333	0
	10.32	816.667	933.333	850	1033.33	1083.33	633.333	1050	850	0
	10.33	633.333	866.667	966.667	1000	1050	550	866.667	816.667	0
	10.34	633.333	1050	1150	1000	850	566.667	866.667	850	0
	10.35	666.667	1016.67	1150	850	716.667	633.333	866.667	750	0
	10.36	633.333	866.667	1116.67	1000	716.667	783.333	866.667	683.333	0
	10.37	716.667	983.333	866.667	983.333	683.333	783.333	866.667	683.333	0
	10.38	816.667	966.667	966.667	833.333	716.667	633.333	750	783.333	0
	10.39	750	816.667	1116.67	683.333	866.667	833.333	833.333	716.667	0
	10.4	750	816.667	1083.33	783.333	900	900	966.667	783.333	0
	10.41	716.667	950	950	1083.33	1050	716.667	983.333	666.667	0
	10.42	783.333	1083.33	983.333	1050	900	716.667	1016.67	683.333	0
	10.43	800	1050	983.333	1166.67	900	650	933.333	783.333	0
	10.44	833.333	866.667	800	1050	800	783.333	950	533.333	0
	10.45	566.667	750	750	900	800	716.667	1100	650	0
	10.46	483.333	866.667	950	750	800	600	866.667	633.333	0
	10.47	616.667	833.333	833.333	900	1066.67	650	916.667	866.667	0
	10.48	866.667	800	950	866.667	800	766.667	800	833.333	0
	10.49	616.667	983.333	1100	1016.67	950	616.667	800	1016.67	0
	10.5	683.333	950	950	983.333	883.333	766.667	950	833.333	0
	10.51	733.333	916.667	1000	916.667	766.667	800	1133.33	650	0
	10.52	600	1100	800	1000	800	866.667	866.667	800	0
	10.53	716.667	1100	733.333	883.333	850	733.333	766.667	766.667	0
	10.54	833.333	1000	950	883.333	716.667	616.667	766.667	800	0
	10.55	800	850	1100	916.667	566.667	800	650	766.667	0
	10.56	700	733.333	1183.33	916.667	700	800	833.333	700	0
	10.57	566.667	966.667	1150	1066.67	766.667	916.667	966.667	583.333	0
	10.58	700	1033.33	1000	1200	700	683.333	950	800	0
	10.59	800	850	1033.33	1066.67	683.333	583.333	1000	883.333	0
	10.6	816.667	916.667	1033.33	916.667	766.667	733.333	816.667	816.667	0
	10.61	966.667	1050	1083.33	966.667	850	733.333	916.667	800	0
	10.62	850	916.667	1116.67	1033.33	816.667	550	916.667	883.333	0
	10.63	766.667	733.333	933.333	883.333	933.333	850	916.667	733.333	0
	10.64	783.333	966.667	783.333	850	733.333	966.667	816.667	616.667	0
	10.65	666.667	816.667	933.333	966.667	733.333	666.667	1083.33	850	0
	10.66	650	766.667	850	966.667	666.667	533.333	1166.67	933.333	0
	10.67	733.333	900	783.333	1116.67	816.667	666.667	933.333	966.667	0
	10.68	783.333	816.667	1050	966.667	816.667	666.667	1000	1050	0
	10.69	933.333	816.667	900	933.333	1083.33	666.667	900	750	0
	10.7	816.667	783.333	1016.67	1083.33	966.667	750	1050	666.667	0
	10.71	783.333	850	1100	1200	1050	700	1200	750	0
	10.72	700	816.667	816.667	900	816.667	783.333	983.333	700	0
	10.73	700	733.333	750	1166.67	866.667	816.667	900	783.333	0
	10.74	833.333	866.667	983.333	983.333	783.333	783.333	933.333	816.667	0
	10.75	816.667	866.667	1050	866.667	833.333	666.667	1016.67	933.333	0
	10.76	750	1016.67	1133.33	900	666.667	716.667	1016.67	833.333	0
	10.77	716.667	1016.67	1016.67	833.333	783.333	666.667	866.667	816.667	0
	10.78	866.667	783.333	916.667	833.333	950	783.333	783.333	816.667	0
	10.79	916.667	983.333	816.667	916.667	866.667	916.667	816.667	833.333	0
	10.8	900	866.667	866.667	1100	833.333	800	833.333	1133.33	0
	10.81	866.667	600	1016.67	1016.67	983.333	666.667	983.333	950	0
	10.82	633.333	833.333	950	900	1000	983.333	983.333	833.333	0
	10.83	633.333	983.333	1000	1150	950	983.333	900	916.667	0
	10.84	683.333	983.333	1000	1066.67	1100	750	866.667	783.333	0
	10.85	683.333	1033.33	916.667	916.667	983.333	683.333	783.333	833.333	0
	10.86	766.667	800	983.333	950	800	800	916.667	833.333	0
	10.87	516.667	766.667	883.333	883.333	716.667	883.333	950	683.333	0
	10.88	450	600	1000	950	800	716.667	866.667	600	0
	10.89	716.667	833.333	966.667	916.667	800	800	883.333	866.667	0
	10.9	750	950	916.667	1050	766.667	600	966.667	716.667	0
	10.91	950	966.667	800	916.667	850	716.667	966.667	716.667	0
	10.92	750	966.667	833.333	850	1000	750	833.333	566.667	0
	10.93	733.333	1050	966.667	966.667	850	633.333	716.667	600	0
	10.94	683.333	966.667	1050	933.333	966.667	516.667	850	683.333	0
	10.95	716.667	1000	1166.67	1000	966.667	683.333	933.333	716.667	0
	10.96	683.333	1016.67	1016.67	1116.67	933.333	850	1000	733.333	0
	10.97	800	883.333	1133.33	966.667	800	800	766.667	800	0
	10.98	766.667	900	1050	800	933.333	800	883.333	650	0
	10.99	616.667	933.333	816.667	766.667	1250	566.667	933.333	650	0
	11	566.667	883.333	900	1016.67	933.333	600	883.333	800	0
	11.01	733.333	933.333	966.667	900	700	650	1016.67	733.333	0
	11.02	700	933.333	883.333	816.667	850	616.667	1100	850	0
	11.03	566.667	966.667	966.667	966.667	983.333	766.667	1016.67	700	0
	11.04	500	816.667	1050	866.667	966.667	733.333	966.667	783.333	0
	11.05	500	866.667	1066.67	966.667	766.667	783.333	1016.67	733.333	0
	11.06	850	1133.33	1266.67	1050	983.333	733.333	1016.67	816.667	0
	11.07	900	1150	1150	933.333	866.667	850	1016.67	683.333	0
	11.08	783.333	950	950	850	850	766.667	866.667	583.333	0
	11.09	666.667	900	1066.67	900	850	733.333	850	733.333	0
	11.1	650	1016.67	950	783.333	900	733.333	933.333	866.667	0
	11.11	650	933.333	933.333	950	950	733.333	833.333	833.333	0
	11.12	583.333	916.667	833.333	1066.67	1066.67	866.667	1033.33	700	0
	11.13	616.667	916.667	866.667	983.333	1066.67	750	900	616.667	0
	11.14	566.667	1066.67	700	916.667	916.667	666.667	833.333	583.333	0
	11.15	616.667	1000	900	1150	833.333	783.333	1033.33	700	0
	11.16	650	900	1083.33	1066.67	816.667	833.333	1066.67	700	0
	11.17	900	833.333	983.333	866.667	783.333	750	950	700	0
	11.18	833.333	800	1066.67	800	666.667	750	783.333	800	0
	11.19	800	916.667	966.667	916.667	783.333	550	883.333	783.333	0
	11.2	833.333	950	866.667	800	833.333	633.333	950	783.333	0
	11.21	716.667	866.667	633.333	800	833.333	750	666.667	883.333	0
	11.22	750	800	666.667	833.333	833.333	700	750	800	0
	11.23	716.667	783.333	750	1033.33	866.667	666.667	1000	750	0
	11.24	633.333	883.333	750	1050	750	716.667	1133.33	633.333	0
	11.25	633.333	833.333	833.333	966.667	783.333	700	1100	633.333	0
	11.26	700	916.667	1000	850	933.333	616.667	1216.67	766.667	0
	11.27	800	933.333	966.667	883.333	1000	500	1100	850	0
	11.28	633.333	1000	933.333	1016.67	800	666.667	1016.67	800	0
	11.29	583.333	883.333	1050	883.333	683.333	833.333	1133.33	766.667	0
	11.3	666.667	1000	1050	1050	800	850	1150	666.667	0
	11.31	766.667	916.667	1100	1183.33	883.333	916.667	1150	766.667	0
	11.32	633.333	800	1133.33	916.667	833.333	766.667	966.667	683.333	0
	11.33	850	900	1016.67	800	933.333	683.333	833.333	766.667	0
	11.34	850	850	933.333	1066.67	1016.67	666.667	883.333	883.333	0
	11.35	850	883.333	850	1016.67	766.667	666.667	983.333	766.667	0
	11.36	716.667	883.333	766.667	1116.67	766.667	683.333	1066.67	733.333	0
	11.37	800	983.333	733.333	1116.67	850	583.333	933.333	650	0
	11.38	650	900	850	966.667	800	683.333	816.667	733.333	0
	11.39	600	950	1116.67	850	733.333	733.333	850	883.333	0
	11.4	683.333	983.333	1150	850	850	866.667	816.667	800	0
	11.41	650	866.667	983.333	900	933.333	850	1100	716.667	0
	11.42	600	950	900	850	950	850	1150	766.667	0
	11.43	600	1033.33	866.667	933.333	716.667	866.667	1016.67	633.333	0
	11.44	600	933.333	950	1066.67	633.333	950	866.667	700	0
	11.45	783.333	900	866.667	1000	933.333	1033.33	933.333	683.333	0
	11.46	866.667	1000	983.333	1000	866.667	916.667	1066.67	783.333	0
	11.47	850	950	1083.33	1066.67	733.333	733.333	1116.67	866.667	0
	11.48	866.667	1066.67	983.333	983.333	900	833.333	1083.33	783.333	0
	11.49	766.667	1083.33	1033.33	1050	816.667	766.667	900	816.667	0
	11.5	683.333	1116.67	866.667	1133.33	783.333	466.667	916.667	816.667	0
	11.51	700	866.667	950	1166.67	750	733.333	1050	833.333	0
	11.52	816.667	916.667	1000	1050	733.333	733.333	1050	783.333	0
	11.53	833.333	950	966.667	1050	866.667	1050	916.667	700	0
	11.54	733.333	883.333	950	1050	950	1033.33	950	816.667	0
	11.55	616.667	883.333	833.333	1100	783.333	866.667	966.667	733.333	0
	11.56	666.667	950	816.667	883.333	700	816.667	950	616.667	0
	11.57	566.667	1000	883.333	666.667	600	916.667	1100	800	0
	11.58	533.333	833.333	950	750	700	800	1083.33	866.667	0
	11.59	616.667	866.667	1000	783.333	616.667	650	916.667	750	0
	11.6	700	750	1000	1016.67	833.333	733.333	866.667	800	0
	11.61	616.667	650	1000	1016.67	966.667	866.667	800	800	0
	11.62	700	916.667	916.667	850	716.667	800	1000	833.333	0
	11.63	750	1016.67	983.333	1066.67	800	700	1133.33	1016.67	0
	11.64	783.333	933.333	1050	1150	883.333	616.667	1100	933.333	0
	11.65	700	833.333	1016.67	833.333	850	666.667	983.333	833.333	0
	11.66	716.667	633.333	883.333	700	850	850	983.333	800	0
	11.67	583.333	750	766.667	883.333	883.333	766.667	850	716.667	0
	11.68	500	1066.67	933.333	900	1016.67	716.667	900	966.667	0
	11.69	666.667	900	1066.67	966.667	1116.67	883.333	883.333	933.333	0
	11.7	766.667	850	1066.67	850	966.667	933.333	766.667	850	0
	11.71	666.667	800	983.333	850	1033.33	833.333	883.333	750	0
	11.72	900	883.333	950	1216.67	1216.67	683.333	1066.67	883.333	0
	11.73	816.667	816.667	1016.67	1066.67	1016.67	766.667	900	800	0
	11.74	933.333	750	950	816.667	883.333	933.333	850	883.333	0
	11.75	933.333	800	950	1083.33	933.333	850	983.333	933.333	0
	11.76	1000	816.667	1066.67	1066.67	900	750	933.333	983.333	0
	11.77	733.333	866.667	850	800	766.667	550	983.333	866.667	0
	11.78	616.667	866.667	1000	716.667	800	583.333	900	800	0
	11.79	800	1000	816.667	766.667	800	633.333	1033.33	800	0
	11.8	800	1000	983.333	816.667	816.667	733.333	1166.67	716.667	0
	11.81	800	916.667	1000	916.667	850	866.667	1083.33	733.333	0
	11.82	816.667	950	916.667	1050	866.667	766.667	866.667	733.333	0
	11.83	716.667	1000	916.667	1033.33	850	666.667	900	850	0
	11.84	633.333	900	916.667	1050	850	683.333	966.667	850	0
	11.85	583.333	966.667	766.667	950	850	850	900	733.333	0
	11.86	583.333	966.667	716.667	916.667	916.667	866.667	950	733.333	0
	11.87	716.667	733.333	833.333	1000	900	733.333	950	783.333	0
	11.88	733.333	766.667	766.667	866.667	833.333	766.667	1050	1016.67	0
	11.89	683.333	1050	683.333	733.333	700	766.667	966.667	916.667	0
	11.9	700	950	866.667	816.667	916.667	733.333	883.333	816.667	0
	11.91	683.333	1016.67	766.667	1000	1050	700	1016.67	950	0
	11.92	750	1000	750	783.333	1000	733.333	1100	733.333	0
	11.93	833.333	916.667	700	783.333	833.333	650	966.667	866.667	0
	11.94	750	916.667	1000	916.667	816.667	750	816.667	833.333	0
	11.95	783.333	883.333	966.667	1050	966.667	783.333	733.333	883.333	0
	11.96	966.667	1016.67	1016.67	1016.67	733.333	750	833.333	966.667	0
	11.97	883.333	933.333	1016.67	916.667	866.667	783.333	1066.67	966.667	0
	11.98	833.333	800	1016.67	916.667	983.333	800	1150	833.333	0
	11.99	650	800	783.333	933.333	883.333	700	1033.33	833.333	0
	12	616.667	883.333	783.333	1166.67	883.333	783.333	916.667	733.333	0
	12.01	733.333	1016.67	800	1166.67	883.333	733.333	1016.67	783.333	0
	12.02	833.333	966.667	850	1016.67	833.333	783.333	933.333	883.333	0
	12.03	750	850	833.333	1066.67	833.333	733.333	833.333	883.333	0
	12.04	566.667	666.667	933.333	933.333	833.333	700	750	850	0
	12.05	616.667	833.333	833.333	983.333	883.333	850	800	933.333	0
	12.06	833.333	933.333	800	1083.33	950	783.333	983.333	833.333	0
	12.07	850	883.333	900	983.333	950	616.667	1083.33	716.667	0
	12.08	650	900	883.333	983.333	883.333	666.667	950	766.667	0
	12.09	650	850	800	1216.67	716.667	750	950	883.333	0
	12.1	750	1050	1050	1000	900	766.667	883.333	900	0
	12.11	800	800	1033.33	900	950	750	950	883.333	0
	12.12	900	666.667	933.333	666.667	816.667	666.667	1050	933.333	0
	12.13	983.333	900	933.333	800	800	666.667	983.333	866.667	0
	12.14	716.667	916.667	1083.33	1083.33	900	583.333	1033.33	850	0
	12.15	750	950	1083.33	1050	866.667	816.667	966.667	766.667	0
	12.16	666.667	850	850	1100	800	816.667	866.667	866.667	0
	12.17	716.667	850	916.667	1083.33	800	750	950	766.667	0
	12.18	850	800	950	1183.33	966.667	766.667	1050	666.667	0
	12.19	800	716.667	1133.33	950	1050	816.667	966.667	966.667	0
	12.2	666.667	766.667	850	766.667	916.667	966.667	900	816.667	0
	12.21	666.667	816.667	866.667	966.667	966.667	733.333	1000	866.667	0
	12.22	533.333	783.333	1050	1066.67	1100	716.667	1166.67	900	0
	12.23	666.667	716.667	950	1000	816.667	900	1116.67	783.333	0
	12.24	716.667	766.667	916.667	966.667	733.333	1016.67	1000	883.333	0
	12.25	716.667	833.333	1000	883.333	666.667	866.667	1050	866.667	0
	12.26	783.333	866.667	966.667	933.333	633.333	683.333	1100	883.333	0
	12.27	733.333	933.333	866.667	883.333	783.333	733.333	1150	733.333	0
	12.28	666.667	883.333	916.667	1033.33	816.667	783.333	1066.67	683.333	0
	12.29	733.333	766.667	933.333	933.333	733.333	866.667	1016.67	716.667	0
	12.3	716.667	866.667	1016.67	916.667	833.333	783.333	1083.33	600	0
	12.31	683.333	1033.33	933.333	983.333	766.667	683.333	983.333	666.667	0
	12.32	600	966.667	816.667	933.333	983.333	650	766.667	833.333	0
	12.33	866.667	783.333	700	1066.67	816.667	766.667	916.667	783.333	0
	12.34	816.667	933.333	816.667	1066.67	750	683.333	933.333	683.333	0
	12.35	850	1033.33	933.333	916.667	983.333	733.333	1016.67	683.333	0
	12.36	783.333	933.333	833.333	966.667	966.667	700	850	933.333	0
	12.37	833.333	883.333	1066.67	900	850	750	1083.33	800	0
	12.38	850	833.333	883.333	1000	850	800	1050	1000	0
	12.39	733.333	883.333	750	933.333	833.333	750	983.333	733.333	0
	12.4	800	800	1000	1050	750	683.333	983.333	850	0
	12.41	750	800	1050	1050	683.333	800	900	933.333	0
	12.42	650	933.333	1000	883.333	633.333	850	783.333	833.333	0
	12.43	650	1033.33	1000	933.333	700	683.333	883.333	833.333	0
	12.44	983.333	850	883.333	1033.33	783.333	583.333	983.333	933.333	0
	12.45	833.333	833.333	783.333	1233.33	1033.33	783.333	883.333	883.333	0
	12.46	750	883.333	800	1233.33	883.333	783.333	900	783.333	0
	12.47	666.667	816.667	950	1116.67	866.667	750	1066.67	816.667	0
	12.48	750	866.667	916.667	1000	800	800	1100	900	0
	12.49	816.667	850	916.667	950	716.667	750	1066.67	800	0
	12.5	700	1016.67	950	1066.67	916.667	900	850	750	0
	12.51	566.667	916.667	1016.67	1000	1050	866.667	900	800	0
	12.52	616.667	800	1000	866.667	1000	766.667	916.667	716.667	0
	12.53	766.667	1000	1000	966.667	900	716.667	850	666.667	0
	12.54	916.667	966.667	966.667	866.667	850	700	800	716.667	0
	12.55	750	966.667	916.667	816.667	916.667	700	850	650	0
	12.56	750	1000	850	950	900	666.667	850	766.667	0
	12.57	750	1116.67	816.667	950	850	600	1000	700	0
	12.58	816.667	1066.67	900	900	950	666.667	950	750	0
	12.59	866.667	966.667	850	966.667	916.667	616.667	816.667	750	0
	12.6	650	966.667	933.333	816.667	833.333	866.667	1066.67	916.667	0
	12.61	566.667	983.333	1066.67	750	833.333	966.667	1083.33	866.667	0
	12.62	650	916.667	933.333	716.667	766.667	766.667	1033.33	933.333	0
	12.63	600	1083.33	833.333	983.333	616.667	716.667	983.333	883.333	0
	12.64	566.667	1033.33	866.667	916.667	716.667	816.667	833.333	1016.67	0
	12.65	766.667	966.667	833.333	916.667	833.333	1016.67	833.333	833.333	0
	12.66	783.333	983.333	833.333	1016.67	933.333	916.667	916.667	866.667	0
	12.67	866.667	1050	983.333	866.667	966.667	733.333	1016.67	916.667	0
	12.68	883.333	1000	1050	916.667	833.333	833.333	966.667	833.333	0
	12.69	833.333	983.333	983.333	983.333	783.333	783.333	916.667	833.333	0
	12.7	816.667	883.333	950	900	866.667	666.667	900	866.667	0
	12.71	733.333	833.333	933.333	900	833.333	633.333	950	833.333	0
	12.72	616.667	766.667	850	983.333	850	683.333	1000	833.333	0
	12.73	633.333	733.333	1033.33	1100	850	783.333	1083.33	900	0
	12.74	566.667	900	1100	1083.33	950	883.333	1166.67	1033.33	0
	12.75	616.667	900	1050	983.333	1000	833.333	1050	950	0
	12.76	483.333	983.333	983.333	933.333	933.333	783.333	1100	800	0
	12.77	533.333	1033.33	1066.67	950	1033.33	750	1033.33	850	0
	12.78	933.333	1016.67	1050	1050	1000	683.333	883.333	883.333	0
	12.79	783.333	900	983.333	1150	833.333	616.667	900	750	0
	12.8	683.333	883.333	1000	1000	850	683.333	900	800	0
	12.81	650	1066.67	850	950	750	750	1016.67	700	0
	12.82	733.333	916.667	783.333	1016.67	783.333	800	1116.67	750	0
	12.83	866.667	1000	966.667	1066.67	900	850	900	750	0
	12.84	700	900	833.333	866.667	750	700	1050	633.333	0
	12.85	783.333	800	850	783.333	866.667	683.333	1016.67	800	0
	12.86	783.333	950	1016.67	683.333	783.333	733.333	1116.67	783.333	0
	12.87	700	966.667	916.667	866.667	750	700	1066.67	900	0
	12.88	750	966.667	900	1016.67	816.667	816.667	1116.67	866.667	0
	12.89	800	1033.33	900	816.667	816.667	850	1016.67	866.667	0
	12.9	766.667	1300	966.667	750	916.667	683.333	950	1066.67	0
	12.91	766.667	1166.67	800	750	900	716.667	816.667	950	0
	12.92	800	1033.33	716.667	850	816.667	816.667	900	800	0
	12.93	866.667	1016.67	900	900	816.667	750	1016.67	933.333	0
	12.94	816.667	983.333	1083.33	916.667	866.667	800	1083.33	966.667	0
	12.95	716.667	1083.33	1033.33	966.667	916.667	700	866.667	916.667	0
	12.96	750	1016.67	866.667	966.667	983.333	600	966.667	700	0
	12.97	800	933.333	866.667	866.667	1050	766.667	1133.33	633.333	0
	12.98	800	866.667	933.333	966.667	866.667	866.667	1133.33	766.667	0
	12.99	666.667	766.667	983.333	983.333	866.667	800	1216.67	666.667	0
	13	583.333	816.667	916.667	1050	833.333	816.667	1133.33	816.667	0
	13.01	783.333	766.667	866.667	933.333	933.333	750	983.333	716.667	0
	13.02	783.333	816.667	950	833.333	866.667	700	916.667	766.667	0
	13.03	600	983.333	983.333	1033.33	766.667	600	933.333	933.333	0
	13.04	783.333	983.333	833.333	933.333	916.667	833.333	1116.67	916.667	0
	13.05	650	983.333	950	950	950	866.667	1083.33	833.333	0
	13.06	533.333	783.333	1000	933.333	933.333	783.333	1150	933.333	0
	13.07	783.333	866.667	1066.67	983.333	700	766.667	950	833.333	0
	13.08	833.333	833.333	1000	833.333	833.333	716.667	983.333	833.333	0
	13.09	666.667	833.333	900	950	950	783.333	1050	883.333	0
	13.1	650	933.333	983.333	1050	850	850	950	816.667	0
	13.11	733.333	933.333	900	1000	766.667	783.333	850	833.333	0
	13.12	800	883.333	966.667	933.333	683.333	716.667	1066.67	933.333	0
	13.13	733.333	950	933.333	966.667	716.667	733.333	1116.67	766.667	0
	13.14	683.333	1050	766.667	1066.67	783.333	766.667	950	766.667	0
	13.15	733.333	883.333	833.333	1066.67	1000	833.333	1116.67	800	0
	13.16	666.667	916.667	883.333	1000	1066.67	750	1083.33	750	0
	13.17	733.333	1000	850	783.333	1066.67	750	833.333	800	0
	13.18	850	1066.67	950	833.333	1000	800	900	883.333	0
	13.19	716.667	1016.67	1116.67	850	950	783.333	866.667	916.667	0
	13.2	616.667	916.667	966.667	916.667	1033.33	716.667	866.667	866.667	0
	13.21	800	833.333	983.333	983.333	966.667	916.667	850	950	0
	13.22	783.333	900	1066.67	983.333	866.667	783.333	850	733.333	0
	13.23	783.333	966.667	1016.67	1016.67	1016.67	683.333	1133.33	550	0
	13.24	800	950	950	950	850	733.333	1083.33	666.667	0
	13.25	850	866.667	966.667	1133.33	800	800	983.333	683.333	0
	13.26	566.667	933.333	966.667	1133.33	983.333	633.333	900	750	0
	13.27	616.667	933.333	1033.33	1033.33	1083.33	633.333	933.333	966.667	0
	13.28	750	1033.33	1033.33	816.667	900	700	1016.67	1016.67	0
	13.29	750	983.333	983.333	733.333	883.333	766.667	1016.67	883.333	0
	13.3	633.333	916.667	966.667	750	983.333	883.333	850	983.333	0
	13.31	683.333	933.333	916.667	883.333	966.667	883.333	1083.33	816.667	0
	13.32	733.333	1150	866.667	800	983.333	700	1116.67	816.667	0
	13.33	766.667	1200	1033.33	916.667	1000	700	1166.67	766.667	0
	13.34	800	933.333	983.333	916.667	1033.33	750	1150	800	0
	13.35	800	916.667	883.333	833.333	983.333	766.667	1066.67	833.333	0
	13.36	866.667	1050	833.333	766.667	833.333	766.667	950	816.667	0
	13.37	800	1033.33	816.667	833.333	833.333	866.667	883.333	700	0
	13.38	600	883.333	1066.67	883.333	1050	983.333	866.667	816.667	0
	13.39	650	933.333	950	1050	1133.33	866.667	900	816.667	0
	13.4	716.667	950	866.667	1016.67	866.667	950	833.333	666.667	0
	13.41	666.667	1116.67	766.667	1050	716.667	933.333	866.667	666.667	0
	13.42	650	1050	766.667	900	866.667	866.667	883.333	766.667	0
	13.43	666.667	1050	900	866.667	983.333	766.667	900	833.333	0
	13.44	633.333	866.667	1116.67	900	766.667	600	866.667	933.333	0
	13.45	516.667	766.667	1016.67	950	1000	783.333	816.667	900	0
	13.46	633.333	766.667	1083.33	950	1083.33	783.333	900	816.667	0
	13.47	650	850	933.333	950	950	733.333	1000	833.333	0
	13.48	716.667	1016.67	1133.33	1116.67	883.333	816.667	1000	833.333	0
	13.49	733.333	883.333	1016.67	966.667	950	783.333	966.667	783.333	0
	13.5	766.667	900	1016.67	916.667	966.667	666.667	950	833.333	0
	13.51	766.667	850	916.667	1133.33	966.667	650	900	833.333	0
	13.52	766.667	883.333	950	1216.67	916.667	700	850	883.333	0
	13.53	650	850	1033.33	1033.33	966.667	800	900	850	0
	13.54	666.667	800	1033.33	966.667	916.667	733.333	1066.67	800	0
	13.55	800	800	1066.67	800	950	733.333	983.333	833.333	0
	13.56	783.333	950	1100	733.333	966.667	716.667	966.667	783.333	0
	13.57	716.667	1016.67	1033.33	783.333	800	666.667	1100	833.333	0
	13.58	666.667	1150	966.667	1033.33	800	716.667	983.333	916.667	0
	13.59	716.667	983.333	900	1016.67	850	800	1016.67	833.333	0
	13.6	716.667	1016.67	850	966.667	850	800	1100	933.333	0
	13.61	566.667	1033.33	783.333	983.333	866.667	750	966.667	800	0
	13.62	633.333	900	983.333	800	900	800	783.333	850	0
	13.63	716.667	866.667	1033.33	733.333	933.333	850	1116.67	850	0
	13.64	750	916.667	983.333	1100	1050	1000	983.333	1000	0
	13.65	733.333	866.667	850	1066.67	816.667	1050	1100	966.667	0
	13.66	750	1000	783.333	1033.33	750	850	1050	983.333	0
	13.67	700	916.667	983.333	916.667	916.667	866.667	1116.67	916.667	0
	13.68	783.333	916.667	1000	916.667	1100	750	1066.67	850	0
	13.69	616.667	1066.67	950	866.667	866.667	750	816.667	766.667	0
	13.7	566.667	1066.67	950	1016.67	866.667	733.333	916.667	800	0
	13.71	666.667	950	1100	983.333	983.333	683.333	983.333	800	0
	13.72	700	833.333	1016.67	866.667	933.333	733.333	1133.33	866.667	0
	13.73	700	866.667	1050	916.667	833.333	800	1000	866.667	0
	13.74	633.333	933.333	1000	950	866.667	733.333	950	816.667	0
	13.75	700	933.333	1016.67	1000	900	700	1000	950	0
	13.76	766.667	866.667	1150	1133.33	950	750	950	866.667	0
	13.77	683.333	966.667	1200	1050	933.333	750	900	800	0
	13.78	716.667	966.667	1016.67	966.667	866.667	700	900	833.333	0
	13.79	783.333	966.667	1083.33	966.667	966.667	766.667	933.333	1016.67	0
	13.8	683.333	1016.67	933.333	833.333	950	750	783.333	1000	0
	13.81	550	1066.67	816.667	783.333	883.333	700	883.333	833.333	0
	13.82	466.667	1133.33	833.333	900	900	716.667	950	833.333	0
	13.83	633.333	1016.67	1083.33	1066.67	900	716.667	1066.67	850	0
	13.84	783.333	883.333	1016.67	1066.67	1016.67	766.667	1066.67	1033.33	0
	13.85	783.333	883.333	983.333	1033.33	1016.67	850	1016.67	983.333	0
	13.86	750	1016.67	1050	1033.33	1050	766.667	983.333	916.667	0
	13.87	650	1116.67	916.667	1050	1150	916.667	1050	783.333	0
	13.88	666.667	950	966.667	966.667	1116.67	833.333	1016.67	766.667	0
	13.89	766.667	916.667	1016.67	1050	883.333	766.667	816.667	883.333	0
	13.9	666.667	883.333	1100	900	716.667	900	883.333	916.667	0
	13.91	666.667	916.667	1016.67	866.667	850	966.667	966.667	866.667	0
	13.92	600	933.333	966.667	1100	900	933.333	916.667	983.333	0
	13.93	566.667	933.333	1166.67	983.333	966.667	850	900	916.667	0
	13.94	700	800	1066.67	983.333	933.333	800	766.667	783.333	0
	13.95	850	900	916.667	966.667	1133.33	850	783.333	666.667	0
	13.96	866.667	966.667	866.667	1000	1066.67	866.667	916.667	866.667	0
	13.97	716.667	916.667	983.333	1000	916.667	733.333	966.667	833.333	0
	13.98	716.667	866.667	966.667	1050	833.333	616.667	916.667	733.333	0
	13.99	750	933.333	966.667	1100	850	650	1050	850	0
	14	800	1100	1100	950	866.667	800	1266.67	816.667	0
	14.01	716.667	1066.67	1083.33	866.667	816.667	750	1150	750	0
	14.02	716.667	1066.67	883.333	883.333	866.667	783.333	816.667	883.333	0
	14.03	683.333	950	933.333	916.667	883.333	883.333	950	850	0
	14.04	883.333	983.333	983.333	1050	933.333	866.667	1083.33	950	0
	14.05	816.667	916.667	1083.33	916.667	950	816.667	1116.67	1083.33	0
	14.06	883.333	933.333	883.333	883.333	950	816.667	1133.33	866.667	0
	14.07	783.333	950	950	1016.67	1083.33	650	1166.67	850	0
	14.08	866.667	1166.67	1016.67	866.667	900	650	1216.67	816.667	0
	14.09	800	1100	1066.67	883.333	750	766.667	1083.33	816.667	0
	14.1	633.333	966.667	933.333	1000	766.667	816.667	966.667	750	0
	14.11	666.667	883.333	950	966.667	966.667	866.667	1033.33	833.333	0
	14.12	566.667	950	866.667	900	1000	900	1033.33	833.333	0
	14.13	566.667	1033.33	866.667	966.667	1033.33	883.333	1016.67	966.667	0
	14.14	616.667	1016.67	1150	1100	900	816.667	900	950	0
	14.15	666.667	883.333	1166.67	1150	966.667	866.667	833.333	900	0
	14.16	683.333	883.333	1033.33	1100	966.667	866.667	866.667	866.667	0
	14.17	633.333	983.333	950	1050	833.333	816.667	916.667	950	0
	14.18	600	983.333	983.333	983.333	833.333	750	1033.33	916.667	0
	14.19	550	950	950	916.667	983.333	733.333	1050	850	0
	14.2	600	883.333	816.667	883.333	1016.67	666.667	983.333	883.333	0
	14.21	616.667	850	816.667	883.333	883.333	683.333	916.667	833.333	0
	14.22	566.667	883.333	883.333	950	966.667	716.667	950	983.333	0
	14.23	616.667	1100	1033.33	1016.67	983.333	750	950	1133.33	0
	14.24	633.333	1200	1000	850	983.333	883.333	900	1033.33	0
	14.25	650	1116.67	966.667	766.667	933.333	933.333	850	883.333	0
	14.26	700	933.333	916.667	966.667	966.667	916.667	883.333	766.667	0
	14.27	583.333	1066.67	1033.33	1166.67	916.667	916.667	1116.67	900	0
	14.28	683.333	966.667	1183.33	1133.33	783.333	966.667	1033.33	800	0
	14.29	800	850	1083.33	1000	916.667	1000	966.667	766.667	0
	14.3	683.333	933.333	916.667	850	850	1000	1000	916.667	0
	14.31	683.333	1000	933.333	800	716.667	833.333	933.333	916.667	0
	14.32	700	1016.67	1050	1016.67	800	833.333	1183.33	833.333	0
	14.33	700	900	983.333	1050	1066.67	866.667	1116.67	800	0
	14.34	650	900	1083.33	1083.33	983.333	766.667	1050	933.333	0
	14.35	733.333	933.333	1016.67	916.667	983.333	783.333	1016.67	883.333	0
	14.36	883.333	1016.67	1083.33	1000	983.333	833.333	983.333	850	0
	14.37	850	1050	1150	1016.67	883.333	800	1016.67	983.333	0
	14.38	700	1000	1083.33	1016.67	983.333	816.667	1100	933.333	0
	14.39	700	883.333	916.667	1016.67	1033.33	866.667	1016.67	866.667	0
	14.4	666.667	950	933.333	883.333	1016.67	1016.67	950	966.667	0
	14.41	650	950	1016.67	883.333	966.667	1150	916.667	1016.67	0
	14.42	733.333	750	1016.67	1066.67	950	1066.67	916.667	1083.33	0
	14.43	733.333	666.667	900	1083.33	883.333	850	1016.67	966.667	0
	14.44	650	850	1000	1016.67	866.667	800	1033.33	733.333	0
	14.45	666.667	1083.33	883.333	1033.33	950	850	1083.33	950	0
	14.46	666.667	1033.33	966.667	1050	1100	750	1200	1000	0
	14.47	600	950	1116.67	1016.67	1083.33	866.667	1050	833.333	0
	14.48	683.333	1033.33	1100	966.667	950	933.333	1016.67	900	0
	14.49	666.667	966.667	1016.67	966.667	883.333	816.667	1016.67	833.333	0
	14.5	600	883.333	950	950	933.333	666.667	1016.67	933.333	0
	14.51	566.667	950	1050	833.333	983.333	733.333	1050	1083.33	0
	14.52	600	1016.67	1183.33	833.333	866.667	883.333	966.667	900	0
	14.53	583.333	966.667	1100	883.333	916.667	916.667	966.667	866.667	0
	14.54	650	1050	966.667	900	833.333	950	1066.67	966.667	0
	14.55	683.333	1066.67	966.667	1050	1066.67	833.333	1133.33	966.667	0
	14.56	666.667	1033.33	1100	1133.33	1100	850	1050	916.667	0
	14.57	700	1050	1033.33	1050	916.667	883.333	1116.67	950	0
	14.58	683.333	933.333	983.333	1066.67	900	816.667	1033.33	1116.67	0
	14.59	700	900	1083.33	983.333	850	883.333	983.333	933.333	0
	14.6	750	1000	1116.67	933.333	750	883.333	1000	883.333	0
	14.61	616.667	1066.67	1216.67	1050	833.333	750	1050	933.333	0
	14.62	533.333	900	1066.67	1133.33	916.667	600	1050	833.333	0
	14.63	666.667	866.667	1016.67	1166.67	866.667	766.667	1016.67	833.333	0
	14.64	750	983.333	1050	1066.67	966.667	850	966.667	866.667	0
	14.65	750	833.333	983.333	1083.33	850	783.333	900	1000	0
	14.66	700	833.333	866.667	1150	766.667	933.333	1050	1000	0
	14.67	616.667	1000	850	1000	900	983.333	1016.67	933.333	0
	14.68	783.333	1000	950	1066.67	933.333	850	1033.33	916.667	0
	14.69	800	1033.33	933.333	1100	933.333	916.667	1150	1016.67	0
	14.7	716.667	1083.33	1000	1100	916.667	916.667	1083.33	916.667	0
	14.71	650	983.333	883.333	1000	950	950	950	833.333	0
	14.72	700	1100	883.333	1033.33	933.333	916.667	1016.67	766.667	0
	14.73	733.333	1033.33	1016.67	1033.33	966.667	800	1150	916.667	0
	14.74	700	966.667	1033.33	1000	1166.67	866.667	1016.67	966.667	0
	14.75	716.667	1016.67	1016.67	950	1050	850	950	866.667	0
	14.76	866.667	1083.33	1016.67	1050	916.667	816.667	766.667	800	0
	14.77	800	1050	966.667	1100	850	733.333	800	766.667	0
	14.78	883.333	950	950	1116.67	950	766.667	950	850	0
	14.79	766.667	900	1033.33	1016.67	1033.33	816.667	866.667	900	0
	14.8	700	966.667	1166.67	1050	1016.67	850	900	816.667	0
	14.81	733.333	883.333	1216.67	1100	900	883.333	1033.33	900	0
	14.82	750	900	1100	983.333	716.667	866.667	1033.33	966.667	0
	14.83	800	1033.33	1200	950	700	816.667	1050	933.333	0
	14.84	750	1066.67	1066.67	1116.67	883.333	866.667	1016.67	800	0
	14.85	716.667	966.667	883.333	1100	916.667	833.333	833.333	750	0
	14.86	750	883.333	866.667	1033.33	916.667	900	833.333	783.333	0
	14.87	700	950	983.333	983.333	916.667	983.333	1050	750	0
	14.88	700	983.333	1133.33	1033.33	916.667	900	1216.67	800	0
	14.89	733.333	1000	1150	833.333	983.333	950	1083.33	733.333	0
	14.9	816.667	1033.33	1133.33	916.667	883.333	950	966.667	650	0
	14.91	833.333	1200	1066.67	1050	833.333	1066.67	900	733.333	0
	14.92	716.667	1216.67	933.333	1083.33	983.333	1050	1050	816.667	0
	14.93	666.667	1183.33	933.333	1016.67	1050	983.333	1000	850	0
	14.94	750	1133.33	1000	916.667	850	1066.67	1133.33	916.667	0
	14.95	550	1050	1066.67	1000	816.667	983.333	1250	883.333	0
	14.96	633.333	883.333	883.333	1083.33	816.667	800	1050	900	0
	14.97	833.333	933.333	883.333	1016.67	816.667	816.667	1050	850	0
	14.98	733.333	1016.67	866.667	983.333	1066.67	866.667	1100	783.333	0
	14.99	733.333	1000	850	983.333	1066.67	816.667	950	850	0
	15	666.667	866.667	950	1016.67	1000	733.333	950	783.333	0
	15.01	583.333	983.333	1033.33	900	1100	816.667	850	816.667	0
	15.02	683.333	983.333	1116.67	866.667	916.667	866.667	900	816.667	0
	15.03	766.667	1000	1100	933.333	750	766.667	916.667	833.333	0
	15.04	733.333	866.667	983.333	1000	750	833.333	916.667	866.667	0
	15.05	600	866.667	966.667	1016.67	783.333	883.333	916.667	833.333	0
	15.06	500	1016.67	1033.33	966.667	916.667	1000	800	950	0
	15.07	533.333	933.333	1033.33	916.667	933.333	1016.67	866.667	966.667	0
	15.08	683.333	933.333	1100	1000	966.667	966.667	933.333	916.667	0
	15.09	616.667	1033.33	1000	1183.33	1016.67	1000	1133.33	966.667	0
	15.1	700	1050	866.667	1050	1050	916.667	1150	933.333	0
	15.11	716.667	1016.67	950	916.667	1100	833.333	1116.67	866.667	0
	15.12	766.667	1050	1033.33	983.333	933.333	783.333	1050	1050	0
	15.13	716.667	1116.67	1100	933.333	1033.33	883.333	1100	983.333	0
	15.14	683.333	1233.33	866.667	883.333	1116.67	816.667	1066.67	933.333	0
	15.15	616.667	1366.67	950	950	1033.33	866.667	1033.33	900	0
	15.16	633.333	1133.33	900	966.667	983.333	816.667	1050	933.333	0
	15.17	650	1033.33	1000	933.333	1133.33	850	1133.33	950	0
	15.18	766.667	866.667	1216.67	883.333	1000	800	1200	783.333	0
	15.19	683.333	966.667	1183.33	966.667	850	800	1166.67	766.667	0
	15.2	616.667	1166.67	1116.67	816.667	883.333	850	1150	816.667	0
	15.21	633.333	1100	1150	800	816.667	683.333	983.333	916.667	0
	15.22	600	1033.33	1050	966.667	866.667	650	816.667	883.333	0
	15.23	633.333	1000	916.667	1066.67	966.667	816.667	1000	916.667	0
	15.24	633.333	1016.67	883.333	1000	1083.33	883.333	1166.67	916.667	0
	15.25	600	1016.67	933.333	916.667	1083.33	866.667	1050	866.667	0
	15.26	616.667	1016.67	983.333	916.667	1200	883.333	1000	916.667	0
	15.27	716.667	1050	966.667	883.333	1200	966.667	1100	966.667	0
	15.28	733.333	1066.67	1033.33	1033.33	1033.33	916.667	1100	916.667	0
	15.29	716.667	1066.67	1100	1016.67	916.667	750	1166.67	850	0
	15.3	633.333	1066.67	1033.33	966.667	883.333	783.333	1166.67	800	0
	15.31	566.667	1216.67	983.333	1066.67	1016.67	850	1000	916.667	0
	15.32	616.667	1283.33	883.333	1166.67	1016.67	933.333	933.333	950	0
	15.33	666.667	1083.33	983.333	983.333	883.333	983.333	900	983.333	0
	15.34	666.667	1000	1116.67	983.333	950	1033.33	1166.67	1016.67	0
	15.35	650	1033.33	1083.33	1133.33	850	916.667	1166.67	866.667	0
	15.36	666.667	983.333	1033.33	1200	866.667	850	1016.67	866.667	0
	15.37	750	866.667	950	933.333	866.667	833.333	1033.33	916.667	0
	15.38	783.333	1050	1000	866.667	933.333	850	1033.33	900	0
	15.39	733.333	1100	900	950	833.333	933.333	1000	850	0
	15.4	683.333	1033.33	950	966.667	766.667	950	1000	766.667	0
	15.41	683.333	1033.33	966.667	950	916.667	1033.33	1033.33	733.333	0
	15.42	716.667	966.667	1033.33	1100	1116.67	1016.67	1050	816.667	0
	15.43	700	983.333	933.333	1116.67	966.667	933.333	1150	783.333	0
	15.44	633.333	1016.67	883.333	1033.33	833.333	816.667	1116.67	950	0
	15.45	633.333	950	1033.33	1133.33	850	950	983.333	1016.67	0
	15.46	683.333	983.333	1033.33	1033.33	916.667	916.667	1083.33	916.667	0
	15.47	733.333	1016.67	950	983.333	1033.33	850	1066.67	866.667	0
	15.48	683.333	983.333	950	1066.67	1066.67	883.333	1033.33	950	0
	15.49	650	1050	1166.67	950	983.333	866.667	983.333	900	0
	15.5	566.667	1083.33	1100	766.667	966.667	833.333	983.333	800	0
	15.51	566.667	1200	883.333	800	983.333	800	1000	800	0
	15.52	600	1166.67	850	983.333	950	866.667	1033.33	866.667	0
	15.53	650	1050	1000	1016.67	783.333	800	950	966.667	0
	15.54	583.333	1016.67	1183.33	816.667	816.667	866.667	983.333	883.333	0
	15.55	583.333	983.333	983.333	766.667	883.333	916.667	1050	1000	0
	15.56	583.333	1050	983.333	866.667	983.333	1000	983.333	983.333	0
	15.57	666.667	983.333	1100	1050	883.333	783.333	900	1050	0
	15.58	683.333	966.667	1000	1083.33	983.333	883.333	1083.33	1066.67	0
	15.59	600	933.333	1016.67	933.333	1033.33	816.667	1166.67	983.333	0
	15.6	600	1000	1066.67	766.667	1083.33	700	1133.33	933.333	0
	15.61	716.667	916.667	1116.67	816.667	983.333	766.667	1066.67	966.667	0
	15.62	733.333	1016.67	1116.67	1166.67	983.333	966.667	1083.33	966.667	0
	15.63	733.333	1150	983.333	1083.33	1016.67	1033.33	1100	983.333	0
	15.64	733.333	1183.33	1033.33	983.333	1033.33	1016.67	1283.33	1000	0
	15.65	633.333	1033.33	1116.67	1000	1083.33	933.333	1233.33	933.333	0
	15.66	633.333	983.333	1083.33	1116.67	950	900	983.333	900	0
	15.67	683.333	950	1133.33	1033.33	950	916.667	1133.33	950	0
	15.68	633.333	1050	1100	983.333	1000	850	1266.67	1100	0
	15.69	700	1133.33	1100	1100	1033.33	833.333	1116.67	1100	0
	15.7	733.333	1050	1033.33	1116.67	1033.33	900	1050	1050	0
	15.71	716.667	933.333	1016.67	1066.67	1133.33	900	1050	1133.33	0
	15.72	733.333	1000	1150	966.667	1166.67	833.333	1066.67	1033.33	0
	15.73	750	1033.33	1266.67	1116.67	1233.33	733.333	1016.67	1066.67	0
	15.74	666.667	1016.67	1166.67	1150	1183.33	766.667	916.667	1016.67	0
	15.75	633.333	983.333	1116.67	983.333	1116.67	1050	900	933.333	0
	15.76	700	983.333	1200	916.667	1066.67	966.667	1050	916.667	0
	15.77	700	1016.67	1050	966.667	1033.33	883.333	1183.33	883.333	0
	15.78	700	833.333	950	1050	1016.67	966.667	1033.33	883.333	0
	15.79	650	833.333	916.667	966.667	1033.33	883.333	1033.33	916.667	0
	15.8	716.667	1033.33	950	1050	950	733.333	1216.67	1083.33	0
	15.81	750	1050	1033.33	1216.67	966.667	866.667	1200	1066.67	0
	15.82	650	900	1033.33	1166.67	966.667	966.667	1050	1083.33	0
	15.83	633.333	966.667	983.333	1150	983.333	966.667	1033.33	950	0
	15.84	666.667	1000	1016.67	1083.33	883.333	900	1050	866.667	0
	15.85	616.667	1116.67	1000	966.667	833.333	883.333	1066.67	866.667	0
	15.86	616.667	1000	1000	1050	900	850	1100	883.333	0
	15.87	650	966.667	1050	1066.67	866.667	883.333	966.667	916.667	0
	15.88	650	1000	983.333	1000	966.667	950	900	866.667	0
	15.89	616.667	1183.33	983.333	1000	1133.33	900	983.333	800	0
	15.9	583.333	1150	966.667	1016.67	1183.33	866.667	1116.67	800	0
	15.91	600	966.667	983.333	1100	950	800	1150	916.667	0
	15.92	766.667	916.667	1066.67	1100	850	900	1133.33	933.333	0
	15.93	766.667	1016.67	1100	1050	866.667	983.333	1100	916.667	0
	15.94	766.667	1050	1033.33	1000	900	900	1166.67	1000	0
	15.95	683.333	1100	1016.67	1033.33	933.333	966.667	1200	983.333	0
	15.96	750	1100	983.333	966.667	866.667	983.333	1033.33	933.333	0
	15.97	866.667	1116.67	933.333	933.333	900	983.333	1050	916.667	0
	15.98	700	933.333	1066.67	1033.33	800	866.667	1150	950	0
	15.99	583.333	900	1133.33	1050	866.667	900	916.667	983.333	0
	16	700	950	1150	1016.67	1016.67	916.667	900	916.667	0
	16.01	683.333	1000	966.667	1000	1166.67	900	933.333	783.333	0
	16.02	716.667	1000	966.667	1016.67	1200	1050	950	816.667	0
	16.03	766.667	1033.33	966.667	1050	1133.33	1133.33	1066.67	950	0
	16.04	683.333	1066.67	1016.67	1050	1033.33	900	1250	900	0
	16.05	583.333	950	1050	1116.67	1033.33	816.667	1316.67	900	0
	16.06	583.333	866.667	1033.33	1083.33	966.667	816.667	1216.67	916.667	0
	16.07	583.333	866.667	1066.67	1016.67	1016.67	833.333	1066.67	1066.67	0
	16.08	583.333	950	1066.67	950	1033.33	783.333	1016.67	1150	0
	16.09	583.333	933.333	1016.67	983.333	900	733.333	916.667	1083.33	0
	16.1	566.667	966.667	1000	966.667	966.667	850	850	966.667	0
	16.11	633.333	1000	1066.67	1066.67	1116.67	1050	916.667	916.667	0
	16.12	666.667	1083.33	1050	1200	1150	1033.33	1083.33	966.667	0
	16.13	633.333	1116.67	1033.33	1150	1066.67	933.333	1200	916.667	0
	16.14	633.333	1133.33	983.333	1083.33	1083.33	850	1116.67	1000	0
	16.15	700	1166.67	966.667	1066.67	983.333	850	1000	1050	0
	16.16	633.333	1133.33	1000	1016.67	950	833.333	1100	950	0
	16.17	716.667	1083.33	1000	900	1050	883.333	1233.33	866.667	0
	16.18	766.667	1050	983.333	1083.33	983.333	1066.67	1133.33	900	0
	16.19	583.333	1083.33	1100	1133.33	933.333	1033.33	1116.67	1016.67	0
	16.2	633.333	1083.33	1083.33	900	916.667	1066.67	1066.67	983.333	0
	16.21	716.667	1100	1166.67	950	916.667	1083.33	1116.67	1000	0
	16.22	700	1150	1133.33	1033.33	1083.33	1100	1083.33	900	0
	16.23	733.333	1166.67	1116.67	950	1216.67	966.667	1000	866.667	0
	16.24	733.333	1150	1016.67	966.667	1200	1016.67	983.333	883.333	0
	16.25	650	1116.67	1033.33	933.333	1016.67	1133.33	1150	1050	0
	16.26	533.333	983.333	1133.33	1016.67	850	983.333	1050	1183.33	0
	16.27	600	900	1183.33	1250	883.333	883.333	983.333	1066.67	0
	16.28	600	1000	1066.67	1283.33	1000	866.667	1100	1066.67	0
	16.29	616.667	1100	1066.67	1183.33	1200	866.667	1116.67	1116.67	0
	16.3	650	1066.67	1150	1183.33	1300	916.667	1016.67	1033.33	0
	16.31	700	1066.67	1200	1283.33	1166.67	1000	933.333	933.333	0
	16.32	683.333	1133.33	1150	1333.33	983.333	950	983.333	933.333	0
	16.33	616.667	1166.67	1116.67	1283.33	900	783.333	1116.67	950	0
	16.34	566.667	1150	1000	1183.33	1033.33	833.333	1150	966.667	0
	16.35	650	1000	1033.33	1083.33	1050	933.333	1066.67	883.333	0
	16.36	633.333	966.667	1133.33	1000	1050	766.667	966.667	833.333	0
	16.37	650	1016.67	1050	1150	1066.67	683.333	1183.33	883.333	0
	16.38	700	983.333	950	1150	1083.33	750	1116.67	950	0
	16.39	800	1016.67	1016.67	1100	1166.67	750	966.667	1033.33	0
	16.4	766.667	1050	1066.67	1083.33	1166.67	966.667	1066.67	1033.33	0
	16.41	683.333	983.333	1083.33	1133.33	1066.67	883.333	1016.67	900	0
	16.42	716.667	1133.33	1083.33	1033.33	1100	783.333	950	866.667	0
	16.43	683.333	1200	1166.67	1033.33	983.333	800	966.667	866.667	0
	16.44	650	1083.33	1050	1116.67	933.333	850	1083.33	950	0
	16.45	566.667	900	933.333	1216.67	1100	950	966.667	950	0
	16.46	583.333	983.333	1066.67	1150	1133.33	1050	1016.67	866.667	0
	16.47	600	1133.33	1083.33	1100	1066.67	1066.67	1116.67	816.667	0
	16.48	633.333	1166.67	933.333	1050	983.333	1000	1083.33	950	0
	16.49	700	1083.33	883.333	1016.67	1066.67	933.333	1033.33	966.667	0
	16.5	783.333	1066.67	1016.67	1016.67	1166.67	850	1000	883.333	0
	16.51	750	1066.67	1016.67	1066.67	1083.33	950	1083.33	816.667	0
	16.52	616.667	1100	966.667	1133.33	1000	1016.67	1233.33	883.333	0
	16.53	616.667	1050	1050	1050	983.333	883.333	1266.67	950	0
	16.54	733.333	1183.33	1050	900	983.333	866.667	1150	900	0
	16.55	750	1316.67	1083.33	900	1033.33	850	1166.67	966.667	0
	16.56	683.333	1333.33	1116.67	1016.67	1016.67	866.667	1066.67	1050	0
	16.57	716.667	1216.67	1150	1016.67	1000	850	1100	966.667	0
	16.58	683.333	1166.67	983.333	1016.67	1016.67	850	966.667	883.333	0
	16.59	666.667	1133.33	983.333	1033.33	933.333	766.667	1000	983.333	0
	16.6	750	1216.67	1033.33	1166.67	1116.67	866.667	1150	1000	0
	16.61	800	1300	1116.67	1316.67	1216.67	933.333	1166.67	916.667	0
	16.62	650	1200	1200	1216.67	1150	933.333	1166.67	900	0
	16.63	600	1033.33	1050	1016.67	1066.67	866.667	1233.33	1000	0
	16.64	650	1050	933.333	950	1100	800	1216.67	1100	0
	16.65	683.333	1100	1066.67	983.333	1050	783.333	1200	933.333	0
	16.66	750	1000	1166.67	1066.67	1083.33	883.333	1166.67	883.333	0
	16.67	766.667	1050	1200	1000	1150	950	1216.67	1033.33	0
	16.68	666.667	1116.67	1066.67	1016.67	1200	933.333	1350	1083.33	0
	16.69	633.333	1116.67	1050	1133.33	1200	933.333	1200	966.667	0
	16.7	733.333	1050	1050	1083.33	1083.33	800	1116.67	866.667	0
	16.71	783.333	950	1216.67	1100	933.333	833.333	1183.33	883.333	0
	16.72	683.333	916.667	1283.33	1066.67	1050	883.333	1200	1083.33	0
	16.73	600	1000	1116.67	1000	1100	866.667	1266.67	1066.67	0
	16.74	583.333	1116.67	1133.33	1000	1050	883.333	1183.33	950	0
	16.75	633.333	1066.67	1316.67	983.333	983.333	1066.67	1083.33	916.667	0
	16.76	666.667	1133.33	1366.67	1016.67	833.333	1100	1133.33	900	0
	16.77	616.667	1133.33	1333.33	1083.33	783.333	983.333	1216.67	933.333	0
	16.78	550	1016.67	1300	1216.67	933.333	916.667	1233.33	1000	0
	16.79	550	1033.33	1150	1166.67	1066.67	983.333	1250	1083.33	0
	16.8	633.333	1033.33	1066.67	1133.33	1133.33	1033.33	1133.33	1083.33	0
	16.81	766.667	1166.67	1066.67	1033.33	1066.67	1033.33	1066.67	1033.33	0
	16.82	716.667	1166.67	950	1033.33	1133.33	933.333	1150	1000	0
	16.83	633.333	1116.67	850	1116.67	1133.33	833.333	1183.33	1000	0
	16.84	566.667	1100	1083.33	1266.67	933.333	866.667	1033.33	1050	0
	16.85	600	1183.33	1266.67	1183.33	850	933.333	1066.67	1016.67	0
	16.86	600	1100	1216.67	1150	866.667	1016.67	950	1066.67	0
	16.87	533.333	983.333	1216.67	1100	1066.67	1150	866.667	1050	0
	16.88	516.667	1066.67	1233.33	1016.67	1066.67	1166.67	1016.67	916.667	0
	16.89	500	1116.67	1216.67	1083.33	1033.33	1083.33	1033.33	900	0
	16.9	533.333	1083.33	1233.33	1066.67	1083.33	916.667	1083.33	983.333	0
	16.91	583.333	1083.33	1300	1216.67	1083.33	966.667	1216.67	1083.33	0
	16.92	666.667	1000	1233.33	1200	1133.33	1066.67	1250	1066.67	0
	16.93	716.667	1000	1133.33	1100	1083.33	1016.67	1166.67	1000	0
	16.94	683.333	1083.33	1000	1150	1000	966.667	1033.33	1033.33	0
	16.95	716.667	1083.33	1066.67	1100	1000	933.333	1000	1116.67	0
	16.96	716.667	1050	1266.67	1066.67	983.333	1016.67	933.333	1166.67	0
	16.97	650	1116.67	1233.33	950	933.333	1033.33	1016.67	1100	0
	16.98	700	1100	1200	933.333	1033.33	950	1050	966.667	0
	16.99	766.667	1100	1116.67	1050	1066.67	966.667	1050	1000	0
	17	766.667	1066.67	1066.67	1050	1183.33	900	950	933.333	0
	17.01	683.333	1066.67	1150	1033.33	1216.67	833.333	950	866.667	0
	17.02	600	1050	1200	1066.67	1050	883.333	983.333	850	0
	17.03	616.667	1066.67	1216.67	1166.67	983.333	933.333	1050	783.333	0
	17.04	750	1100	1183.33	1100	1100	983.333	1050	983.333	0
	17.05	883.333	1066.67	1233.33	1000	1133.33	1033.33	1266.67	1233.33	0
	17.06	883.333	1100	1283.33	1133.33	1133.33	1100	1250	1166.67	0
	17.07	800	983.333	1183.33	1100	1066.67	1066.67	1233.33	1016.67	0
	17.08	766.667	1050	1050	1133.33	933.333	966.667	1183.33	966.667	0
	17.09	616.667	1033.33	1000	1150	966.667	1066.67	1133.33	1066.67	0
	17.1	650	983.333	1033.33	1200	1116.67	983.333	1183.33	1166.67	0
	17.11	650	933.333	1150	1200	1150	933.333	1183.33	1216.67	0
	17.12	600	883.333	1183.33	1100	1083.33	966.667	1083.33	1166.67	0
	17.13	650	933.333	1133.33	1033.33	1083.33	1016.67	1150	1100	0
	17.14	833.333	1050	1133.33	1116.67	1116.67	1000	1150	1050	0
	17.15	816.667	1033.33	1066.67	1166.67	1116.67	916.667	1150	1000	0
	17.16	750	1100	966.667	1050	916.667	983.333	1200	866.667	0
	17.17	716.667	1200	1016.67	1066.67	950	1083.33	1216.67	850	0
	17.18	683.333	1316.67	1050	1133.33	1066.67	1050	1066.67	966.667	0
	17.19	783.333	1283.33	1033.33	1000	1083.33	983.333	966.667	1100	0
	17.2	816.667	1200	1150	1016.67	1233.33	866.667	1200	1083.33	0
	17.21	750	1050	1300	1133.33	1166.67	866.667	1250	1033.33	0
	17.22	616.667	1000	1216.67	1216.67	1050	900	1233.33	1116.67	0
	17.23	550	1066.67	1066.67	1200	1116.67	883.333	1283.33	1166.67	0
	17.24	583.333	1250	1033.33	1083.33	1083.33	816.667	1266.67	1166.67	0
	17.25	666.667	1333.33	1083.33	983.333	1033.33	966.667	1233.33	983.333	0
	17.26	700	1233.33	1100	966.667	1000	1000	1266.67	1016.67	0
	17.27	783.333	1083.33	1100	966.667	1100	866.667	1233.33	1116.67	0
	17.28	733.333	1150	1116.67	1066.67	1133.33	866.667	1250	1100	0
	17.29	683.333	1283.33	1116.67	1150	1033.33	1033.33	1166.67	1066.67	0
	17.3	733.333	1066.67	1166.67	1116.67	1033.33	1066.67	1183.33	1116.67	0
	17.31	683.333	1016.67	1100	1116.67	1116.67	1066.67	1250	1133.33	0
	17.32	533.333	1183.33	1033.33	1100	1083.33	950	1366.67	1116.67	0
	17.33	616.667	1166.67	1083.33	966.667	1133.33	933.333	1416.67	1016.67	0
	17.34	700	1050	1100	933.333	1133.33	1016.67	1266.67	933.333	0
	17.35	716.667	1066.67	1100	1116.67	1033.33	1050	1183.33	1050	0
	17.36	733.333	1116.67	1083.33	1183.33	1033.33	966.667	1183.33	1050	0
	17.37	600	1166.67	1116.67	1133.33	1066.67	916.667	1283.33	933.333	0
	17.38	550	1283.33	1150	1100	1083.33	933.333	1316.67	950	0
	17.39	666.667	1233.33	1083.33	1166.67	1133.33	1016.67	1233.33	1133.33	0
	17.4	666.667	1116.67	950	1233.33	1083.33	1066.67	1216.67	1083.33	0
	17.41	666.667	1016.67	1066.67	1250	1133.33	983.333	1250	1016.67	0
	17.42	683.333	1033.33	1083.33	1216.67	1233.33	950	1250	1100	0
	17.43	666.667	1166.67	1083.33	1116.67	1183.33	1050	1250	1150	0
	17.44	650	1116.67	1116.67	1066.67	1100	1100	1116.67	1183.33	0
	17.45	633.333	933.333	1150	1133.33	1016.67	1016.67	1050	1150	0
	17.46	633.333	950	1150	1133.33	1066.67	1116.67	1116.67	1066.67	0
	17.47	633.333	1133.33	1133.33	1083.33	1150	1066.67	1233.33	1016.67	0
	17.48	600	1133.33	1183.33	1100	1150	1166.67	1200	1083.33	0
	17.49	600	983.333	1250	1016.67	1066.67	1100	1083.33	1166.67	0
	17.5	666.667	933.333	1150	866.667	1083.33	1033.33	1050	1150	0
	17.51	683.333	983.333	1250	950	1066.67	983.333	1200	1033.33	0
	17.52	616.667	966.667	1316.67	1083.33	1066.67	933.333	1200	1033.33	0
	17.53	600	1116.67	1283.33	1200	1000	916.667	1200	1066.67	0
	17.54	550	1200	1200	1200	950	866.667	1216.67	1050	0
	17.55	550	1100	1150	1066.67	1100	933.333	1166.67	1100	0
	17.56	583.333	1116.67	1250	966.667	1216.67	1016.67	1166.67	1016.67	0
	17.57	650	1183.33	1250	1033.33	1133.33	1016.67	1266.67	950	0
	17.58	783.333	1300	1150	1150	1116.67	983.333	1350	1000	0
	17.59	733.333	1300	1100	1233.33	1150	900	1266.67	966.667	0
	17.6	633.333	1100	1050	1150	1133.33	966.667	1166.67	966.667	0
	17.61	600	966.667	1066.67	1083.33	1066.67	1000	1183.33	1033.33	0
	17.62	550	966.667	1166.67	1100	1133.33	983.333	1116.67	1066.67	0
	17.63	466.667	1050	1116.67	1216.67	1033.33	1000	1066.67	1100	0
	17.64	550	1150	1083.33	1283.33	916.667	916.667	1100	1066.67	0
	17.65	600	1083.33	1166.67	1216.67	1050	866.667	1133.33	1066.67	0
	17.66	633.333	1050	1216.67	1083.33	1183.33	1016.67	1100	1133.33	0
	17.67	666.667	1133.33	1233.33	1050	1166.67	1116.67	1000	1100	0
	17.68	716.667	1066.67	1150	1066.67	1116.67	1000	1066.67	1083.33	0
	17.69	716.667	1050	1200	1033.33	1133.33	966.667	1300	1116.67	0
	17.7	683.333	1066.67	1333.33	1083.33	1116.67	1000	1283.33	1050	0
	17.71	833.333	1100	1366.67	1250	966.667	1050	1300	950	0
	17.72	883.333	1166.67	1216.67	1233.33	933.333	1116.67	1116.67	950	0
	17.73	833.333	1150	1233.33	1116.67	1033.33	1033.33	1083.33	1016.67	0
	17.74	700	1150	1233.33	1116.67	1100	1016.67	1133.33	1016.67	0
	17.75	700	1150	1133.33	1200	1050	1083.33	1133.33	933.333	0
	17.76	633.333	1233.33	1200	1283.33	1050	1066.67	1166.67	966.667	0
	17.77	516.667	1350	1133.33	1333.33	1150	1000	1183.33	983.333	0
	17.78	550	1350	1033.33	1350	1216.67	950	1216.67	1000	0
	17.79	616.667	1200	1133.33	1366.67	1133.33	1050	1250	1083.33	0
	17.8	583.333	1200	1166.67	1233.33	1133.33	1133.33	1166.67	1183.33	0
	17.81	533.333	1316.67	1116.67	1083.33	1166.67	1066.67	1233.33	1233.33	0
	17.82	650	1250	1233.33	1150	1150	950	1366.67	1216.67	0
	17.83	783.333	1116.67	1283.33	1316.67	1116.67	933.333	1316.67	1133.33	0
	17.84	700	1083.33	1216.67	1300	1150	950	1250	1000	0
	17.85	600	1116.67	1316.67	1150	1100	1066.67	1183.33	1083.33	0
	17.86	550	1033.33	1300	1183.33	1100	1083.33	1283.33	1183.33	0
	17.87	633.333	1016.67	1316.67	1283.33	1033.33	1050	1300	1150	0
	17.88	650	1100	1333.33	1333.33	983.333	1000	1333.33	1250	0
	17.89	616.667	1000	1283.33	1316.67	1050	933.333	1416.67	1233.33	0
	17.9	683.333	1033.33	1250	1316.67	1016.67	916.667	1350	1233.33	0
	17.91	750	1066.67	1366.67	1300	1066.67	983.333	1316.67	1250	0
	17.92	666.667	1116.67	1450	1233.33	1116.67	1116.67	1350	1183.33	0
	17.93	583.333	1166.67	1300	1333.33	1016.67	1016.67	1316.67	1133.33	0
	17.94	550	1133.33	1133.33	1200	1050	1000	1383.33	1016.67	0
	17.95	566.667	1083.33	1150	1050	1150	1183.33	1500	966.667	0
	17.96	683.333	1100	1216.67	1133.33	1200	1150	1416.67	1033.33	0
	17.97	700	1033.33	1233.33	1266.67	1300	1066.67	1316.67	1150	0
	17.98	650	1083.33	1333.33	1233.33	1416.67	1000	1283.33	1066.67	0
	17.99	616.667	1250	1333.33	1233.33	1333.33	883.333	1283.33	1033.33	0
	18	616.667	1233.33	1233.33	1400	1150	866.667	1266.67	1083.33	0
	18.01	633.333	1166.67	1216.67	1316.67	1083.33	1033.33	1300	1116.67	0
	18.02	683.333	1116.67	1183.33	1166.67	1066.67	1233.33	1266.67	1166.67	0
	18.03	650	1233.33	1133.33	1116.67	1050	1116.67	1250	1166.67	0
	18.04	633.333	1283.33	1216.67	1050	1200	1033.33	1200	1083.33	0
	18.05	666.667	1233.33	1233.33	1000	1316.67	1100	1216.67	1083.33	0
	18.06	700	1216.67	1200	1133.33	1316.67	1100	1183.33	1183.33	0
	18.07	616.667	1266.67	1216.67	1333.33	1316.67	1050	1183.33	1283.33	0
	18.08	633.333	1316.67	1150	1233.33	1333.33	1050	1283.33	1250	0
	18.09	683.333	1400	1116.67	1100	1300	983.333	1433.33	1116.67	0
	18.1	600	1416.67	1216.67	1133.33	1400	916.667	1316.67	1050	0
	18.11	566.667	1333.33	1116.67	1216.67	1150	983.333	1216.67	1116.67	0
	18.12	650	1366.67	1066.67	1216.67	933.333	1033.33	1216.67	1183.33	0
	18.13	666.667	1333.33	1183.33	1133.33	983.333	1050	1183.33	1100	0
	18.14	633.333	1300	1300	1183.33	1116.67	1116.67	1450	1083.33	0
	18.15	616.667	1250	1400	1266.67	1200	1050	1466.67	1166.67	0
	18.16	600	1133.33	1450	1183.33	1250	1000	1283.33	1116.67	0
	18.17	616.667	1133.33	1533.33	1216.67	1250	1166.67	1266.67	1116.67	0
	18.18	666.667	1133.33	1533.33	1316.67	1250	1200	1350	1200	0
	18.19	733.333	1116.67	1466.67	1166.67	1266.67	1150	1416.67	1166.67	0
	18.2	650	1083.33	1416.67	1100	1183.33	1116.67	1283.33	1150	0
	18.21	500	1150	1183.33	1216.67	983.333	1166.67	1233.33	1150	0
	18.22	500	1316.67	950	1200	950	1233.33	1316.67	1150	0
	18.23	600	1300	1083.33	1183.33	1133.33	1100	1300	1083.33	0
	18.24	650	1266.67	1250	1183.33	1216.67	1033.33	1333.33	1050	0
	18.25	633.333	1333.33	1300	1116.67	1133.33	1133.33	1350	1083.33	0
	18.26	650	1250	1400	1083.33	1100	1216.67	1366.67	1066.67	0
	18.27	633.333	1333.33	1333.33	1166.67	1116.67	1150	1500	1166.67	0
	18.28	633.333	1350	1116.67	1183.33	1066.67	1000	1516.67	1133.33	0
	18.29	600	1383.33	1150	1166.67	1033.33	1066.67	1383.33	1066.67	0
	18.3	650	1483.33	1266.67	1183.33	1166.67	1233.33	1383.33	1200	0
	18.31	666.667	1316.67	1250	1166.67	1400	1233.33	1383.33	1166.67	0
	18.32	616.667	1166.67	1116.67	1266.67	1366.67	1100	1300	1066.67	0
	18.33	700	1266.67	1266.67	1216.67	1183.33	1166.67	1383.33	1150	0
	18.34	666.667	1283.33	1316.67	1100	1233.33	1200	1366.67	1216.67	0
	18.35	483.333	1350	1216.67	1116.67	1283.33	1116.67	1266.67	1233.33	0
	18.36	550	1350	1183.33	1166.67	1300	1150	1283.33	1216.67	0
	18.37	733.333	1216.67	1100	1300	1300	1166.67	1300	1150	0
	18.38	716.667	1150	1133.33	1300	1233.33	1166.67	1400	1150	0
	18.39	650	1250	1150	1200	1266.67	1016.67	1350	1150	0
	18.4	616.667	1300	1133.33	1216.67	1283.33	966.667	1283.33	1116.67	0
	18.41	616.667	1216.67	1100	1233.33	1166.67	1100	1316.67	1083.33	0
	18.42	683.333	1166.67	1083.33	1200	1083.33	1183.33	1450	1116.67	0
	18.43	733.333	1150	1233.33	1183.33	1116.67	1150	1400	1116.67	0
	18.44	750	1133.33	1283.33	1216.67	1116.67	1150	1333.33	1066.67	0
	18.45	700	1233.33	1183.33	1216.67	1133.33	1216.67	1216.67	1100	0
	18.46	700	1350	1216.67	1183.33	1250	1183.33	1233.33	1100	0
	18.47	700	1233.33	1233.33	1166.67	1366.67	1183.33	1366.67	1166.67	0
	18.48	600	1166.67	1266.67	1283.33	1416.67	1133.33	1450	1250	0
	18.49	616.667	1200	1283.33	1216.67	1400	1033.33	1383.33	1233.33	0
	18.5	733.333	1216.67	1366.67	1100	1383.33	1050	1233.33	1233.33	0
	18.51	716.667	1333.33	1416.67	1216.67	1283.33	1100	1233.33	1150	0
	18.52	616.667	1383.33	1483.33	1200	1216.67	1133.33	1383.33	1150	0
	18.53	550	1233.33	1366.67	1150	1200	1133.33	1416.67	1300	0
	18.54	633.333	1316.67	1250	1316.67	1183.33	1116.67	1333.33	1200	0
	18.55	750	1466.67	1300	1350	1150	1133.33	1233.33	1016.67	0
	18.56	616.667	1433.33	1300	1266.67	1166.67	1150	1200	1083.33	0
	18.57	550	1300	1283.33	1250	1150	1216.67	1233.33	1200	0
	18.58	533.333	1216.67	1366.67	1233.33	1166.67	1183.33	1433.33	1183.33	0
	18.59	600	1200	1400	1233.33	1116.67	1116.67	1416.67	1216.67	0
	18.6	650	1183.33	1350	1250	1100	1116.67	1300	1216.67	0
	18.61	633.333	1233.33	1300	1166.67	1233.33	1083.33	1350	1116.67	0
	18.62	616.667	1316.67	1266.67	1100	1233.33	1066.67	1466.67	1100	0
	18.63	666.667	1366.67	1316.67	1250	1216.67	1133.33	1466.67	1200	0
	18.64	716.667	1350	1450	1283.33	1350	1216.67	1450	1216.67	0
	18.65	716.667	1366.67	1483.33	1283.33	1316.67	1166.67	1466.67	1166.67	0
	18.66	700	1366.67	1433.33	1333.33	1133.33	1116.67	1400	1200	0
	18.67	683.333	1283.33	1350	1283.33	1150	1116.67	1316.67	1233.33	0
	18.68	666.667	1283.33	1333.33	1150	1366.67	1116.67	1416.67	1266.67	0
	18.69	650	1316.67	1300	1200	1416.67	1083.33	1566.67	1233.33	0
	18.7	616.667	1283.33	1250	1350	1383.33	1083.33	1450	1133.33	0
	18.71	566.667	1283.33	1283.33	1316.67	1266.67	1116.67	1250	1066.67	0
	18.72	616.667	1316.67	1316.67	1133.33	1366.67	1100	1283.33	1150	0
	18.73	650	1300	1266.67	1050	1316.67	983.333	1366.67	1166.67	0
	18.74	650	1233.33	1300	1266.67	1066.67	1016.67	1483.33	1083.33	0
	18.75	600	1283.33	1366.67	1383.33	1050	1033.33	1416.67	1100	0
	18.76	516.667	1366.67	1350	1383.33	1050	1066.67	1250	1116.67	0
	18.77	566.667	1316.67	1333.33	1350	1083.33	1116.67	1266.67	1166.67	0
	18.78	650	1266.67	1350	1183.33	1150	1150	1333.33	1266.67	0
	18.79	666.667	1216.67	1433.33	1116.67	1216.67	1183.33	1266.67	1283.33	0
	18.8	650	1133.33	1266.67	1166.67	1266.67	1150	1266.67	1216.67	0
	18.81	650	1133.33	1050	1183.33	1283.33	1083.33	1383.33	1200	0
	18.82	566.667	1233.33	1133.33	1250	1216.67	1100	1483.33	1150	0
	18.83	550	1300	1283.33	1383.33	1166.67	1200	1516.67	1150	0
	18.84	650	1183.33	1300	1383.33	1116.67	1300	1516.67	1250	0
	18.85	600	1100	1300	1266.67	1050	1183.33	1550	1333.33	0
	18.86	550	1250	1366.67	1200	1166.67	983.333	1466.67	1333.33	0
	18.87	516.667	1400	1516.67	1283.33	1216.67	1050	1333.33	1266.67	0
	18.88	516.667	1433.33	1383.33	1383.33	1200	1300	1350	1150	0
	18.89	566.667	1350	1216.67	1383.33	1300	1383.33	1383.33	1166.67	0
	18.9	600	1216.67	1216.67	1266.67	1250	1366.67	1383.33	1250	0
	18.91	600	1116.67	1233.33	1166.67	1216.67	1316.67	1416.67	1250	0
	18.92	633.333	1150	1250	1200	1283.33	1200	1316.67	1333.33	0
	18.93	650	1216.67	1233.33	1200	1333.33	1166.67	1266.67	1416.67	0
	18.94	700	1233.33	1250	1166.67	1350	1183.33	1266.67	1316.67	0
	18.95	716.667	1300	1250	1300	1366.67	1250	1300	1200	0
	18.96	666.667	1316.67	1300	1400	1400	1166.67	1483.33	1216.67	0
	18.97	700	1316.67	1200	1200	1416.67	1133.33	1500	1166.67	0
	18.98	650	1366.67	1050	1133.33	1350	1183.33	1416.67	1116.67	0
	18.99	600	1333.33	1200	1250	1250	1166.67	1350	1183.33	0
	19	650	1250	1383.33	1283.33	1233.33	1116.67	1350	1266.67	0
	19.01	566.667	1233.33	1316.67	1200	1233.33	1016.67	1516.67	1283.33	0
	19.02	433.333	1316.67	1250	1066.67	1166.67	1066.67	1633.33	1233.33	0
	19.03	450	1316.67	1300	1066.67	1166.67	1250	1550	1283.33	0
	19.04	600	1300	1316.67	1233.33	1283.33	1283.33	1450	1350	0
	19.05	750	1316.67	1283.33	1366.67	1266.67	1283.33	1366.67	1283.33	0
	19.06	733.333	1333.33	1283.33	1350	1250	1266.67	1383.33	1233.33	0
	19.07	633.333	1266.67	1333.33	1283.33	1400	1200	1416.67	1233.33	0
	19.08	650	1216.67	1300	1316.67	1450	1133.33	1500	1250	0
	19.09	750	1250	1350	1333.33	1333.33	1200	1533.33	1300	0
	19.1	716.667	1300	1533.33	1266.67	1366.67	1233.33	1383.33	1333.33	0
	19.11	683.333	1283.33	1500	1266.67	1366.67	1166.67	1200	1266.67	0
	19.12	683.333	1300	1450	1266.67	1316.67	1000	1216.67	1150	0
	19.13	650	1350	1383.33	1200	1350	950	1333.33	1183.33	0
	19.14	650	1400	1250	1183.33	1400	1100	1383.33	1283.33	0
	19.15	650	1400	1250	1233.33	1333.33	1200	1383.33	1333.33	0
	19.16	700	1333.33	1300	1350	1350	1200	1500	1316.67	0
	19.17	750	1300	1250	1316.67	1350	1183.33	1500	1300	0
	19.18	766.667	1233.33	1283.33	1200	1250	1300	1483.33	1283.33	0
	19.19	733.333	1216.67	1416.67	1183.33	1250	1266.67	1516.67	1200	0
	19.2	766.667	1266.67	1483.33	1216.67	1333.33	1200	1516.67	1166.67	0
	19.21	716.667	1333.33	1516.67	1250	1316.67	1200	1500	1250	0
	19.22	650	1366.67	1450	1250	1300	1183.33	1416.67	1316.67	0
	19.23	683.333	1283.33	1300	1316.67	1416.67	1250	1433.33	1283.33	0
	19.24	633.333	1233.33	1333.33	1333.33	1283.33	1183.33	1483.33	1250	0
	19.25	550	1233.33	1383.33	1183.33	1100	1083.33	1400	1250	0
	19.26	516.667	1300	1450	1133.33	1216.67	1150	1283.33	1266.67	0
	19.27	566.667	1466.67	1533.33	1183.33	1283.33	1300	1333.33	1200	0
	19.28	650	1483.33	1483.33	1333.33	1216.67	1316.67	1433.33	1233.33	0
	19.29	716.667	1383.33	1416.67	1450	1283.33	1250	1416.67	1233.33	0
	19.3	766.667	1383.33	1350	1400	1266.67	1200	1400	1150	0
	19.31	816.667	1483.33	1283.33	1316.67	1266.67	1150	1433.33	1216.67	0
	19.32	750	1500	1300	1366.67	1333.33	1066.67	1533.33	1400	0
	19.33	700	1416.67	1416.67	1466.67	1283.33	1050	1600	1366.67	0
	19.34	700	1316.67	1450	1400	1233.33	1050	1533.33	1200	0
	19.35	600	1316.67	1450	1266.67	1233.33	1066.67	1416.67	1150	0
	19.36	616.667	1416.67	1383.33	1233.33	1166.67	1116.67	1466.67	1233.33	0
	19.37	700	1533.33	1466.67	1266.67	1266.67	1133.33	1550	1316.67	0
	19.38	766.667	1566.67	1516.67	1266.67	1416.67	1166.67	1416.67	1316.67	0
	19.39	750	1400	1366.67	1316.67	1400	1150	1383.33	1200	0
	19.4	650	1366.67	1266.67	1383.33	1316.67	1066.67	1466.67	1150	0
	19.41	566.667	1416.67	1333.33	1333.33	1383.33	1116.67	1450	1233.33	0
	19.42	600	1433.33	1383.33	1333.33	1333.33	1116.67	1433.33	1333.33	0
	19.43	700	1366.67	1350	1366.67	1166.67	1116.67	1516.67	1366.67	0
	19.44	666.667	1300	1416.67	1266.67	1200	1233.33	1583.33	1316.67	0
	19.45	666.667	1300	1533.33	1200	1216.67	1250	1550	1316.67	0
	19.46	750	1250	1483.33	1300	1266.67	1166.67	1483.33	1250	0
	19.47	733.333	1266.67	1350	1333.33	1283.33	1150	1433.33	1183.33	0
	19.48	550	1416.67	1233.33	1350	1216.67	1150	1416.67	1300	0
	19.49	533.333	1450	1183.33	1400	1216.67	1216.67	1383.33	1366.67	0
	19.5	633.333	1266.67	1266.67	1350	1350	1133.33	1433.33	1316.67	0
	19.51	600	1266.67	1383.33	1300	1400	1000	1466.67	1266.67	0
	19.52	583.333	1366.67	1333.33	1250	1266.67	1116.67	1450	1250	0
	19.53	533.333	1333.33	1283.33	1283.33	1250	1166.67	1416.67	1300	0
	19.54	600	1333.33	1350	1416.67	1300	1133.33	1383.33	1400	0
	19.55	700	1466.67	1333.33	1466.67	1333.33	1233.33	1466.67	1383.33	0
	19.56	683.333	1516.67	1316.67	1366.67	1383.33	1233.33	1483.33	1300	0
	19.57	716.667	1433.33	1416.67	1283.33	1533.33	1233.33	1466.67	1250	0
	19.58	716.667	1450	1416.67	1266.67	1500	1266.67	1400	1216.67	0
	19.59	583.333	1400	1400	1300	1350	1216.67	1250	1316.67	0
	19.6	516.667	1400	1466.67	1300	1333.33	1166.67	1366.67	1400	0
	19.61	633.333	1550	1483.33	1383.33	1233.33	1233.33	1450	1283.33	0
	19.62	683.333	1600	1450	1416.67	1216.67	1200	1533.33	1366.67	0
	19.63	683.333	1516.67	1466.67	1233.33	1433.33	1100	1483.33	1416.67	0
	19.64	716.667	1300	1516.67	1216.67	1550	1233.33	1333.33	1283.33	0
	19.65	666.667	1216.67	1466.67	1316.67	1466.67	1300	1400	1283.33	0
	19.66	616.667	1283.33	1416.67	1266.67	1366.67	1200	1466.67	1350	0
	19.67	550	1183.33	1500	1300	1250	1133.33	1466.67	1366.67	0
	19.68	516.667	1033.33	1400	1383.33	1266.67	1166.67	1383.33	1366.67	0
	19.69	566.667	1150	1283.33	1366.67	1333.33	1183.33	1266.67	1366.67	0
	19.7	633.333	1316.67	1366.67	1366.67	1300	1166.67	1233.33	1366.67	0
	19.71	666.667	1300	1450	1366.67	1266.67	1216.67	1416.67	1383.33	0
	19.72	700	1400	1383.33	1233.33	1266.67	1300	1650	1366.67	0
	19.73	683.333	1500	1316.67	1300	1300	1216.67	1633.33	1316.67	0
	19.74	600	1383.33	1383.33	1483.33	1266.67	1183.33	1466.67	1300	0
	19.75	600	1300	1433.33	1400	1316.67	1166.67	1400	1366.67	0
	19.76	633.333	1333.33	1333.33	1250	1383.33	1000	1383.33	1383.33	0
	19.77	616.667	1350	1300	1283.33	1466.67	933.333	1416.67	1166.67	0
	19.78	616.667	1366.67	1350	1316.67	1600	1050	1483.33	1083.33	0
	19.79	583.333	1433.33	1316.67	1300	1533.33	1233.33	1516.67	1300	0
	19.8	566.667	1400	1416.67	1283.33	1316.67	1116.67	1516.67	1383.33	0
	19.81	633.333	1416.67	1450	1333.33	1316.67	1033.33	1466.67	1333.33	0
	19.82	583.333	1516.67	1383.33	1433.33	1466.67	1150	1383.33	1300	0
	19.83	533.333	1566.67	1400	1300	1450	1083.33	1400	1366.67	0
	19.84	600	1600	1350	1333.33	1300	1116.67	1350	1450	0
	19.85	600	1533.33	1466.67	1400	1266.67	1200	1566.67	1416.67	0
	19.86	550	1400	1633.33	1366.67	1316.67	1216.67	1783.33	1416.67	0
	19.87	583.333	1366.67	1666.67	1400	1316.67	1216.67	1683.33	1483.33	0
	19.88	550	1550	1416.67	1316.67	1266.67	1183.33	1500	1400	0
	19.89	566.667	1600	1233.33	1350	1200	1150	1383.33	1300	0
	19.9	700	1416.67	1283.33	1433.33	1316.67	1083.33	1383.33	1300	0
	19.91	666.667	1300	1533.33	1350	1500	1033.33	1533.33	1250	0
	19.92	550	1283.33	1616.67	1300	1650	1216.67	1600	1233.33	0
	19.93	600	1400	1550	1316.67	1683.33	1350	1450	1300	0
	19.94	683.333	1483.33	1533.33	1333.33	1550	1300	1450	1333.33	0
	19.95	683.333	1400	1500	1316.67	1466.67	1333.33	1550	1283.33	0
	19.96	733.333	1366.67	1350	1266.67	1466.67	1233.33	1650	1350	0
	19.97	733.333	1466.67	1283.33	1300	1416.67	1100	1683.33	1383.33	0
	19.98	700	1400	1316.67	1383.33	1416.67	1200	1566.67	1316.67	0
	19.99	716.667	1216.67	1400	1350	1400	1166.67	1433.33	1283.33	0
	20	683.333	1250	1483.33	1233.33	1466.67	1000	1316.67	1300	0
	20.01	733.333	1366.67	1483.33	1250	1400	1100	1250	1400	0
	20.02	750	1416.67	1466.67	1350	1350	1316.67	1333.33	1450	0
	20.03	633.333	1466.67	1566.67	1350	1500	1316.67	1433.33	1433.33	0
	20.04	550	1516.67	1516.67	1466.67	1333.33	1283.33	1533.33	1433.33	0
	20.05	550	1450	1333.33	1533.33	1233.33	1266.67	1583.33	1483.33	0
	20.06	616.667	1416.67	1350	1416.67	1316.67	1183.33	1516.67	1416.67	0
	20.07	683.333	1433.33	1416.67	1550	1266.67	1216.67	1483.33	1316.67	0
	20.08	666.667	1350	1516.67	1566.67	1333.33	1316.67	1416.67	1216.67	0
	20.09	633.333	1383.33	1616.67	1466.67	1433.33	1450	1433.33	1150	0
	20.1	550	1450	1750	1533.33	1366.67	1483.33	1466.67	1183.33	0
	20.11	533.333	1350	1733.33	1516.67	1366.67	1383.33	1433.33	1300	0
	20.12	550	1283.33	1500	1350	1450	1383.33	1533.33	1316.67	0
	20.13	583.333	1350	1433.33	1400	1450	1350	1683.33	1250	0
	20.14	666.667	1450	1383.33	1483.33	1333.33	1266.67	1633.33	1350	0
	20.15	716.667	1500	1383.33	1483.33	1333.33	1183.33	1466.67	1516.67	0
	20.16	683.333	1416.67	1416.67	1433.33	1333.33	1166.67	1466.67	1533.33	0
	20.17	600	1366.67	1416.67	1383.33	1416.67	1233.33	1466.67	1400	0
	20.18	650	1483.33	1483.33	1400	1516.67	1216.67	1466.67	1333.33	0
	20.19	800	1500	1450	1300	1333.33	1233.33	1550	1316.67	0
	20.2	800	1450	1450	1200	1300	1333.33	1500	1416.67	0
	20.21	833.333	1400	1516.67	1200	1316.67	1266.67	1533.33	1450	0
	20.22	833.333	1333.33	1433.33	1316.67	1250	1200	1566.67	1283.33	0
	20.23	733.333	1416.67	1450	1450	1283.33	1166.67	1533.33	1283.33	0
	20.24	733.333	1466.67	1533.33	1250	1333.33	1183.33	1700	1483.33	0
	20.25	700	1366.67	1516.67	1150	1500	1383.33	1700	1550	0
	20.26	716.667	1400	1450	1316.67	1516.67	1416.67	1550	1466.67	0
	20.27	766.667	1450	1483.33	1400	1416.67	1300	1400	1366.67	0
	20.28	750	1416.67	1583.33	1333.33	1466.67	1333.33	1316.67	1316.67	0
	20.29	683.333	1416.67	1566.67	1383.33	1416.67	1316.67	1500	1383.33	0
	20.3	566.667	1466.67	1633.33	1483.33	1416.67	1300	1600	1500	0
	20.31	550	1500	1600	1466.67	1483.33	1333.33	1566.67	1450	0
	20.32	650	1516.67	1416.67	1366.67	1450	1266.67	1516.67	1383.33	0
	20.33	700	1583.33	1350	1400	1450	1183.33	1466.67	1366.67	0
	20.34	733.333	1633.33	1433.33	1416.67	1433.33	1200	1433.33	1400	0
	20.35	700	1633.33	1566.67	1383.33	1516.67	1233.33	1550	1400	0
	20.36	583.333	1533.33	1633.33	1400	1516.67	1200	1633.33	1416.67	0
	20.37	550	1400	1533.33	1483.33	1466.67	1300	1600	1400	0
	20.38	683.333	1433.33	1450	1483.33	1533.33	1383.33	1600	1366.67	0
	20.39	766.667	1666.67	1500	1516.67	1400	1366.67	1666.67	1333.33	0
	20.4	783.333	1766.67	1466.67	1683.33	1416.67	1333.33	1600	1300	0
	20.41	800	1633.33	1450	1566.67	1600	1200	1433.33	1300	0
	20.42	783.333	1616.67	1566.67	1400	1616.67	1183.33	1400	1400	0
	20.43	683.333	1533.33	1650	1450	1450	1216.67	1383.33	1400	0
	20.44	600	1466.67	1633.33	1516.67	1383.33	1233.33	1416.67	1300	0
	20.45	600	1600	1666.67	1516.67	1483.33	1250	1650	1383.33	0
	20.46	666.667	1516.67	1516.67	1483.33	1450	1233.33	1766.67	1483.33	0
	20.47	666.667	1433.33	1383.33	1500	1550	1250	1700	1500	0
	20.48	750	1550	1466.67	1383.33	1650	1216.67	1683.33	1450	0
	20.49	833.333	1600	1533.33	1300	1650	1383.33	1733.33	1433.33	0
	20.5	733.333	1533.33	1600	1300	1533.33	1383.33	1616.67	1416.67	0
	20.51	733.333	1400	1566.67	1350	1416.67	1266.67	1500	1433.33	0
	20.52	750	1350	1516.67	1383.33	1433.33	1416.67	1533.33	1416.67	0
	20.53	750	1366.67	1566.67	1416.67	1333.33	1400	1650	1433.33	0
	20.54	733.333	1466.67	1583.33	1516.67	1283.33	1250	1633.33	1450	0
	20.55	633.333	1550	1600	1483.33	1300	1216.67	1433.33	1400	0
	20.56	650	1583.33	1583.33	1433.33	1333.33	1266.67	1466.67	1266.67	0
	20.57	700	1583.33	1583.33	1466.67	1500	1316.67	1666.67	1366.67	0
	20.58	683.333	1483.33	1583.33	1466.67	1600	1233.33	1750	1566.67	0
	20.59	683.333	1483.33	1516.67	1466.67	1500	1300	1683.33	1500	0
	20.6	683.333	1583.33	1450	1500	1483.33	1316.67	1583.33	1450	0
	20.61	700	1583.33	1383.33	1366.67	1400	1283.33	1566.67	1333.33	0
	20.62	733.333	1483.33	1450	1383.33	1366.67	1350	1500	1333.33	0
	20.63	700	1416.67	1516.67	1600	1466.67	1350	1466.67	1583.33	0
	20.64	650	1533.33	1550	1516.67	1550	1300	1566.67	1650	0
	20.65	666.667	1666.67	1533.33	1350	1466.67	1233.33	1633.33	1550	0
	20.66	666.667	1600	1466.67	1333.33	1416.67	1216.67	1466.67	1450	0
	20.67	583.333	1600	1433.33	1316.67	1566.67	1283.33	1350	1450	0
	20.68	650	1750	1516.67	1300	1533.33	1316.67	1500	1450	0
	20.69	666.667	1833.33	1600	1300	1383.33	1400	1583.33	1450	0
	20.7	616.667	1666.67	1616.67	1350	1400	1433.33	1583.33	1466.67	0
	20.71	566.667	1516.67	1650	1383.33	1533.33	1466.67	1500	1383.33	0
	20.72	566.667	1550	1600	1333.33	1600	1616.67	1516.67	1333.33	0
	20.73	550	1616.67	1550	1416.67	1466.67	1550	1650	1350	0
	20.74	600	1550	1516.67	1566.67	1416.67	1533.33	1700	1483.33	0
	20.75	583.333	1450	1533.33	1566.67	1416.67	1566.67	1600	1583.33	0
	20.76	583.333	1450	1533.33	1633.33	1450	1416.67	1483.33	1566.67	0
	20.77	683.333	1533.33	1516.67	1583.33	1500	1233.33	1616.67	1500	0
	20.78	683.333	1566.67	1583.33	1550	1583.33	1200	1733.33	1433.33	0
	20.79	616.667	1516.67	1583.33	1433.33	1600	1283.33	1566.67	1416.67	0
	20.8	633.333	1533.33	1550	1366.67	1600	1350	1516.67	1416.67	0
	20.81	650	1466.67	1616.67	1400	1666.67	1333.33	1600	1366.67	0
	20.82	650	1400	1583.33	1366.67	1666.67	1400	1550	1350	0
	20.83	666.667	1483.33	1566.67	1350	1466.67	1450	1550	1366.67	0
	20.84	683.333	1466.67	1550	1433.33	1450	1350	1516.67	1383.33	0
	20.85	683.333	1500	1383.33	1450	1550	1400	1483.33	1383.33	0
	20.86	616.667	1600	1416.67	1416.67	1450	1266.67	1466.67	1400	0
	20.87	650	1583.33	1600	1533.33	1366.67	1116.67	1533.33	1366.67	0
	20.88	633.333	1483.33	1466.67	1500	1450	1316.67	1516.67	1366.67	0
	20.89	583.333	1633.33	1500	1366.67	1516.67	1500	1516.67	1383.33	0
	20.9	583.333	1616.67	1600	1383.33	1466.67	1466.67	1566.67	1450	0
	20.91	583.333	1466.67	1500	1383.33	1400	1433.33	1633.33	1483.33	0
	20.92	616.667	1550	1466.67	1450	1533.33	1466.67	1650	1483.33	0
	20.93	683.333	1600	1450	1416.67	1583.33	1450	1550	1466.67	0
	20.94	650	1416.67	1400	1433.33	1500	1466.67	1533.33	1500	0
	20.95	650	1466.67	1400	1616.67	1483.33	1300	1483.33	1500	0
	20.96	650	1550	1483.33	1666.67	1516.67	1266.67	1500	1500	0
	20.97	633.333	1500	1516.67	1600	1583.33	1300	1633.33	1366.67	0
	20.98	566.667	1516.67	1466.67	1483.33	1683.33	1266.67	1700	1383.33	0
	20.99	516.667	1433.33	1483.33	1416.67	1700	1316.67	1700	1566.67	0
	21	550	1400	1616.67	1400	1483.33	1383.33	1716.67	1633.33	0
	21.01	616.667	1500	1566.67	1416.67	1350	1366.67	1683.33	1566.67	0
	21.02	666.667	1633.33	1466.67	1366.67	1616.67	1366.67	1783.33	1500	0
	21.03	683.333	1766.67	1366.67	1366.67	1766.67	1383.33	1883.33	1516.67	0
	21.04	700	1633.33	1550	1483.33	1600	1533.33	1666.67	1533.33	0
	21.05	666.667	1533.33	1550	1500	1633.33	1516.67	1516.67	1450	0
	21.06	683.333	1600	1383.33	1450	1583.33	1366.67	1616.67	1450	0
	21.07	700	1516.67	1433.33	1516.67	1566.67	1366.67	1683.33	1550	0
	21.08	666.667	1500	1600	1433.33	1566.67	1483.33	1633.33	1516.67	0
	21.09	666.667	1633.33	1633.33	1383.33	1466.67	1483.33	1633.33	1550	0
	21.1	800	1716.67	1700	1483.33	1483.33	1350	1583.33	1516.67	0
	21.11	833.333	1783.33	1666.67	1600	1600	1283.33	1633.33	1483.33	0
	21.12	766.667	1866.67	1716.67	1566.67	1516.67	1383.33	1733.33	1450	0
	21.13	733.333	1716.67	1733.33	1500	1516.67	1333.33	1716.67	1466.67	0
	21.14	700	1616.67	1616.67	1633.33	1600	1350	1650	1450	0
	21.15	633.333	1583.33	1550	1733.33	1616.67	1316.67	1633.33	1383.33	0
	21.16	633.333	1650	1600	1650	1516.67	1283.33	1833.33	1366.67	0
	21.17	600	1733.33	1533.33	1483.33	1433.33	1350	1883.33	1383.33	0
	21.18	583.333	1666.67	1433.33	1400	1416.67	1266.67	1650	1550	0
	21.19	600	1616.67	1450	1483.33	1500	1216.67	1583.33	1583.33	0
	21.2	650	1750	1483.33	1600	1483.33	1233.33	1666.67	1450	0
	21.21	683.333	1816.67	1566.67	1550	1466.67	1250	1733.33	1450	0
	21.22	733.333	1833.33	1583.33	1566.67	1500	1250	1783.33	1466.67	0
	21.23	733.333	1900	1550	1583.33	1500	1300	1916.67	1533.33	0
	21.24	716.667	1750	1533.33	1566.67	1550	1366.67	1933.33	1633.33	0
	21.25	766.667	1700	1516.67	1616.67	1583.33	1350	1733.33	1566.67	0
	21.26	683.333	1700	1550	1600	1516.67	1300	1616.67	1500	0
	21.27	716.667	1466.67	1516.67	1533.33	1533.33	1150	1683.33	1450	0
	21.28	683.333	1400	1516.67	1533.33	1416.67	1300	1683.33	1283.33	0
	21.29	633.333	1516.67	1750	1483.33	1616.67	1416.67	1666.67	1283.33	0
	21.3	600	1583.33	1783.33	1500	1700	1466.67	1683.33	1483.33	0
	21.31	633.333	1433.33	1683.33	1516.67	1466.67	1516.67	1733.33	1550	0
	21.32	666.667	1466.67	1633.33	1483.33	1400	1400	1766.67	1466.67	0
	21.33	633.333	1533.33	1600	1500	1450	1316.67	1716.67	1366.67	0
	21.34	633.333	1533.33	1616.67	1466.67	1483.33	1300	1666.67	1316.67	0
	21.35	583.333	1483.33	1750	1333.33	1483.33	1200	1666.67	1383.33	0
	21.36	500	1600	1650	1333.33	1533.33	1233.33	1716.67	1333.33	0
	21.37	533.333	1566.67	1566.67	1483.33	1650	1300	1733.33	1350	0
	21.38	583.333	1400	1500	1600	1750	1433.33	1600	1383.33	0
	21.39	516.667	1466.67	1500	1550	1666.67	1550	1533.33	1366.67	0
	21.4	483.333	1683.33	1616.67	1466.67	1500	1450	1616.67	1416.67	0
	21.41	566.667	1683.33	1650	1483.33	1500	1333.33	1766.67	1433.33	0
	21.42	650	1700	1666.67	1366.67	1533.33	1233.33	1733.33	1500	0
	21.43	650	1783.33	1650	1266.67	1400	1216.67	1633.33	1583.33	0
	21.44	666.667	1666.67	1666.67	1466.67	1466.67	1416.67	1650	1550	0
	21.45	666.667	1500	1600	1666.67	1633.33	1516.67	1750	1416.67	0
	21.46	716.667	1433.33	1633.33	1666.67	1600	1450	1816.67	1383.33	0
	21.47	716.667	1550	1533.33	1566.67	1466.67	1433.33	1800	1350	0
	21.48	750	1550	1666.67	1483.33	1533.33	1366.67	1700	1483.33	0
	21.49	750	1533.33	1883.33	1483.33	1566.67	1316.67	1633.33	1583.33	0
	21.5	683.333	1550	1783.33	1466.67	1433.33	1383.33	1583.33	1483.33	0
	21.51	800	1483.33	1650	1433.33	1516.67	1483.33	1550	1466.67	0
	21.52	833.333	1566.67	1566.67	1433.33	1483.33	1366.67	1683.33	1600	0
	21.53	700	1683.33	1700	1366.67	1466.67	1416.67	1733.33	1566.67	0
	21.54	633.333	1616.67	1800	1350	1633.33	1466.67	1683.33	1516.67	0
	21.55	716.667	1533.33	1783.33	1333.33	1683.33	1433.33	1516.67	1500	0
	21.56	750	1650	1683.33	1466.67	1600	1450	1600	1566.67	0
	21.57	683.333	1516.67	1833.33	1583.33	1550	1483.33	1616.67	1600	0
	21.58	633.333	1500	1866.67	1600	1533.33	1433.33	1616.67	1566.67	0
	21.59	583.333	1616.67	1666.67	1650	1533.33	1483.33	1633.33	1550	0
	21.6	583.333	1716.67	1516.67	1633.33	1533.33	1483.33	1666.67	1566.67	0
	21.61	666.667	1716.67	1583.33	1516.67	1533.33	1433.33	1633.33	1516.67	0
	21.62	750	1633.33	1666.67	1416.67	1533.33	1433.33	1733.33	1433.33	0
	21.63	683.333	1516.67	1683.33	1416.67	1516.67	1333.33	1966.67	1416.67	0
	21.64	583.333	1483.33	1750	1450	1466.67	1416.67	2016.67	1383.33	0
	21.65	500	1483.33	1750	1500	1400	1583.33	1950	1400	0
	21.66	566.667	1516.67	1633.33	1566.67	1366.67	1533.33	1833.33	1450	0
	21.67	666.667	1566.67	1666.67	1650	1400	1383.33	1700	1483.33	0
	21.68	666.667	1616.67	1616.67	1616.67	1583.33	1433.33	1550	1400	0
	21.69	666.667	1666.67	1550	1550	1600	1433.33	1416.67	1583.33	0
	21.7	633.333	1666.67	1516.67	1466.67	1450	1366.67	1483.33	1483.33	0
	21.71	666.667	1583.33	1783.33	1566.67	1533.33	1366.67	1633.33	1500	0
	21.72	683.333	1450	1750	1633.33	1566.67	1483.33	1700	1650	0
	21.73	683.333	1433.33	1716.67	1483.33	1616.67	1533.33	1883.33	1500	0
	21.74	633.333	1600	1633.33	1550	1700	1466.67	1833.33	1600	0
	21.75	600	1550	1766.67	1616.67	1616.67	1400	1733.33	1716.67	0
	21.76	666.667	1516.67	1766.67	1516.67	1533.33	1366.67	1633.33	1700	0
	21.77	666.667	1616.67	1716.67	1433.33	1666.67	1266.67	1750	1700	0
	21.78	666.667	1616.67	1650	1316.67	1616.67	1316.67	1816.67	1616.67	0
	21.79	650	1550	1566.67	1400	1550	1316.67	1883.33	1550	0
	21.8	583.333	1583.33	1683.33	1533.33	1633.33	1266.67	1900	1550	0
	21.81	566.667	1633.33	1733.33	1500	1566.67	1283.33	1733.33	1550	0
	21.82	583.333	1550	1750	1466.67	1600	1400	1650	1400	0
	21.83	616.667	1433.33	1750	1483.33	1700	1483.33	1666.67	1366.67	0
	21.84	666.667	1500	1783.33	1533.33	1650	1416.67	1683.33	1466.67	0
	21.85	700	1633.33	1850	1550	1500	1300	1500	1550	0
	21.86	700	1666.67	1833.33	1566.67	1483.33	1266.67	1483.33	1533.33	0
	21.87	716.667	1633.33	1750	1633.33	1533.33	1316.67	1633.33	1433.33	0
	21.88	683.333	1583.33	1850	1683.33	1533.33	1366.67	1716.67	1416.67	0
	21.89	650	1650	1883.33	1583.33	1533.33	1400	1766.67	1583.33	0
	21.9	583.333	1633.33	1666.67	1600	1550	1466.67	1750	1616.67	0
	21.91	650	1700	1583.33	1683.33	1533.33	1350	1700	1533.33	0
	21.92	633.333	1666.67	1600	1583.33	1466.67	1533.33	1616.67	1433.33	0
	21.93	566.667	1500	1566.67	1500	1450	1633.33	1716.67	1450	0
	21.94	700	1483.33	1566.67	1433.33	1650	1583.33	1700	1533.33	0
	21.95	733.333	1550	1566.67	1450	1716.67	1616.67	1683.33	1466.67	0
	21.96	583.333	1633.33	1733.33	1483.33	1683.33	1383.33	1566.67	1533.33	0
	21.97	583.333	1566.67	1783.33	1433.33	1733.33	1366.67	1666.67	1616.67	0
	21.98	600	1683.33	1716.67	1483.33	1716.67	1433.33	1633.33	1583.33	0
	21.99	600	1650	1733.33	1533.33	1583.33	1516.67	1516.67	1550	0
	22	650	1533.33	1716.67	1700	1466.67	1500	1533.33	1566.67	0
	22.01	616.667	1500	1800	1666.67	1500	1450	1583.33	1666.67	0
	22.02	666.667	1766.67	1883.33	1666.67	1550	1433.33	1650	1700	0
	22.03	666.667	1816.67	1900	1766.67	1583.33	1383.33	1666.67	1533.33	0
	22.04	666.667	1866.67	1800	1666.67	1633.33	1416.67	1716.67	1450	0
	22.05	650	1816.67	1683.33	1600	1716.67	1416.67	1766.67	1500	0
	22.06	666.667	1616.67	1633.33	1683.33	1666.67	1400	1633.33	1466.67	0
	22.07	600	1566.67	1550	1700	1400	1450	1516.67	1400	0
	22.08	616.667	1600	1450	1666.67	1300	1450	1566.67	1466.67	0
	22.09	683.333	1700	1633.33	1650	1500	1483.33	1633.33	1516.67	0
	22.1	733.333	1716.67	1616.67	1466.67	1733.33	1433.33	1716.67	1433.33	0
	22.11	716.667	1700	1566.67	1433.33	1600	1400	1650	1400	0
	22.12	666.667	1683.33	1716.67	1466.67	1666.67	1466.67	1683.33	1416.67	0
	22.13	600	1700	1666.67	1416.67	1766.67	1500	1816.67	1566.67	0
	22.14	633.333	1700	1583.33	1483.33	1600	1416.67	1683.33	1533.33	0
	22.15	700	1783.33	1600	1416.67	1450	1366.67	1600	1616.67	0
	22.16	666.667	1733.33	1616.67	1400	1550	1383.33	1533.33	1516.67	0
	22.17	766.667	1650	1633.33	1466.67	1700	1416.67	1583.33	1433.33	0
	22.18	733.333	1633.33	1666.67	1433.33	1450	1383.33	1550	1533.33	0
	22.19	616.667	1666.67	1783.33	1416.67	1400	1383.33	1500	1533.33	0
	22.2	616.667	1633.33	1716.67	1383.33	1450	1450	1683.33	1666.67	0
	22.21	616.667	1450	1700	1466.67	1616.67	1383.33	1883.33	1650	0
	22.22	666.667	1466.67	1750	1550	1633.33	1400	1850	1533.33	0
	22.23	600	1550	1583.33	1566.67	1550	1433.33	1800	1500	0
	22.24	583.333	1700	1450	1583.33	1550	1383.33	1683.33	1600	0
	22.25	633.333	1716.67	1550	1616.67	1683.33	1466.67	1583.33	1550	0
	22.26	683.333	1700	1683.33	1666.67	1683.33	1483.33	1483.33	1516.67	0
	22.27	633.333	1700	1716.67	1600	1500	1433.33	1633.33	1433.33	0
	22.28	633.333	1650	1750	1550	1466.67	1350	1766.67	1433.33	0
	22.29	583.333	1516.67	1766.67	1750	1550	1400	1750	1516.67	0
	22.3	583.333	1500	1783.33	1850	1600	1416.67	1616.67	1600	0
	22.31	650	1616.67	1733.33	1733.33	1566.67	1383.33	1583.33	1600	0
	22.32	650	1683.33	1633.33	1650	1516.67	1233.33	1766.67	1483.33	0
	22.33	666.667	1750	1750	1600	1550	1233.33	1950	1483.33	0
	22.34	650	1716.67	1700	1616.67	1683.33	1450	1900	1400	0
	22.35	616.667	1633.33	1633.33	1533.33	1716.67	1550	1683.33	1383.33	0
	22.36	700	1566.67	1733.33	1433.33	1666.67	1500	1650	1400	0
	22.37	733.333	1650	1800	1500	1733.33	1450	1533.33	1516.67	0
	22.38	750	1800	1500	1633.33	1583.33	1350	1533.33	1600	0
	22.39	716.667	1666.67	1483.33	1666.67	1600	1416.67	1616.67	1533.33	0
	22.4	666.667	1550	1600	1616.67	1433.33	1366.67	1616.67	1516.67	0
	22.41	616.667	1600	1733.33	1633.33	1433.33	1400	1600	1666.67	0
	22.42	666.667	1733.33	1750	1650	1533.33	1316.67	1783.33	1683.33	0
	22.43	666.667	1883.33	1650	1500	1800	1266.67	1766.67	1650	0
	22.44	650	1816.67	1683.33	1500	1883.33	1450	1750	1600	0
	22.45	650	1483.33	1733.33	1500	1733.33	1500	1733.33	1550	0
	22.46	600	1533.33	1633.33	1466.67	1666.67	1383.33	1633.33	1400	0
	22.47	650	1733.33	1550	1550	1766.67	1233.33	1583.33	1383.33	0
	22.48	783.333	1833.33	1683.33	1566.67	1783.33	1200	1633.33	1550	0
	22.49	733.333	1816.67	1716.67	1416.67	1633.33	1333.33	1650	1550	0
	22.5	716.667	1683.33	1666.67	1433.33	1566.67	1383.33	1616.67	1550	0
	22.51	716.667	1650	1766.67	1666.67	1683.33	1400	1616.67	1716.67	0
	22.52	716.667	1650	1700	1633.33	1666.67	1500	1750	1733.33	0
	22.53	733.333	1700	1583.33	1483.33	1700	1416.67	1633.33	1683.33	0
	22.54	700	1683.33	1466.67	1466.67	1666.67	1366.67	1516.67	1683.33	0
	22.55	650	1533.33	1566.67	1466.67	1683.33	1433.33	1716.67	1683.33	0
	22.56	600	1550	1733.33	1550	1583.33	1483.33	1983.33	1616.67	0
	22.57	650	1550	1666.67	1633.33	1433.33	1500	1766.67	1450	0
	22.58	733.333	1566.67	1583.33	1650	1383.33	1566.67	1650	1550	0
	22.59	700	1666.67	1533.33	1433.33	1533.33	1383.33	1633.33	1683.33	0
	22.6	666.667	1600	1700	1466.67	1566.67	1416.67	1783.33	1533.33	0
	22.61	716.667	1466.67	1650	1500	1616.67	1450	1816.67	1500	0
	22.62	666.667	1616.67	1533.33	1550	1516.67	1200	1716.67	1516.67	0
	22.63	633.333	1650	1583.33	1783.33	1500	1200	1700	1566.67	0
	22.64	583.333	1766.67	1566.67	1750	1633.33	1483.33	1716.67	1616.67	0
	22.65	566.667	1633.33	1816.67	1516.67	1650	1550	1766.67	1516.67	0
	22.66	650	1550	1816.67	1550	1566.67	1400	1850	1566.67	0
	22.67	650	1633.33	1616.67	1583.33	1683.33	1233.33	1800	1516.67	0
	22.68	633.333	1616.67	1566.67	1650	1650	1316.67	1683.33	1566.67	0
	22.69	583.333	1566.67	1733.33	1533.33	1583.33	1450	1700	1683.33	0
	22.7	516.667	1650	1616.67	1483.33	1550	1600	1733.33	1700	0
	22.71	550	1633.33	1466.67	1650	1650	1500	1733.33	1600	0
	22.72	600	1666.67	1600	1600	1583.33	1383.33	1733.33	1416.67	0
	22.73	666.667	1716.67	1683.33	1450	1516.67	1283.33	1733.33	1466.67	0
	22.74	650	1600	1550	1500	1350	1216.67	1633.33	1500	0
	22.75	633.333	1550	1600	1466.67	1483.33	1333.33	1766.67	1466.67	0
	22.76	533.333	1616.67	1783.33	1533.33	1600	1450	1900	1450	0
	22.77	550	1750	1816.67	1483.33	1550	1433.33	1733.33	1616.67	0
	22.78	600	1733.33	1816.67	1500	1616.67	1483.33	1750	1616.67	0
	22.79	716.667	1600	1733.33	1466.67	1516.67	1350	1800	1450	0
	22.8	716.667	1683.33	1666.67	1666.67	1450	1216.67	1766.67	1566.67	0
	22.81	716.667	1716.67	1700	1666.67	1600	1316.67	1716.67	1666.67	0
	22.82	683.333	1766.67	1600	1666.67	1666.67	1450	1700	1683.33	0
	22.83	683.333	1800	1483.33	1616.67	1566.67	1566.67	1666.67	1766.67	0
	22.84	716.667	1533.33	1483.33	1633.33	1600	1416.67	1633.33	1733.33	0
	22.85	733.333	1483.33	1516.67	1500	1733.33	1383.33	1666.67	1600	0
	22.86	616.667	1600	1600	1483.33	1650	1366.67	1750	1433.33	0
	22.87	600	1700	1600	1583.33	1550	1266.67	1750	1550	0
	22.88	650	1600	1666.67	1566.67	1566.67	1266.67	1983.33	1566.67	0
	22.89	733.333	1650	1766.67	1666.67	1666.67	1283.33	1916.67	1550	0
	22.9	633.333	1700	1683.33	1666.67	1633.33	1250	1650	1533.33	0
	22.91	583.333	1583.33	1616.67	1433.33	1716.67	1366.67	1633.33	1683.33	0
	22.92	700	1433.33	1616.67	1366.67	1716.67	1433.33	1700	1716.67	0
	22.93	766.667	1516.67	1616.67	1566.67	1683.33	1216.67	1700	1650	0
	22.94	600	1783.33	1700	1533.33	1716.67	1216.67	1816.67	1600	0
	22.95	583.333	1750	1716.67	1566.67	1616.67	1350	1750	1433.33	0
	22.96	616.667	1650	1783.33	1600	1550	1550	1583.33	1416.67	0
	22.97	733.333	1733.33	1700	1683.33	1533.33	1533.33	1650	1466.67	0
	22.98	750	1633.33	1766.67	1700	1633.33	1300	1733.33	1583.33	0
	22.99	633.333	1633.33	1900	1616.67	1500	1250	1750	1583.33	0
	23	633.333	1766.67	1733.33	1433.33	1566.67	1316.67	1783.33	1450	0
	23.01	650	1733.33	1616.67	1400	1566.67	1383.33	1816.67	1350	0
	23.02	683.333	1566.67	1733.33	1400	1616.67	1450	1733.33	1216.67	0
	23.03	750	1716.67	1600	1400	1666.67	1300	1716.67	1466.67	0
	23.04	666.667	1716.67	1433.33	1483.33	1416.67	1333.33	1750	1633.33	0
	23.05	583.333	1700	1633.33	1466.67	1466.67	1400	1633.33	1566.67	0
	23.06	666.667	1650	1800	1566.67	1633.33	1433.33	1550	1500	0
	23.07	683.333	1616.67	1700	1500	1700	1333.33	1533.33	1550	0
	23.08	750	1666.67	1550	1550	1616.67	1316.67	1566.67	1400	0
	23.09	850	1683.33	1683.33	1633.33	1616.67	1450	1600	1300	0
	23.1	833.333	1466.67	1700	1583.33	1583.33	1516.67	1716.67	1433.33	0
	23.11	850	1450	1616.67	1533.33	1533.33	1316.67	1783.33	1633.33	0
	23.12	750	1550	1500	1633.33	1616.67	1316.67	1716.67	1683.33	0
	23.13	650	1616.67	1600	1583.33	1650	1500	1750	1616.67	0
	23.14	583.333	1466.67	1800	1650	1716.67	1583.33	1883.33	1466.67	0
	23.15	650	1550	1716.67	1700	1700	1383.33	1883.33	1366.67	0
	23.16	700	1783.33	1566.67	1533.33	1650	1416.67	1700	1650	0
	23.17	633.333	1933.33	1633.33	1700	1566.67	1333.33	1666.67	1666.67	0
	23.18	583.333	1966.67	1916.67	1783.33	1616.67	1466.67	1650	1416.67	0
	23.19	600	1750	1766.67	1700	1800	1583.33	1683.33	1433.33	0
	23.2	600	1616.67	1800	1583.33	1666.67	1700	1750	1600	0
	23.21	616.667	1666.67	1766.67	1500	1716.67	1600	1766.67	1566.67	0
	23.22	616.667	1766.67	1666.67	1483.33	1616.67	1483.33	1766.67	1533.33	0
	23.23	700	1916.67	1750	1433.33	1383.33	1416.67	1883.33	1583.33	0
	23.24	600	1900	1616.67	1616.67	1366.67	1383.33	1916.67	1766.67	0
	23.25	683.333	1816.67	1666.67	1666.67	1550	1316.67	1816.67	1716.67	0
	23.26	683.333	1666.67	1633.33	1466.67	1600	1200	1833.33	1683.33	0
	23.27	616.667	1666.67	1716.67	1383.33	1600	1233.33	1583.33	1600	0
	23.28	700	1666.67	1783.33	1466.67	1516.67	1233.33	1733.33	1550	0
	23.29	700	1616.67	1750	1583.33	1500	1116.67	1700	1516.67	0
	23.3	583.333	1683.33	1666.67	1433.33	1483.33	1133.33	1766.67	1566.67	0
	23.31	516.667	1633.33	1583.33	1450	1583.33	1266.67	1716.67	1433.33	0
	23.32	500	1600	1600	1600	1516.67	1366.67	1683.33	1550	0
	23.33	500	1716.67	1683.33	1433.33	1583.33	1216.67	1883.33	1533.33	0
	23.34	616.667	1600	1650	1316.67	1666.67	1266.67	1950	1466.67	0
	23.35	633.333	1500	1616.67	1500	1666.67	1366.67	1783.33	1383.33	0
	23.36	616.667	1633.33	1533.33	1516.67	1700	1500	1783.33	1433.33	0
	23.37	683.333	1850	1533.33	1500	1433.33	1450	1883.33	1483.33	0
	23.38	800	1666.67	1516.67	1466.67	1433.33	1266.67	1833.33	1550	0
	23.39	766.667	1583.33	1616.67	1400	1733.33	1333.33	1816.67	1416.67	0
	23.4	616.667	1633.33	1716.67	1250	1733.33	1566.67	1883.33	1233.33	0
	23.41	600	1733.33	1516.67	1266.67	1583.33	1483.33	1750	1316.67	0
	23.42	533.333	1800	1450	1416.67	1533.33	1416.67	1700	1483.33	0
	23.43	583.333	1800	1416.67	1550	1700	1500	1616.67	1516.67	0
	23.44	633.333	1850	1400	1500	1750	1483.33	1666.67	1500	0
	23.45	650	1533.33	1500	1500	1633.33	1366.67	1800	1650	0
	23.46	616.667	1433.33	1583.33	1566.67	1666.67	1266.67	1916.67	1700	0
	23.47	633.333	1483.33	1766.67	1550	1666.67	1283.33	1800	1450	0
	23.48	666.667	1566.67	1800	1633.33	1566.67	1466.67	1666.67	1316.67	0
	23.49	533.333	1700	1783.33	1700	1650	1400	1450	1300	0
	23.5	666.667	1550	1600	1583.33	1616.67	1350	1533.33	1383.33	0
	23.51	700	1550	1583.33	1450	1500	1400	1683.33	1416.67	0
	23.52	633.333	1583.33	1600	1450	1516.67	1333.33	1766.67	1466.67	0
	23.53	600	1583.33	1500	1500	1616.67	1300	1716.67	1650	0
	23.54	633.333	1583.33	1716.67	1583.33	1450	1416.67	1700	1650	0
	23.55	800	1400	1683.33	1516.67	1600	1466.67	1833.33	1500	0
	23.56	766.667	1416.67	1433.33	1466.67	1550	1350	1750	1433.33	0
	23.57	566.667	1466.67	1583.33	1333.33	1550	1300	1750	1500	0
	23.58	600	1600	1750	1450	1666.67	1350	1883.33	1450	0
	23.59	683.333	1583.33	1733.33	1583.33	1633.33	1533.33	1900	1466.67	0
	23.6	633.333	1533.33	1550	1816.67	1683.33	1500	1833.33	1483.33	0
	23.61	666.667	1550	1633.33	1716.67	1616.67	1483.33	1733.33	1650	0
	23.62	733.333	1683.33	1666.67	1700	1383.33	1333.33	1750	1650	0
	23.63	683.333	1483.33	1750	1766.67	1233.33	1400	1700	1616.67	0
	23.64	566.667	1583.33	1750	1650	1566.67	1283.33	1800	1633.33	0
	23.65	566.667	1483.33	1633.33	1533.33	1683.33	1266.67	1766.67	1450	0
	23.66	683.333	1466.67	1500	1716.67	1683.33	1316.67	1733.33	1650	0
	23.67	666.667	1566.67	1416.67	1633.33	1550	1283.33	1766.67	1533.33	0
	23.68	700	1616.67	1550	1566.67	1450	1183.33	1933.33	1583.33	0
	23.69	700	1800	1666.67	1633.33	1533.33	1233.33	1883.33	1566.67	0
	23.7	666.667	1716.67	1716.67	1633.33	1500	1350	1766.67	1500	0
	23.71	566.667	1566.67	1766.67	1616.67	1550	1433.33	1866.67	1450	0
	23.72	666.667	1683.33	1766.67	1583.33	1616.67	1450	1783.33	1383.33	0
	23.73	666.667	1816.67	1866.67	1566.67	1516.67	1333.33	1550	1300	0
	23.74	600	1666.67	1666.67	1600	1600	1216.67	1583.33	1283.33	0
	23.75	666.667	1550	1633.33	1600	1516.67	1316.67	1666.67	1416.67	0
	23.76	700	1700	1533.33	1600	1366.67	1450	1733.33	1566.67	0
	23.77	600	1750	1583.33	1583.33	1483.33	1533.33	1766.67	1550	0
	23.78	600	1633.33	1616.67	1750	1566.67	1483.33	1666.67	1516.67	0
	23.79	616.667	1583.33	1666.67	1766.67	1516.67	1450	1616.67	1500	0
	23.8	600	1583.33	1733.33	1466.67	1516.67	1516.67	1683.33	1516.67	0
	23.81	683.333	1633.33	1516.67	1600	1483.33	1600	1866.67	1416.67	0
	23.82	600	1583.33	1616.67	1533.33	1550	1250	1700	1366.67	0
	23.83	616.667	1633.33	1683.33	1500	1600	1400	1616.67	1316.67	0
	23.84	616.667	1683.33	1683.33	1400	1516.67	1350	1683.33	1366.67	0
	23.85	800	1533.33	1633.33	1416.67	1600	1366.67	1733.33	1466.67	0
	23.86	833.333	1400	1766.67	1583.33	1533.33	1450	1750	1383.33	0
	23.87	816.667	1650	1583.33	1366.67	1533.33	1466.67	1733.33	1483.33	0
	23.88	866.667	1616.67	1600	1500	1700	1483.33	1666.67	1700	0
	23.89	716.667	1666.67	1633.33	1516.67	1666.67	1350	1650	1783.33	0
	23.9	700	1766.67	1816.67	1516.67	1500	1233.33	1583.33	1533.33	0
	23.91	650	1600	1733.33	1683.33	1350	1266.67	1650	1433.33	0
	23.92	633.333	1666.67	1550	1550	1450	1250	1700	1500	0
	23.93	616.667	1600	1533.33	1483.33	1500	1183.33	1666.67	1466.67	0
	23.94	683.333	1466.67	1583.33	1533.33	1583.33	1250	1700	1550	0
	23.95	783.333	1450	1716.67	1516.67	1633.33	1383.33	1700	1733.33	0
	23.96	733.333	1616.67	1650	1566.67	1666.67	1333.33	1766.67	1600	0
	23.97	650	1566.67	1550	1633.33	1500	1316.67	1650	1433.33	0
	23.98	700	1700	1600	1483.33	1483.33	1350	1633.33	1416.67	0
	23.99	733.333	1800	1616.67	1516.67	1516.67	1300	1566.67	1350	0
	24	700	1916.67	1616.67	1516.67	1533.33	1283.33	1716.67	1433.33	0
	24.01	716.667	1716.67	1583.33	1716.67	1550	1383.33	1700	1350	0
	24.02	650	1666.67	1616.67	1783.33	1516.67	1450	1600	1416.67	0
	24.03	516.667	1533.33	1850	1766.67	1733.33	1383.33	1616.67	1383.33	0
	24.04	533.333	1500	1916.67	1533.33	1783.33	1283.33	1650	1350	0
	24.05	633.333	1533.33	1650	1400	1716.67	1333.33	1750	1633.33	0
	24.06	666.667	1633.33	1516.67	1483.33	1616.67	1416.67	1716.67	1616.67	0
	24.07	650	1683.33	1366.67	1483.33	1550	1216.67	1783.33	1666.67	0
	24.08	583.333	1683.33	1350	1616.67	1383.33	1216.67	1616.67	1433.33	0
	24.09	616.667	1533.33	1483.33	1516.67	1400	1183.33	1466.67	1416.67	0
	24.1	800	1466.67	1500	1600	1516.67	1283.33	1450	1400	0
	24.11	650	1500	1466.67	1583.33	1566.67	1233.33	1550	1400	0
	24.12	533.333	1633.33	1666.67	1483.33	1616.67	1116.67	1666.67	1400	0
	24.13	666.667	1750	1716.67	1600	1633.33	1283.33	1566.67	1366.67	0
	24.14	700	1866.67	1700	1533.33	1550	1400	1616.67	1400	0
	24.15	666.667	1600	1633.33	1450	1566.67	1350	1700	1400	0
	24.16	716.667	1333.33	1600	1616.67	1600	1366.67	1633.33	1383.33	0
	24.17	650	1400	1650	1600	1550	1466.67	1650	1416.67	0
	24.18	583.333	1466.67	1666.67	1516.67	1500	1516.67	1583.33	1333.33	0
	24.19	683.333	1583.33	1666.67	1550	1566.67	1516.67	1583.33	1500	0
	24.2	750	1716.67	1583.33	1600	1750	1483.33	1666.67	1483.33	0
	24.21	666.667	1733.33	1550	1633.33	1500	1350	1750	1400	0
	24.22	550	1566.67	1600	1533.33	1450	1266.67	1850	1550	0
	24.23	533.333	1566.67	1633.33	1633.33	1450	1233.33	1650	1616.67	0
	24.24	516.667	1750	1616.67	1516.67	1550	1383.33	1583.33	1516.67	0
	24.25	533.333	1583.33	1733.33	1450	1650	1416.67	1783.33	1533.33	0
	24.26	500	1616.67	1666.67	1516.67	1433.33	1366.67	1900	1350	0
	24.27	616.667	1783.33	1800	1633.33	1400	1366.67	1816.67	1333.33	0
	24.28	566.667	1616.67	1766.67	1450	1533.33	1300	2033.33	1483.33	0
	24.29	483.333	1583.33	1550	1433.33	1533.33	1200	1850	1400	0
	24.3	550	1483.33	1766.67	1483.33	1550	1266.67	1700	1366.67	0
	24.31	566.667	1533.33	1766.67	1483.33	1600	1316.67	1766.67	1333.33	0
	24.32	550	1616.67	1600	1666.67	1516.67	1216.67	1866.67	1433.33	0
	24.33	600	1566.67	1500	1600	1350	1283.33	1816.67	1450	0
	24.34	666.667	1583.33	1500	1533.33	1566.67	1366.67	1650	1300	0
	24.35	700	1716.67	1483.33	1416.67	1716.67	1516.67	1600	1350	0
	24.36	600	1550	1533.33	1383.33	1633.33	1433.33	1700	1433.33	0
	24.37	583.333	1433.33	1466.67	1516.67	1466.67	1266.67	1550	1516.67	0
	24.38	500	1466.67	1433.33	1533.33	1333.33	1150	1616.67	1516.67	0
	24.39	516.667	1566.67	1566.67	1366.67	1283.33	1233.33	1700	1466.67	0
	24.4	650	1716.67	1533.33	1333.33	1383.33	1433.33	1716.67	1466.67	0
	24.41	666.667	1666.67	1583.33	1400	1416.67	1383.33	1666.67	1500	0
	24.42	616.667	1633.33	1550	1350	1383.33	1350	1716.67	1416.67	0
	24.43	616.667	1633.33	1500	1450	1500	1300	1683.33	1466.67	0
	24.44	616.667	1500	1516.67	1566.67	1650	1433.33	1616.67	1350	0
	24.45	600	1400	1666.67	1650	1666.67	1366.67	1666.67	1483.33	0
	24.46	633.333	1783.33	1733.33	1550	1433.33	1350	1666.67	1383.33	0
	24.47	666.667	1916.67	1583.33	1300	1400	1483.33	1616.67	1266.67	0
	24.48	550	1566.67	1633.33	1466.67	1450	1233.33	1550	1416.67	0
	24.49	650	1600	1950	1533.33	1416.67	1416.67	1766.67	1383.33	0
	24.5	600	1566.67	1816.67	1583.33	1483.33	1450	1850	1350	0
	24.51	516.667	1483.33	1583.33	1583.33	1550	1283.33	1583.33	1400	0
	24.52	683.333	1633.33	1700	1516.67	1650	1100	1600	1416.67	0
	24.53	633.333	1700	1466.67	1350	1516.67	1266.67	1633.33	1416.67	0
	24.54	583.333	1683.33	1433.33	1400	1516.67	1400	1600	1500	0
	24.55	533.333	1866.67	1300	1400	1550	1366.67	1616.67	1516.67	0
	24.56	600	1883.33	1400	1366.67	1566.67	1366.67	1600	1566.67	0
	24.57	683.333	1650	1500	1450	1450	1366.67	1700	1650	0
	24.58	666.667	1666.67	1483.33	1550	1400	1450	1783.33	1633.33	0
	24.59	666.667	1700	1683.33	1533.33	1450	1416.67	1683.33	1683.33	0
	24.6	633.333	1616.67	1716.67	1466.67	1650	1233.33	1650	1666.67	0
	24.61	483.333	1450	1616.67	1616.67	1566.67	1333.33	1783.33	1616.67	0
	24.62	433.333	1616.67	1533.33	1516.67	1500	1216.67	1733.33	1316.67	0
	24.63	566.667	1633.33	1650	1566.67	1533.33	1200	1716.67	1350	0
	24.64	550	1583.33	1683.33	1550	1416.67	1266.67	1783.33	1400	0
	24.65	600	1716.67	1483.33	1566.67	1533.33	1316.67	1566.67	1316.67	0
	24.66	533.333	1733.33	1566.67	1650	1516.67	1350	1600	1416.67	0
	24.67	533.333	1550	1616.67	1516.67	1583.33	1300	1650	1383.33	0
	24.68	500	1566.67	1666.67	1450	1600	1233.33	1533.33	1383.33	0
	24.69	583.333	1750	1700	1400	1533.33	1216.67	1633.33	1450	0
	24.7	716.667	1750	1600	1516.67	1516.67	1416.67	1550	1583.33	0
	24.71	633.333	1616.67	1500	1566.67	1200	1500	1350	1533.33	0
	24.72	650	1616.67	1783.33	1483.33	1416.67	1516.67	1500	1333.33	0
	24.73	633.333	1716.67	1816.67	1600	1566.67	1200	1716.67	1350	0
	24.74	650	1516.67	1516.67	1433.33	1533.33	1200	1550	1316.67	0
	24.75	833.333	1633.33	1700	1600	1600	1183.33	1616.67	1350	0
	24.76	750	1700	1733.33	1650	1416.67	1316.67	1366.67	1316.67	0
	24.77	616.667	1733.33	1516.67	1583.33	1416.67	1316.67	1416.67	1450	0
	24.78	683.333	1550	1483.33	1600	1516.67	1216.67	1683.33	1700	0
	24.79	650	1516.67	1583.33	1416.67	1550	1266.67	1666.67	1483.33	0
	24.8	600	1633.33	1416.67	1566.67	1466.67	1316.67	1566.67	1200	0
	24.81	633.333	1600	1416.67	1700	1400	1200	1750	1250	0
	24.82	616.667	1466.67	1450	1716.67	1500	1183.33	1566.67	1300	0
	24.83	550	1283.33	1466.67	1583.33	1566.67	1200	1550	1550	0
	24.84	500	1400	1766.67	1516.67	1533.33	1183.33	1600	1616.67	0
	24.85	583.333	1433.33	1800	1416.67	1450	1033.33	1633.33	1450	0
	24.86	700	1650	1666.67	1500	1450	1016.67	1700	1416.67	0
	24.87	750	1583.33	1783.33	1583.33	1483.33	1133.33	1616.67	1466.67	0
	24.88	633.333	1600	1733.33	1516.67	1500	1083.33	1466.67	1633.33	0
	24.89	716.667	1633.33	1600	1500	1366.67	1050	1500	1516.67	0
	24.9	616.667	1516.67	1566.67	1516.67	1450	1283.33	1633.33	1416.67	0
	24.91	583.333	1433.33	1516.67	1433.33	1516.67	1416.67	1583.33	1316.67	0
	24.92	800	1716.67	1566.67	1350	1633.33	1316.67	1683.33	1350	0
	24.93	750	1600	1616.67	1550	1566.67	1183.33	1666.67	1283.33	0
	24.94	650	1250	1683.33	1516.67	1433.33	1216.67	1533.33	1083.33	0
	24.95	700	1400	1750	1566.67	1433.33	1250	1650	1316.67	0
	24.96	733.333	1533.33	1700	1400	1416.67	1166.67	1583.33	1416.67	0
	24.97	516.667	1650	1616.67	1416.67	1383.33	1200	1700	1416.67	0
	24.98	533.333	1750	1516.67	1500	1350	1183.33	1733.33	1266.67	0
	24.99	666.667	1666.67	1433.33	1566.67	1350	1216.67	1800	1350	0
	25	616.667	1433.33	1400	1483.33	1450	1316.67	1816.67	1400	0
	25.01	616.667	1516.67	1400	1400	1533.33	1366.67	1650	1416.67	0
	25.02	666.667	1500	1533.33	1450	1550	1133.33	1666.67	1383.33	0
	25.03	616.667	1350	1816.67	1400	1416.67	1116.67	1566.67	1300	0
	25.04	566.667	1616.67	1883.33	1466.67	1366.67	1266.67	1516.67	1233.33	0
	25.05	633.333	1666.67	1733.33	1450	1416.67	1383.33	1516.67	1583.33	0
	25.06	766.667	1416.67	1550	1450	1550	1450	1733.33	1533.33	0
	25.07	733.333	1416.67	1600	1366.67	1483.33	1200	1616.67	1283.33	0
	25.08	650	1433.33	1550	1550	1566.67	1133.33	1633.33	1383.33	0
	25.09	600	1416.67	1683.33	1516.67	1533.33	1233.33	1633.33	1500	0
	25.1	650	1516.67	1650	1483.33	1333.33	1316.67	1516.67	1633.33	0
	25.11	566.667	1600	1516.67	1416.67	1216.67	1283.33	1516.67	1383.33	0
	25.12	566.667	1600	1616.67	1516.67	1466.67	1150	1466.67	1366.67	0
	25.13	783.333	1633.33	1733.33	1483.33	1350	1150	1466.67	1533.33	0
	25.14	733.333	1616.67	1700	1500	1566.67	1083.33	1633.33	1316.67	0
	25.15	683.333	1483.33	1466.67	1633.33	1783.33	1200	1466.67	1383.33	0
	25.16	566.667	1483.33	1550	1666.67	1650	1416.67	1483.33	1400	0
	25.17	566.667	1466.67	1633.33	1650	1500	1350	1583.33	1433.33	0
	25.18	700	1466.67	1500	1450	1450	1183.33	1516.67	1433.33	0
	25.19	616.667	1433.33	1383.33	1333.33	1550	1200	1700	1466.67	0
	25.2	566.667	1416.67	1500	1333.33	1566.67	1083.33	1600	1250	0
	25.21	733.333	1333.33	1600	1350	1533.33	1133.33	1516.67	1350	0
	25.22	733.333	1450	1583.33	1366.67	1466.67	1233.33	1516.67	1416.67	0
	25.23	683.333	1533.33	1566.67	1466.67	1316.67	1133.33	1550	1450	0
	25.24	600	1433.33	1533.33	1500	1233.33	1216.67	1566.67	1300	0
	25.25	600	1416.67	1483.33	1666.67	1433.33	1316.67	1600	1400	0
	25.26	616.667	1700	1683.33	1616.67	1333.33	1350	1500	1333.33	0
	25.27	666.667	1783.33	1833.33	1616.67	1233.33	1183.33	1616.67	1350	0
	25.28	716.667	1633.33	1533.33	1533.33	1316.67	1116.67	1783.33	1500	0
	25.29	600	1433.33	1666.67	1483.33	1500	1316.67	1516.67	1316.67	0
	25.3	500	1516.67	1750	1650	1550	1383.33	1616.67	1166.67	0
	25.31	516.667	1450	1666.67	1600	1566.67	1283.33	1716.67	1266.67	0
	25.32	450	1383.33	1583.33	1533.33	1633.33	1166.67	1600	1433.33	0
	25.33	466.667	1566.67	1666.67	1483.33	1516.67	1050	1566.67	1400	0
	25.34	583.333	1350	1550	1516.67	1316.67	1150	1750	1366.67	0
	25.35	733.333	1316.67	1466.67	1633.33	1383.33	1083.33	1800	1266.67	0
	25.36	766.667	1450	1383.33	1483.33	1416.67	1150	1816.67	1200	0
	25.37	700	1466.67	1400	1516.67	1366.67	1450	1466.67	1383.33	0
	25.38	733.333	1316.67	1516.67	1383.33	1283.33	1333.33	1533.33	1400	0
	25.39	633.333	1416.67	1566.67	1433.33	1400	1216.67	1616.67	1450	0
	25.4	600	1616.67	1700	1300	1283.33	1166.67	1583.33	1450	0
	25.41	533.333	1666.67	1666.67	1333.33	1333.33	1150	1683.33	1333.33	0
	25.42	600	1800	1583.33	1416.67	1450	1366.67	1633.33	1383.33	0
	25.43	716.667	1550	1600	1416.67	1450	1250	1516.67	1466.67	0
	25.44	733.333	1383.33	1550	1550	1183.33	1183.33	1483.33	1400	0
	25.45	650	1516.67	1416.67	1566.67	1366.67	1116.67	1566.67	1316.67	0
	25.46	516.667	1400	1550	1566.67	1450	1083.33	1516.67	1133.33	0
	25.47	616.667	1483.33	1566.67	1333.33	1433.33	1166.67	1583.33	1266.67	0
	25.48	783.333	1450	1566.67	1500	1466.67	1083.33	1450	1433.33	0
	25.49	800	1300	1566.67	1666.67	1500	1133.33	1550	1366.67	0
	25.5	750	1300	1450	1483.33	1433.33	1100	1500	1350	0
	25.51	666.667	1433.33	1450	1283.33	1283.33	1183.33	1316.67	1200	0
	25.52	550	1800	1300	1333.33	1416.67	1133.33	1516.67	1300	0
	25.53	666.667	1450	1366.67	1616.67	1350	1200	1666.67	1400	0
	25.54	650	1400	1333.33	1483.33	1600	1283.33	1516.67	1333.33	0
	25.55	600	1500	1350	1566.67	1250	1333.33	1600	1183.33	0
	25.56	500	1466.67	1633.33	1650	1300	1216.67	1733.33	1333.33	0
	25.57	616.667	1533.33	1500	1650	1583.33	1033.33	1683.33	1300	0
	25.58	716.667	1450	1533.33	1483.33	1350	1150	1733.33	1283.33	0
	25.59	533.333	1350	1550	1466.67	1283.33	983.333	1500	1383.33	0
	25.6	600	1500	1583.33	1350	1216.67	1166.67	1566.67	1466.67	0
	25.61	550	1516.67	1683.33	1333.33	1200	1216.67	1450	1366.67	0
	25.62	533.333	1333.33	1700	1350	1366.67	1250	1300	1216.67	0
	25.63	583.333	1450	1650	1333.33	1516.67	1166.67	1466.67	1300	0
	25.64	566.667	1433.33	1583.33	1400	1383.33	1083.33	1650	1300	0
	25.65	583.333	1300	1516.67	1533.33	1400	1016.67	1716.67	1400	0
	25.66	566.667	1433.33	1400	1666.67	1216.67	1016.67	1616.67	1366.67	0
	25.67	600	1516.67	1533.33	1550	1316.67	1166.67	1600	1333.33	0
	25.68	650	1433.33	1450	1500	1483.33	1333.33	1733.33	1333.33	0
	25.69	683.333	1383.33	1616.67	1483.33	1383.33	1133.33	1466.67	1333.33	0
	25.7	700	1316.67	1700	1583.33	1333.33	1083.33	1683.33	1350	0
	25.71	600	1483.33	1516.67	1516.67	1333.33	1416.67	1583.33	1416.67	0
	25.72	666.667	1416.67	1333.33	1383.33	1416.67	1266.67	1583.33	1300	0
	25.73	666.667	1266.67	1500	1466.67	1516.67	1233.33	1483.33	1183.33	0
	25.74	550	1133.33	1616.67	1333.33	1433.33	1166.67	1516.67	1283.33	0
	25.75	583.333	1350	1700	1250	1516.67	1266.67	1333.33	1083.33	0
	25.76	533.333	1566.67	1616.67	1200	1400	1083.33	1450	1333.33	0
	25.77	550	1500	1566.67	1283.33	1416.67	950	1600	1183.33	0
	25.78	633.333	1366.67	1450	1416.67	1483.33	1050	1400	1283.33	0
	25.79	516.667	1533.33	1300	1316.67	1400	1083.33	1500	1416.67	0
	25.8	716.667	1350	1383.33	1450	1566.67	1300	1516.67	1466.67	0
	25.81	516.667	1483.33	1633.33	1533.33	1250	1233.33	1633.33	1333.33	0
	25.82	500	1633.33	1600	1350	1250	1300	1633.33	1266.67	0
	25.83	700	1416.67	1683.33	1450	1416.67	1216.67	1400	1166.67	0
	25.84	633.333	1250	1600	1500	1600	1250	1250	1300	0
	25.85	533.333	1400	1466.67	1550	1383.33	1216.67	1483.33	1433.33	0
	25.86	600	1466.67	1650	1333.33	1383.33	1150	1600	1416.67	0
	25.87	583.333	1216.67	1500	1316.67	1466.67	1100	1483.33	1383.33	0
	25.88	600	1350	1433.33	1533.33	1350	1083.33	1283.33	1316.67	0
	25.89	633.333	1533.33	1483.33	1433.33	1250	1133.33	1466.67	1383.33	0
	25.9	633.333	1383.33	1550	1350	1366.67	1133.33	1450	1283.33	0
	25.91	583.333	1383.33	1616.67	1333.33	1266.67	1300	1600	1316.67	0
	25.92	516.667	1500	1533.33	1416.67	1166.67	1183.33	1550	1333.33	0
	25.93	616.667	1666.67	1566.67	1350	1433.33	1150	1283.33	1550	0
	25.94	616.667	1566.67	1616.67	1533.33	1350	1133.33	1333.33	1383.33	0
	25.95	516.667	1483.33	1383.33	1450	1266.67	1100	1383.33	1183.33	0
	25.96	733.333	1583.33	1500	1283.33	1433.33	1100	1483.33	1216.67	0
	25.97	766.667	1633.33	1350	1233.33	1650	1133.33	1466.67	1266.67	0
	25.98	716.667	1683.33	1650	1300	1500	1250	1450	1350	0
	25.99	750	1516.67	1566.67	1550	1300	1283.33	1666.67	1200	0
	26	683.333	1550	1500	1600	1416.67	1233.33	1666.67	1166.67	0
	26.01	616.667	1500	1300	1516.67	1400	1233.33	1383.33	1300	0
	26.02	633.333	1450	1283.33	1616.67	1383.33	1100	1433.33	1333.33	0
	26.03	733.333	1483.33	1516.67	1483.33	1400	1000	1683.33	1366.67	0
	26.04	716.667	1433.33	1516.67	1416.67	1183.33	1183.33	1666.67	1350	0
	26.05	533.333	1350	1500	1583.33	1366.67	1050	1450	1366.67	0
	26.06	533.333	1533.33	1616.67	1483.33	1450	950	1366.67	1433.33	0
	26.07	650	1516.67	1516.67	1250	1483.33	1116.67	1533.33	1200	0
	26.08	650	1400	1616.67	1266.67	1450	1250	1716.67	1250	0
	26.09	633.333	1166.67	1666.67	1366.67	1333.33	1250	1616.67	1300	0
	26.1	500	1233.33	1466.67	1400	1450	1050	1333.33	1250	0
	26.11	583.333	1433.33	1466.67	1283.33	1483.33	933.333	1450	1350	0
	26.12	533.333	1533.33	1416.67	1433.33	1366.67	1033.33	1383.33	1383.33	0
	26.13	733.333	1600	1200	1416.67	1216.67	1133.33	1466.67	1333.33	0
	26.14	800	1450	1300	1266.67	1383.33	1166.67	1350	1200	0
	26.15	766.667	1300	1500	1266.67	1333.33	1166.67	1350	1550	0
	26.16	766.667	1350	1450	1600	1283.33	1033.33	1433.33	1633.33	0
	26.17	700	1383.33	1483.33	1316.67	1333.33	1200	1250	1283.33	0
	26.18	733.333	1316.67	1533.33	1200	1350	1066.67	1250	1200	0
	26.19	600	1450	1316.67	1550	1116.67	1066.67	1450	1283.33	0
	26.2	650	1383.33	1566.67	1516.67	1266.67	1016.67	1550	1250	0
	26.21	766.667	1466.67	1633.33	1616.67	1233.33	1116.67	1450	1216.67	0
	26.22	783.333	1400	1550	1500	1400	1183.33	1300	1283.33	0
	26.23	600	1433.33	1450	1283.33	1533.33	1250	1550	1266.67	0
	26.24	483.333	1466.67	1433.33	1383.33	1433.33	1100	1483.33	1250	0
	26.25	683.333	1450	1450	1433.33	1333.33	1000	1583.33	1216.67	0
	26.26	666.667	1416.67	1633.33	1433.33	1483.33	1066.67	1633.33	1216.67	0
	26.27	716.667	1366.67	1783.33	1450	1400	1200	1483.33	1200	0
	26.28	600	1333.33	1400	1333.33	1316.67	1100	1533.33	1183.33	0
	26.29	500	1300	1250	1300	1383.33	916.667	1516.67	1266.67	0
	26.3	600	1283.33	1583.33	1500	1350	900	1416.67	1233.33	0
	26.31	616.667	1433.33	1566.67	1366.67	1450	966.667	1483.33	1266.67	0
	26.32	850	1383.33	1333.33	1350	1433.33	1050	1450	1433.33	0
	26.33	733.333	1316.67	1683.33	1300	1366.67	1200	1383.33	1500	0
	26.34	733.333	1283.33	1700	1316.67	1266.67	1200	1650	1550	0
	26.35	766.667	1350	1433.33	1500	1450	1233.33	1616.67	1350	0
	26.36	700	1450	1533.33	1266.67	1283.33	1200	1383.33	1250	0
	26.37	583.333	1266.67	1283.33	1550	1250	1266.67	1500	1066.67	0
	26.38	750	1200	1250	1483.33	1450	1083.33	1533.33	1233.33	0
	26.39	700	1500	1416.67	1250	1550	1033.33	1616.67	1250	0
	26.4	666.667	1400	1600	1433.33	1333.33	1216.67	1483.33	1366.67	0
	26.41	700	1316.67	1583.33	1233.33	1283.33	850	1583.33	1383.33	0
	26.42	566.667	1266.67	1383.33	1350	1033.33	1050	1716.67	1333.33	0
	26.43	533.333	1500	1250	1266.67	1266.67	1116.67	1516.67	1216.67	0
	26.44	650	1716.67	1466.67	1466.67	1283.33	1233.33	1466.67	1300	0
	26.45	716.667	1500	1500	1633.33	1283.33	1233.33	1400	1316.67	0
	26.46	683.333	1416.67	1450	1583.33	1400	1216.67	1566.67	1350	0
	26.47	550	1433.33	1516.67	1450	1333.33	1116.67	1766.67	1283.33	0
	26.48	600	1400	1600	1400	1400	1000	1650	1316.67	0
	26.49	666.667	1566.67	1483.33	1233.33	1533.33	1083.33	1633.33	1250	0
	26.5	600	1600	1366.67	1316.67	1366.67	1083.33	1450	1216.67	0
	26.51	533.333	1500	1383.33	1400	1316.67	1066.67	1400	1283.33	0
	26.52	616.667	1433.33	1433.33	1466.67	1266.67	1100	1333.33	1200	0
	26.53	783.333	1266.67	1350	1666.67	1383.33	1133.33	1383.33	1016.67	0
	26.54	766.667	1400	1233.33	1483.33	1316.67	1200	1500	1050	0
	26.55	616.667	1450	1416.67	1450	1150	1100	1550	1100	0
	26.56	783.333	1516.67	1583.33	1283.33	1516.67	1166.67	1450	1100	0
	26.57	833.333	1583.33	1483.33	1266.67	1366.67	1083.33	1300	1250	0
	26.58	716.667	1683.33	1383.33	1450	1383.33	1500	1350	1250	0
	26.59	650	1466.67	1516.67	1300	1383.33	1333.33	1600	1066.67	0
	26.6	683.333	1400	1550	1316.67	1283.33	966.667	1500	1050	0
	26.61	700	1383.33	1583.33	1083.33	1233.33	883.333	1383.33	1033.33	0
	26.62	666.667	1516.67	1433.33	1400	1300	1150	1416.67	1233.33	0
	26.63	583.333	1533.33	1366.67	1533.33	1466.67	1150	1466.67	1350	0
	26.64	533.333	1383.33	1383.33	1166.67	1400	1116.67	1500	1433.33	0
	26.65	533.333	1600	1483.33	1183.33	1250	1200	1600	1266.67	0
	26.66	683.333	1350	1433.33	1416.67	1366.67	1216.67	1483.33	1350	0
	26.67	700	1250	1433.33	1550	1500	1133.33	1533.33	1283.33	0
	26.68	666.667	1683.33	1433.33	1516.67	1483.33	1033.33	1400	1266.67	0
	26.69	700	1633.33	1450	1316.67	1250	1016.67	1350	1116.67	0
	26.7	916.667	1416.67	1433.33	1266.67	1300	1033.33	1383.33	966.667	0
	26.71	766.667	1350	1500	1500	1283.33	1183.33	1483.33	1116.67	0
	26.72	583.333	1366.67	1583.33	1516.67	1200	1216.67	1383.33	1300	0
	26.73	533.333	1416.67	1533.33	1566.67	1183.33	1033.33	1400	1333.33	0
	26.74	533.333	1333.33	1333.33	1366.67	1316.67	1000	1450	1166.67	0
	26.75	566.667	1316.67	1333.33	1350	1433.33	1100	1400	1133.33	0
	26.76	600	1283.33	1450	1516.67	1116.67	1100	1283.33	1250	0
	26.77	566.667	1333.33	1400	1216.67	1216.67	1083.33	1366.67	1200	0
	26.78	650	1216.67	1700	1216.67	1250	1083.33	1316.67	1233.33	0
	26.79	750	1550	1283.33	1450	1183.33	1166.67	1433.33	1316.67	0
	26.8	733.333	1500	1300	1483.33	1183.33	1150	1550	1000	0
	26.81	650	1500	1566.67	1300	1333.33	1100	1500	983.333	0
	26.82	650	1266.67	1383.33	1333.33	1233.33	1016.67	1416.67	1200	0
	26.83	583.333	1366.67	1283.33	1616.67	1183.33	1100	1383.33	1300	0
	26.84	533.333	1466.67	1616.67	1583.33	1200	1216.67	1266.67	1400	0
	26.85	600	1433.33	1366.67	1366.67	1300	1000	1400	1150	0
	26.86	650	1400	1450	1166.67	1200	1066.67	1416.67	1033.33	0
	26.87	716.667	1583.33	1416.67	1383.33	1316.67	1133.33	1533.33	1066.67	0
	26.88	700	1533.33	1300	1433.33	1283.33	1166.67	1583.33	1283.33	0
	26.89	716.667	1583.33	1383.33	1500	1333.33	1166.67	1566.67	1400	0
	26.9	766.667	1583.33	1366.67	1416.67	1350	1066.67	1533.33	1266.67	0
	26.91	666.667	1383.33	1416.67	1416.67	1200	1016.67	1400	1183.33	0
	26.92	533.333	1433.33	1450	1316.67	1216.67	950	1333.33	1166.67	0
	26.93	600	1400	1383.33	1400	1266.67	900	1400	1200	0
	26.94	616.667	1266.67	1333.33	1483.33	1266.67	1166.67	1516.67	1200	0
	26.95	650	1233.33	1533.33	1633.33	1166.67	1183.33	1383.33	1116.67	0
	26.96	566.667	1216.67	1450	1550	1100	1100	1383.33	1366.67	0
	26.97	750	1250	1300	1483.33	1216.67	1100	1383.33	1183.33	0
	26.98	716.667	1366.67	1333.33	1600	1200	1100	1550	1166.67	0
	26.99	683.333	1400	1616.67	1550	1266.67	1216.67	1383.33	1083.33	0
	27	583.333	1250	1466.67	1450	1316.67	1000	1400	1150	0
	27.01	516.667	1133.33	1483.33	1550	1433.33	1016.67	1383.33	1116.67	0
	27.02	533.333	1266.67	1600	1366.67	1216.67	1000	1300	1350	0
	27.03	600	1283.33	1516.67	1250	1350	1133.33	1216.67	1133.33	0
	27.04	733.333	1300	1483.33	1233.33	1250	1183.33	1316.67	1133.33	0
	27.05	650	1400	1500	1333.33	1200	1116.67	1266.67	1250	0
	27.06	600	1100	1333.33	1466.67	1083.33	1116.67	1300	1233.33	0
	27.07	650	1200	1250	1433.33	1250	1150	1116.67	1250	0
	27.08	683.333	1166.67	1283.33	1383.33	1100	1066.67	1166.67	1250	0
	27.09	766.667	1216.67	1483.33	1500	1300	950	1416.67	1300	0
	27.1	716.667	1200	1400	1566.67	1283.33	833.333	1416.67	1183.33	0
	27.11	800	1283.33	1333.33	1466.67	1233.33	833.333	1300	1283.33	0
	27.12	733.333	1366.67	1366.67	1433.33	1383.33	916.667	1350	1183.33	0
	27.13	700	1416.67	1383.33	1416.67	1216.67	916.667	1333.33	1150	0
	27.14	783.333	1350	1366.67	1483.33	1166.67	950	1350	1216.67	0
	27.15	633.333	1250	1416.67	1416.67	1250	1050	1266.67	1116.67	0
	27.16	633.333	1133.33	1266.67	1316.67	1150	1083.33	1366.67	1183.33	0
	27.17	533.333	1216.67	1350	1516.67	1350	883.333	1616.67	1183.33	0
	27.18	600	1400	1333.33	1416.67	1566.67	983.333	1550	1116.67	0
	27.19	600	1583.33	1300	1416.67	1483.33	1183.33	1266.67	1200	0
	27.2	566.667	1416.67	1383.33	1516.67	1300	1000	1550	1100	0
	27.21	516.667	1500	1266.67	1583.33	1200	1033.33	1483.33	1083.33	0
	27.22	650	1416.67	1366.67	1483.33	1133.33	1016.67	1416.67	1216.67	0
	27.23	600	1416.67	1300	1466.67	1050	916.667	1450	1033.33	0
	27.24	683.333	1500	1433.33	1500	1050	866.667	1516.67	1066.67	0
	27.25	516.667	1316.67	1383.33	1500	1116.67	950	1366.67	1150	0
	27.26	550	1350	1200	1350	1266.67	1016.67	1383.33	1166.67	0
	27.27	650	1350	1400	1500	1316.67	1033.33	1416.67	1233.33	0
	27.28	700	1266.67	1350	1650	1433.33	850	1400	1100	0
	27.29	616.667	1266.67	1266.67	1666.67	1366.67	883.333	1250	1150	0
	27.3	583.333	1333.33	1150	1400	1250	1066.67	1316.67	1233.33	0
	27.31	666.667	1350	1216.67	1466.67	1066.67	1033.33	1516.67	1116.67	0
	27.32	750	1416.67	1316.67	1483.33	1066.67	1133.33	1450	1200	0
	27.33	850	1333.33	1416.67	1400	1116.67	1233.33	1333.33	1283.33	0
	27.34	600	1333.33	1200	1500	1100	1166.67	1366.67	1416.67	0
	27.35	600	1233.33	1266.67	1266.67	1150	1200	1500	1416.67	0
	27.36	750	1233.33	1383.33	1133.33	1250	1116.67	1433.33	1266.67	0
	27.37	683.333	1350	1316.67	1333.33	1150	883.333	1250	1233.33	0
	27.38	783.333	1416.67	1200	1433.33	1216.67	850	1383.33	1066.67	0
	27.39	683.333	1366.67	1366.67	1400	1300	1050	1400	1100	0
	27.4	600	1333.33	1300	1350	1166.67	900	1366.67	1133.33	0
	27.41	550	1333.33	1216.67	1433.33	1283.33	900	1366.67	1050	0
	27.42	600	1366.67	1166.67	1583.33	1283.33	1100	1283.33	866.667	0
	27.43	716.667	1250	1400	1533.33	1216.67	1066.67	1350	866.667	0
	27.44	583.333	1300	1566.67	1466.67	950	966.667	1550	1133.33	0
	27.45	633.333	1383.33	1450	1350	1133.33	1016.67	1400	1100	0
	27.46	683.333	1616.67	1433.33	1233.33	1216.67	1083.33	1650	1183.33	0
	27.47	716.667	1433.33	1400	1250	1433.33	1066.67	1616.67	1000	0
	27.48	650	1466.67	1233.33	1316.67	1266.67	1016.67	1383.33	1133.33	0
	27.49	666.667	1466.67	1483.33	1366.67	1166.67	1050	1416.67	1216.67	0
	27.5	716.667	1433.33	1450	1566.67	1266.67	983.333	1550	1166.67	0
	27.51	766.667	1383.33	1516.67	1466.67	1350	983.333	1350	1183.33	0
	27.52	800	1450	1533.33	1333.33	1216.67	1050	1383.33	1066.67	0
	27.53	716.667	1300	1400	1516.67	1233.33	1083.33	1483.33	983.333	0
	27.54	650	1266.67	1483.33	1483.33	1250	983.333	1283.33	1116.67	0
	27.55	550	1283.33	1433.33	1316.67	1316.67	983.333	1333.33	1050	0
	27.56	600	1516.67	1350	1416.67	1233.33	983.333	1400	933.333	0
	27.57	650	1400	1366.67	1350	1283.33	1050	1466.67	1100	0
	27.58	733.333	1166.67	1566.67	1283.33	1200	1216.67	1400	1133.33	0
	27.59	600	1200	1450	1383.33	1150	1250	1333.33	1200	0
	27.6	550	1300	1250	1333.33	1083.33	1116.67	1266.67	1250	0
	27.61	583.333	1283.33	1283.33	1333.33	1133.33	1033.33	1233.33	1183.33	0
	27.62	633.333	1350	1433.33	1383.33	1200	1083.33	1150	1116.67	0
	27.63	666.667	1283.33	1416.67	1433.33	1300	1016.67	1133.33	1233.33	0
	27.64	700	1616.67	1466.67	1300	1233.33	1133.33	1100	1266.67	0
	27.65	583.333	1633.33	1300	1416.67	1133.33	1016.67	1283.33	1033.33	0
	27.66	633.333	1533.33	1450	1516.67	1200	933.333	1233.33	1016.67	0
	27.67	666.667	1400	1416.67	1433.33	1283.33	1000	1266.67	983.333	0
	27.68	633.333	1316.67	1333.33	1383.33	1300	1133.33	1333.33	1150	0
	27.69	666.667	1300	1233.33	1383.33	1116.67	1033.33	1383.33	1216.67	0
	27.7	633.333	1466.67	1216.67	1366.67	1066.67	933.333	1333.33	1083.33	0
	27.71	650	1416.67	1183.33	1300	1050	883.333	1300	1200	0
	27.72	683.333	1283.33	1166.67	1383.33	1133.33	950	1250	1183.33	0
	27.73	666.667	1300	1366.67	1350	1033.33	1033.33	1233.33	1100	0
	27.74	650	1283.33	1416.67	1283.33	1033.33	916.667	1383.33	883.333	0
	27.75	766.667	1383.33	1250	1333.33	1083.33	950	1416.67	966.667	0
	27.76	783.333	1283.33	1266.67	1400	950	1166.67	1466.67	1266.67	0
	27.77	783.333	1183.33	1400	1216.67	1150	1133.33	1300	1233.33	0
	27.78	700	1300	1366.67	1166.67	1266.67	966.667	1250	1116.67	0
	27.79	683.333	1350	1283.33	1316.67	1233.33	1083.33	1416.67	1066.67	0
	27.8	666.667	1400	1433.33	1350	1400	1033.33	1300	1100	0
	27.81	616.667	1600	1466.67	1350	1283.33	1083.33	1100	1216.67	0
	27.82	516.667	1483.33	1300	1433.33	1316.67	1166.67	1283.33	1200	0
	27.83	616.667	1266.67	1316.67	1433.33	1250	1033.33	1333.33	1300	0
	27.84	633.333	1416.67	1466.67	1383.33	1200	1016.67	1366.67	1200	0
	27.85	733.333	1333.33	1600	1433.33	1233.33	983.333	1316.67	1150	0
	27.86	733.333	1266.67	1483.33	1333.33	1083.33	950	1266.67	1033.33	0
	27.87	616.667	1350	1416.67	1266.67	1183.33	1000	1166.67	866.667	0
	27.88	650	1316.67	1383.33	1450	1316.67	1000	1383.33	983.333	0
	27.89	733.333	1433.33	1400	1516.67	1100	916.667	1466.67	1100	0
	27.9	750	1350	1416.67	1466.67	1000	916.667	1516.67	1266.67	0
	27.91	800	1216.67	1533.33	1533.33	1100	966.667	1516.67	1216.67	0
	27.92	666.667	1250	1400	1533.33	1250	900	1416.67	1216.67	0
	27.93	583.333	1383.33	1300	1483.33	1350	983.333	1350	1066.67	0
	27.94	666.667	1366.67	1433.33	1266.67	1116.67	1016.67	1233.33	1366.67	0
	27.95	733.333	1466.67	1433.33	1300	1166.67	966.667	1283.33	1183.33	0
	27.96	750	1450	1300	1316.67	1366.67	933.333	1333.33	1016.67	0
	27.97	683.333	1350	1400	1466.67	1183.33	933.333	1333.33	1016.67	0
	27.98	700	1400	1483.33	1433.33	1150	1016.67	1233.33	933.333	0
	27.99	716.667	1316.67	1283.33	1366.67	1200	1016.67	1266.67	1033.33	0
	28	666.667	1350	1200	1433.33	1200	1000	1216.67	1100	0
	28.01	716.667	1316.67	1316.67	1433.33	1216.67	933.333	1250	1150	0
	28.02	616.667	1433.33	1433.33	1350	1216.67	1016.67	1366.67	1133.33	0
	28.03	683.333	1300	1450	1400	1083.33	1133.33	1166.67	1200	0
	28.04	550	1133.33	1383.33	1450	1200	1083.33	1266.67	1083.33	0
	28.05	566.667	1283.33	1266.67	1300	1316.67	1083.33	1300	1183.33	0
	28.06	650	1366.67	1300	1316.67	1300	1016.67	1366.67	1233.33	0
	28.07	600	1250	1400	1233.33	1250	1133.33	1266.67	1166.67	0
	28.08	633.333	1300	1400	1266.67	1050	1066.67	1316.67	1016.67	0
	28.09	766.667	1366.67	1266.67	1216.67	1050	1016.67	1200	1016.67	0
	28.1	750	1416.67	1366.67	1183.33	983.333	1066.67	1233.33	1000	0
	28.11	583.333	1366.67	1333.33	1233.33	1116.67	983.333	1250	1083.33	0
	28.12	600	1366.67	1366.67	1383.33	1083.33	933.333	1183.33	1400	0
	28.13	650	1366.67	1450	1283.33	1166.67	900	1250	1316.67	0
	28.14	733.333	1500	1466.67	1350	1066.67	933.333	1366.67	1133.33	0
	28.15	700	1450	1366.67	1366.67	1033.33	933.333	1366.67	1066.67	0
	28.16	816.667	1283.33	1466.67	1366.67	1166.67	900	1316.67	1066.67	0
	28.17	866.667	1133.33	1416.67	1550	1283.33	983.333	1300	1250	0
	28.18	650	1266.67	1366.67	1500	1183.33	1100	1433.33	1250	0
	28.19	633.333	1250	1466.67	1300	1033.33	966.667	1383.33	1116.67	0
	28.2	683.333	1200	1433.33	1350	1066.67	866.667	1366.67	1000	0
	28.21	633.333	1366.67	1566.67	1516.67	1150	900	1366.67	1050	0
	28.22	666.667	1516.67	1566.67	1483.33	1216.67	1033.33	1300	1266.67	0
	28.23	616.667	1400	1483.33	1400	1200	1116.67	1283.33	1116.67	0
	28.24	683.333	1416.67	1500	1450	1233.33	1033.33	1383.33	1116.67	0
	28.25	700	1366.67	1583.33	1566.67	1233.33	1050	1250	1266.67	0
	28.26	766.667	1250	1450	1500	1266.67	1050	1416.67	1300	0
	28.27	750	1250	1450	1533.33	1150	1050	1333.33	1100	0
	28.28	616.667	1283.33	1533.33	1350	1266.67	933.333	1266.67	950	0
	28.29	583.333	1416.67	1333.33	1400	1266.67	883.333	1350	1216.67	0
	28.3	600	1366.67	1216.67	1583.33	1133.33	1050	1233.33	1050	0
	28.31	666.667	1400	1400	1450	1000	983.333	1316.67	1016.67	0
	28.32	666.667	1516.67	1366.67	1316.67	1216.67	1000	1300	1283.33	0
	28.33	650	1500	1250	1266.67	1166.67	983.333	1150	1216.67	0
	28.34	616.667	1333.33	1466.67	1333.33	1116.67	950	1050	1166.67	0
	28.35	583.333	1300	1516.67	1450	1216.67	916.667	1050	1183.33	0
	28.36	683.333	1433.33	1316.67	1433.33	1150	933.333	1316.67	1183.33	0
	28.37	716.667	1416.67	1383.33	1350	1166.67	916.667	1450	1016.67	0
	28.38	666.667	1366.67	1366.67	1333.33	1133.33	1000	1433.33	1016.67	0
	28.39	583.333	1250	1300	1233.33	1050	1050	1266.67	1066.67	0
	28.4	533.333	1266.67	1266.67	1283.33	1066.67	1050	1150	1100	0
	28.41	583.333	1400	1316.67	1316.67	1033.33	916.667	1166.67	1116.67	0
	28.42	650	1383.33	1366.67	1433.33	1116.67	833.333	1300	1233.33	0
	28.43	700	1433.33	1366.67	1383.33	1166.67	850	1266.67	1083.33	0
	28.44	600	1333.33	1366.67	1350	1200	900	1350	1000	0
	28.45	733.333	1350	1300	1400	1116.67	933.333	1316.67	1133.33	0
	28.46	783.333	1500	1316.67	1433.33	1200	1033.33	1233.33	1150	0
	28.47	716.667	1433.33	1400	1300	1200	1150	1166.67	1133.33	0
	28.48	616.667	1316.67	1283.33	1333.33	1150	1133.33	1250	1166.67	0
	28.49	683.333	1483.33	1400	1316.67	1100	1083.33	1133.33	1150	0
	28.5	750	1366.67	1450	1233.33	1150	916.667	1300	1050	0
	28.51	600	1416.67	1333.33	1366.67	1200	983.333	1216.67	1116.67	0
	28.52	666.667	1483.33	1350	1383.33	1233.33	1050	1216.67	1116.67	0
	28.53	600	1566.67	1333.33	1350	1250	1050	1283.33	1083.33	0
	28.54	783.333	1583.33	1250	1483.33	1183.33	1100	1300	1133.33	0
	28.55	966.667	1433.33	1333.33	1500	1133.33	1066.67	1250	1183.33	0
	28.56	833.333	1333.33	1383.33	1550	1183.33	1083.33	1233.33	1183.33	0
	28.57	716.667	1333.33	1466.67	1450	1233.33	950	1150	1166.67	0
	28.58	666.667	1416.67	1566.67	1350	1050	866.667	1300	1116.67	0
	28.59	650	1383.33	1566.67	1416.67	916.667	1016.67	1400	1066.67	0
	28.6	716.667	1466.67	1533.33	1383.33	1066.67	1133.33	1433.33	1083.33	0
	28.61	666.667	1450	1416.67	1500	1066.67	1116.67	1366.67	983.333	0
	28.62	616.667	1350	1350	1466.67	1066.67	1066.67	1316.67	933.333	0
	28.63	700	1366.67	1350	1300	1166.67	900	1283.33	966.667	0
	28.64	716.667	1516.67	1416.67	1300	1133.33	916.667	1083.33	933.333	0
	28.65	700	1500	1466.67	1383.33	1166.67	1000	1066.67	950	0
	28.66	733.333	1433.33	1366.67	1250	1166.67	883.333	1000	950	0
	28.67	783.333	1183.33	1550	1233.33	1100	916.667	1083.33	983.333	0
	28.68	666.667	1383.33	1566.67	1100	1200	933.333	1266.67	1166.67	0
	28.69	616.667	1500	1400	1233.33	1233.33	966.667	1233.33	1150	0
	28.7	600	1416.67	1316.67	1516.67	1100	983.333	1233.33	1050	0
	28.71	750	1366.67	1366.67	1433.33	1066.67	1133.33	1250	983.333	0
	28.72	683.333	1250	1566.67	1300	1150	1066.67	1250	966.667	0
	28.73	516.667	1200	1516.67	1583.33	1033.33	916.667	1250	1066.67	0
	28.74	683.333	1233.33	1316.67	1500	983.333	866.667	1383.33	1033.33	0
	28.75	683.333	1383.33	1500	1383.33	1000	883.333	1266.67	983.333	0
	28.76	700	1483.33	1466.67	1466.67	1066.67	1000	1350	1083.33	0
	28.77	700	1433.33	1433.33	1183.33	1150	1100	1366.67	1116.67	0
	28.78	650	1416.67	1416.67	1250	1066.67	933.333	1283.33	966.667	0
	28.79	666.667	1383.33	1416.67	1383.33	1133.33	833.333	1333.33	950	0
	28.8	800	1466.67	1433.33	1383.33	1266.67	916.667	1366.67	1066.67	0
	28.81	816.667	1450	1516.67	1333.33	1200	983.333	1533.33	1150	0
	28.82	766.667	1283.33	1466.67	1233.33	1183.33	1033.33	1516.67	1166.67	0
	28.83	666.667	1366.67	1416.67	1233.33	1216.67	1083.33	1533.33	1133.33	0
	28.84	666.667	1450	1416.67	1350	1133.33	1166.67	1383.33	1050	0
	28.85	616.667	1416.67	1383.33	1416.67	1216.67	1150	1200	1066.67	0
	28.86	583.333	1483.33	1333.33	1416.67	1300	1116.67	1200	1166.67	0
	28.87	600	1416.67	1400	1450	1200	1183.33	1183.33	1266.67	0
	28.88	700	1350	1500	1466.67	1050	1116.67	1216.67	1250	0
	28.89	716.667	1400	1250	1383.33	1050	916.667	1416.67	1233.33	0
	28.9	733.333	1333.33	1300	1500	1066.67	900	1500	1150	0
	28.91	716.667	1216.67	1400	1433.33	1216.67	983.333	1366.67	1050	0
	28.92	783.333	1300	1383.33	1416.67	1083.33	1133.33	1216.67	1050	0
	28.93	683.333	1333.33	1366.67	1366.67	1100	1133.33	1216.67	1150	0
	28.94	583.333	1300	1450	1366.67	1166.67	1150	1300	1133.33	0
	28.95	700	1250	1316.67	1250	1100	1083.33	1166.67	1166.67	0
	28.96	750	1266.67	1416.67	1316.67	1183.33	983.333	1133.33	1266.67	0
	28.97	683.333	1316.67	1516.67	1483.33	1250	900	1333.33	1116.67	0
	28.98	766.667	1216.67	1383.33	1433.33	1333.33	966.667	1383.33	1016.67	0
	28.99	733.333	1116.67	1500	1400	1233.33	883.333	1466.67	966.667	0
	29	633.333	1150	1366.67	1433.33	1116.67	900	1283.33	1000	0
	29.01	633.333	1366.67	1350	1483.33	1166.67	916.667	1150	1083.33	0
	29.02	683.333	1383.33	1333.33	1500	1116.67	850	1233.33	1116.67	0
	29.03	666.667	1366.67	1283.33	1466.67	1150	750	1300	1250	0
	29.04	650	1250	1350	1483.33	1316.67	750	1283.33	1183.33	0
	29.05	650	1266.67	1300	1416.67	1266.67	800	1200	1083.33	0
	29.06	700	1366.67	1283.33	1466.67	1183.33	933.333	1250	1033.33	0
	29.07	750	1350	1366.67	1383.33	1183.33	1000	1300	1100	0
	29.08	666.667	1333.33	1366.67	1350	1266.67	1016.67	1283.33	1066.67	0
	29.09	633.333	1233.33	1250	1350	1150	983.333	1366.67	1133.33	0
	29.1	650	1250	1300	1266.67	1050	933.333	1233.33	1166.67	0
	29.11	733.333	1316.67	1333.33	1383.33	1066.67	850	1200	1116.67	0
	29.12	650	1416.67	1300	1350	1016.67	983.333	1300	1016.67	0
	29.13	666.667	1466.67	1150	1366.67	950	1083.33	1400	966.667	0
	29.14	666.667	1333.33	1300	1300	1050	916.667	1200	1016.67	0
	29.15	733.333	1316.67	1533.33	1333.33	983.333	866.667	1350	1116.67	0
	29.16	666.667	1400	1366.67	1433.33	1083.33	816.667	1350	1050	0
	29.17	616.667	1283.33	1350	1550	1050	833.333	1366.67	1150	0
	29.18	783.333	1316.67	1350	1433.33	950	916.667	1300	1183.33	0
	29.19	866.667	1316.67	1466.67	1300	933.333	1016.67	1316.67	1150	0
	29.2	783.333	1433.33	1633.33	1400	983.333	1050	1266.67	1116.67	0
	29.21	716.667	1383.33	1366.67	1416.67	1083.33	1066.67	1216.67	1100	0
	29.22	650	1250	1300	1383.33	1100	1083.33	1283.33	1083.33	0
	29.23	700	1266.67	1483.33	1416.67	966.667	1050	1133.33	1083.33	0
	29.24	750	1250	1316.67	1366.67	966.667	1033.33	1066.67	1100	0
	29.25	700	1333.33	1300	1333.33	1033.33	966.667	1150	1050	0
	29.26	650	1383.33	1450	1266.67	1016.67	933.333	1350	1050	0
	29.27	616.667	1350	1333.33	1150	1116.67	916.667	1350	1066.67	0
	29.28	666.667	1316.67	1400	1166.67	1100	950	1266.67	1083.33	0
	29.29	666.667	1233.33	1450	1283.33	1066.67	950	1266.67	1083.33	0
	29.3	650	1316.67	1433.33	1233.33	1233.33	933.333	1350	1066.67	0
	29.31	633.333	1266.67	1416.67	1183.33	1250	850	1366.67	1066.67	0
	29.32	616.667	1316.67	1350	1133.33	1133.33	750	1233.33	1033.33	0
	29.33	600	1350	1383.33	1283.33	1050	1016.67	1150	1150	0
	29.34	683.333	1566.67	1233.33	1300	1200	1083.33	1133.33	1183.33	0
	29.35	733.333	1583.33	1433.33	1300	1100	1150	1216.67	1050	0
	29.36	733.333	1416.67	1516.67	1350	1100	1066.67	1250	1033.33	0
	29.37	666.667	1183.33	1483.33	1300	1050	1016.67	1300	983.333	0
	29.38	683.333	1216.67	1350	1266.67	1000	1000	1216.67	983.333	0
	29.39	766.667	1283.33	1383.33	1266.67	900	866.667	1250	1116.67	0
	29.4	666.667	1183.33	1366.67	1383.33	883.333	850	1333.33	1133.33	0
	29.41	650	1216.67	1366.67	1433.33	983.333	1033.33	1250	1100	0
	29.42	600	1216.67	1400	1333.33	1000	966.667	1200	950	0
	29.43	650	1283.33	1466.67	1250	1050	916.667	1233.33	916.667	0
	29.44	716.667	1366.67	1433.33	1350	1116.67	883.333	1166.67	983.333	0
	29.45	683.333	1400	1200	1350	1116.67	933.333	1116.67	966.667	0
	29.46	650	1383.33	1200	1333.33	1183.33	983.333	1116.67	1033.33	0
	29.47	716.667	1333.33	1433.33	1383.33	1166.67	1033.33	1066.67	1050	0
	29.48	700	1316.67	1550	1433.33	1016.67	1050	1116.67	933.333	0
	29.49	716.667	1233.33	1550	1516.67	1016.67	983.333	1233.33	916.667	0
	29.5	750	1233.33	1400	1450	983.333	916.667	1383.33	983.333	0
	29.51	766.667	1233.33	1483.33	1350	1100	900	1383.33	1050	0
	29.52	750	1283.33	1650	1233.33	1216.67	1000	1433.33	1066.67	0
	29.53	700	1350	1700	1216.67	1216.67	966.667	1300	1083.33	0
	29.54	733.333	1433.33	1533.33	1400	1150	866.667	1216.67	1116.67	0
	29.55	850	1316.67	1433.33	1500	1050	883.333	1183.33	1066.67	0
	29.56	766.667	1416.67	1683.33	1300	1000	983.333	1283.33	1150	0
	29.57	666.667	1416.67	1716.67	1283.33	1166.67	933.333	1216.67	1166.67	0
	29.58	733.333	1366.67	1583.33	1300	1300	933.333	1133.33	1100	0
	29.59	700	1350	1483.33	1283.33	1116.67	916.667	1266.67	1166.67	0
	29.6	883.333	1150	1550	1366.67	1016.67	966.667	1316.67	1133.33	0
	29.61	883.333	1183.33	1533.33	1316.67	1000	983.333	1250	1166.67	0
	29.62	916.667	1483.33	1366.67	1200	1066.67	983.333	1183.33	1116.67	0
	29.63	866.667	1466.67	1450	1183.33	1300	1050	1116.67	983.333	0
	29.64	800	1383.33	1383.33	1283.33	1283.33	966.667	1183.33	1016.67	0
	29.65	766.667	1383.33	1316.67	1450	1133.33	950	1250	1050	0
	29.66	750	1516.67	1366.67	1466.67	1083.33	1066.67	1283.33	1066.67	0
	29.67	683.333	1533.33	1416.67	1450	1150	1100	1316.67	1083.33	0
	29.68	683.333	1450	1383.33	1450	1066.67	900	1333.33	1150	0
	29.69	800	1483.33	1466.67	1300	983.333	900	1300	1150	0
	29.7	833.333	1383.33	1483.33	1216.67	1033.33	1033.33	1300	1133.33	0
	29.71	850	1166.67	1466.67	1166.67	900	1033.33	1233.33	966.667	0
	29.72	850	1233.33	1500	1116.67	966.667	966.667	1100	916.667	0
	29.73	850	1450	1483.33	1300	1066.67	1050	1016.67	983.333	0
	29.74	850	1433.33	1416.67	1483.33	1000	933.333	1050	1016.67	0
	29.75	783.333	1300	1400	1400	883.333	950	1083.33	1066.67	0
	29.76	816.667	1333.33	1500	1283.33	1150	1000	1133.33	1216.67	0
	29.77	766.667	1283.33	1500	1266.67	1283.33	883.333	1166.67	1233.33	0
	29.78	816.667	1266.67	1383.33	1200	1100	800	1333.33	1066.67	0
	29.79	783.333	1350	1266.67	1300	1133.33	900	1300	1016.67	0
	29.8	633.333	1233.33	1266.67	1433.33	1183.33	916.667	1250	816.667	0
	29.81	633.333	1150	1416.67	1433.33	1150	883.333	1383.33	766.667	0
	29.82	750	1333.33	1466.67	1400	1133.33	1016.67	1316.67	866.667	0
	29.83	800	1400	1450	1333.33	1116.67	1016.67	1400	900	0
	29.84	783.333	1416.67	1333.33	1283.33	1133.33	816.667	1233.33	966.667	0
	29.85	816.667	1483.33	1266.67	1266.67	1100	766.667	1050	1033.33	0
	29.86	833.333	1466.67	1333.33	1250	1033.33	950	1066.67	916.667	0
	29.87	816.667	1466.67	1366.67	1333.33	950	1000	1200	933.333	0
	29.88	733.333	1333.33	1466.67	1400	1000	966.667	1283.33	950	0
	29.89	683.333	1250	1583.33	1316.67	1116.67	933.333	1233.33	850	0
	29.9	700	1316.67	1566.67	1316.67	983.333	933.333	1233.33	950	0
	29.91	783.333	1333.33	1483.33	1383.33	950	933.333	1283.33	1000	0
	29.92	800	1216.67	1466.67	1350	950	933.333	1283.33	1000	0
	29.93	816.667	1200	1400	1300	1083.33	833.333	1200	1016.67	0
	29.94	800	1266.67	1416.67	1266.67	1133.33	933.333	1216.67	966.667	0
	29.95	683.333	1400	1516.67	1266.67	1116.67	1100	1266.67	883.333	0
	29.96	683.333	1383.33	1583.33	1383.33	1066.67	1100	1133.33	933.333	0
	29.97	716.667	1366.67	1500	1333.33	1066.67	983.333	1116.67	1133.33	0
[truncated: 5,003 more rows]

## Sheet: Figure 3_B
		Kubelka-Munk Function / -
	Wavelength / nm	b	c	d	e	f	g	h
	1500	0.0646846	0.0428362	0.0473296	0.0367695	0.0238674	0.0112262	0.0310678
	1499	0.0647252	0.0428791	0.0473545	0.0368324	0.0238185	0.0112293	0.0310549
	1498	0.0647671	0.04295	0.0473744	0.0368335	0.0238202	0.0112296	0.0309529
	1497	0.0648152	0.0430147	0.0473526	0.0368197	0.0237762	0.0111997	0.0308431
	1496	0.0648773	0.0430142	0.0473839	0.0367737	0.0237715	0.0112151	0.0308374
	1495	0.0649581	0.0430657	0.0473812	0.0367696	0.0237507	0.0111946	0.030839
	1494	0.0649473	0.0430487	0.0473931	0.0367671	0.0237588	0.0111964	0.030827
	1493	0.0650097	0.0431225	0.0474392	0.0367789	0.0237606	0.0112048	0.0308651
	1492	0.0650639	0.0431479	0.0475151	0.0367907	0.0237434	0.0111947	0.0308446
	1491	0.0650675	0.0431847	0.0475373	0.0368044	0.0237312	0.0112012	0.0307412
	1490	0.0650844	0.0431694	0.0475002	0.0367745	0.0236889	0.0111973	0.0307201
	1489	0.0650997	0.0432081	0.04745	0.036817	0.0236517	0.0111989	0.0307492
	1488	0.0650988	0.043259	0.0474621	0.0368224	0.0236482	0.0111953	0.0307146
	1487	0.0651791	0.043285	0.0475142	0.0368161	0.0236666	0.0112005	0.0307156
	1486	0.0653341	0.0433354	0.0475512	0.0368236	0.023647	0.0111777	0.0307749
	1485	0.0654086	0.0433583	0.0475155	0.036807	0.0236491	0.0111681	0.0306666
	1484	0.0656701	0.0434123	0.0475051	0.0368122	0.0236413	0.0111907	0.0306717
	1483	0.0657228	0.0434531	0.0474716	0.0368711	0.0236179	0.0111999	0.0307029
	1482	0.0656937	0.0435045	0.0474863	0.0368961	0.0235665	0.0112188	0.0306998
	1481	0.065826	0.0435519	0.0475454	0.0369326	0.0235307	0.0112219	0.0306985
	1480	0.0658012	0.0436049	0.0476053	0.0369327	0.023506	0.0112259	0.030683
	1479	0.0657612	0.0436349	0.0476901	0.0369233	0.0235203	0.0112186	0.0305725
	1478	0.0659943	0.0436939	0.0476499	0.0369092	0.0235046	0.0112126	0.0305361
	1477	0.0660206	0.0437426	0.0476867	0.0369188	0.0234923	0.0112242	0.0305599
	1476	0.066035	0.0437935	0.0476667	0.0369853	0.0234679	0.0112362	0.0305166
	1475	0.0662186	0.043886	0.0477102	0.0369887	0.0234545	0.0112432	0.0305776
	1474	0.0661083	0.043924	0.0477176	0.0369968	0.0234642	0.0112471	0.0305605
	1473	0.0660701	0.0440447	0.0477298	0.0370113	0.0234596	0.0112283	0.0305465
	1472	0.0660249	0.044047	0.0477596	0.037003	0.0234365	0.0112285	0.030465
	1471	0.0658916	0.0440729	0.0477619	0.0369972	0.0234049	0.0112205	0.0304298
	1470	0.0660144	0.0441114	0.0477773	0.0370174	0.0233899	0.0112229	0.030451
	1469	0.0661309	0.0441551	0.0478444	0.0370432	0.0233955	0.0112427	0.0304425
	1468	0.0663331	0.0442048	0.0478562	0.0369994	0.0233965	0.0112446	0.0305582
	1467	0.0665033	0.0441992	0.047903	0.0370176	0.0233826	0.011244	0.0305337
	1466	0.0665111	0.0442294	0.0479044	0.0370104	0.0233468	0.0112357	0.0304576
	1465	0.0665071	0.0442611	0.0478447	0.0370402	0.023318	0.0112343	0.0304116
	1464	0.0664855	0.0443194	0.0479183	0.0370603	0.0233271	0.0112332	0.030358
	1463	0.0665061	0.0443561	0.0479288	0.0370504	0.0232977	0.0112647	0.0303593
	1462	0.0665429	0.0443811	0.0479516	0.0370559	0.0232679	0.0112502	0.0303649
	1461	0.0665277	0.04446	0.0479436	0.0370277	0.0232347	0.011275	0.0304404
	1460	0.066414	0.044465	0.0480009	0.0369953	0.0232297	0.0112618	0.0304194
	1459	0.0664075	0.0445111	0.0480147	0.0370144	0.0232223	0.0112627	0.0304092
	1458	0.0663447	0.0445805	0.0480105	0.0370416	0.0232279	0.0112426	0.0303295
	1457	0.0662879	0.0446437	0.0479885	0.0370785	0.0232233	0.0112328	0.0302475
	1456	0.0663931	0.0447042	0.0480264	0.0370997	0.023189	0.0112462	0.0302101
	1455	0.0663543	0.0447223	0.0480885	0.0371007	0.0231957	0.0112603	0.0302294
	1454	0.0662603	0.0447645	0.0480841	0.0371276	0.0231534	0.0112844	0.0302276
	1453	0.0662691	0.0447819	0.0480696	0.037103	0.0231336	0.0112667	0.0302607
	1452	0.0661614	0.044831	0.0481223	0.037102	0.0231396	0.0112703	0.030285
	1451	0.0661117	0.0448565	0.0481999	0.0371046	0.0231349	0.0112659	0.0302522
	1450	0.0660162	0.0449328	0.0482497	0.0371077	0.0231381	0.0112731	0.0302252
	1449	0.0658987	0.0449794	0.0482344	0.0371105	0.0231409	0.0112666	0.0301317
	1448	0.0658399	0.0449972	0.0482584	0.0371136	0.0231328	0.0112725	0.0301173
	1447	0.0656785	0.0450408	0.0482864	0.0371686	0.0231478	0.0112944	0.0300732
	1446	0.0656579	0.0450806	0.0482544	0.0371796	0.0231117	0.0112947	0.0300721
	1445	0.0656663	0.0451798	0.0482904	0.0371776	0.0230596	0.011306	0.0300707
	1444	0.0655259	0.0452455	0.0483396	0.0371613	0.0230542	0.011292	0.0300626
	1443	0.0654844	0.0452542	0.0483629	0.0371532	0.0230048	0.0113085	0.0300427
	1442	0.0653323	0.0452446	0.0483513	0.0371682	0.0230032	0.0113237	0.0300285
	1441	0.0651082	0.0452682	0.0483767	0.0371968	0.022966	0.011365	0.029984
	1440	0.0649915	0.0453181	0.0483794	0.0372232	0.0229836	0.0113759	0.0299279
	1439	0.0648442	0.0453979	0.0484019	0.0372505	0.0229882	0.0113879	0.0298574
	1438	0.0647963	0.0454396	0.048452	0.0372993	0.0230186	0.0113945	0.0298498
	1437	0.0647637	0.0455495	0.0485082	0.0373173	0.0230164	0.0114254	0.0298548
	1436	0.0646838	0.0455825	0.0485439	0.0373448	0.0229836	0.0114366	0.0298322
	1435	0.0645996	0.0456297	0.0485883	0.0373766	0.0229634	0.0114594	0.0299655
	1434	0.0645026	0.0456581	0.0486272	0.0373995	0.0229602	0.0114612	0.0299428
	1433	0.0643295	0.0457294	0.0486665	0.0374558	0.0229716	0.0114998	0.0299564
	1432	0.0641308	0.0457686	0.0486968	0.0374857	0.022975	0.0115338	0.0299641
	1431	0.0639096	0.0458094	0.0487312	0.0375184	0.0229845	0.0115444	0.0298852
	1430	0.0636857	0.0458726	0.0487625	0.0375146	0.0229641	0.0115718	0.029923
	1429	0.0635216	0.0459762	0.0488155	0.0375283	0.0229443	0.0115904	0.0299459
	1428	0.0635461	0.0460583	0.0487972	0.0375555	0.0229557	0.011616	0.0299905
	1427	0.0634814	0.0461042	0.0489193	0.0376285	0.0229772	0.0116717	0.0299566
	1426	0.0633667	0.0461336	0.0489062	0.0376478	0.0229925	0.011708	0.0300007
	1425	0.0632905	0.0461589	0.0489585	0.03764	0.0230028	0.0117698	0.0299905
	1424	0.0630691	0.0462368	0.0490408	0.0377137	0.023027	0.0118021	0.029988
	1423	0.0629765	0.0463053	0.0491169	0.0377433	0.0230274	0.0118429	0.0300566
	1422	0.0627839	0.0463995	0.0492436	0.0378352	0.0230368	0.0118696	0.0300286
	1421	0.0627053	0.0464557	0.0493075	0.0378447	0.0230718	0.0119041	0.0301123
	1420	0.0625706	0.0465576	0.0493806	0.0379389	0.023094	0.0119727	0.0301935
	1419	0.062377	0.0465852	0.0494841	0.0379844	0.0231615	0.0120318	0.0301574
	1418	0.0624176	0.0466437	0.0495647	0.0380736	0.0231713	0.0121032	0.0302133
	1417	0.0622664	0.0467482	0.0496389	0.0381491	0.0232095	0.0121583	0.030155
	1416	0.062191	0.0468062	0.0496996	0.0382703	0.0232301	0.0122191	0.0301534
	1415	0.062127	0.0469306	0.0497535	0.0383923	0.0232801	0.0122861	0.030238
	1414	0.0618912	0.0469971	0.0498806	0.0384829	0.0233335	0.0123937	0.0303068
	1413	0.0619129	0.0471302	0.0499638	0.0385253	0.0234152	0.0124986	0.0304486
	1412	0.0618804	0.047272	0.050041	0.0386068	0.0235064	0.0126041	0.0305131
	1411	0.0618366	0.0473903	0.0501742	0.0387324	0.0235979	0.0126837	0.0306755
	1410	0.0618736	0.0475049	0.0502885	0.0388774	0.0236818	0.0127907	0.0307955
	1409	0.0618173	0.047612	0.0504625	0.0390379	0.0237706	0.0129112	0.0308693
	1408	0.0617552	0.0477463	0.0505984	0.0391829	0.0238794	0.0130684	0.0309868
	1407	0.0617775	0.0478845	0.0508018	0.0393174	0.0239549	0.0132088	0.0310003
	1406	0.0618562	0.0480715	0.0509804	0.039462	0.0240484	0.013352	0.0310978
	1405	0.0618755	0.0482364	0.0511511	0.0396487	0.0241647	0.0134799	0.0312123
	1404	0.0619701	0.0484394	0.0513348	0.0398488	0.0242865	0.0136307	0.0313464
	1403	0.0620226	0.0486337	0.0514965	0.0400553	0.0244045	0.013808	0.0315468
	1402	0.0620486	0.0487605	0.0516783	0.0402394	0.0245199	0.0140301	0.0317219
	1401	0.0620835	0.048923	0.0518414	0.0404312	0.0246708	0.0142258	0.0319022
	1400	0.0620991	0.0491092	0.0520188	0.0406118	0.0248131	0.0144008	0.0320583
	1399	0.0621684	0.0493119	0.0521799	0.0407874	0.0249542	0.0145611	0.0322516
	1398	0.0623001	0.0494881	0.052426	0.0410213	0.0251139	0.014718	0.0324247
	1397	0.0623779	0.0496832	0.0525925	0.041221	0.0252399	0.0149189	0.032602
	1396	0.0624614	0.0498379	0.0527805	0.0414201	0.0253617	0.0150898	0.0327891
	1395	0.0624978	0.0500461	0.0529272	0.0415972	0.0254561	0.0152537	0.0328436
	1394	0.0625089	0.0501554	0.0530843	0.0417305	0.0255099	0.0153924	0.032951
	1393	0.0625376	0.0502916	0.0532383	0.0418929	0.0255869	0.0155171	0.0330526
	1392	0.0626584	0.0504283	0.0533177	0.042024	0.025641	0.0155933	0.0331175
	1391	0.0626885	0.0505182	0.0534095	0.0421228	0.0256948	0.0156761	0.0332584
	1390	0.0626774	0.0506034	0.0534455	0.0421694	0.0257186	0.0157196	0.0332863
	1389	0.0626125	0.0506678	0.0535024	0.0422298	0.0257366	0.0157441	0.0332673
	1388	0.062473	0.0507344	0.0535655	0.0422108	0.0257343	0.0156952	0.0332484
	1387	0.0624707	0.05076	0.0535581	0.0421838	0.0256454	0.0156361	0.0331261
	1386	0.0624107	0.0507542	0.0534754	0.0420985	0.025581	0.0155635	0.0329987
	1385	0.0623916	0.0506634	0.0534071	0.0420286	0.0254955	0.0154468	0.0329412
	1384	0.0622273	0.0505792	0.0533532	0.0418547	0.0253393	0.0152866	0.0327678
	1383	0.0620128	0.0504316	0.0532174	0.041702	0.0251829	0.0151342	0.0326433
	1382	0.0617044	0.0503158	0.053126	0.0415273	0.0249823	0.0149358	0.0325173
	1381	0.0613289	0.0501921	0.0529236	0.0413485	0.0248202	0.0147118	0.0322027
	1380	0.0610907	0.0500508	0.0527772	0.0410914	0.0246002	0.0144544	0.0319706
	1379	0.0609163	0.0498615	0.0525865	0.0408008	0.024371	0.0142143	0.0316901
	1378	0.0606832	0.0496598	0.0524032	0.0404903	0.0241205	0.0139415	0.0313381
	1377	0.0604985	0.0494701	0.0521443	0.0401609	0.0238798	0.0137001	0.0310805
	1376	0.0602088	0.0492048	0.0519072	0.039868	0.0236564	0.0134329	0.0308079
	1375	0.0598029	0.0489702	0.0517173	0.0395644	0.0234229	0.0131502	0.0305189
	1374	0.0595929	0.0487315	0.0515479	0.0392715	0.0232095	0.012866	0.0302721
	1373	0.0593578	0.0485328	0.05133	0.0389462	0.0229635	0.0125854	0.0299803
	1372	0.0592058	0.0483707	0.0510622	0.0386522	0.0227521	0.0123554	0.0296795
	1371	0.0590118	0.0481693	0.0508365	0.0383951	0.0225341	0.0121415	0.0294282
	1370	0.0587886	0.0480096	0.0506536	0.0381197	0.0223173	0.0119147	0.0291353
	1369	0.0585403	0.0478581	0.0504599	0.0378975	0.0221311	0.0117174	0.0288666
	1368	0.0583861	0.0477394	0.0503194	0.0376498	0.0219264	0.0115139	0.0286307
	1367	0.0582563	0.0476387	0.050157	0.0374769	0.021815	0.0113602	0.0284011
	1366	0.0581792	0.0475704	0.0500506	0.0373077	0.0216638	0.0111976	0.0282785
	1365	0.0581585	0.0475048	0.0498881	0.0371554	0.0215374	0.0110654	0.0281765
	1364	0.0579518	0.0474651	0.049792	0.0370389	0.0214189	0.0109446	0.0280103
	1363	0.0579031	0.0474179	0.0497088	0.0369012	0.0213049	0.0108601	0.0278912
	1362	0.0579047	0.0474044	0.0496734	0.0367854	0.0211739	0.010758	0.027747
	1361	0.0578155	0.0473454	0.0496111	0.0366898	0.0210852	0.0106612	0.0276036
	1360	0.0578691	0.047309	0.0495835	0.0366304	0.0210069	0.0105772	0.0275036
	1359	0.0578344	0.0472653	0.0495639	0.0365589	0.0209398	0.0105302	0.0273847
	1358	0.0577578	0.0472885	0.0495366	0.0364928	0.0208726	0.0104685	0.027287
	1357	0.0577976	0.0473028	0.0495586	0.0364175	0.0208265	0.010421	0.0272274
	1356	0.0577534	0.047354	0.0495636	0.0363541	0.0207689	0.0103808	0.0271536
	1355	0.0578198	0.0473538	0.0495884	0.0363093	0.0207047	0.0103704	0.0271086
	1354	0.0578422	0.0473231	0.0495951	0.0362909	0.0206709	0.0103324	0.0270271
	1353	0.0578768	0.0473338	0.0495938	0.0363007	0.0206489	0.0103129	0.0269633
	1352	0.057917	0.0473703	0.0496152	0.036299	0.0206509	0.0102882	0.0269221
	1351	0.0579179	0.0474144	0.0496195	0.0362767	0.0206163	0.0102658	0.0268643
	1350	0.0578954	0.0474438	0.0496287	0.0362594	0.0206128	0.0102378	0.0268043
	1349	0.0579296	0.0474637	0.0496428	0.0362461	0.0205636	0.0102206	0.0267305
	1348	0.0580217	0.0475239	0.0496181	0.0362344	0.0205244	0.0102075	0.0267219
	1347	0.0580419	0.0475819	0.0496065	0.0362192	0.0204791	0.0101863	0.0266913
	1346	0.0580929	0.0476279	0.0496316	0.0361675	0.0204434	0.0101771	0.0266966
	1345	0.0580708	0.0476591	0.0496658	0.0361598	0.0204397	0.0101569	0.0267624
	1344	0.0580449	0.0476881	0.0497183	0.0361806	0.020417	0.0101562	0.0267295
	1343	0.0580206	0.0476948	0.049775	0.0361875	0.0204001	0.0101336	0.0266923
	1342	0.0580652	0.0477517	0.0497825	0.03616	0.0203734	0.010119	0.026683
	1341	0.0581393	0.0477944	0.0497895	0.0361398	0.0203346	0.0100933	0.0266236
	1340	0.0581631	0.0478289	0.0497708	0.0361183	0.0203074	0.0100697	0.0265668
	1339	0.0582466	0.047873	0.0497334	0.0361113	0.0203101	0.0100326	0.0265801
	1338	0.0582642	0.0479204	0.0497343	0.0361056	0.0202705	0.0100182	0.0265121
	1337	0.0582527	0.0479582	0.0498001	0.0360959	0.0202396	0.0100156	0.0264697
	1336	0.0582849	0.0479726	0.0498511	0.0361041	0.0201944	0.00998607	0.0264998
	1335	0.0583375	0.0480152	0.0499069	0.0360933	0.0201788	0.00997867	0.0264209
	1334	0.0584375	0.0480692	0.0498909	0.0360718	0.0201457	0.00995248	0.0264452
	1333	0.0585049	0.0481737	0.0499119	0.0360417	0.0201123	0.00995018	0.0263974
	1332	0.058558	0.0482164	0.0499497	0.0360166	0.0200819	0.00993284	0.0263281
	1331	0.0585816	0.0482756	0.0499902	0.0359929	0.0200742	0.00992573	0.0263196
	1330	0.0585663	0.0482626	0.050032	0.0360189	0.0200571	0.00991246	0.0262225
	1329	0.0586077	0.0482756	0.0500501	0.0360262	0.0200263	0.00989948	0.0262106
	1328	0.0586338	0.0483306	0.0500778	0.0360356	0.0200052	0.00987932	0.0261783
	1327	0.0586304	0.0483684	0.0500904	0.0360201	0.0199759	0.00986424	0.0261337
	1326	0.0586371	0.0484364	0.0501149	0.0360149	0.0199459	0.00988129	0.0261125
	1325	0.058708	0.0484699	0.0501065	0.0359823	0.019918	0.00986845	0.0260764
	1324	0.058763	0.048531	0.0501174	0.0359838	0.0198687	0.00986572	0.0260757
	1323	0.0588303	0.0485727	0.0501134	0.036006	0.0198694	0.0098281	0.026031
	1322	0.058882	0.0486174	0.050163	0.0360145	0.0198354	0.0098075	0.0260057
	1321	0.0588707	0.0486526	0.0502228	0.0360325	0.0198371	0.00980094	0.0259948
	1320	0.058854	0.0487323	0.0502572	0.036016	0.0198263	0.00978828	0.0259552
	1319	0.0587631	0.0487582	0.0502921	0.0360208	0.0197785	0.0097751	0.0259173
	1318	0.0588382	0.0488071	0.050314	0.0360068	0.0197748	0.00975011	0.0258799
	1317	0.058882	0.0488631	0.0503642	0.0359912	0.0197482	0.00974254	0.0258327
	1316	0.0589957	0.0489293	0.0504177	0.0360278	0.0197356	0.00974436	0.0258292
	1315	0.0591076	0.0489967	0.0504624	0.0360499	0.0197016	0.00973638	0.0257995
	1314	0.0591261	0.0490775	0.0505136	0.0360733	0.0196676	0.00972437	0.0257601
	1313	0.0591152	0.0491603	0.0505513	0.0360439	0.0196525	0.00970739	0.025686
	1312	0.0591219	0.0491972	0.0505435	0.0360201	0.0196442	0.00969915	0.0255857
	1311	0.0592074	0.0492379	0.0505904	0.0360193	0.0196337	0.0097091	0.0255944
	1310	0.0592219	0.0492486	0.0506051	0.0360219	0.019602	0.00970581	0.0256116
	1309	0.0593011	0.0493339	0.0506906	0.0360564	0.01959	0.00969298	0.025637
	1308	0.059348	0.0493701	0.0507045	0.0360609	0.0195646	0.00968214	0.0256025
	1307	0.0593624	0.0494485	0.0507562	0.0360822	0.0195772	0.00967244	0.0256082
	1306	0.0594836	0.0494894	0.0508227	0.0360814	0.0195578	0.00967065	0.0255703
	1305	0.0595982	0.0495356	0.0508577	0.0360932	0.0195459	0.00968615	0.0254938
	1304	0.0597246	0.0495953	0.0508706	0.0361099	0.0194981	0.00968651	0.0255168
	1303	0.0598368	0.049682	0.0508676	0.0360848	0.0195031	0.00966003	0.0254063
	1302	0.0599082	0.0497785	0.050928	0.036101	0.0194918	0.00963257	0.02539
	1301	0.0598347	0.0498532	0.0509826	0.036106	0.0194861	0.00961422	0.0253797
	1300	0.059707	0.0499243	0.0510475	0.0361517	0.0194714	0.00961547	0.0252932
	1299	0.0597282	0.0499819	0.0511184	0.036156	0.0194352	0.0096229	0.0253036
	1298	0.0597106	0.0500506	0.051157	0.0361322	0.0194161	0.00961377	0.0252938
	1297	0.0598069	0.0501164	0.051194	0.0361285	0.0194225	0.00962223	0.0252467
	1296	0.0599904	0.0501416	0.0512178	0.0361421	0.0194145	0.00961345	0.0252806
	1295	0.0599858	0.0502437	0.0512579	0.0361786	0.0193944	0.00961463	0.0252608
	1294	0.0600035	0.0503083	0.0513052	0.0362061	0.0193656	0.00961349	0.0252184
	1293	0.0601143	0.0503753	0.0513184	0.0362251	0.0193659	0.00960226	0.0252293
	1292	0.0601356	0.0504325	0.0513484	0.0362542	0.0193483	0.00960307	0.0252304
	1291	0.0602425	0.0504847	0.051386	0.0362279	0.0193355	0.00959604	0.0251978
	1290	0.0602624	0.0505844	0.0514076	0.0362438	0.0193328	0.0095943	0.0251453
	1289	0.0602889	0.0506329	0.0514476	0.0362484	0.0192963	0.00957852	0.0251091
	1288	0.0603515	0.050704	0.0514871	0.0362626	0.0192877	0.00956321	0.0250521
	1287	0.0604698	0.050779	0.0515604	0.0362781	0.0192599	0.00955998	0.0250604
	1286	0.0605498	0.0508638	0.0516273	0.0362804	0.0192578	0.00957658	0.0250277
	1285	0.0605971	0.0509335	0.0516808	0.0363106	0.0192479	0.00957745	0.0249877
	1284	0.060613	0.050944	0.0517076	0.0363311	0.0192429	0.00957706	0.0249513
	1283	0.0605867	0.0510435	0.0517114	0.0363768	0.0192106	0.00958219	0.0248902
	1282	0.0606484	0.0511067	0.0517485	0.0363868	0.0191963	0.00956843	0.0248306
	1281	0.0606812	0.0512261	0.0517778	0.0363855	0.0191926	0.00955322	0.0248098
	1280	0.0607283	0.0512888	0.0518648	0.0364065	0.0191873	0.00954921	0.024758
	1279	0.0608047	0.0513468	0.051917	0.0364066	0.0191799	0.00954328	0.0247274
	1278	0.0608767	0.0514208	0.0519803	0.0364226	0.0191678	0.00955104	0.0247528
	1277	0.0608904	0.0514681	0.0520186	0.0364212	0.0191622	0.0095559	0.0247361
	1276	0.0609394	0.0515719	0.0520872	0.0363993	0.0191599	0.00956125	0.0247523
	1275	0.0609617	0.0516197	0.0520907	0.0364312	0.0191619	0.00956369	0.0247194
	1274	0.0610314	0.0516968	0.0521658	0.0364766	0.019149	0.00955155	0.0247053
	1273	0.0611664	0.0517652	0.0521887	0.036547	0.0191431	0.00953985	0.0246909
	1272	0.0612971	0.0518844	0.0522458	0.036539	0.0191472	0.0095404	0.0246452
	1271	0.0614192	0.0519547	0.0523196	0.0365662	0.0191262	0.00953902	0.0246177
	1270	0.0614853	0.0520316	0.052405	0.0365545	0.0190943	0.00956	0.0245759
	1269	0.0615007	0.0520951	0.0524771	0.0365992	0.0190914	0.00955277	0.0245514
	1268	0.0615492	0.0521446	0.0524961	0.0366148	0.0190754	0.00955517	0.0245267
	1267	0.0615545	0.0522495	0.0525793	0.0366554	0.0190894	0.00954271	0.0245343
	1266	0.061645	0.0523303	0.0526002	0.0366679	0.0190801	0.00956086	0.0245339
	1265	0.0617451	0.0524025	0.052662	0.0366987	0.0190797	0.00955351	0.0245245
	1264	0.0618253	0.0524641	0.0526964	0.0366986	0.0190771	0.00956752	0.0244992
	1263	0.0619657	0.05257	0.0527742	0.0367519	0.019072	0.00956494	0.0244865
	1262	0.0620785	0.0526441	0.0528136	0.0367785	0.0190771	0.00956856	0.0244774
	1261	0.0621137	0.0527033	0.0528806	0.0368078	0.0190731	0.00959002	0.0244583
	1260	0.062193	0.052779	0.0529313	0.0368187	0.0190802	0.00958575	0.0244577
	1259	0.0621768	0.0528779	0.0529796	0.0368252	0.0190831	0.00958605	0.024392
	1258	0.0621773	0.0529393	0.0530378	0.0368588	0.0190759	0.00957178	0.0243498
	1257	0.0622781	0.0530495	0.053098	0.0368971	0.0190605	0.00957516	0.0243137
	1256	0.0623355	0.0531085	0.0531375	0.0369517	0.0190413	0.00958456	0.024281
	1255	0.0624435	0.053197	0.0531927	0.036969	0.0190186	0.00959008	0.024267
	1254	0.0625207	0.0533069	0.05323	0.0370065	0.0190089	0.00959428	0.0242649
	1253	0.062586	0.0533719	0.0532739	0.0369904	0.0190114	0.00957927	0.0242548
	1252	0.0626232	0.0534743	0.0533602	0.0370204	0.0189974	0.00956678	0.0242438
	1251	0.0626623	0.0535396	0.0533899	0.0370505	0.0189831	0.00956967	0.0242232
	1250	0.0627201	0.0536422	0.0534873	0.0370851	0.0189558	0.00957136	0.0241954
	1249	0.062766	0.0537107	0.0535263	0.0371084	0.0189583	0.00957441	0.0241464
	1248	0.0628294	0.0537683	0.053572	0.0371111	0.0189384	0.00956493	0.0241086
	1247	0.0629165	0.0538388	0.0536123	0.0371288	0.0189447	0.00956086	0.0241134
	1246	0.0629713	0.0539146	0.0536799	0.0371295	0.0189363	0.00955387	0.0240712
	1245	0.0630393	0.0539557	0.0537433	0.0371603	0.0189092	0.00954187	0.0240624
	1244	0.0631674	0.0540379	0.0537728	0.0371438	0.018899	0.00951078	0.0240568
	1243	0.0631928	0.0540943	0.0538038	0.0371301	0.0188675	0.00949585	0.0240285
	1242	0.0632755	0.0541813	0.0538429	0.0371353	0.0188365	0.00947084	0.0240098
	1241	0.0633319	0.0542298	0.0539058	0.0371329	0.018806	0.00947267	0.0239942
	1240	0.0633544	0.054328	0.0539269	0.0371483	0.0188063	0.00945282	0.0239311
	1239	0.0634773	0.0543662	0.05396	0.0371725	0.018805	0.00943552	0.0239184
	1238	0.0635262	0.0544443	0.0539882	0.0371714	0.0187881	0.0094238	0.0238551
	1237	0.0636095	0.0544832	0.0540347	0.0371975	0.0187784	0.00941449	0.0238007
	1236	0.0636546	0.0545786	0.0540856	0.0372002	0.0187613	0.00939867	0.0237689
	1235	0.0637034	0.0546326	0.054139	0.037199	0.0187467	0.00940432	0.0237212
	1234	0.0637414	0.0547235	0.0541634	0.0371832	0.0187037	0.0093986	0.0236718
	1233	0.0638291	0.0547618	0.0541868	0.0371985	0.018676	0.00939262	0.0236561
	1232	0.0638785	0.0548673	0.0542087	0.0372112	0.0186615	0.00936689	0.0236207
	1231	0.0638994	0.054908	0.0542544	0.0372217	0.0186505	0.00935176	0.0235666
	1230	0.0639405	0.0549842	0.0543241	0.0372381	0.0186481	0.0093301	0.023553
	1229	0.0639733	0.055033	0.0543752	0.0372501	0.0186339	0.00931832	0.0235128
	1228	0.0640047	0.0550832	0.0544227	0.0372612	0.01862	0.00930227	0.0234893
	1227	0.064087	0.0551483	0.0544608	0.0372773	0.0185893	0.00929555	0.0234608
	1226	0.0641706	0.0552134	0.054501	0.0372983	0.0185729	0.00928454	0.0234434
	1225	0.0642392	0.055282	0.0545382	0.0372832	0.0185561	0.00926448	0.0233986
	1224	0.0643457	0.055379	0.0545711	0.0372725	0.0185522	0.00926942	0.023367
	1223	0.0644036	0.0554565	0.054623	0.0372883	0.0185267	0.00925548	0.0233216
	1222	0.0644979	0.0555229	0.0546786	0.0373095	0.0185068	0.00925279	0.0232794
	1221	0.0645933	0.0555943	0.0547057	0.0373243	0.0184988	0.0092364	0.0232462
	1220	0.0646703	0.0556631	0.0547248	0.0373543	0.0184875	0.00922842	0.0232363
	1219	0.0646913	0.0557351	0.0547874	0.0373738	0.0184845	0.00922338	0.0231895
	1218	0.0646971	0.0557807	0.0548394	0.0373843	0.0184727	0.00921309	0.0231627
	1217	0.0647112	0.0558737	0.0548791	0.0373726	0.0184644	0.00920599	0.0231543
	1216	0.0647114	0.0559301	0.054945	0.0373906	0.0184301	0.00920756	0.0231219
	1215	0.0647548	0.05599	0.0549978	0.0374043	0.0184358	0.00919195	0.0231047
	1214	0.0648348	0.0560689	0.0550638	0.0374282	0.0184163	0.00919871	0.0230774
	1213	0.0649037	0.0561463	0.055102	0.0374536	0.0184092	0.00920782	0.0230411
	1212	0.0649745	0.0562063	0.0551219	0.0374671	0.0183817	0.00920536	0.022976
	1211	0.0650944	0.0562526	0.055167	0.0374492	0.0183905	0.00920131	0.0229538
	1210	0.0651497	0.0563234	0.0552221	0.037445	0.0183844	0.00918531	0.0229082
	1209	0.0651602	0.0563852	0.0553031	0.0374498	0.0183767	0.00918066	0.022887
	1208	0.0652182	0.0564825	0.0553367	0.0374491	0.0183631	0.00917467	0.0229014
	1207	0.0652441	0.0565461	0.0553698	0.0374733	0.0183527	0.00916956	0.0229113
	1206	0.0652899	0.05665	0.05542	0.0374897	0.0183517	0.00916685	0.0228899
	1205	0.0653856	0.0567245	0.0554982	0.0374978	0.0183475	0.0091587	0.0228832
	1204	0.0654789	0.0567802	0.055546	0.0375389	0.0183359	0.00916456	0.0228257
	1203	0.0655396	0.0568214	0.0555936	0.0375409	0.018328	0.00915903	0.0227982
	1202	0.0655663	0.056885	0.0556404	0.0375526	0.0183166	0.0091626	0.0228314
	1201	0.0656478	0.056949	0.0556966	0.0375764	0.0183102	0.00915415	0.0227928
	1200	0.0657593	0.057058	0.0557032	0.0376005	0.0183025	0.00915221	0.0227137
	1199	0.065864	0.0571058	0.0557515	0.0376255	0.0182821	0.00914382	0.0226958
	1198	0.0658738	0.0571347	0.0558015	0.0376191	0.0182714	0.00913944	0.0227201
	1197	0.065945	0.0572054	0.0558553	0.0376161	0.018257	0.00914411	0.0226879
	1196	0.0660788	0.057285	0.0558889	0.0376138	0.0182542	0.009147	0.0226897
	1195	0.0660815	0.0573726	0.0559288	0.0376441	0.0182453	0.00913845	0.0226255
	1194	0.0661229	0.0574345	0.0559487	0.0376623	0.0182347	0.00913633	0.0225928
	1193	0.0662136	0.0574869	0.0559947	0.0376848	0.0182361	0.0091259	0.0225976
	1192	0.0662229	0.0575555	0.0560369	0.0376963	0.0182268	0.00913386	0.022585
	1191	0.066326	0.0576289	0.0560815	0.0377103	0.0182122	0.00913041	0.0226061
	1190	0.0664036	0.0577094	0.0561024	0.0377632	0.0181918	0.00913008	0.022554
	1189	0.0664519	0.0578017	0.0561394	0.0377811	0.0181852	0.00911799	0.022507
	1188	0.0664811	0.0578712	0.0561932	0.0378054	0.0181819	0.00910349	0.0224326
	1187	0.0664635	0.0579282	0.05623	0.0378235	0.0181736	0.00910991	0.0223622
	1186	0.0665201	0.0579837	0.0562668	0.037827	0.0181523	0.00910694	0.0223321
	1185	0.0665546	0.0580454	0.0563079	0.0378515	0.0181329	0.00910056	0.0222818
	1184	0.0666301	0.0580974	0.0563351	0.0378437	0.0181252	0.00907983	0.0222906
	1183	0.0667624	0.0581835	0.0563715	0.0378652	0.0180952	0.00907272	0.02227
	1182	0.0667754	0.0582534	0.0564427	0.0378595	0.0180843	0.00907528	0.0222386
	1181	0.0668923	0.0583463	0.0564875	0.0378512	0.0180655	0.00908495	0.0222323
	1180	0.0669226	0.0584122	0.0565432	0.0378573	0.0180632	0.00907087	0.0221916
	1179	0.0669789	0.0584943	0.0565688	0.0378715	0.01805	0.00906876	0.0221466
	1178	0.0670594	0.0585732	0.0566148	0.0378634	0.0180416	0.00904475	0.0221028
	1177	0.0670182	0.0585798	0.0566317	0.0378689	0.0180281	0.00902956	0.0220678
	1176	0.0671133	0.0586198	0.0566673	0.0378725	0.0180211	0.00903543	0.0220326
	1175	0.0671027	0.0586358	0.0567169	0.0378973	0.018017	0.00904667	0.022013
	1174	0.0671151	0.0587246	0.0567537	0.0379428	0.0180023	0.00903148	0.0219818
	1173	0.0672346	0.0588064	0.0568116	0.0379444	0.0180048	0.00901832	0.0219635
	1172	0.0672534	0.0588773	0.0568545	0.0379954	0.0179836	0.00901615	0.0219406
	1171	0.0673349	0.0589272	0.0568943	0.0379931	0.0179702	0.00901097	0.0219316
	1170	0.0673766	0.0589836	0.0569493	0.0379622	0.0179456	0.00901252	0.0219136
	1169	0.0673687	0.0590666	0.0569563	0.0379642	0.0179304	0.0090008	0.0218659
	1168	0.0673567	0.0590978	0.0570257	0.0379806	0.0179215	0.00899716	0.0218603
	1167	0.0673496	0.0591663	0.0570308	0.0380062	0.0179358	0.00899361	0.0218042
	1166	0.0673628	0.0591903	0.0570458	0.0380006	0.0179369	0.00900601	0.021748
	1165	0.0674054	0.0592631	0.0570639	0.0380062	0.017928	0.00901194	0.0217203
	1164	0.067539	0.0593075	0.0571309	0.0379992	0.0179073	0.00900428	0.0216685
	1163	0.0675467	0.059337	0.0571727	0.038011	0.0178859	0.00900053	0.0216414
	1162	0.0676633	0.0594484	0.0572513	0.0380232	0.0178827	0.00898822	0.0216555
	1161	0.06774	0.0595135	0.0572419	0.0380301	0.0178434	0.0089869	0.0216444
	1160	0.0677315	0.0595986	0.0572856	0.0380483	0.0178462	0.00898154	0.0216445
	1159	0.0678238	0.0596012	0.0573114	0.0380746	0.0178365	0.00898094	0.0216535
	1158	0.0678489	0.0596165	0.0573552	0.0380749	0.0178424	0.00897454	0.021637
	1157	0.0678249	0.0596371	0.0573549	0.0380657	0.01782	0.0089713	0.0215975
	1156	0.0678461	0.0597097	0.0573801	0.0380143	0.017799	0.00896233	0.0215334
	1155	0.067846	0.0597544	0.0574149	0.0380197	0.0177979	0.00894977	0.0214965
	1154	0.0678091	0.0598199	0.0574277	0.0380494	0.0178029	0.00894964	0.0214604
	1153	0.0679044	0.0598565	0.0574501	0.038057	0.0177862	0.00894247	0.0214517
	1152	0.0679143	0.0599049	0.0574824	0.038053	0.0177758	0.00893877	0.0214247
	1151	0.0679188	0.0599331	0.0575302	0.0380694	0.0177377	0.00893435	0.0213763
	1150	0.0679784	0.0599511	0.0575226	0.0380743	0.0177383	0.00892523	0.0213595
	1149	0.0679714	0.0599918	0.0575858	0.0380912	0.0177221	0.00891244	0.0213377
	1148	0.06792	0.0600292	0.0575675	0.0380655	0.0177045	0.00889707	0.0213256
	1147	0.0679901	0.0600178	0.0576157	0.0380603	0.017689	0.00888787	0.0213301
	1146	0.0680292	0.060094	0.0576248	0.038046	0.0176667	0.00889076	0.0213154
	1145	0.067977	0.0601311	0.0576583	0.0380443	0.0176639	0.00889667	0.0212841
	1144	0.0681139	0.0601936	0.0576571	0.0380336	0.017669	0.00889241	0.0212933
	1143	0.0681017	0.0601717	0.0577049	0.0380653	0.0176555	0.00887964	0.0212671
	1142	0.0681175	0.0602029	0.0577174	0.0380376	0.017634	0.0088689	0.0212375
	1141	0.0681948	0.0602294	0.0577382	0.0380323	0.0176133	0.0088641	0.0212402
	1140	0.0681783	0.0602621	0.057718	0.0379734	0.0175949	0.00886379	0.0212047
	1139	0.0681788	0.0602692	0.0577195	0.0379685	0.0175972	0.00885242	0.0211569
	1138	0.0681468	0.0602926	0.0577083	0.037977	0.0175683	0.00884291	0.0211142
	1137	0.0681356	0.0603182	0.0577271	0.0380137	0.0175624	0.00883028	0.0210649
	1136	0.0681579	0.0603498	0.0577426	0.0379928	0.0175352	0.00883452	0.0210532
	1135	0.0681494	0.0603675	0.0577401	0.0379716	0.0175233	0.00883314	0.0210617
	1134	0.0681748	0.0603697	0.0577265	0.0379386	0.0175012	0.0088376	0.0210437
	1133	0.0682258	0.0603677	0.0577212	0.0379363	0.0174833	0.0088358	0.0210213
	1132	0.0681891	0.0603673	0.0576921	0.0379419	0.0174543	0.00881659	0.0209752
	1131	0.0682399	0.0603778	0.0577289	0.0379438	0.0174292	0.00880533	0.0209327
	1130	0.0682019	0.0604129	0.0577333	0.037948	0.0174092	0.00877906	0.0209024
	1129	0.0681163	0.0604047	0.0577531	0.0379444	0.0174067	0.00877152	0.02088
	1128	0.0681732	0.0604091	0.0577402	0.0379149	0.0174067	0.00875541	0.0208735
	1127	0.0681508	0.0603611	0.0577368	0.0379078	0.0173759	0.00875433	0.0208738
	1126	0.0681505	0.0603664	0.0577147	0.037867	0.0173666	0.00875457	0.0208326
	1125	0.0680711	0.0603697	0.0576898	0.0378668	0.0173607	0.008761	0.0207781
	1124	0.0679885	0.06037	0.0576746	0.0378325	0.0173492	0.0087577	0.0207198
	1123	0.0678973	0.0603916	0.0576681	0.0377797	0.0173309	0.00874983	0.0206702
	1122	0.067918	0.060389	0.0576397	0.0377564	0.017314	0.00874471	0.0206513
	1121	0.0679972	0.0603787	0.0576297	0.0377276	0.017291	0.00872559	0.020631
	1120	0.0679621	0.0603637	0.0576034	0.0377228	0.0172797	0.00872152	0.0206097
	1119	0.0679547	0.0603336	0.0576008	0.0377089	0.0172662	0.00870816	0.0205814
	1118	0.067896	0.0602796	0.0575547	0.0376914	0.0172407	0.00870431	0.0205748
	1117	0.0678409	0.0602463	0.0575344	0.0376548	0.0172116	0.00870215	0.0205974
	1116	0.0677614	0.060198	0.0575193	0.037631	0.0171868	0.00868874	0.0205852
	1115	0.0677503	0.0602157	0.05751	0.0376202	0.0171504	0.00869281	0.0205651
	1114	0.0677222	0.0601854	0.0574569	0.0376045	0.0171363	0.0086655	0.020547
	1113	0.0676393	0.0601888	0.0574188	0.0375777	0.0171335	0.00865323	0.0204871
	1112	0.0676356	0.0601373	0.0574221	0.0375467	0.0171055	0.00864232	0.0204702
	1111	0.0675646	0.0601217	0.0574026	0.0374949	0.0170947	0.00865865	0.020433
	1110	0.0675357	0.0600805	0.0574019	0.0374757	0.0170697	0.0086439	0.0204143
	1109	0.0675828	0.0600651	0.0573363	0.0374296	0.0170436	0.00864325	0.0204359
	1108	0.067534	0.0600537	0.0573074	0.0374203	0.017036	0.0086326	0.0204011
	1107	0.0674863	0.0600074	0.0572354	0.0374041	0.017019	0.00863717	0.0203912
	1106	0.0674083	0.0599569	0.0571935	0.0373854	0.0169873	0.00863038	0.0203808
	1105	0.0672403	0.0599268	0.0571542	0.0373368	0.0169586	0.00860939	0.0203074
	1104	0.0672244	0.059906	0.0570959	0.0373153	0.0169311	0.00859598	0.0202898
	1103	0.0672211	0.0598647	0.0570321	0.0372894	0.0169249	0.00857803	0.0202613
	1102	0.0671489	0.059828	0.0569951	0.0372531	0.016907	0.00856882	0.0201765
	1101	0.0671211	0.0597933	0.056955	0.0372009	0.0168861	0.00855659	0.0201701
	1100	0.0670633	0.059689	0.0569105	0.0371539	0.0168477	0.00855307	0.0201409
	1099	0.0669497	0.0596288	0.0568527	0.0371369	0.0168237	0.00854991	0.0201365
	1098	0.0669339	0.0595793	0.0568181	0.0371253	0.0167913	0.00853956	0.0201241
	1097	0.0668994	0.0595521	0.056769	0.0370839	0.016773	0.00852475	0.0200919
	1096	0.0668634	0.0594976	0.056715	0.0370546	0.0167647	0.00852103	0.0201007
	1095	0.066861	0.0594528	0.0566851	0.0370124	0.016729	0.00852013	0.0200647
	1094	0.0667103	0.0593781	0.0566395	0.036955	0.0167034	0.00851253	0.0200466
	1093	0.066615	0.0593009	0.0565952	0.03693	0.0166747	0.00851164	0.0200193
	1092	0.0664996	0.05921	0.0565583	0.036892	0.0166547	0.00849791	0.019972
	1091	0.0663676	0.0591294	0.0564851	0.0368647	0.0166486	0.00849757	0.0199481
	1090	0.0663251	0.0590718	0.0564299	0.0368222	0.0166221	0.0084828	0.0199352
	1089	0.0662305	0.0590082	0.0563579	0.0367943	0.0165972	0.00846784	0.0199139
	1088	0.066158	0.0589402	0.0562948	0.0367229	0.0165732	0.0084606	0.019895
	1087	0.0660752	0.0588341	0.0562149	0.036674	0.0165419	0.0084638	0.0198654
	1086	0.0659823	0.0587433	0.0561426	0.0366049	0.0165234	0.00846641	0.0198297
	1085	0.0659227	0.0586746	0.0560488	0.0365382	0.0164941	0.00844401	0.0198079
	1084	0.065786	0.0586081	0.0559748	0.0364949	0.0164542	0.008428	0.0197558
	1083	0.0656964	0.0585195	0.0558675	0.0364682	0.0164138	0.00840702	0.0197353
	1082	0.0655995	0.0584224	0.0558175	0.0364212	0.0163851	0.00840754	0.0197287
	1081	0.0654993	0.0583471	0.0557503	0.0363625	0.016363	0.00839186	0.0196968
	1080	0.0653865	0.0582625	0.0556889	0.0362948	0.0163531	0.00839306	0.0196442
	1079	0.0652687	0.0582003	0.0555964	0.0362539	0.0163264	0.00837749	0.01964
	1078	0.0651625	0.0581065	0.0555162	0.0362146	0.0163056	0.0083777	0.0196016
	1077	0.0650636	0.05798	0.0554248	0.0361632	0.01626	0.00836619	0.0195638
	1076	0.0649776	0.0578728	0.0553376	0.0361179	0.0162341	0.00835762	0.0195725
	1075	0.0649137	0.0577583	0.0552715	0.0360544	0.01621	0.00834619	0.0195447
	1074	0.0647827	0.0577198	0.0551926	0.0359999	0.0161711	0.00833106	0.0195189
	1073	0.0646862	0.0576041	0.0551412	0.0359321	0.0161522	0.00831993	0.0195177
	1072	0.0646189	0.0575198	0.0550565	0.0358739	0.0161211	0.00830802	0.0195076
	1071	0.0644903	0.0574148	0.0549352	0.0358055	0.0161015	0.0083057	0.0194534
	1070	0.0644341	0.0573114	0.0548439	0.0357462	0.0160665	0.00828365	0.0194287
	1069	0.0643224	0.0571896	0.0547258	0.0356848	0.0160391	0.00828032	0.0193877
	1068	0.0642106	0.0570843	0.0546591	0.0356416	0.0160076	0.00826738	0.0193863
	1067	0.0640741	0.0569618	0.0545451	0.0355727	0.0159855	0.00826212	0.0193781
	1066	0.0639572	0.0568431	0.0544765	0.0355128	0.015957	0.00825011	0.0193512
	1065	0.0638033	0.0567102	0.054364	0.0354482	0.0159153	0.00823546	0.0193195
	1064	0.0636478	0.0566371	0.054294	0.0353878	0.0158825	0.00822615	0.0192678
	1063	0.0635621	0.056501	0.054156	0.0353228	0.0158582	0.00820384	0.0192405
	1062	0.0634445	0.0563946	0.0540549	0.0352561	0.0158379	0.00818792	0.0192003
	1061	0.0633145	0.0562493	0.0539265	0.035223	0.0158087	0.00818105	0.019164
	1060	0.0631983	0.0561322	0.05385	0.035168	0.0157735	0.00817336	0.0191855
	1059	0.0630698	0.0560219	0.0537626	0.0351199	0.0157296	0.00816839	0.0191681
	1058	0.0629114	0.0559209	0.0536931	0.0350403	0.0157047	0.0081607	0.0191741
	1057	0.0628541	0.0558326	0.0535987	0.0350096	0.0156687	0.00814347	0.0191775
	1056	0.0627884	0.0557155	0.0534898	0.0349564	0.0156409	0.00813633	0.0191231
	1055	0.0626628	0.0555726	0.0533583	0.0348945	0.015619	0.00811976	0.0190773
	1054	0.0625509	0.0554155	0.0532421	0.0348201	0.0155807	0.00811089	0.0190557
	1053	0.0623591	0.0553	0.0531308	0.0347585	0.015558	0.00810392	0.0190273
	1052	0.0621536	0.0551689	0.053033	0.0346939	0.0155312	0.00810459	0.0189566
	1051	0.0620414	0.0550801	0.0529342	0.0346263	0.0154996	0.00809997	0.0189442
	1050	0.0619469	0.0549522	0.0528444	0.0345522	0.0154661	0.0080692	0.0189413
	1049	0.0618468	0.0548027	0.0527655	0.034492	0.0154279	0.00805392	0.0189115
	1048	0.0617108	0.0546845	0.0526419	0.0344315	0.0154002	0.00803734	0.0188922
	1047	0.0615643	0.0545654	0.0525468	0.0343686	0.015377	0.00803189	0.0188489
	1046	0.0614543	0.0544376	0.0524285	0.0343074	0.0153463	0.00802452	0.0188036
	1045	0.0613261	0.0543144	0.0523251	0.0342353	0.0153072	0.008015	0.0187901
	1044	0.0612126	0.0542019	0.0521972	0.0341784	0.0152836	0.00801369	0.0187858
	1043	0.0610491	0.0540602	0.0521129	0.0341083	0.0152538	0.00800543	0.0187669
	1042	0.0608466	0.0539427	0.0520229	0.0340382	0.015229	0.00800142	0.0187427
	1041	0.0607442	0.0537815	0.0519619	0.0339894	0.0151952	0.00798236	0.0187185
	1040	0.0606409	0.0536406	0.0518135	0.0339341	0.0151606	0.00796772	0.0186988
	1039	0.0605873	0.0535094	0.0517023	0.0338629	0.015129	0.00794669	0.0186898
	1038	0.060462	0.0534007	0.0515712	0.0337948	0.0151022	0.00793388	0.0186361
	1037	0.0603021	0.0532711	0.0515067	0.0337419	0.0150768	0.00792654	0.0186259
	1036	0.0601564	0.0531632	0.0514062	0.033668	0.0150347	0.00791886	0.0185968
	1035	0.0599986	0.0530548	0.051262	0.0336008	0.0150032	0.00790657	0.0185622
	1034	0.0599021	0.0529482	0.0511443	0.0335616	0.0149858	0.0078961	0.0185766
	1033	0.0597384	0.0528223	0.0510218	0.0334853	0.0149607	0.00788482	0.0185326
	1032	0.0596733	0.0526589	0.0509232	0.033444	0.014927	0.00787988	0.0185214
	1031	0.0594933	0.0525339	0.0508438	0.0333748	0.0148831	0.00787881	0.0185028
	1030	0.0593772	0.0523813	0.0507559	0.0333108	0.0148622	0.00786499	0.0184714
	1029	0.0592663	0.0522814	0.0506588	0.0332323	0.0148404	0.00786163	0.018449
	1028	0.0590896	0.0521556	0.0505756	0.0331486	0.0148308	0.00784702	0.0184305
	1027	0.0589692	0.0520435	0.0504241	0.0330806	0.0147945	0.00784212	0.0183731
	1026	0.0588516	0.0519063	0.0503374	0.0330363	0.0147671	0.00782105	0.018348
	1025	0.0587018	0.051775	0.0502159	0.0329776	0.0147405	0.00781028	0.0183149
	1024	0.058554	0.0516466	0.0500961	0.0329479	0.0147179	0.00779492	0.0182619
	1023	0.0583994	0.0515495	0.0500076	0.0328877	0.0146853	0.0077864	0.0182677
	1022	0.0582376	0.0514331	0.049919	0.0328369	0.0146467	0.00777737	0.0182416
	1021	0.0581318	0.0513301	0.0498175	0.0327613	0.0146006	0.00775645	0.0182375
	1020	0.0580463	0.0511823	0.0497122	0.0326987	0.0145705	0.00773359	0.0182298
	1019	0.0580235	0.0510699	0.0496014	0.0326627	0.0145452	0.00773143	0.0182056
	1018	0.0579512	0.0509548	0.0495064	0.0325914	0.014518	0.00772574	0.0181797
	1017	0.0578343	0.0508333	0.0494217	0.0325457	0.0144963	0.00772465	0.0181613
	1016	0.0576887	0.0506994	0.049302	0.0324883	0.0144496	0.00771644	0.0181262
	1015	0.0575376	0.0505704	0.0491574	0.0324322	0.014425	0.00770743	0.0180939
	1014	0.0573327	0.0504701	0.0490416	0.032377	0.0144049	0.00769276	0.0180513
	1013	0.0572501	0.0503484	0.0489463	0.032313	0.0143849	0.00767984	0.0180022
	1012	0.057132	0.0502287	0.0488744	0.0322618	0.0143563	0.00766808	0.0179557
	1011	0.0569753	0.0501399	0.0487777	0.0321931	0.0143088	0.0076542	0.0179378
	1010	0.0569671	0.0499817	0.0486967	0.0321529	0.014282	0.00764814	0.0179243
	1009	0.0568921	0.0498634	0.0485959	0.032107	0.0142527	0.00764138	0.0179197
	1008	0.0568181	0.0497744	0.0484969	0.0320441	0.0142391	0.00762702	0.0179388
	1007	0.0567188	0.0496842	0.0484081	0.0319872	0.0142097	0.00761272	0.0179207
	1006	0.056562	0.049597	0.0482879	0.0319377	0.0141885	0.00760535	0.017884
	1005	0.0564278	0.0494719	0.048196	0.031872	0.0141528	0.00760476	0.0178516
	1004	0.056289	0.0493755	0.0481242	0.0318269	0.0141299	0.00759869	0.0177989
	1003	0.0562221	0.0492657	0.0480204	0.0317581	0.0140843	0.00758676	0.0177696
	1002	0.0561556	0.0491394	0.0479388	0.0317288	0.014046	0.00756677	0.0177794
	1001	0.056012	0.0490419	0.0478616	0.0316795	0.0140163	0.00755174	0.0177456
	1000	0.0559402	0.0489296	0.0477633	0.0316364	0.0139997	0.00754672	0.0177362
	999	0.0558001	0.0488344	0.0476763	0.0315696	0.0139876	0.007541	0.0176925
	998	0.0556754	0.0487199	0.0476166	0.0315209	0.0139539	0.0075416	0.0176336
	997	0.0556127	0.0486153	0.0475299	0.0314694	0.0139042	0.00753473	0.0175925
	996	0.0554714	0.0485227	0.0474417	0.0314296	0.0138935	0.00752574	0.0175718
	995	0.0554419	0.048444	0.0473581	0.0313718	0.0138753	0.00750719	0.0175873
	994	0.0553336	0.0483389	0.0472808	0.0313055	0.0138716	0.00749962	0.0175847
	993	0.0552275	0.0482325	0.0471994	0.0312213	0.0138487	0.00749563	0.0175882
	992	0.0551293	0.0481214	0.0471237	0.0311888	0.0138362	0.00747988	0.0175564
	991	0.0549437	0.0480235	0.0470288	0.0311477	0.0138096	0.00746318	0.0174894
	990	0.0548367	0.0479275	0.0469572	0.0311135	0.0137773	0.00743949	0.0174349
	989	0.0546703	0.0478293	0.046846	0.0310755	0.0137418	0.00743352	0.017424
	988	0.0546005	0.0477252	0.0467958	0.0310412	0.013702	0.00743398	0.0174155
	987	0.0545705	0.0476248	0.0467242	0.0310174	0.0136715	0.00743249	0.0174013
	986	0.0544344	0.0475435	0.0466608	0.0309687	0.0136541	0.00744163	0.0173928
	985	0.0544329	0.0474851	0.0465777	0.0309098	0.0136378	0.00742847	0.0173543
	984	0.0543169	0.0473989	0.0464958	0.0308438	0.0136127	0.00741287	0.0173132
	983	0.0541646	0.0473099	0.0464157	0.0307795	0.0135913	0.00740137	0.0173229
	982	0.0540913	0.0472249	0.0462961	0.0307417	0.013569	0.0073907	0.0173143
	981	0.0539429	0.0471469	0.0462377	0.0306968	0.0135462	0.00737833	0.0172743
	980	0.0538928	0.0470486	0.0461423	0.0306408	0.0135451	0.00736991	0.0172735
	979	0.0538238	0.04698	0.0460669	0.0306106	0.0135071	0.00736529	0.0172351
	978	0.0537681	0.0469266	0.0460142	0.0305794	0.0134781	0.00736439	0.0172079
	977	0.0537015	0.0468422	0.045958	0.030572	0.0134351	0.00735277	0.0172011
	976	0.0535907	0.0467477	0.045886	0.030529	0.0134047	0.00735024	0.0171722
	975	0.0535387	0.0466439	0.0458232	0.0304651	0.0133975	0.00733654	0.0171333
	974	0.0534554	0.0465604	0.0457286	0.0304103	0.0133898	0.00733343	0.0170863
	973	0.0533825	0.0465109	0.0456841	0.0303858	0.0133718	0.00731518	0.017068
	972	0.0533091	0.0464496	0.0456213	0.0303493	0.0133487	0.00731401	0.0170466
	971	0.0531804	0.0463761	0.0455439	0.0303158	0.0133265	0.00731152	0.0170367
	970	0.0530733	0.0462913	0.0454218	0.0302693	0.013286	0.00731113	0.0170576
	969	0.0529948	0.0462034	0.0453746	0.0302365	0.0132591	0.00730798	0.0170386
	968	0.0529021	0.0461393	0.0453466	0.0302011	0.0132431	0.00730931	0.0170261
	967	0.0528499	0.046069	0.0453335	0.0301582	0.013237	0.00730784	0.0170212
	966	0.052788	0.0460095	0.0452484	0.0301113	0.0132221	0.00729191	0.0169859
	965	0.0526926	0.0459183	0.0451756	0.03009	0.0131877	0.00728296	0.0169446
	964	0.0526544	0.0458741	0.0450811	0.0300662	0.0131804	0.00726824	0.0169154
	963	0.0526394	0.0457884	0.0450134	0.0300264	0.0131615	0.00726522	0.0168737
	962	0.0525569	0.0457507	0.044982	0.0299762	0.0131524	0.00726301	0.0168341
	961	0.0524952	0.0457258	0.0449591	0.0299089	0.013133	0.00726547	0.0168117
	960	0.0523675	0.0456681	0.0449235	0.0298957	0.0131046	0.00727041	0.0167928
	959	0.052266	0.0455779	0.0448585	0.0298773	0.0130954	0.00726369	0.0167722
	958	0.0522321	0.0454888	0.0447563	0.0298869	0.0130599	0.00725384	0.0167672
	957	0.0521519	0.045404	0.0447054	0.0298403	0.0130619	0.00723842	0.0167622
	956	0.0521294	0.0453772	0.0446559	0.0298124	0.0130265	0.00722969	0.0167056
	955	0.052089	0.0453284	0.0446287	0.0297836	0.0130123	0.00723225	0.0166871
	954	0.0520541	0.0452976	0.0445795	0.0297176	0.0129763	0.00723646	0.016667
	953	0.0520273	0.0452128	0.0445421	0.029719	0.0129753	0.00722258	0.016636
	952	0.0519591	0.0451593	0.044513	0.0296773	0.0129645	0.00721133	0.0166315
	951	0.0518891	0.0450978	0.0444412	0.0296759	0.012946	0.00718482	0.0166307
	950	0.0517252	0.0450496	0.0443808	0.0296115	0.0129127	0.00718391	0.0166077
	949	0.0516697	0.0449623	0.0443118	0.0295665	0.0128778	0.00719778	0.0165972
	948	0.0516134	0.0449299	0.0442694	0.0294903	0.01287	0.00719188	0.0165575
	947	0.0515395	0.044888	0.044212	0.029468	0.0128469	0.00717785	0.016507
	946	0.0515375	0.0448669	0.0441568	0.0294476	0.0128441	0.0071633	0.0165104
	945	0.0514717	0.0447965	0.0441068	0.0294369	0.0128213	0.00717028	0.0164893
	944	0.0513437	0.0447302	0.0440741	0.0294112	0.0128014	0.00716005	0.0164556
	943	0.0512373	0.0446379	0.0440568	0.0293741	0.0127599	0.00715019	0.0163956
	942	0.0511935	0.0446023	0.0439932	0.0293407	0.0127209	0.00712317	0.0163607
	941	0.0510999	0.0445154	0.0439176	0.0292981	0.0127003	0.00711825	0.0163056
	940	0.0511164	0.0444813	0.043842	0.0292578	0.0126901	0.00711189	0.0163039
	939	0.0511548	0.0444238	0.043782	0.029255	0.0126776	0.00709018	0.0163487
	938	0.051119	0.0444106	0.0437465	0.0291914	0.0126605	0.00708603	0.0163341
	937	0.051101	0.0443477	0.0437042	0.0291395	0.0126352	0.00707662	0.0163346
	936	0.0510286	0.0442855	0.0436547	0.0290978	0.0126214	0.00705972	0.0163233
	935	0.0508725	0.0442491	0.0435734	0.0290509	0.0125957	0.00704012	0.0162602
	934	0.0507527	0.0441887	0.0434949	0.0290514	0.0125824	0.00702917	0.016211
	933	0.0507087	0.0441448	0.043461	0.0290124	0.0125461	0.00702348	0.0161918
	932	0.0506793	0.0440903	0.043443	0.0289713	0.012533	0.007026	0.0161205
	931	0.0506519	0.0440483	0.0434164	0.0289135	0.0124871	0.00701422	0.016085
	930	0.0506222	0.0439757	0.0433703	0.0288843	0.0124701	0.00700411	0.0160473
	929	0.0505685	0.0439179	0.0433293	0.0288732	0.0124447	0.00699094	0.0160162
	928	0.0504804	0.0438721	0.0432909	0.0288787	0.012433	0.00697501	0.0160465
	927	0.0504618	0.0438509	0.0432631	0.0288348	0.0123945	0.00695822	0.0160471
	926	0.0504029	0.0438157	0.0432173	0.0287956	0.0123808	0.00693707	0.0160153
	925	0.0503223	0.0437947	0.0431637	0.0287512	0.0123473	0.00691811	0.0159743
	924	0.050264	0.0437734	0.0431185	0.0287201	0.0123372	0.00692286	0.0159286
	923	0.0501807	0.0437577	0.0430811	0.028686	0.0123189	0.00692535	0.0159036
	922	0.0501377	0.0437119	0.0430566	0.0286474	0.0123044	0.0069141	0.0158797
	921	0.050104	0.0436584	0.0430159	0.0286138	0.0122893	0.00690054	0.015861
	920	0.0500768	0.0435744	0.0429333	0.0286054	0.0122781	0.00688578	0.0158488
	919	0.0500487	0.0435195	0.042887	0.02857	0.0122611	0.00688096	0.01585
	918	0.0500754	0.0434755	0.0428539	0.0285616	0.0122411	0.00688862	0.0158476
	917	0.0500447	0.0434772	0.0428209	0.0285279	0.0122267	0.00688309	0.0157939
	916	0.0500271	0.0434501	0.0428133	0.0285119	0.0122037	0.00688755	0.0157553
	915	0.0500174	0.0434073	0.0427238	0.0284647	0.0121913	0.00687389	0.0156903
	914	0.0499204	0.0433714	0.0426828	0.028447	0.0121943	0.00686043	0.0156371
	913	0.0498627	0.0433431	0.0425941	0.0284095	0.0121592	0.00686019	0.015673
	912	0.0497564	0.0432754	0.0425875	0.0283695	0.0121257	0.00686394	0.0156522
	911	0.049663	0.0432078	0.0425947	0.0283275	0.0120996	0.00683921	0.0156029
	910	0.0496151	0.0432027	0.042593	0.0282973	0.012103	0.00682563	0.0156119
	909	0.0495128	0.0431602	0.0425387	0.028276	0.012091	0.00679854	0.0155265
	908	0.0494656	0.0431408	0.0424749	0.0282584	0.0120659	0.00681193	0.0154686
	907	0.0494466	0.0431029	0.0424195	0.0282495	0.0120255	0.00679949	0.0155259
	906	0.0494708	0.0430368	0.0424059	0.0282217	0.0120109	0.00679528	0.0155177
	905	0.0494603	0.0430009	0.0424089	0.0281718	0.0120072	0.00678611	0.0155362
	904	0.0494518	0.042976	0.0423316	0.0281314	0.0119908	0.00677611	0.0155327
	903	0.0493813	0.0429902	0.042294	0.0281279	0.0119742	0.00677025	0.0154246
	902	0.0492467	0.0429184	0.0422156	0.0281253	0.0119334	0.00677519	0.0153629
	901	0.0492743	0.0428811	0.0422211	0.0281273	0.0119285	0.00677559	0.0153782
	900	0.0492503	0.0428541	0.0422239	0.0280993	0.0119112	0.00677971	0.0154074
	899	0.0492188	0.042816	0.0421864	0.0280694	0.0119074	0.00678422	0.0154237
	898	0.0492055	0.0427825	0.0421291	0.0280415	0.0118864	0.00677276	0.0154235
	897	0.0490449	0.0427462	0.0420797	0.0280209	0.011878	0.00676376	0.015361
	896	0.0489836	0.0427348	0.0421287	0.0279892	0.011859	0.00674185	0.0153051
	895	0.0489156	0.0427134	0.0420582	0.0279766	0.0118299	0.00671828	0.0153104
	894	0.0489028	0.0426774	0.0420252	0.0279407	0.0118081	0.00670109	0.0153157
	893	0.0489646	0.0426485	0.0419193	0.0279285	0.0117792	0.00668811	0.0152825
	892	0.0488739	0.0426351	0.0419003	0.0278948	0.0117467	0.00670341	0.015229
	891	0.0489093	0.0426551	0.0418325	0.0278908	0.0117304	0.00669197	0.015175
	890	0.0487868	0.0426294	0.0418487	0.0278457	0.0117236	0.00671413	0.0150826
	889	0.0487014	0.0425606	0.0417902	0.0278309	0.0117329	0.00670171	0.0150447
	888	0.0486972	0.0425196	0.0417955	0.0277951	0.0116997	0.00668761	0.0150497
	887	0.0485628	0.0424318	0.0417702	0.0277615	0.0116689	0.00667722	0.0150398
	886	0.0486351	0.0423969	0.0417439	0.0277438	0.0116726	0.00668372	0.0150343
	885	0.0487124	0.0423384	0.0417062	0.0277311	0.0116456	0.00666367	0.0150474
	884	0.0487261	0.0423528	0.0416245	0.027764	0.0116445	0.00667424	0.0150098
	883	0.0487348	0.0422963	0.0415556	0.0278035	0.0116146	0.00666388	0.0149528
	882	0.0486547	0.0422878	0.0415438	0.0277805	0.0116184	0.00664912	0.0149773
	881	0.0484186	0.0422637	0.041553	0.0276911	0.0116115	0.00664259	0.0149329
	880	0.0483918	0.0421897	0.0415135	0.0276071	0.0116065	0.00665273	0.0149383
	879	0.0484093	0.0421366	0.0414747	0.0275588	0.0115882	0.00665904	0.0149379
	878	0.0482684	0.0421209	0.0414239	0.0275349	0.0115642	0.006651	0.0149041
	877	0.0483438	0.0420885	0.0413869	0.0275163	0.0115285	0.00662578	0.014896
	876	0.048259	0.0420672	0.0413276	0.0274741	0.0114853	0.00661513	0.014873
	875	0.0480767	0.0419978	0.0412872	0.0274559	0.0114657	0.00660419	0.0148619
	874	0.0481223	0.0419945	0.041219	0.0274128	0.0114335	0.00660266	0.0148561
	873	0.0480719	0.0419721	0.04119	0.0274338	0.0114383	0.0066066	0.0148713
	872	0.0479634	0.0419261	0.0411823	0.0274113	0.011432	0.00660825	0.0148211
	871	0.0480184	0.0418549	0.0411399	0.0274611	0.0114319	0.00658992	0.0148429
	870	0.0479828	0.041817	0.0410787	0.0274286	0.0114096	0.00660323	0.0147775
	869	0.0479756	0.0418025	0.0410358	0.0273867	0.0113976	0.00657876	0.0147369
	868	0.0480296	0.0418435	0.0410745	0.0273155	0.0113859	0.00659234	0.0147394
	867	0.0481228	0.0418522	0.0411213	0.0272808	0.0113687	0.00657872	0.0147291
	866	0.0481748	0.0418265	0.0411028	0.0272484	0.0113806	0.00658727	0.014744
	865	0.0480819	0.0416323	0.0410639	0.0272481	0.0113869	0.00658578	0.0147168
	864	0.0479751	0.0416546	0.0410015	0.0271696	0.0113176	0.00657934	0.0146748
	863	0.0477597	0.0416037	0.0409189	0.0271708	0.0112633	0.00656779	0.014637
	862	0.047648	0.0417061	0.0409085	0.0271597	0.011247	0.00655105	0.0146017
	861	0.0476741	0.0417117	0.0408603	0.0271855	0.011247	0.00654023	0.0145707
	860	0.0477058	0.0416941	0.0407967	0.0271435	0.0112551	0.00652297	0.0145904
	859	0.0476638	0.0416862	0.0406948	0.0270827	0.0112409	0.00652072	0.0145085
	858	0.0474787	0.0415663	0.0407076	0.0270293	0.0112601	0.00651528	0.0144631
	857	0.0472584	0.0414834	0.0407184	0.0270154	0.0112229	0.00652818	0.0143745
	856	0.0471482	0.0414421	0.0407269	0.0270029	0.0111863	0.00654926	0.0143662
	855	0.0471411	0.041373	0.040665	0.0270217	0.0111438	0.00656086	0.014321
	854	0.0472038	0.041364	0.0406377	0.0270154	0.0111135	0.00655083	0.0143025
	853	0.0472367	0.0413226	0.0406066	0.0269968	0.0111449	0.00655763	0.014342
	852	0.047225	0.0414152	0.0405684	0.0269811	0.0111489	0.00654281	0.0142975
	851	0.0471779	0.0413856	0.0404806	0.0269387	0.0111545	0.00650976	0.0143354
	850	0.0451682	0.0395552	0.0386858	0.0257457	0.0101516	0.0057849	0.0128255
	849	0.0452717	0.0395225	0.0387752	0.0255737	0.0101681	0.00576408	0.013048
	848	0.0449108	0.0394628	0.0387171	0.0255886	0.0101675	0.00578448	0.0130013
	847	0.0445829	0.0395343	0.0387568	0.0255188	0.0100983	0.005756	0.0128827
	846	0.0445634	0.0395208	0.0386576	0.0254864	0.0100613	0.00572902	0.0128657
	845	0.0444378	0.0394013	0.0386026	0.0253964	0.0100477	0.00573195	0.0126694
	844	0.0445212	0.0391801	0.0385085	0.0253028	0.0100176	0.00576295	0.0126923
	843	0.0446999	0.0391179	0.0383799	0.0252444	0.0100084	0.00579519	0.012778
	842	0.0443782	0.0391015	0.0383462	0.0252911	0.0100094	0.005708	0.0126994
	841	0.0443322	0.0391808	0.03818	0.0252333	0.00998666	0.00570355	0.0126625
	840	0.0445603	0.0392247	0.0381836	0.0252481	0.00997787	0.0056202	0.0127263
	839	0.0444007	0.0392089	0.0381186	0.0252664	0.00995771	0.00568423	0.0126424
	838	0.0445616	0.0391175	0.0381128	0.0253051	0.00995626	0.00568154	0.0127254
	837	0.0445536	0.0390744	0.0381842	0.0252145	0.00995784	0.00569345	0.0127368
	836	0.0442478	0.0388197	0.0381656	0.0251383	0.00993693	0.00570453	0.0126212
	835	0.0442668	0.0387721	0.0381571	0.025129	0.0099311	0.00567617	0.0125012
	834	0.0441813	0.0387778	0.0380744	0.0250789	0.00993727	0.00574067	0.012458
	833	0.0441307	0.0387779	0.0380573	0.0250381	0.009888	0.00574677	0.0124227
	832	0.0442145	0.0388654	0.0380436	0.0249666	0.00990745	0.00573766	0.0124933
	831	0.0442214	0.0387907	0.0380024	0.0249069	0.00988321	0.00570695	0.0125871
	830	0.0441415	0.0387958	0.0379861	0.0248795	0.00986982	0.0057018	0.0125625
	829	0.0440273	0.0387574	0.037917	0.024886	0.0098573	0.00570777	0.012521
	828	0.0437941	0.0387636	0.0378697	0.024939	0.00987853	0.00571033	0.0124648
	827	0.0435968	0.0388014	0.0377743	0.0249775	0.00987112	0.0056901	0.0123878
	826	0.0435844	0.0388306	0.0378095	0.024923	0.00991443	0.00570866	0.0123627
	825	0.043659	0.0388295	0.0378202	0.0248556	0.00990714	0.00570229	0.0124574
	824	0.0438595	0.0387859	0.0378339	0.0248145	0.00991353	0.00569515	0.0125001
	823	0.0439087	0.0387366	0.0377307	0.0247776	0.00989695	0.00569384	0.0125585
	822	0.0439556	0.0386694	0.0377174	0.0248228	0.00990343	0.00570965	0.0126478
	821	0.0438288	0.038637	0.0376996	0.0247278	0.00987753	0.00573906	0.0125618
	820	0.0437179	0.0385604	0.0377147	0.0247986	0.00985424	0.00576705	0.0125634
	819	0.0437606	0.0385598	0.0376745	0.0248388	0.00985104	0.00576809	0.0125847
	818	0.043685	0.0385336	0.0376735	0.0248915	0.00986988	0.00578686	0.0126173
	817	0.0436812	0.0386142	0.0376778	0.024835	0.00991187	0.0057783	0.012676
	816	0.0436754	0.0385987	0.0376618	0.0248038	0.00993223	0.00576361	0.0126822
	815	0.0435873	0.0385816	0.0376195	0.0247794	0.00992654	0.00577065	0.0126603
	814	0.0435391	0.038546	0.0375983	0.0248153	0.00991742	0.00577084	0.012577
	813	0.0435965	0.0385046	0.0375707	0.0248004	0.00993655	0.00578234	0.0126005
	812	0.0435753	0.0384608	0.0375644	0.0247807	0.00992031	0.00579059	0.0125765
	811	0.0435378	0.0384396	0.0375893	0.0247474	0.00995873	0.00580355	0.012547
	810	0.0435135	0.0384734	0.0375082	0.0247938	0.00989935	0.00582786	0.0125796
	809	0.0434228	0.0385034	0.0374564	0.0247833	0.00990649	0.00582951	0.0125064
	808	0.0433518	0.0384896	0.0374589	0.0248526	0.00992239	0.00582917	0.0125557
	807	0.0433824	0.038483	0.0375232	0.0247888	0.00992351	0.0058406	0.0125735
	806	0.0434897	0.0384518	0.0375677	0.0247876	0.0099284	0.00587371	0.0126119
	805	0.0435247	0.0384372	0.0375035	0.0247706	0.00996711	0.00588263	0.01268
	804	0.0436153	0.0384766	0.0374419	0.0247867	0.00997338	0.00590122	0.0126761
	803	0.0434427	0.0384243	0.0373628	0.024767	0.0099868	0.00587934	0.0126468
	802	0.0433983	0.0384465	0.0372945	0.0247587	0.0099725	0.00588779	0.0126152
	801	0.0434715	0.0384378	0.0373354	0.0247438	0.00996083	0.00587486	0.0126618
	800	0.0433642	0.0384523	0.0374183	0.024799	0.00996245	0.00591947	0.0126349
	799	0.0434533	0.0384313	0.0373595	0.0248446	0.0099675	0.00594731	0.0126369
	798	0.0433553	0.0383996	0.037355	0.0248935	0.00997522	0.00597645	0.0126029
	797	0.0433196	0.0383909	0.037328	0.0249364	0.00999165	0.00595739	0.0126432
	796	0.0433292	0.0384542	0.0373098	0.0249209	0.0100507	0.00595678	0.0126536
	795	0.0432982	0.0383939	0.0373009	0.0248578	0.0100572	0.00598717	0.0126896
	794	0.0433589	0.0383605	0.0372444	0.0248525	0.0101079	0.00602848	0.0127037
	793	0.04327	0.0382859	0.0373089	0.0248242	0.0100951	0.00604595	0.0126639
	792	0.0432646	0.0382719	0.0372864	0.0248305	0.0101102	0.00604886	0.0127222
	791	0.0433738	0.0383136	0.0373779	0.0248271	0.0100964	0.00606801	0.012764
	790	0.0432254	0.038305	0.0374463	0.0248145	0.0100818	0.00606662	0.0127492
	789	0.0432691	0.0383368	0.0374968	0.0248406	0.0101166	0.00609937	0.0127464
	788	0.0433065	0.0383144	0.0374373	0.024909	0.0101149	0.00610396	0.0127615
	787	0.043178	0.0383133	0.0373504	0.0249693	0.0101707	0.00612959	0.0127788
	786	0.0433247	0.0382608	0.0373065	0.0250315	0.0101961	0.00616829	0.0128666
	785	0.0433129	0.0381847	0.0372545	0.0250163	0.0102219	0.00620157	0.0128546
	784	0.043505	0.0381829	0.0372627	0.024999	0.0102931	0.00623644	0.0128686
	783	0.0435504	0.0382141	0.037238	0.0249734	0.0102927	0.00626951	0.0128765
	782	0.0436196	0.0382647	0.037289	0.024962	0.0103041	0.00627797	0.0129367
	781	0.0435823	0.0382573	0.0372544	0.0250148	0.0103	0.00630371	0.0129936
	780	0.0432972	0.0382259	0.0373138	0.0250664	0.0103269	0.00632438	0.0129977
	779	0.0432776	0.0382277	0.037282	0.0251294	0.0103507	0.00635176	0.0130628
	778	0.0431528	0.0382206	0.0372746	0.0251219	0.0103624	0.00638453	0.0130559
	777	0.0432245	0.0382073	0.0372806	0.0251727	0.0103997	0.00640491	0.0131023
	776	0.0433823	0.0382338	0.037278	0.0251673	0.010446	0.00646709	0.0131296
	775	0.0434478	0.0382863	0.0372498	0.0251675	0.0104893	0.00647298	0.0131366
	774	0.0435124	0.0382853	0.0372738	0.0251856	0.0105179	0.00652497	0.0131215
	773	0.0434926	0.0383187	0.0373151	0.0252089	0.0105356	0.00652842	0.0131652
	772	0.0434528	0.0383229	0.0373477	0.0252699	0.0105752	0.00655574	0.0131916
	771	0.0434716	0.0382963	0.0373239	0.0252969	0.0105603	0.00659842	0.0132268
	770	0.0434135	0.0383316	0.03729	0.0253211	0.0105987	0.0066378	0.0133023
	769	0.0434481	0.0383468	0.0372765	0.025341	0.0106392	0.00669276	0.0132841
	768	0.0434242	0.0384144	0.037321	0.0253768	0.0106914	0.00673535	0.0133041
	767	0.0434507	0.038407	0.037345	0.0254486	0.0107537	0.0067723	0.0133367
	766	0.0435337	0.0384042	0.0373796	0.0254326	0.0107785	0.00681772	0.0133603
	765	0.0435226	0.0383887	0.0373865	0.0254605	0.0108296	0.0068365	0.0134188
	764	0.0435235	0.0383752	0.0374165	0.0254586	0.0108841	0.0068791	0.0134428
	763	0.0435271	0.0383611	0.0374417	0.0255784	0.0109325	0.00691435	0.0134782
	762	0.0434975	0.0383616	0.0374971	0.0256089	0.0109887	0.00696353	0.0135249
	761	0.0435593	0.0384036	0.0374959	0.025692	0.0110249	0.00700453	0.013588
	760	0.0435538	0.0384761	0.0374474	0.025714	0.0110427	0.00703431	0.0136548
	759	0.0435652	0.0385249	0.0374659	0.0257672	0.0111018	0.00709918	0.0136763
	758	0.043574	0.0385387	0.0374736	0.025826	0.0111745	0.00714982	0.0137405
	757	0.0436234	0.0385427	0.0375755	0.0259049	0.0112374	0.00723668	0.0137879
	756	0.0437066	0.0385955	0.0375245	0.0259197	0.0112902	0.00728088	0.013872
	755	0.0437785	0.0386529	0.0375865	0.0259111	0.0113464	0.007354	0.0139884
	754	0.0439081	0.0386644	0.0376117	0.025969	0.0114091	0.0073996	0.0140372
	753	0.0439228	0.0386668	0.0376911	0.0260684	0.0114676	0.00744419	0.0140947
	752	0.0440183	0.0386758	0.0377463	0.0262006	0.0115123	0.0074893	0.0141764
	751	0.0439143	0.0387701	0.0377038	0.0262463	0.0115731	0.00754582	0.0142031
	750	0.0438202	0.0388114	0.0377174	0.026281	0.0116387	0.00761881	0.0142688
	749	0.0437878	0.0388644	0.0377565	0.0263177	0.0117221	0.00771154	0.0143112
	748	0.0438025	0.0388614	0.0378431	0.0263877	0.0118236	0.00776932	0.0143751
	747	0.0439239	0.0389117	0.0378982	0.0264942	0.0119273	0.0078332	0.0144509
	746	0.0440291	0.0389243	0.0379856	0.0265821	0.0120129	0.00786199	0.0145132
	745	0.0440785	0.0389568	0.0380051	0.0266899	0.0120827	0.00794753	0.0145929
	744	0.0440272	0.0389691	0.0380643	0.0267756	0.0121607	0.0080244	0.0146724
	743	0.0440601	0.0390027	0.0380991	0.0268491	0.0122459	0.00811771	0.014749
	742	0.0440825	0.0390513	0.0381622	0.026905	0.0123377	0.00820165	0.0148031
	741	0.0441731	0.0390918	0.038235	0.0269761	0.0124191	0.00828414	0.0148866
	740	0.0443267	0.0392239	0.0381664	0.0270628	0.0125443	0.00837567	0.0150074
	739	0.0444144	0.0392923	0.0382131	0.0271608	0.0126419	0.00846149	0.0151694
	738	0.0444835	0.0392802	0.038294	0.0272583	0.0127021	0.00851976	0.0152809
	737	0.0445051	0.0393482	0.0383866	0.0273836	0.0127855	0.0085814	0.0153916
	736	0.0445471	0.0394244	0.0385127	0.0274857	0.0128639	0.00866526	0.0155592
	735	0.0446188	0.0394748	0.0385591	0.0275943	0.0129856	0.00876261	0.0156078
	734	0.0446997	0.0395158	0.038558	0.0276891	0.0130735	0.00887853	0.0156972
	733	0.0447541	0.0395522	0.038621	0.0277935	0.0132017	0.00898689	0.0157722
	732	0.0448124	0.0396637	0.0387023	0.0278965	0.0133098	0.00908279	0.0158365
	731	0.0448307	0.0397372	0.0388178	0.0280388	0.0134357	0.00919584	0.0159586
	730	0.0449682	0.039824	0.0389277	0.0281337	0.0135388	0.00930476	0.0161138
	729	0.0450819	0.0398869	0.0389915	0.0283037	0.0136631	0.00941325	0.016259
	728	0.0451044	0.0399701	0.039111	0.0284395	0.0137961	0.00951095	0.0163824
	727	0.0452553	0.0400231	0.0391686	0.028563	0.013943	0.00961789	0.0165115
	726	0.0453213	0.040125	0.039254	0.0287041	0.0140671	0.00971958	0.0166301
	725	0.0454566	0.0401906	0.0393291	0.0287829	0.0142117	0.00983789	0.0167719
	724	0.0455303	0.0402979	0.0393984	0.0288761	0.0143493	0.00995576	0.0169124
	723	0.0455795	0.0403733	0.0395268	0.0290444	0.0145021	0.0100628	0.0170843
	722	0.0456514	0.0404372	0.0396619	0.0291932	0.0146292	0.0101954	0.0171858
	721	0.045697	0.0405811	0.0397827	0.029366	0.014768	0.0103342	0.017339
	720	0.0458296	0.0406706	0.0398635	0.0294988	0.0149299	0.0104826	0.0174833
	719	0.0460243	0.0407644	0.0399616	0.0296663	0.0150798	0.0106349	0.0176318
	718	0.0461999	0.0408243	0.0400439	0.0298262	0.0152514	0.0107586	0.017812
	717	0.0462999	0.0409246	0.0401806	0.0300377	0.0154174	0.0108836	0.0179607
	716	0.0464415	0.0410309	0.0403289	0.0301994	0.0155965	0.0110506	0.0181293
	715	0.046494	0.0411395	0.0404572	0.030383	0.0157739	0.011208	0.0183118
	714	0.0465528	0.04128	0.0406017	0.030527	0.0159612	0.0113545	0.0185215
	713	0.0466512	0.0414174	0.0407464	0.0307244	0.0161643	0.0115162	0.0186991
	712	0.04685	0.0415652	0.0408915	0.0309718	0.0163326	0.0116592	0.0188991
	711	0.0470779	0.0416916	0.041003	0.031176	0.016516	0.0118518	0.019071
	710	0.0473208	0.0418107	0.0411031	0.0313611	0.0167215	0.012035	0.0192922
	709	0.0475557	0.0419733	0.0412429	0.0315293	0.0169095	0.0122171	0.0195045
	708	0.0477215	0.0421072	0.041412	0.0317705	0.0171556	0.0124135	0.0197177
	707	0.0478391	0.0422531	0.041579	0.0319772	0.0173662	0.0126053	0.0199242
	706	0.0480027	0.0423822	0.0417084	0.0322182	0.0176216	0.0128177	0.0201485
	705	0.0481074	0.0425378	0.0419263	0.0324136	0.0178323	0.0129975	0.0203673
	704	0.0482855	0.0427023	0.0420783	0.0326753	0.0180574	0.0131864	0.0206016
	703	0.0484275	0.0428684	0.0422635	0.0329125	0.0182847	0.0133887	0.020821
	702	0.0486524	0.0430393	0.0424427	0.0331602	0.018542	0.0135868	0.0210683
	701	0.0489064	0.0431623	0.04263	0.0333804	0.0188106	0.0138097	0.0212883
	700	0.0491792	0.0433405	0.042857	0.0336174	0.0190762	0.0140277	0.0215732
	699	0.049435	0.0435221	0.0430761	0.0338893	0.0193491	0.0142617	0.0218496
	698	0.0495433	0.0437208	0.0432899	0.0341594	0.0196246	0.0145151	0.0220472
	697	0.0497583	0.0439024	0.0434891	0.0344714	0.0199034	0.014734	0.0223652
	696	0.0498694	0.0440908	0.0436712	0.0347623	0.0201887	0.0149939	0.0225991
	695	0.050093	0.0442958	0.0439129	0.0350506	0.020451	0.0152403	0.0229178
	694	0.0503356	0.0444888	0.0441283	0.0353386	0.0207598	0.0155421	0.0232553
	693	0.0505101	0.0446915	0.044411	0.0356223	0.0210595	0.0158176	0.0235462
	692	0.0508184	0.0448955	0.0446669	0.0359234	0.0213863	0.0161069	0.0239387
	691	0.0510496	0.045127	0.0449357	0.0362169	0.0217353	0.0163819	0.0243011
	690	0.0512943	0.0453535	0.0451989	0.036522	0.0220653	0.0166695	0.0246668
	689	0.0516176	0.0456262	0.0454769	0.0367993	0.0224466	0.0169827	0.0250793
	688	0.051879	0.0458796	0.0457226	0.037129	0.0228199	0.0172866	0.0254548
	687	0.0522021	0.0461458	0.0459956	0.0374571	0.0231795	0.0176288	0.0258533
	686	0.0525744	0.0463911	0.0462512	0.0378124	0.0235395	0.0179534	0.0262803
	685	0.0528834	0.0466326	0.0465723	0.0381326	0.0239086	0.0183125	0.0266788
	684	0.0531865	0.0469125	0.0469064	0.038456	0.0242815	0.0186777	0.0270538
	683	0.0535067	0.047176	0.0472124	0.0388338	0.0247116	0.0190078	0.02744
	682	0.0538588	0.0474706	0.0475218	0.0392461	0.0251265	0.0193186	0.0278515
	681	0.0542475	0.0477812	0.04781	0.0396841	0.0255362	0.0196663	0.02826
	680	0.054666	0.0481177	0.0481165	0.0401118	0.0259223	0.0200191	0.0286799
	679	0.0550624	0.0484382	0.0484395	0.0405222	0.0263358	0.0204037	0.0291047
	678	0.0554084	0.0487824	0.0487838	0.0409489	0.0267701	0.020764	0.0294657
	677	0.0558436	0.0491116	0.0491211	0.0413898	0.0272077	0.0211207	0.0298913
	676	0.0561592	0.0494921	0.0495282	0.0417838	0.0277142	0.0215424	0.0303085
	675	0.0565048	0.0498421	0.0498783	0.0422935	0.028215	0.0219565	0.0307283
	674	0.056942	0.0501525	0.050333	0.0427936	0.0287677	0.0224376	0.0312338
	673	0.0573147	0.0505388	0.0507325	0.0433757	0.0292951	0.0229331	0.031714
	672	0.0577602	0.0509828	0.0511991	0.0438659	0.0298145	0.0234359	0.0322541
	671	0.0582683	0.051399	0.0516469	0.0443536	0.0303724	0.023929	0.0328547
	670	0.0587428	0.0518883	0.0521185	0.0448536	0.0309445	0.0244355	0.033425
	669	0.0592108	0.0522656	0.0525956	0.0454162	0.0315437	0.0249336	0.0340444
	668	0.0597917	0.0527115	0.0530491	0.0459533	0.0321676	0.0254798	0.0346713
	667	0.0602948	0.0531474	0.0536215	0.0465481	0.03283	0.0260342	0.0353564
	666	0.0608255	0.053675	0.0541501	0.047164	0.0334532	0.0266289	0.036021
	665	0.0613493	0.054168	0.0547016	0.0477924	0.0341102	0.0272186	0.0367175
	664	0.0619325	0.0546737	0.055255	0.0484291	0.0348081	0.0278165	0.0374673
	663	0.0626043	0.0551978	0.0558318	0.0490853	0.0355467	0.0284624	0.0381828
	662	0.0632305	0.0557771	0.0564231	0.0497772	0.0363218	0.0291058	0.0388876
	661	0.0639653	0.0563173	0.0570354	0.050469	0.0370719	0.0297644	0.0396404
	660	0.0645537	0.0569073	0.0575902	0.051177	0.037829	0.0304039	0.0403978
	659	0.0651339	0.0575149	0.0582493	0.0518897	0.0385966	0.0311117	0.0411577
	658	0.0657876	0.0581242	0.0589365	0.0526342	0.0394093	0.031839	0.0419875
	657	0.0665125	0.0587016	0.0596318	0.0534277	0.0402452	0.0326071	0.0428825
	656	0.0672274	0.0593373	0.0603325	0.0542411	0.0411187	0.0333949	0.0437285
	655	0.068	0.0600159	0.0610674	0.0550589	0.0420076	0.0342273	0.044597
	654	0.0688143	0.0607363	0.0618435	0.0558753	0.0429361	0.0350477	0.0456372
	653	0.0695559	0.0614016	0.0625851	0.0567261	0.043845	0.0358868	0.0466035
	652	0.0704054	0.062127	0.0633937	0.0575863	0.0447941	0.0367462	0.0476798
	651	0.0712739	0.0628727	0.0641919	0.0585112	0.0457928	0.0376161	0.0488146
	650	0.0721537	0.0636384	0.0650464	0.0594038	0.0468526	0.0385547	0.0498441
	649	0.0729689	0.0644202	0.0658564	0.0603721	0.0479046	0.0394636	0.050894
	648	0.0738583	0.0652461	0.0667483	0.0613284	0.0489907	0.0404693	0.0519624
	647	0.0747253	0.0660644	0.0677067	0.0623558	0.0500599	0.0414324	0.0530283
	646	0.0756722	0.0669203	0.0687025	0.0633803	0.0512044	0.0424924	0.0542577
	645	0.0766458	0.0677529	0.0696813	0.0644696	0.0523702	0.0435822	0.0554468
	644	0.0776239	0.0686456	0.0706488	0.0655969	0.0535562	0.0446735	0.0567408
	643	0.0786802	0.0695783	0.0716616	0.0667544	0.0548088	0.0458465	0.0581187
	642	0.0796456	0.0705705	0.0727476	0.0679129	0.0560997	0.0470276	0.059411
	641	0.0807595	0.0715369	0.0738312	0.0690976	0.0574191	0.0482299	0.0608728
	640	0.0819012	0.0725157	0.0749336	0.0703295	0.058761	0.0494511	0.0623456
	639	0.0830907	0.073552	0.0761216	0.0715958	0.0601333	0.0507197	0.0638673
	638	0.0842921	0.0745997	0.077346	0.0728903	0.0615888	0.0520628	0.0654693
	637	0.085528	0.0757254	0.0786162	0.0742305	0.0630529	0.0534332	0.0670399
	636	0.0867416	0.0768789	0.079904	0.0755977	0.0645383	0.054845	0.0685774
	635	0.0879894	0.0780216	0.0811951	0.0769375	0.0660828	0.0562414	0.0702611
	634	0.0893051	0.0792088	0.0825832	0.0783589	0.0677089	0.0577224	0.0719278
	633	0.0906042	0.0804394	0.083916	0.0798091	0.0693566	0.0592597	0.0736974
	632	0.0919645	0.0817237	0.0853244	0.0813342	0.0710527	0.0608575	0.0756537
	631	0.0934058	0.0829942	0.0868076	0.082877	0.072775	0.0624663	0.0775353
	630	0.0948552	0.084325	0.0882738	0.0845124	0.0745253	0.0641361	0.079594
	629	0.0963949	0.0857268	0.0898524	0.0861592	0.0763414	0.0658	0.0816559
	628	0.0979457	0.087152	0.0914617	0.0878302	0.0782455	0.0675552	0.0837694
	627	0.0995305	0.0885757	0.0931352	0.089573	0.0801533	0.0693777	0.0859468
	626	0.101035	0.0900121	0.0948429	0.0913878	0.082185	0.0713246	0.088078
	625	0.102527	0.0915357	0.0965946	0.0932875	0.0842173	0.0733336	0.0904467
	624	0.104184	0.0931529	0.0984355	0.0952388	0.0863322	0.0753384	0.092765
	623	0.105839	0.0948214	0.10024	0.0972416	0.0885626	0.0774459	0.0952011
	622	0.107673	0.0965038	0.102192	0.0992902	0.0908445	0.0796251	0.0978
	621	0.109596	0.0981551	0.104224	0.101349	0.0932093	0.0818943	0.100393
	620	0.11145	0.0999793	0.106337	0.103475	0.0956132	0.0841898	0.103092
	619	0.113259	0.101779	0.108441	0.105701	0.0980366	0.0865539	0.10588
	618	0.115208	0.103753	0.110601	0.107998	0.100567	0.0889459	0.108807
	617	0.11726	0.10563	0.112836	0.110347	0.103203	0.091458	0.111799
	616	0.119396	0.107622	0.11519	0.112776	0.105922	0.0940686	0.114822
	615	0.12172	0.109715	0.117607	0.115275	0.10871	0.09679	0.118065
	614	0.123877	0.111884	0.120114	0.117904	0.111529	0.0995435	0.12129
	613	0.126104	0.114121	0.122649	0.120566	0.114425	0.102471	0.124748
	612	0.128331	0.116341	0.12527	0.123253	0.117518	0.105402	0.128438
	611	0.130542	0.118678	0.127949	0.126057	0.120702	0.10848	0.132061
	610	0.133108	0.121033	0.130812	0.128996	0.124033	0.111642	0.1359
	609	0.135656	0.123459	0.133701	0.132007	0.127373	0.114938	0.13979
	608	0.138386	0.125986	0.136661	0.135054	0.130752	0.118296	0.143881
	607	0.141116	0.128599	0.139704	0.138198	0.13421	0.121723	0.148078
	606	0.143747	0.131262	0.142835	0.141406	0.137758	0.1253	0.152489
	605	0.146521	0.133978	0.146113	0.144749	0.141446	0.128921	0.156918
	604	0.14923	0.136752	0.149448	0.148136	0.145201	0.13264	0.161387
	603	0.152061	0.139635	0.152877	0.151633	0.149056	0.136463	0.166058
	602	0.155067	0.142591	0.15631	0.155137	0.153087	0.140507	0.170818
	601	0.157898	0.145591	0.159916	0.158895	0.1572	0.144597	0.175746
	600	0.161871	0.148803	0.163907	0.162977	0.161703	0.148951	0.18099
	599	0.16496	0.151953	0.167643	0.166908	0.166047	0.15327	0.186085
	598	0.168244	0.155174	0.171568	0.170903	0.170478	0.157765	0.191468
	597	0.171703	0.158595	0.175684	0.174981	0.174959	0.162387	0.197177
	596	0.175193	0.162045	0.179839	0.179252	0.179529	0.167155	0.20305
	595	0.178773	0.165696	0.184097	0.183665	0.184367	0.172024	0.209142
	594	0.182259	0.169337	0.188514	0.18816	0.189299	0.177026	0.215197
	593	0.185826	0.173076	0.193011	0.192705	0.194464	0.182205	0.221389
	592	0.189509	0.176847	0.1977	0.197462	0.199697	0.187486	0.227889
	591	0.193357	0.180768	0.202554	0.202333	0.205005	0.193031	0.234536
	590	0.197385	0.184744	0.207504	0.207339	0.210446	0.198535	0.241506
	589	0.201477	0.188917	0.212563	0.212402	0.216025	0.204404	0.248714
	588	0.205631	0.193088	0.217747	0.217602	0.22173	0.210305	0.256047
	587	0.209875	0.197472	0.223109	0.222945	0.227621	0.216499	0.263656
	586	0.214325	0.201893	0.228603	0.228444	0.233653	0.222585	0.271419
	585	0.218693	0.206465	0.234189	0.234134	0.239849	0.229002	0.279099
	584	0.223344	0.211071	0.239942	0.240004	0.246136	0.23541	0.287273
	583	0.227838	0.21589	0.245821	0.24604	0.252604	0.242202	0.295435
	582	0.232529	0.220687	0.251803	0.25219	0.259214	0.249091	0.303956
	581	0.237371	0.225693	0.258085	0.258425	0.266085	0.256247	0.31289
	580	0.242187	0.230787	0.264398	0.26489	0.273124	0.26366	0.321817
	579	0.247232	0.236146	0.271022	0.271478	0.280455	0.271253	0.331112
	578	0.252336	0.241528	0.277799	0.278284	0.287773	0.279054	0.340663
	577	0.257619	0.247103	0.284791	0.285299	0.295337	0.286943	0.350428
	576	0.263201	0.252781	0.291954	0.292453	0.302971	0.295026	0.360437
	575	0.268888	0.258708	0.299306	0.299906	0.31093	0.303347	0.370892
	574	0.274547	0.264704	0.30692	0.307382	0.319246	0.311946	0.381447
	573	0.280389	0.270855	0.314772	0.315229	0.327655	0.320781	0.392248
	572	0.286151	0.277156	0.322793	0.323175	0.336295	0.330017	0.403496
	571	0.292095	0.28372	0.330968	0.331405	0.345048	0.339378	0.414887
	570	0.298284	0.290465	0.339322	0.339796	0.354096	0.349025	0.426636
	569	0.304517	0.297399	0.348001	0.348498	0.363344	0.358853	0.43897
	568	0.311141	0.304423	0.356999	0.357474	0.372916	0.369167	0.451487
	567	0.31786	0.311616	0.365989	0.366606	0.382816	0.379679	0.464489
	566	0.325013	0.318981	0.375358	0.375859	0.39296	0.390488	0.478018
	565	0.332477	0.326752	0.384839	0.385502	0.403333	0.401486	0.491691
	564	0.339697	0.334765	0.39489	0.395334	0.414003	0.412844	0.505589
	563	0.347052	0.342932	0.405029	0.405496	0.42477	0.424497	0.519728
	562	0.354716	0.351026	0.415514	0.415781	0.435819	0.436381	0.534355
	561	0.36241	0.359419	0.426091	0.426421	0.447162	0.448598	0.549254
	560	0.370467	0.368046	0.436823	0.437326	0.458785	0.460955	0.564415
	559	0.378837	0.37695	0.448091	0.448475	0.470963	0.473708	0.579945
	558	0.386809	0.386009	0.459477	0.459685	0.48318	0.486809	0.595806
	557	0.39501	0.395271	0.471191	0.471367	0.495701	0.500239	0.612139
	556	0.403491	0.404779	0.483117	0.483301	0.508467	0.514048	0.629005
	555	0.412295	0.41453	0.495367	0.495614	0.521436	0.52802	0.646766
	554	0.421548	0.42451	0.507985	0.508091	0.53478	0.542339	0.664693
	553	0.430802	0.434857	0.520741	0.520774	0.548247	0.557126	0.682923
	552	0.44012	0.445226	0.533654	0.533881	0.56221	0.572003	0.70126
	551	0.449471	0.455821	0.546776	0.5472	0.576131	0.587191	0.719357
	550	0.458929	0.466699	0.560377	0.560817	0.590546	0.602634	0.737718
	549	0.468746	0.477785	0.574242	0.574737	0.605095	0.618543	0.756644
	548	0.479036	0.489022	0.588547	0.588831	0.620305	0.63489	0.776567
	547	0.489311	0.500673	0.603297	0.603243	0.635729	0.651465	0.796486
	546	0.499947	0.512494	0.618359	0.618074	0.6516	0.668521	0.817168
	545	0.511069	0.524794	0.633994	0.633742	0.667678	0.686056	0.838126
	544	0.521964	0.537339	0.649517	0.649489	0.684163	0.704174	0.859165
	543	0.533164	0.550105	0.665651	0.66545	0.701077	0.722455	0.881117
	542	0.544703	0.563068	0.682101	0.681466	0.718005	0.740844	0.903195
	541	0.556097	0.576101	0.698703	0.698034	0.735369	0.75949	0.925831
	540	0.568201	0.589755	0.71583	0.715084	0.752729	0.778419	0.948924
	539	0.580097	0.603593	0.733178	0.73236	0.77066	0.797757	0.972199
	538	0.592483	0.617649	0.75093	0.749826	0.788801	0.817688	0.995908
	537	0.605008	0.631843	0.768775	0.767568	0.807317	0.837775	1.0196
	536	0.617676	0.646198	0.787047	0.785822	0.826059	0.858321	1.04406
	535	0.630871	0.660823	0.805701	0.80422	0.845451	0.878737	1.06844
	534	0.643882	0.676131	0.824712	0.823181	0.864949	0.899735	1.09365
	533	0.657351	0.69152	0.844149	0.842475	0.884952	0.921133	1.11878
	532	0.670797	0.707377	0.864044	0.862194	0.905139	0.942695	1.14392
	531	0.684793	0.723308	0.884561	0.882618	0.92577	0.964964	1.16997
	530	0.698857	0.73985	0.905227	0.903264	0.946753	0.98738	1.1959
	529	0.713041	0.756665	0.926091	0.923947	0.968084	1.01042	1.22306
	528	0.72799	0.773671	0.947371	0.944842	0.989468	1.03371	1.25028
	527	0.742861	0.790959	0.968841	0.966177	1.01126	1.05723	1.27763
	526	0.758187	0.808495	0.991016	0.988174	1.03317	1.08086	1.30542
	525	0.773688	0.826473	1.01362	1.01037	1.0556	1.10469	1.33258
	524	0.789344	0.844544	1.037	1.03293	1.07845	1.12892	1.36044
	523	0.805397	0.862856	1.06003	1.056	1.10138	1.15321	1.3882
	522	0.821649	0.881651	1.08357	1.07943	1.12488	1.17826	1.41633
	521	0.838226	0.900771	1.10728	1.10334	1.14832	1.20336	1.44527
	520	0.854904	0.920846	1.13318	1.12895	1.17387	1.22942	1.47333
	519	0.87204	0.940607	1.15802	1.15359	1.19823	1.2553	1.5021
	518	0.88942	0.960814	1.183	1.17856	1.22292	1.28155	1.53099
	517	0.906856	0.981187	1.20848	1.20374	1.24756	1.30804	1.56035
	516	0.924723	1.0017	1.23444	1.22928	1.27258	1.33465	1.59031
	515	0.942318	1.0224	1.26086	1.25471	1.2982	1.3609	1.62007
	514	0.96077	1.04377	1.28788	1.2808	1.32385	1.38802	1.64969
	513	0.97936	1.06539	1.31481	1.30715	1.34921	1.41476	1.67927
	512	0.998046	1.087	1.34213	1.3342	1.37477	1.44159	1.7078
	511	1.01732	1.10884	1.36949	1.36105	1.40133	1.46847	1.7366
	510	1.0366	1.13081	1.39742	1.38843	1.42793	1.4956	1.76686
	509	1.05584	1.15289	1.42536	1.41577	1.45436	1.52288	1.79644
	508	1.07524	1.17528	1.45431	1.44367	1.48022	1.55014	1.82588
	507	1.09485	1.19803	1.48253	1.47122	1.50661	1.57727	1.85491
	506	1.11475	1.22091	1.51126	1.49893	1.53289	1.60478	1.88351
	505	1.13486	1.24378	1.53978	1.52725	1.55914	1.63203	1.91118
	504	1.15491	1.26677	1.56898	1.55511	1.58544	1.65905	1.93899
	503	1.17522	1.28963	1.59805	1.58374	1.61191	1.68584	1.96654
	502	1.1953	1.31282	1.62734	1.61202	1.63825	1.71223	1.99332
	501	1.21505	1.3359	1.65669	1.64032	1.66422	1.73849	2.02014
	500	1.23545	1.35916	1.6858	1.66875	1.69067	1.765	2.04719
	499	1.2563	1.38256	1.7148	1.69669	1.71681	1.79127	2.07357
	498	1.27777	1.4061	1.74389	1.72508	1.74327	1.81717	2.10026
	497	1.30006	1.4299	1.77325	1.75326	1.76948	1.84353	2.12602
	496	1.32135	1.45368	1.80314	1.7823	1.79544	1.8697	2.1504
	495	1.34202	1.47751	1.83316	1.81126	1.82085	1.89633	2.17529
	494	1.36296	1.50141	1.86303	1.84053	1.84603	1.9211	2.19878
	493	1.38426	1.52524	1.89313	1.86926	1.87171	1.94665	2.22237
	492	1.40629	1.54923	1.92294	1.89792	1.89697	1.97161	2.245
	491	1.42825	1.57246	1.95299	1.92612	1.92193	1.9969	2.26723
	490	1.44988	1.59601	1.98258	1.95454	1.94681	2.02095	2.28935
	489	1.47161	1.61944	2.01255	1.98189	1.97145	2.04537	2.31175
	488	1.49315	1.64311	2.04188	2.00962	1.99635	2.06893	2.33205
	487	1.51409	1.66652	2.07088	2.03746	2.02023	2.09237	2.35243
	486	1.53537	1.6894	2.09928	2.06472	2.04357	2.115	2.37238
	485	1.5559	1.71244	2.12782	2.09271	2.06656	2.13706	2.39029
	484	1.57701	1.73523	2.15644	2.12053	2.08977	2.15926	2.40879
	483	1.59854	1.75821	2.18541	2.14816	2.11254	2.18073	2.42628
	482	1.61994	1.78044	2.21442	2.17482	2.13507	2.20227	2.44333
	481	1.64197	1.80326	2.2429	2.20154	2.15742	2.22343	2.46149
	480	1.66332	1.82527	2.27102	2.22775	2.17923	2.24425	2.4796
	479	1.68461	1.84744	2.29898	2.25398	2.20062	2.26457	2.49552
	478	1.706	1.86926	2.32645	2.27936	2.22132	2.28496	2.50986
	477	1.72715	1.89182	2.35376	2.3044	2.24123	2.3043	2.52301
	476	1.74765	1.91323	2.38145	2.33024	2.261	2.32358	2.53613
	475	1.76928	1.93474	2.40775	2.35555	2.2809	2.34132	2.54944
	474	1.78968	1.95609	2.43401	2.38087	2.30045	2.35914	2.56277
	473	1.80891	1.97741	2.46034	2.40486	2.31983	2.37692	2.57422
	472	1.82876	1.99864	2.48613	2.42876	2.33829	2.39556	2.58602
	471	1.84799	2.01902	2.51138	2.45237	2.35691	2.4121	2.59541
	470	1.86757	2.03897	2.53625	2.47585	2.37445	2.42797	2.6044
	469	1.88793	2.05854	2.56117	2.49898	2.39124	2.4435	2.61551
	468	1.90891	2.07797	2.58569	2.52198	2.4078	2.45917	2.62396
	467	1.92789	2.09754	2.60927	2.54449	2.42503	2.47446	2.63293
	466	1.94712	2.11663	2.63326	2.56669	2.44039	2.489	2.64069
	465	1.9665	2.13536	2.65723	2.58752	2.45567	2.5028	2.64696
	464	1.98509	2.15355	2.68064	2.60908	2.47038	2.51559	2.65403
	463	2.00402	2.1712	2.70273	2.62964	2.48524	2.52826	2.66159
	462	2.02198	2.18906	2.72442	2.65059	2.50007	2.5412	2.66722
	461	2.03915	2.20621	2.74516	2.67015	2.51319	2.55371	2.67269
	460	2.05671	2.22333	2.76657	2.69003	2.52582	2.56546	2.6782
	459	2.07475	2.23971	2.78757	2.70913	2.53821	2.57503	2.68179
	458	2.09194	2.25581	2.80763	2.72878	2.55038	2.58485	2.68646
	457	2.10852	2.27147	2.82719	2.74619	2.56207	2.59504	2.68952
	456	2.12467	2.28627	2.84583	2.76363	2.57303	2.60559	2.69126
	455	2.14026	2.30022	2.86449	2.78013	2.58309	2.61537	2.69412
	454	2.15531	2.31492	2.88237	2.79659	2.59389	2.6244	2.69665
	453	2.1694	2.32888	2.8999	2.81212	2.60469	2.63327	2.69851
	452	2.18358	2.34253	2.91692	2.82816	2.61368	2.64042	2.70094
	451	2.19801	2.35521	2.93429	2.84342	2.62218	2.64781	2.70064
	450	2.21231	2.36761	2.95136	2.8583	2.62991	2.65353	2.70029
	449	2.2274	2.37972	2.96735	2.87292	2.63755	2.65981	2.70088
	448	2.24123	2.39178	2.98136	2.8863	2.64624	2.66601	2.69928
	447	2.253	2.40347	2.99537	2.90016	2.65367	2.67209	2.70015
	446	2.26543	2.41438	3.00967	2.91382	2.66111	2.67788	2.69971
	445	2.27713	2.42574	3.02439	2.92672	2.66767	2.68338	2.69906
	444	2.2881	2.43681	3.03794	2.93828	2.67352	2.68753	2.69933
	443	2.3	2.44752	3.05178	2.94988	2.67868	2.69111	2.69744
	442	2.3116	2.45666	3.06455	2.96133	2.68332	2.69464	2.69606
	441	2.32346	2.46562	3.07695	2.97303	2.68827	2.69803	2.69345
	440	2.3362	2.47462	3.08853	2.98332	2.6932	2.70251	2.69045
	439	2.34687	2.4838	3.10118	2.99365	2.69731	2.70647	2.68864
	438	2.35606	2.49249	3.11175	3.00396	2.70249	2.71014	2.68611
	437	2.36483	2.50129	3.12346	3.01446	2.70687	2.71221	2.6846
	436	2.37193	2.50912	3.13412	3.02478	2.71065	2.71444	2.68016
	435	2.37942	2.5176	3.14532	3.03454	2.71443	2.71604	2.67663
	434	2.38891	2.5241	3.1546	3.04308	2.71643	2.71867	2.67392
	433	2.39771	2.53086	3.16484	3.05106	2.71868	2.72112	2.67088
	432	2.4073	2.53763	3.1731	3.05863	2.71999	2.72345	2.6701
	431	2.4171	2.54475	3.18125	3.06534	2.72257	2.72434	2.66722
	430	2.42468	2.55131	3.18897	3.07267	2.72584	2.72595	2.66416
	429	2.4313	2.55633	3.19757	3.07959	2.72802	2.72573	2.6591
	428	2.43701	2.5617	3.20485	3.08744	2.72967	2.72486	2.65608
	427	2.44279	2.56629	3.21095	3.09478	2.73053	2.72303	2.65194
	426	2.44881	2.57107	3.2164	3.10001	2.73084	2.72269	2.64777
	425	2.45574	2.57523	3.22218	3.10488	2.73109	2.72279	2.64264
	424	2.45992	2.57938	3.22874	3.10838	2.73095	2.7233	2.63275
	423	2.46573	2.58323	3.23391	3.11336	2.7304	2.7234	2.62695
	422	2.47035	2.58673	3.23985	3.11892	2.73026	2.72102	2.61985
	421	2.47274	2.59152	3.245	3.12373	2.72979	2.7197	2.61546
	420	2.48188	2.59644	3.25703	3.1313	2.73133	2.72501	2.6119
	419	2.48746	2.60061	3.26284	3.1364	2.73087	2.72365	2.60866
	418	2.49022	2.60337	3.2683	3.14031	2.73097	2.72258	2.60405
	417	2.49338	2.60699	3.27257	3.14502	2.73237	2.72091	2.60001
	416	2.49825	2.60891	3.27675	3.14865	2.73141	2.71816	2.59613
	415	2.50131	2.61221	3.28016	3.1536	2.73081	2.71627	2.58982
	414	2.50624	2.61522	3.28404	3.15866	2.72916	2.7145	2.58393
	413	2.50995	2.61915	3.28956	3.16148	2.72816	2.71273	2.5809
	412	2.51168	2.6212	3.29363	3.16454	2.7268	2.71179	2.5767
	411	2.51462	2.62363	3.2979	3.16604	2.72531	2.71137	2.57505
	410	2.51753	2.62462	3.30124	3.16921	2.72367	2.7103	2.57118
	409	2.51773	2.62476	3.30293	3.17128	2.72172	2.70876	2.56531
	408	2.51974	2.62575	3.30528	3.17393	2.72155	2.70538	2.5579
	407	2.52072	2.6278	3.30738	3.17766	2.7197	2.70248	2.55065
	406	2.52348	2.6283	3.31101	3.18065	2.71825	2.7013	2.5445
	405	2.52685	2.62922	3.31412	3.18267	2.71572	2.69859	2.53975
	404	2.52689	2.63031	3.31612	3.18537	2.71455	2.69755	2.53542
	403	2.53084	2.63025	3.31995	3.18613	2.71291	2.69356	2.53173
	402	2.53089	2.63156	3.31961	3.18552	2.71162	2.69085	2.52703
	401	2.53203	2.63295	3.3218	3.18603	2.70778	2.68747	2.52173
	400	2.53492	2.63352	3.3205	3.18457	2.70454	2.68457	2.51643
	399	2.53249	2.63342	3.32156	3.18669	2.70177	2.68296	2.51038
	398	2.53411	2.63303	3.32306	3.18617	2.69817	2.67886	2.50557
	397	2.53222	2.63246	3.32308	3.18892	2.69596	2.67579	2.50032
	396	2.53365	2.63333	3.32397	3.18748	2.69331	2.67448	2.49651
	395	2.53504	2.63159	3.323	3.18756	2.69106	2.67329	2.49095
	394	2.53303	2.63053	3.32426	3.1857	2.68838	2.6699	2.48488
	393	2.53641	2.62956	3.32589	3.18524	2.68341	2.66497	2.47883
	392	2.53677	2.62747	3.32746	3.18603	2.67942	2.66143	2.47312
	391	2.53427	2.62665	3.3255	3.18524	2.67716	2.65823	2.46923
	390	2.531	2.62463	3.32354	3.18493	2.67399	2.65518	2.4629
	389	2.52751	2.62461	3.3227	3.18486	2.66992	2.65249	2.45907
	388	2.52364	2.62565	3.32243	3.18277	2.66521	2.65017	2.45441
	387	2.52269	2.62622	3.32146	3.18336	2.66038	2.64521	2.44702
	386	2.52582	2.62293	3.3215	3.18294	2.65688	2.64236	2.44198
	385	2.5245	2.62046	3.32094	3.18101	2.65294	2.63822	2.43652
	384	2.52391	2.61695	3.3203	3.17966	2.64818	2.63373	2.42912
	383	2.52363	2.61571	3.32055	3.17698	2.64585	2.62863	2.42413
	382	2.51904	2.61393	3.31936	3.17563	2.64201	2.6243	2.41572
	381	2.51626	2.61258	3.31903	3.17331	2.63875	2.62173	2.40947
	380	2.51733	2.61095	3.31657	3.16969	2.63393	2.61876	2.40354
	379	2.51773	2.60871	3.31398	3.17055	2.63016	2.61485	2.39926
	378	2.51924	2.60544	3.31312	3.17049	2.62663	2.60968	2.39519
	377	2.51807	2.6026	3.31119	3.17024	2.62129	2.60522	2.38809
	376	2.51571	2.60022	3.3107	3.16841	2.6169	2.60184	2.38304
	375	2.51153	2.5974	3.30958	3.16595	2.61129	2.59589	2.37317
	374	2.50785	2.59503	3.30805	3.16585	2.6074	2.59159	2.36963
	373	2.50729	2.59209	3.30443	3.16332	2.60319	2.58738	2.36407
	372	2.50367	2.59003	3.30213	3.16427	2.59939	2.58301	2.35678
	371	2.50179	2.58846	3.30159	3.16192	2.59583	2.57832	2.35009
	370	2.48884	2.58547	3.30446	3.15856	2.58002	2.57248	2.35223
	369	2.48563	2.58118	3.30274	3.15326	2.57577	2.56776	2.34054
	368	2.48302	2.57923	3.299	3.14976	2.56961	2.56176	2.33188
	367	2.4825	2.57766	3.29544	3.1478	2.56669	2.55518	2.32244
	366	2.48294	2.57499	3.29422	3.14513	2.56076	2.55128	2.31969
	365	2.48491	2.57173	3.29103	3.1424	2.556	2.54797	2.31505
	364	2.48546	2.56794	3.28594	3.14001	2.55139	2.54177	2.31137
	363	2.48478	2.56455	3.28385	3.13503	2.54837	2.53802	2.30962
	362	2.48355	2.56273	3.28148	3.13175	2.54463	2.53373	2.30451
	361	2.47772	2.55857	3.28039	3.12947	2.54034	2.53206	2.29562
	360	2.47471	2.55532	3.27963	3.12869	2.53623	2.52581	2.2844
	359	2.47194	2.55105	3.28113	3.1266	2.5273	2.52031	2.28078
	358	2.47006	2.54795	3.27579	3.12422	2.52482	2.5152	2.27156
	357	2.46949	2.54277	3.26995	3.11962	2.52065	2.50964	2.26536
	356	2.46336	2.54028	3.26301	3.11732	2.51728	2.50639	2.26
	355	2.45669	2.53756	3.26135	3.11598	2.51074	2.5017	2.25025
	354	2.44679	2.53632	3.26126	3.11346	2.50191	2.49744	2.2406
	353	2.4395	2.52953	3.26085	3.1125	2.49671	2.49102	2.23314
	352	2.43371	2.5268	3.25793	3.11087	2.49018	2.48499	2.22588
	351	2.43473	2.52147	3.2521	3.10804	2.48415	2.47988	2.21919
	350	2.44026	2.51759	3.24734	3.10828	2.47786	2.47408	2.21852
	349	2.43931	2.51364	3.24064	3.10329	2.47336	2.46781	2.21447
	348	2.44079	2.50681	3.24216	3.09908	2.46574	2.46538	2.21439
	347	2.43108	2.50193	3.24192	3.0928	2.46299	2.46219	2.21289
	346	2.422	2.49841	3.2389	3.08919	2.46059	2.45797	2.20357
	345	2.41853	2.49404	3.23626	3.08557	2.45305	2.45368	2.19554
	344	2.41258	2.49089	3.23369	3.07989	2.44506	2.44745	2.18708
	343	2.40906	2.48325	3.23182	3.07464	2.43765	2.44159	2.17904
	342	2.40675	2.4792	3.22688	3.07246	2.42933	2.43496	2.17585
	341	2.39986	2.4765	3.2226	3.07258	2.42457	2.42998	2.17195
	340	2.39832	2.47659	3.22347	3.07155	2.4155	2.43122	2.17667
	339	2.39121	2.46977	3.21768	3.07014	2.41103	2.42558	2.1612
	338	2.38637	2.4658	3.21368	3.06845	2.40192	2.41832	2.15406
	337	2.38039	2.46062	3.21107	3.06163	2.39273	2.4108	2.14815
	336	2.37592	2.45552	3.20918	3.05271	2.38886	2.40465	2.14496
	335	2.37157	2.44945	3.20689	3.05107	2.38472	2.3973	2.14362
	334	2.37019	2.44344	3.20342	3.04545	2.37983	2.39044	2.13804
	333	2.36829	2.43764	3.19927	3.04164	2.37282	2.38432	2.13594
	332	2.36322	2.42972	3.19544	3.03849	2.36189	2.3783	2.13043
	331	2.35755	2.42428	3.18902	3.03324	2.35278	2.37483	2.12476
	330	2.3489	2.41782	3.18154	3.03115	2.34461	2.3689	2.11865
	329	2.33912	2.41281	3.17077	3.02448	2.3375	2.36012	2.10713
	328	2.33408	2.40662	3.1675	3.0169	2.33152	2.35395	2.0987
	327	2.33064	2.40109	3.16121	3.01021	2.32114	2.34535	2.08753
	326	2.32521	2.39577	3.15821	3.00418	2.31127	2.34048	2.07913
	325	2.32167	2.38974	3.15403	2.99818	2.30213	2.33457	2.07136
	324	2.31775	2.38058	3.14671	2.99556	2.29462	2.32703	2.06554
	323	2.30805	2.37252	3.14089	2.9907	2.28674	2.3213	2.05812
	322	2.30161	2.36654	3.13581	2.98587	2.27965	2.31322	2.05227
	321	2.29887	2.36059	3.13084	2.97796	2.27459	2.30548	2.04813
	320	2.28843	2.35442	3.12297	2.97092	2.26795	2.30034	2.04078
	319	2.28571	2.34642	3.1154	2.96414	2.25975	2.29416	2.03604
	318	2.28006	2.33983	3.10899	2.95744	2.25046	2.28778	2.02967
	317	2.2689	2.33382	3.10293	2.95306	2.2405	2.27856	2.02078
	316	2.26879	2.32582	3.09985	2.94547	2.2326	2.27119	2.01443
	315	2.26255	2.31765	3.09443	2.93991	2.2248	2.26276	2.00622
	314	2.25279	2.30914	3.08614	2.93367	2.21595	2.25627	1.999
	313	2.25004	2.30276	3.07777	2.92937	2.20611	2.25035	1.99022
	312	2.24105	2.29709	3.07012	2.9213	2.19855	2.24627	1.97976
	311	2.23668	2.29108	3.06486	2.91145	2.19028	2.23974	1.97311
	310	2.23342	2.28466	3.0571	2.90402	2.18375	2.23095	1.96771
	309	2.22527	2.27676	3.04865	2.89597	2.17432	2.22433	1.96569
	308	2.22241	2.27145	3.04205	2.88831	2.16565	2.2175	1.95873
	307	2.21326	2.26305	3.03606	2.88101	2.15828	2.20873	1.95171
	306	2.20963	2.25575	3.02794	2.87101	2.1502	2.20045	1.94467
	305	2.20825	2.2467	3.02135	2.86249	2.14318	2.19262	1.93612
	304	2.20317	2.24223	3.01342	2.85387	2.13499	2.18716	1.9322
	303	2.19968	2.2343	3.00839	2.84458	2.12495	2.17989	1.92755
	302	2.19481	2.22677	3.00289	2.83825	2.11541	2.17501	1.91911
	301	2.18702	2.21937	2.99605	2.83095	2.10815	2.16677	1.91087
	300	2.17373	2.21302	2.98632	2.82619	2.1021	2.15967	1.90192
	299	2.17048	2.20621	2.97825	2.81743	2.09364	2.15455	1.89508
	298	2.16409	2.19692	2.96972	2.81049	2.08202	2.14606	1.88626
	297	2.15734	2.19251	2.95708	2.80044	2.0742	2.13803	1.88065
	296	2.15396	2.18306	2.94866	2.79193	2.06328	2.12848	1.87248
	295	2.14408	2.17622	2.93733	2.78126	2.05706	2.12043	1.85932
	294	2.13564	2.16793	2.92764	2.76997	2.04925	2.11151	1.8506
	293	2.12943	2.15759	2.92124	2.75695	2.04228	2.10197	1.84404
	292	2.12146	2.14922	2.91149	2.74848	2.03467	2.09277	1.83759
	291	2.11197	2.13928	2.90135	2.73458	2.02233	2.08347	1.83328
	290	2.10378	2.13231	2.88917	2.72509	2.01156	2.07475	1.82185
	289	2.09381	2.12185	2.87771	2.71315	2.00319	2.06761	1.8093
	288	2.08897	2.11587	2.86948	2.70355	1.99512	2.06011	1.80257
	287	2.08345	2.1096	2.86291	2.6949	1.98771	2.05163	1.79101
	286	2.07662	2.10201	2.85598	2.6893	1.97946	2.04157	1.78408
	285	2.07151	2.09431	2.84605	2.68121	1.97371	2.03411	1.77728
	284	2.06193	2.08648	2.84085	2.6766	1.96775	2.02576	1.76611
	283	2.05419	2.08077	2.83502	2.66786	1.96225	2.02103	1.75894
	282	2.04435	2.07432	2.82596	2.66382	1.95619	2.01206	1.75101
	281	2.03865	2.06661	2.81795	2.65788	1.94908	2.00458	1.74476
	280	2.03075	2.05888	2.81157	2.65198	1.94122	1.99378	1.73737
	279	2.02161	2.05143	2.80607	2.6424	1.93449	1.98757	1.72984
	278	2.01783	2.04452	2.79908	2.63633	1.92663	1.9801	1.7249
	277	2.00681	2.03721	2.79304	2.63057	1.91939	1.97401	1.71567
	276	1.99887	2.03066	2.78822	2.62399	1.91011	1.96736	1.71111
	275	1.99251	2.02366	2.78414	2.61541	1.90358	1.95923	1.70261
	274	1.98664	2.01841	2.77907	2.6045	1.89389	1.95299	1.6952
	273	1.9792	2.00762	2.77227	2.59558	1.88655	1.9456	1.68673
	272	1.9722	1.99875	2.76596	2.58692	1.878	1.93881	1.67759
	271	1.9656	1.98858	2.75937	2.57941	1.86774	1.9293	1.67331
	270	1.95377	1.98144	2.75159	2.57286	1.85923	1.92171	1.66432
	269	1.94638	1.97046	2.74524	2.56829	1.85129	1.91328	1.65737
	268	1.94151	1.96239	2.74033	2.56098	1.84357	1.90637	1.64831
	267	1.93094	1.95389	2.73144	2.55391	1.83537	1.89836	1.63555
	266	1.92342	1.94846	2.72455	2.54495	1.82591	1.89063	1.62477
	265	1.91098	1.93844	2.71813	2.53774	1.81539	1.88194	1.61432
	264	1.90005	1.92822	2.71159	2.52477	1.80676	1.87299	1.60587
	263	1.89222	1.91871	2.70277	2.51689	1.79827	1.86484	1.59853
	262	1.88133	1.91362	2.69613	2.50548	1.79096	1.8553	1.59346
	261	1.87691	1.90441	2.68763	2.49636	1.78163	1.84679	1.58596
	260	1.86864	1.89614	2.68003	2.48917	1.77281	1.8386	1.5738
	259	1.85935	1.88491	2.66739	2.47965	1.76335	1.82996	1.56358
	258	1.85184	1.87494	2.65717	2.47019	1.75305	1.82063	1.55302
	257	1.84101	1.86356	2.6496	2.45685	1.74351	1.81298	1.54085
	256	1.8284	1.84948	2.64211	2.44376	1.73079	1.80333	1.53412
	255	1.81905	1.83868	2.63002	2.42848	1.72022	1.79328	1.52504
	254	1.80496	1.82638	2.61567	2.41564	1.70852	1.77896	1.51381
	253	1.79235	1.81325	2.60193	2.39789	1.69669	1.76864	1.50382
	252	1.78232	1.79854	2.58875	2.38457	1.68517	1.75587	1.49215
	251	1.76638	1.78802	2.5714	2.36709	1.67204	1.74491	1.48028
	250	1.75485	1.77293	2.55329	2.35187	1.65661	1.73105	1.46769
	249	1.73861	1.75644	2.53679	2.33444	1.64085	1.71945	1.4558
	248	1.72768	1.73836	2.52331	2.31771	1.62614	1.70604	1.44238
	247	1.71751	1.72235	2.50785	2.30311	1.61067	1.69243	1.42692
	246	1.70579	1.70645	2.49247	2.28508	1.59081	1.67991	1.41586
	245	1.69466	1.69016	2.47389	2.26698	1.57238	1.66591	1.405
	244	1.67414	1.67319	2.45612	2.24949	1.55581	1.65195	1.39117
	243	1.65561	1.65824	2.43643	2.22964	1.53907	1.63716	1.37931
	242	1.6352	1.64149	2.41609	2.20904	1.52237	1.62156	1.36449
	241	1.61979	1.62312	2.4011	2.19039	1.50354	1.60658	1.35128
	240	1.60814	1.60566	2.38549	2.17131	1.48734	1.59324	1.33698
	239	1.59158	1.58761	2.3663	2.15135	1.47031	1.57898	1.32665
	238	1.5772	1.56826	2.34707	2.12764	1.45173	1.56224	1.30934
	237	1.56339	1.54979	2.32209	2.1004	1.42651	1.54379	1.29064
	236	1.54305	1.52638	2.29414	2.07016	1.40168	1.5269	1.2718
	235	1.52757	1.50017	2.26146	2.03892	1.37512	1.5087	1.25309
	234	1.50791	1.47283	2.22995	2.0134	1.34827	1.48677	1.23487
	233	1.48259	1.44957	2.19833	1.98218	1.32004	1.46491	1.21559
	232	1.46266	1.42769	2.16657	1.95046	1.29467	1.44429	1.19596
	231	1.43489	1.41188	2.13599	1.91531	1.27217	1.42735	1.1725
	230	1.41275	1.39883	2.11339	1.88465	1.25164	1.41333	1.15276
	229	1.39647	1.38862	2.08716	1.86121	1.23448	1.40292	1.13518
	228	1.38169	1.38209	2.0638	1.84114	1.21839	1.39419	1.12373
	227	1.37237	1.37627	2.04597	1.82055	1.20489	1.38855	1.11243
	226	1.36239	1.37584	2.02905	1.80745	1.19493	1.3833	1.10358
	225	1.35513	1.3748	2.02123	1.796	1.18687	1.37516	1.09368
	224	1.3483	1.37816	2.01089	1.78962	1.18226	1.37083	1.08417
	223	1.34168	1.38647	2.00751	1.78105	1.18281	1.37035	1.08228
	222	1.3481	1.4022	2.00428	1.78096	1.18606	1.37464	1.08242
	221	1.34956	1.41694	2.00219	1.78035	1.19377	1.38084	1.08676
	220	1.3549	1.43058	2.00888	1.78713	1.20195	1.39058	1.09124
	219	1.36377	1.44441	2.01767	1.79008	1.20523	1.39921	1.09046
	218	1.36839	1.46548	2.02944	1.79498	1.21207	1.40789	1.09063
	217	1.38177	1.48431	2.03753	1.79817	1.21552	1.41464	1.09179
	216	1.38948	1.50016	2.03996	1.79867	1.22446	1.42089	1.08862
	215	1.40199	1.51113	2.04208	1.79712	1.22674	1.42197	1.0879
	214	1.40447	1.51721	2.04198	1.79285	1.22875	1.42222	1.0894
	213	1.399	1.5296	2.03504	1.78358	1.23106	1.42096	1.0825
	212	1.39777	1.5395	2.02529	1.77571	1.23234	1.41996	1.08058
	211	1.39645	1.54582	2.01183	1.75586	1.2276	1.41641	1.0717
	210	1.38904	1.54543	1.99306	1.73715	1.21942	1.41205	1.05821
	209	1.38373	1.5374	1.97258	1.71909	1.20889	1.40358	1.05961
	208	1.38052	1.52842	1.94078	1.70261	1.20161	1.39041	1.05081
	207	1.37267	1.51098	1.91169	1.67661	1.18854	1.37763	1.05116
	206	1.36404	1.49667	1.87354	1.64104	1.17142	1.35989	1.03589
	205	1.34324	1.47622	1.81997	1.60955	1.14142	1.34247	1.00566
	204	1.31622	1.45502	1.76627	1.56792	1.11002	1.31598	0.977377
	203	1.27627	1.41485	1.69464	1.52043	1.06584	1.28525	0.941519
	202	1.23867	1.3785	1.63778	1.46643	1.02925	1.24543	0.918902
	201	1.19133	1.34303	1.58136	1.41324	0.989554	1.20905	0.887653
	200	1.14028	1.32501	1.52713	1.3657	0.956143	1.17408	0.865155

## Sheet: Figure 4
	Synthesis temperature / K	Oxygen evoltuion rate / µmolh-1
	973	116
	1023	311
	1073	383
	1123	460
	1173	601
	1223	247

## Sheet: Figure 5
	diffuse reflectance spectrum			Dependance of AQY
	Wavelength / nm	Kubelka-Munk Function / -		Wavelength / nm	AQY
	1500	0.00850025		420	11.891
	1499	0.00848454		460	7.503
	1498	0.0084715		500	3.3001
	1497	0.00846931		520	2.764
	1496	0.00846701		560	1.2
	1495	0.00846846		600	0
	1494	0.00846626
	1493	0.00847886
	1492	0.00849651
	1491	0.00850269
	1490	0.00849298
	1489	0.00848386
	1488	0.00847793
	1487	0.00846811
	1486	0.0084818
	1485	0.00847006
	1484	0.00846926
	1483	0.00844948
	1482	0.00845399
	1481	0.00845523
	1480	0.00845933
	1479	0.00847407
	1478	0.00847362
	1477	0.00847288
	1476	0.0084749
	1475	0.00846925
	1474	0.00849086
	1473	0.0084763
	1472	0.00847354
	1471	0.00844291
	1470	0.00846929
	1469	0.008488
	1468	0.00848703
	1467	0.00846997
	1466	0.00844714
	1465	0.00843922
	1464	0.00840612
	1463	0.00841998
	1462	0.00843155
	1461	0.00844291
	1460	0.0084456
	1459	0.00841532
	1458	0.00840452
	1457	0.00839876
	1456	0.00842664
	1455	0.00842893
	1454	0.00844732
	1453	0.00842899
	1452	0.00841705
	1451	0.00840903
	1450	0.00838348
	1449	0.00837716
	1448	0.00835312
	1447	0.00835401
	1446	0.00835213
	1445	0.00836478
	1444	0.0083806
	1443	0.00838305
	1442	0.00838619
	1441	0.00838342
	1440	0.00838244
	1439	0.00837335
	1438	0.00836894
	1437	0.00837871
	1436	0.00836824
	1435	0.008377
	1434	0.00838288
	1433	0.00839185
	1432	0.00839363
	1431	0.00838973
	1430	0.00837726
	1429	0.00839106
	1428	0.00838492
	1427	0.00839928
	1426	0.00839458
	1425	0.00841994
	1424	0.00839966
	1423	0.00841658
	1422	0.00843525
	1421	0.00846156
	1420	0.00847081
	1419	0.00846634
	1418	0.00848498
	1417	0.00850317
	1416	0.00853707
	1415	0.008553
	1414	0.00859391
	1413	0.00860345
	1412	0.00863951
	1411	0.00864919
	1410	0.00867148
	1409	0.00872373
	1408	0.00876922
	1407	0.00882512
	1406	0.00885676
	1405	0.00889908
	1404	0.00893087
	1403	0.00899089
	1402	0.00903617
	1401	0.00909656
	1400	0.0091445
	1399	0.00919397
	1398	0.00924329
	1397	0.00929088
	1396	0.00933528
	1395	0.00935876
	1394	0.00938671
	1393	0.00941298
	1392	0.00945696
	1391	0.0094494
	1390	0.00944053
	1389	0.00940684
	1388	0.00938437
	1387	0.00934797
	1386	0.00928425
	1385	0.00922568
	1384	0.00914435
	1383	0.00905775
	1382	0.00897457
	1381	0.00886923
	1380	0.00879097
	1379	0.00869521
	1378	0.00858997
	1377	0.00848971
	1376	0.00837837
	1375	0.00828884
	1374	0.00818699
	1373	0.00810594
	1372	0.00801448
	1371	0.00793724
	1370	0.00786858
	1369	0.00780912
	1368	0.00775136
	1367	0.00768643
	1366	0.007619
	1365	0.00757243
	1364	0.00753848
	1363	0.00749571
	1362	0.00746566
	1361	0.00743272
	1360	0.00740621
	1359	0.00738931
	1358	0.00735502
	1357	0.00733315
	1356	0.00730406
	1355	0.00730354
	1354	0.00728252
	1353	0.00725623
	1352	0.0072424
	1351	0.00724449
	1350	0.00725382
	1349	0.00724455
	1348	0.00724099
	1347	0.00722877
	1346	0.00721942
	1345	0.00720349
	1344	0.00719766
	1343	0.00718247
	1342	0.00715869
	1341	0.00713036
	1340	0.0071261
	1339	0.00712838
	1338	0.00714054
	1337	0.00712061
	1336	0.00710363
	1335	0.00710105
	1334	0.00709774
	1333	0.0070847
	1332	0.00706892
	1331	0.00707023
	1330	0.00706401
	1329	0.0070562
	1328	0.00704062
	1327	0.00702598
	1326	0.00701438
	1325	0.00700574
	1324	0.00698527
	1323	0.00697661
	1322	0.00696631
	1321	0.00696495
	1320	0.0069634
	1319	0.00693879
	1318	0.00691855
	1317	0.00692537
	1316	0.00691587
	1315	0.00692331
	1314	0.00691365
	1313	0.00690521
	1312	0.00690129
	1311	0.0068874
	1310	0.00687116
	1309	0.00685931
	1308	0.00685284
	1307	0.00685565
	1306	0.00684801
	1305	0.00684152
	1304	0.0068319
	1303	0.00682912
	1302	0.00682541
	1301	0.0068156
	1300	0.00680547
	1299	0.00677806
	1298	0.00677235
	1297	0.00676732
	1296	0.00678137
	1295	0.00677208
	1294	0.00676491
	1293	0.00674627
	1292	0.00674063
	1291	0.00672629
	1290	0.00673455
	1289	0.00673144
	1288	0.0067297
	1287	0.00672423
	1286	0.00671108
	1285	0.00669404
	1284	0.00668064
	1283	0.00666404
	1282	0.00666259
	1281	0.00665897
	1280	0.00666174
	1279	0.00664711
	1278	0.00665
	1277	0.00664535
	1276	0.00664769
	1275	0.00664648
	1274	0.00663673
	1273	0.00664516
	1272	0.00663191
	1271	0.00662705
	1270	0.00662027
	1269	0.00662181
	1268	0.00660168
	1267	0.00658808
	1266	0.00657781
	1265	0.00658227
	1264	0.00658521
	1263	0.00657807
	1262	0.00657609
	1261	0.00655952
	1260	0.00656832
	1259	0.0065629
	1258	0.00656277
	1257	0.00656322
	1256	0.00655201
	1255	0.00654902
	1254	0.00654017
	1253	0.0065362
	1252	0.0065238
	1251	0.00650632
	1250	0.00651177
	1249	0.00650744
	1248	0.00651795
	1247	0.00649983
	1246	0.00648668
	1245	0.00647283
	1244	0.00646424
	1243	0.00645543
	1242	0.00644755
	1241	0.0064435
	1240	0.00642919
	1239	0.00641275
	1238	0.00638799
	1237	0.0063932
	1236	0.00639325
	1235	0.00639158
	1234	0.00638262
	1233	0.00636893
	1232	0.006363
	1231	0.00634949
	1230	0.00634254
	1229	0.00633782
	1228	0.00633331
	1227	0.00632635
	1226	0.00631273
	1225	0.00629467
	1224	0.00627987
	1223	0.00627317
	1222	0.00627137
	1221	0.00626681
	1220	0.00625953
	1219	0.00624714
	1218	0.00624665
	1217	0.00623551
	1216	0.00623378
	1215	0.00622173
	1214	0.00621562
	1213	0.00620819
	1212	0.00620657
	1211	0.00619997
	1210	0.00619906
	1209	0.00618128
	1208	0.00617652
	1207	0.00615448
	1206	0.00615272
	1205	0.00614406
	1204	0.00614278
	1203	0.00613415
	1202	0.00613203
	1201	0.0061336
	1200	0.0061233
	1199	0.00613048
	1198	0.00611344
	1197	0.00610766
	1196	0.00608977
	1195	0.00608414
	1194	0.00608067
	1193	0.00608467
	1192	0.00607743
	1191	0.00607218
	1190	0.00606181
	1189	0.00604518
	1188	0.00604626
	1187	0.00604164
	1186	0.00604106
	1185	0.00603267
	1184	0.0060314
	1183	0.00601874
	1182	0.00602318
	1181	0.00600125
	1180	0.00600085
	1179	0.00598733
	1178	0.00598145
	1177	0.00597551
	1176	0.00595797
	1175	0.00595561
	1174	0.00594558
	1173	0.00594157
	1172	0.00593819
	1171	0.00594153
	1170	0.00592256
	1169	0.00591132
	1168	0.00589534
	1167	0.00590525
	1166	0.00590438
	1165	0.0059082
	1164	0.00589788
	1163	0.00589231
	1162	0.00588774
	1161	0.0058877
	1160	0.0058759
	1159	0.00586608
	1158	0.00584803
	1157	0.00584402
	1156	0.00583664
	1155	0.00584783
	1154	0.00584078
	1153	0.0058318
	1152	0.00581104
	1151	0.00580994
	1150	0.00580531
	1149	0.00579931
	1148	0.00579706
	1147	0.00577686
	1146	0.00578534
	1145	0.00577459
	1144	0.00577842
	1143	0.00576185
	1142	0.00575631
	1141	0.00574575
	1140	0.00574034
	1139	0.00573416
	1138	0.00573426
	1137	0.00572568
	1136	0.00571312
	1135	0.00570756
	1134	0.0057031
	1133	0.00570062
	1132	0.00569587
	1131	0.00568718
	1130	0.00568981
	1129	0.00568226
	1128	0.00567568
	1127	0.00566752
	1126	0.00566507
	1125	0.00565303
	1124	0.00565325
	1123	0.005637
	1122	0.00563469
	1121	0.00562069
	1120	0.0056163
	1119	0.00561409
	1118	0.00561355
	1117	0.0056073
	1116	0.00560123
	1115	0.00558711
	1114	0.00557476
	1113	0.00557205
	1112	0.00557451
	1111	0.00557862
	1110	0.00557026
	1109	0.00556123
	1108	0.0055577
	1107	0.0055566
	1106	0.00555159
	1105	0.00554109
	1104	0.00552709
	1103	0.00552352
	1102	0.00551081
	1101	0.00550443
	1100	0.00550266
	1099	0.00550822
	1098	0.00549802
	1097	0.00548634
	1096	0.00548129
	1095	0.00547655
	1094	0.00548422
	1093	0.00547711
	1092	0.00546318
	1091	0.00545648
	1090	0.00544064
	1089	0.00543204
	1088	0.00543022
	1087	0.00542742
	1086	0.0054378
	1085	0.00543304
	1084	0.00542623
	1083	0.00541755
	1082	0.00540857
	1081	0.00540448
	1080	0.00538771
	1079	0.00538348
	1078	0.00538328
	1077	0.0053725
	1076	0.00537271
	1075	0.00535772
	1074	0.00535993
	1073	0.00534635
	1072	0.00534371
	1071	0.00533572
	1070	0.00531915
	1069	0.00532229
	1068	0.00531998
	1067	0.00532078
	1066	0.00530887
	1065	0.00530136
	1064	0.00529304
	1063	0.00529369
	1062	0.00529351
	1061	0.00528832
	1060	0.0052661
	1059	0.00525887
	1058	0.00524914
	1057	0.00525068
	1056	0.00524377
	1055	0.00524363
	1054	0.00524206
	1053	0.00524549
	1052	0.00523824
	1051	0.00523446
	1050	0.0052251
	1049	0.00521548
	1048	0.0052078
	1047	0.00519385
	1046	0.00518719
	1045	0.00518004
	1044	0.00518891
	1043	0.00519137
	1042	0.00518185
	1041	0.0051748
	1040	0.00517354
	1039	0.0051664
	1038	0.0051579
	1037	0.00515135
	1036	0.00513443
	1035	0.00513261
	1034	0.00513407
	1033	0.00513355
	1032	0.00512796
	1031	0.00511695
	1030	0.00510927
	1029	0.00510701
	1028	0.00510831
	1027	0.00510086
	1026	0.0050913
	1025	0.00508386
	1024	0.00508431
	1023	0.00507548
	1022	0.00506483
	1021	0.00506022
	1020	0.00505141
	1019	0.00505318
	1018	0.00503556
	1017	0.00503728
	1016	0.00502747
	1015	0.00503418
	1014	0.00502589
	1013	0.00502546
	1012	0.00501574
	1011	0.00500991
	1010	0.00500326
	1009	0.00499838
	1008	0.00499463
	1007	0.0050005
	1006	0.00499979
	1005	0.00498832
	1004	0.00498106
	1003	0.004974
	1002	0.00496639
	1001	0.00496199
	1000	0.00495487
	999	0.00495324
	998	0.00494474
	997	0.00495059
	996	0.0049393
	995	0.00493939
	994	0.00493192
	993	0.00492538
	992	0.00491861
	991	0.00490646
	990	0.00489963
	989	0.00489792
	988	0.00490185
	987	0.00489897
	986	0.00489081
	985	0.00487562
	984	0.00487523
	983	0.00488324
	982	0.00487995
	981	0.00486138
	980	0.00485263
	979	0.0048559
	978	0.00485912
	977	0.00486176
	976	0.00485635
	975	0.00485533
	974	0.00484441
	973	0.00484071
	972	0.00483655
	971	0.00484048
	970	0.00483966
	969	0.00483129
	968	0.00482618
	967	0.00482464
	966	0.00482799
	965	0.00482627
	964	0.00481949
	963	0.00480836
	962	0.00480971
	961	0.00480423
	960	0.00480083
	959	0.00479381
	958	0.0047953
	957	0.00479282
	956	0.00477762
	955	0.00478787
	954	0.00477741
	953	0.00477828
	952	0.00476152
	951	0.00475866
	950	0.00475567
	949	0.00474785
	948	0.00475567
	947	0.00473966
	946	0.00474671
	945	0.00473957
	944	0.00473548
	943	0.00472445
	942	0.0047194
	941	0.00471241
	940	0.00470365
	939	0.00470446
	938	0.00470328
	937	0.00469859
	936	0.00468728
	935	0.00468553
	934	0.00467738
	933	0.00466699
	932	0.00465978
	931	0.0046524
	930	0.00464995
	929	0.00465837
	928	0.00464801
	927	0.0046513
	926	0.00464226
	925	0.00463759
	924	0.00462968
	923	0.00461663
	922	0.00462891
	921	0.00461267
	920	0.00462119
	919	0.00461543
	918	0.00462637
	917	0.00462029
	916	0.00462067
	915	0.00460098
	914	0.00460969
	913	0.00459709
	912	0.00460556
	911	0.00460034
	910	0.00459948
	909	0.0045977
	908	0.00459739
	907	0.00460308
	906	0.00459391
	905	0.00459007
	904	0.00458637
	903	0.00459302
	902	0.00459787
	901	0.00458902
	900	0.00458454
	899	0.00457262
	898	0.00457636
	897	0.00455872
	896	0.00457017
	895	0.00456556
	894	0.00458213
	893	0.0045955
	892	0.00459392
	891	0.00459897
	890	0.00458628
	889	0.00456253
	888	0.00456195
	887	0.0045748
	886	0.00457571
	885	0.00456232
	884	0.00456569
	883	0.00455268
	882	0.00455281
	881	0.00455133
	880	0.00456548
	879	0.00457161
	878	0.00457238
	877	0.004572
	876	0.00457689
	875	0.00458255
	874	0.00458847
	873	0.00458501
	872	0.00456789
	871	0.00457877
	870	0.00458404
	869	0.00459902
	868	0.00458887
	867	0.00458734
	866	0.00459472
	865	0.00459562
	864	0.00461079
	863	0.00459511
	862	0.00461732
	861	0.00461801
	860	0.00462208
	859	0.00464528
	858	0.00464845
	857	0.00464041
	856	0.00465094
	855	0.0046372
	854	0.00466172
	853	0.00466672
	852	0.00468952
	851	0.00469265
	850	0.00400057
	849	0.00407416
	848	0.00408334
	847	0.00408937
	846	0.0040087
	845	0.00402116
	844	0.00403366
	843	0.00409078
	842	0.00412361
	841	0.00411693
	840	0.00412401
	839	0.00408211
	838	0.0041109
	837	0.0041023
	836	0.00411951
	835	0.00414007
	834	0.00414064
	833	0.00416203
	832	0.00418671
	831	0.00422629
	830	0.00425188
	829	0.00422925
	828	0.00424362
	827	0.00423646
	826	0.00426284
	825	0.00426251
	824	0.00428497
	823	0.0043128
	822	0.00436562
	821	0.00438039
	820	0.00439659
	819	0.00442845
	818	0.00446056
	817	0.00449792
	816	0.00452507
	815	0.00454771
	814	0.00457145
	813	0.00460672
	812	0.00464119
	811	0.00467202
	810	0.00470688
	809	0.00473713
	808	0.00474497
	807	0.00477956
	806	0.00479097
	805	0.00484554
	804	0.00488668
	803	0.00492611
	802	0.00494575
	801	0.00498113
	800	0.00504594
	799	0.00510133
	798	0.00513882
	797	0.0051702
	796	0.00520586
	795	0.00526038
	794	0.00530194
	793	0.00535287
	792	0.00539492
	791	0.00544298
	790	0.0054895
	789	0.00553078
	788	0.00557198
	787	0.0056124
	786	0.00566105
	785	0.00569814
	784	0.0057416
	783	0.00580124
	782	0.00589143
	781	0.00597668
	780	0.0060443
	779	0.00610503
	778	0.00613572
	777	0.00619747
	776	0.00625105
	775	0.00632078
	774	0.00638057
	773	0.00646139
	772	0.00653393
	771	0.0066105
	770	0.0066776
	769	0.00673213
	768	0.00681195
	767	0.00686476
	766	0.00697557
	765	0.00704897
	764	0.00715583
	763	0.00724611
	762	0.00734065
	761	0.00740852
	760	0.00748985
	759	0.00759359
	758	0.00770291
	757	0.0078225
	756	0.00793366
	755	0.00803523
	754	0.00812878
	753	0.00823531
	752	0.00834649
	751	0.00845122
	750	0.00856051
	749	0.00866664
	748	0.00879344
	747	0.00892725
	746	0.00903861
	745	0.009147
	744	0.00924533
	743	0.00939218
	742	0.00953003
	741	0.00966136
	740	0.00982551
	739	0.00997152
	738	0.0101193
	737	0.0102379
	736	0.0103772
	735	0.0105071
	734	0.0106954
	733	0.0108409
	732	0.0109924
	731	0.0111463
	730	0.0113158
	729	0.0114883
	728	0.0116623
	727	0.0118205
	726	0.0119937
	725	0.0121651
	724	0.0123261
	723	0.0125077
	722	0.0126964
	721	0.0129085
	720	0.0131273
	719	0.0133113
	718	0.0135204
	717	0.0137175
	716	0.0139425
	715	0.0141557
	714	0.014386
	713	0.0146182
	712	0.0148236
	711	0.0150478
	710	0.0153003
	709	0.0155408
	708	0.0158327
	707	0.0160908
	706	0.016329
	705	0.0165695
	704	0.0168064
	703	0.0170939
	702	0.0173751
	701	0.0176558
	700	0.0179417
	699	0.0182349
	698	0.0185494
	697	0.0188569
	696	0.0191608
	695	0.019468
	694	0.0197877
	693	0.0201191
	692	0.0204752
	691	0.020822
	690	0.0211908
	689	0.0215516
	688	0.0218939
	687	0.0222716
	686	0.0226544
	685	0.0230641
	684	0.0234527
	683	0.0238071
	682	0.0241824
	681	0.0245594
	680	0.0249421
	679	0.0253531
	678	0.0257966
	677	0.0262543
	676	0.0267323
	675	0.02719
	674	0.0276686
	673	0.0281704
	672	0.0286883
	671	0.0292278
	670	0.0297902
	669	0.0303131
	668	0.0308604
	667	0.0314208
	666	0.0319974
	665	0.0326291
	664	0.0332608
	663	0.0339244
	662	0.0345655
	661	0.0352514
	660	0.0358876
	659	0.0366201
	658	0.0373425
	657	0.038079
	656	0.0388246
	655	0.0395602
	654	0.0403954
	653	0.041222
	652	0.0420675
	651	0.0429505
	650	0.0438185
	649	0.0447079
	648	0.0456287
	647	0.0465517
	646	0.0475225
	645	0.0484979
	644	0.0495751
	643	0.0506451
	642	0.0517553
	641	0.0528321
	640	0.0539491
	639	0.0551086
	638	0.0563103
	637	0.0575199
	636	0.0587917
	635	0.0600885
	634	0.0614533
	633	0.0628426
	632	0.0642169
	631	0.0656819
	630	0.0671576
	629	0.0686999
	628	0.0703388
	627	0.0719727
	626	0.073694
	625	0.0754151
	624	0.0772622
	623	0.0791007
	622	0.0809901
	621	0.0829596
	620	0.0850402
	619	0.0870786
	618	0.0892762
	617	0.0914176
	616	0.0936695
	615	0.0960148
	614	0.0984502
	613	0.101027
	612	0.103613
	611	0.106325
	610	0.109067
	609	0.111887
	608	0.114807
	607	0.117817
	606	0.12093
	605	0.124084
	604	0.127378
	603	0.130823
	602	0.134291
	601	0.137843
	600	0.141609
	599	0.145458
	598	0.149418
	597	0.153418
	596	0.157493
	595	0.161677
	594	0.165965
	593	0.170472
	592	0.175025
	591	0.179806
	590	0.184656
	589	0.189746
	588	0.194905
	587	0.200228
	586	0.205569
	585	0.211121
	584	0.216793
	583	0.222699
	582	0.228668
	581	0.234833
	580	0.241204
	579	0.247776
	578	0.254481
	577	0.261447
	576	0.268523
	575	0.275902
	574	0.283481
	573	0.291225
	572	0.299201
	571	0.307585
	570	0.316152
	569	0.324829
	568	0.333707
	567	0.342876
	566	0.352409
	565	0.362166
	564	0.37219
	563	0.382646
	562	0.393264
	561	0.404184
	560	0.415308
	559	0.426764
	558	0.438513
	557	0.450639
	556	0.462907
	555	0.475468
	554	0.488294
	553	0.50164
	552	0.515247
	551	0.529312
	550	0.543587
	549	0.558229
	548	0.57301
	547	0.588078
	546	0.603312
	545	0.619019
	544	0.635321
	543	0.652115
	542	0.669062
	541	0.686247
	540	0.703969
	539	0.722108
	538	0.740321
	537	0.758774
	536	0.777866
	535	0.797658
	534	0.817446
	533	0.837511
	532	0.857667
	531	0.878686
	530	0.899981
	529	0.921823
	528	0.944131
	527	0.966517
	526	0.989136
	525	1.01215
	524	1.03571
	523	1.05965
	522	1.08384
	521	1.10882
	520	1.13483
	519	1.16031
	518	1.18569
	517	1.21163
	516	1.23818
	515	1.26516
	514	1.29239
	513	1.31977
	512	1.34703
	511	1.37484
	510	1.40254
	509	1.4302
	508	1.45864
	507	1.48645
	506	1.51473
	505	1.5427
	504	1.57115
	503	1.60012
	502	1.62852
	501	1.65668
	500	1.68467
	499	1.71322
	498	1.74143
	497	1.76933
	496	1.79766
	495	1.82548
	494	1.85384
	493	1.88138
	492	1.90872
	491	1.93563
	490	1.96263
	489	1.98923
	488	2.01601
	487	2.042
	486	2.06732
	485	2.09277
	484	2.11761
	483	2.14298
	482	2.16719
	481	2.19124
	480	2.21474
	479	2.23824
	478	2.26146
	477	2.28461
	476	2.30721
	475	2.32957
	474	2.35104
	473	2.37205
	472	2.39232
	471	2.412
	470	2.43141
	469	2.45092
	468	2.46943
	467	2.48656
	466	2.50489
	465	2.52275
	464	2.5396
	463	2.55509
	462	2.57091
	461	2.58613
	460	2.60094
	459	2.61437
	458	2.62842
	457	2.64084
	456	2.65299
	455	2.66459
	454	2.6762
	453	2.68687
	452	2.69709
	451	2.70688
	450	2.7172
	449	2.7257
	448	2.7332
	447	2.73977
	446	2.74742
	445	2.75587
	444	2.76238
	443	2.76818
	442	2.77287
	441	2.77833
	440	2.78313
	439	2.78861
	438	2.79299
	437	2.79717
	436	2.80105
	435	2.80525
	434	2.80839
	433	2.81185
	432	2.81415
	431	2.8171
	430	2.81936
	429	2.82136
	428	2.82359
	427	2.82442
	426	2.82475
	425	2.82531
	424	2.82483
	423	2.82452
	422	2.8237
	421	2.82341
	420	2.82752
	419	2.82654
	418	2.82545
	417	2.82684
	416	2.82567
	415	2.82425
	414	2.8222
	413	2.82115
	412	2.81992
	411	2.81923
	410	2.81713
	409	2.81517
	408	2.81328
	407	2.81283
	406	2.81275
	405	2.81018
	404	2.80791
	403	2.80478
	402	2.80162
	401	2.80032
	400	2.79785
	399	2.79596
	398	2.79121
	397	2.78893
	396	2.78741
	395	2.78488
	394	2.77979
	393	2.77586
	392	2.77226
	391	2.7717
	390	2.76966
	389	2.76669
	388	2.76136
	387	2.75647
	386	2.75367
	385	2.74849
	384	2.74545
	383	2.74111
	382	2.73908
	381	2.73472
	380	2.73095
	379	2.72412
	378	2.71878
	377	2.71491
	376	2.70997
	375	2.70668
	374	2.69955
	373	2.696
	372	2.69252
	371	2.6877
	370	2.67846
	369	2.67332
	368	2.66749
	367	2.65985
	366	2.65803
	365	2.65225
	364	2.65058
	363	2.64403
	362	2.63887
	361	2.63439
	360	2.63106
	359	2.62421
	358	2.61502
	357	2.60799
	356	2.60408
	355	2.60278
	354	2.60102
	353	2.59502
	352	2.59
	351	2.58302
	350	2.57774
	349	2.5711
	348	2.56545
	347	2.56079
	346	2.55359
	345	2.55019
	344	2.54539
	343	2.5418
	342	2.53873
	341	2.53184
	340	2.52353
	339	2.51742
	338	2.51302
	337	2.50582
	336	2.49978
	335	2.49314
	334	2.4865
	333	2.48077
	332	2.4721
	331	2.46598
	330	2.46205
	329	2.45261
	328	2.44464
	327	2.43518
	326	2.42962
	325	2.4224
	324	2.41647
	323	2.40924
	322	2.40346
	321	2.39792
	320	2.39156
	319	2.38306
	318	2.37523
	317	2.36699
	316	2.36154
	315	2.35445
	314	2.34759
	313	2.34131
	312	2.33646
	311	2.32915
	310	2.32244
	309	2.31404
	308	2.30835
	307	2.29978
	306	2.29389
	305	2.28371
	304	2.27774
	303	2.27111
	302	2.26398
	301	2.25769
	300	2.24968
	299	2.24206
	298	2.23557
	297	2.22806
	296	2.21951
	295	2.20813
	294	2.19795
	293	2.18737
	292	2.17926
	291	2.17062
	290	2.16267
	289	2.15536
	288	2.14921
	287	2.139
	286	2.12971
	285	2.12325
	284	2.1166
	283	2.10924
	282	2.09959
	281	2.09108
	280	2.08303
	279	2.07768
	278	2.07163
	277	2.06469
	276	2.05691
	275	2.04698
	274	2.03756
	273	2.0289
	272	2.02177
	271	2.01262
	270	2.00429
	269	1.99732
	268	1.98978
	267	1.98348
	266	1.97599
	265	1.96767
	264	1.95873
	263	1.94803
	262	1.93995
	261	1.93083
	260	1.92191
	259	1.91123
	258	1.9005
	257	1.89047
	256	1.88077
	255	1.86893
	254	1.85963
	253	1.84576
	252	1.83179
	251	1.81732
	250	1.80394
	249	1.79326
	248	1.77983
	247	1.76401
	246	1.74899
	245	1.73328
	244	1.71955
	243	1.70362
	242	1.68801
	241	1.67174
	240	1.6547
	239	1.63914
	238	1.62212
	237	1.60322
	236	1.58142
	235	1.55926
	234	1.53769
	233	1.51493
	232	1.49101
	231	1.47063
	230	1.45257
	229	1.43858
	228	1.42362
	227	1.41327
	226	1.40457
	225	1.39658
	224	1.39109
	223	1.3871
	222	1.38777
	221	1.38714
	220	1.38912
	219	1.39254
	218	1.39326
	217	1.39157
	216	1.38864
	215	1.37814
	214	1.37159
	213	1.36567
	212	1.35473
	211	1.34401
	210	1.3244
	209	1.3039
	208	1.28746
	207	1.26817
	206	1.24721
	205	1.21854
	204	1.17503
	203	1.13639
	202	1.09093
	201	1.05149
	200	1.01344

## Sheet: Figure 8
		Z-scheme overall water splitting (closed squares)				Z-scheme overall water splitting (open circles)
	Time / h	H2	O2		Time / h	H2	O2
	0	0	0		0	0	0
	1	9.14888	4.36855		1	5.41622	2.26905
	2	16.5395	7.51348		2	9.17119	4.20232
	3	22.7365	10.8964		3	12.1982	5.3128
	4	27.2816	13.362		4	14.8852	6.56687
