# Supplementary material for: Long-wavelength photoresponsive gallium zinc oxynitride for efficient oxygen evolution and Z-scheme water splitting reactions
Source: Royal Society of Chemistry journal article supplement (doi:10.1039/d4ta03576c), 2024-01-01
Supplement: d4ta03576c2.pdf [file d4ta03576c2.pdf]

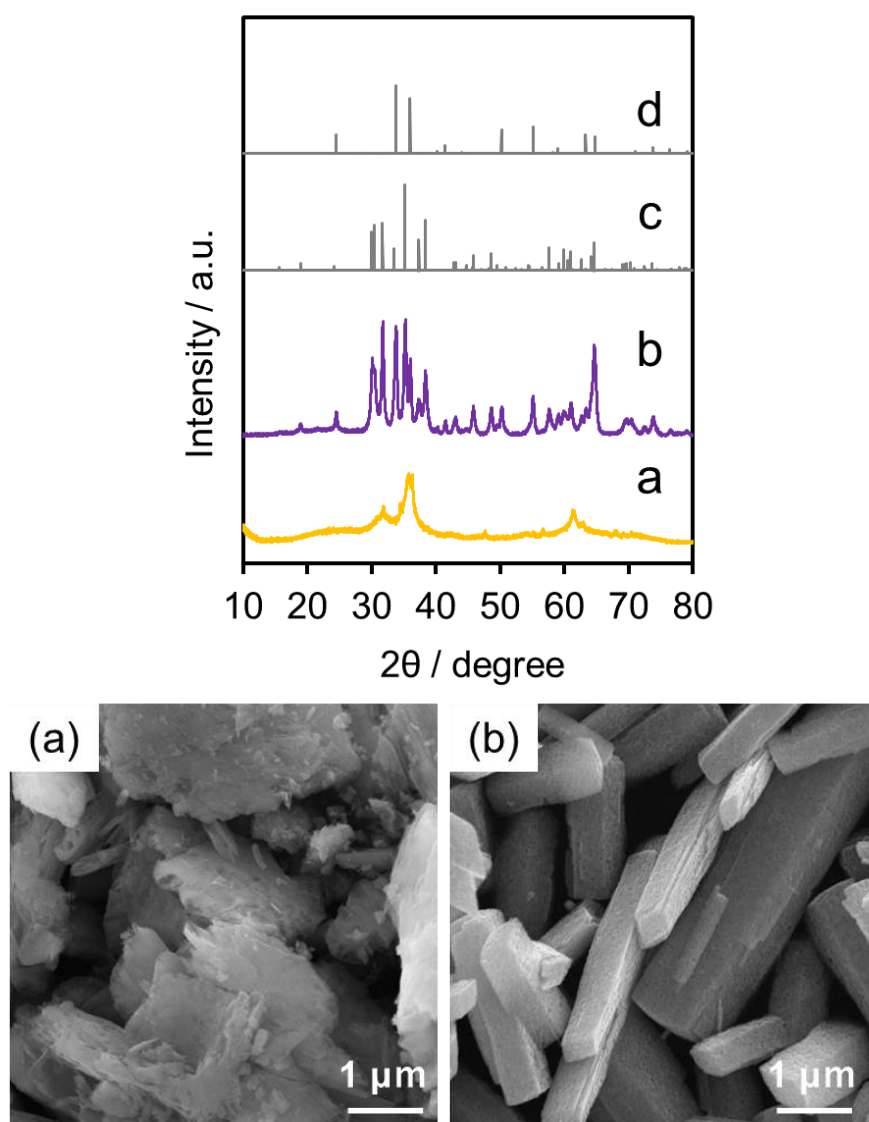

**Figure S1.** (A) XRD patterns and (B) SEM images for (a)  $\delta$ -Ga<sub>2</sub>O<sub>3</sub> and (b) K-Ga<sub>2</sub>O<sub>3</sub>. Reference XRD patterns for (c)  $\beta$ -Ga<sub>2</sub>O<sub>3</sub> (ICDD:00-041-1103) and (d)  $\alpha$ -Ga<sub>2</sub>O<sub>3</sub> (ICDD:01-074-1610) are also presented for comparison in panel (A).

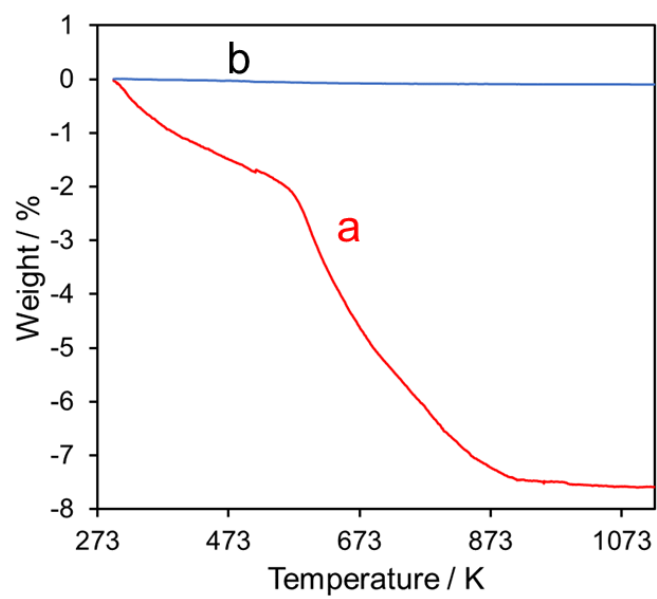

**Figure S2.** TGA profiles for (a)  $\delta$ -Ga<sub>2</sub>O<sub>3</sub> and (b) K-Ga<sub>2</sub>O<sub>3</sub>.

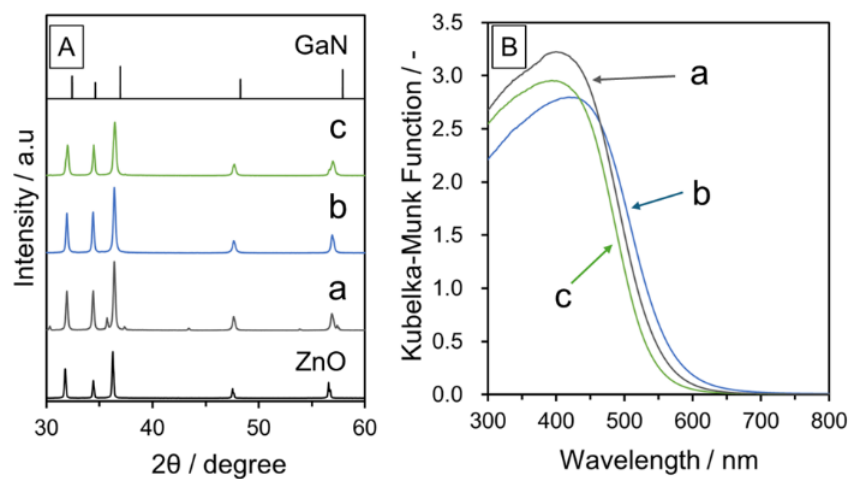

**Figure S3.** XRD and DRS results for GaN:ZnO( $\delta$ ) samples prepared (a) without addition of Zn, (b) with addition of Zn, and (c) with addition of submicron ZnO particles by heating at 1123 K for 10 h.

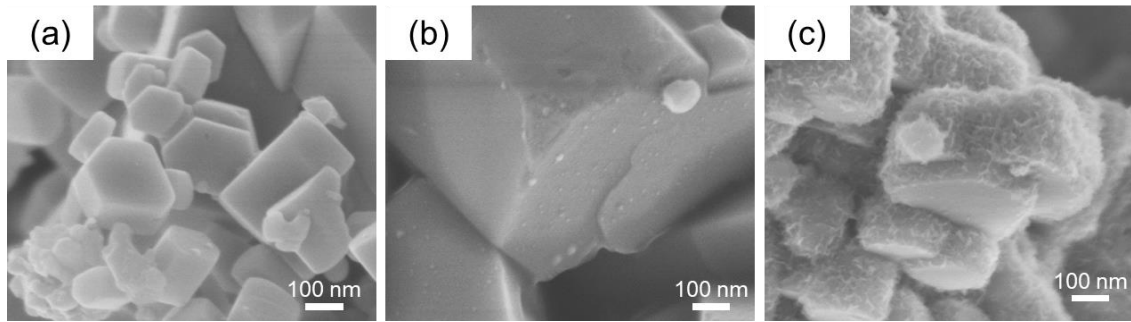

**Figure S4.** SEM images of (a) pristine GaN:ZnO and GaN:ZnO after (b) photodeposition of Pt and (c) additional photodeposition of MnO<sub>x</sub>.

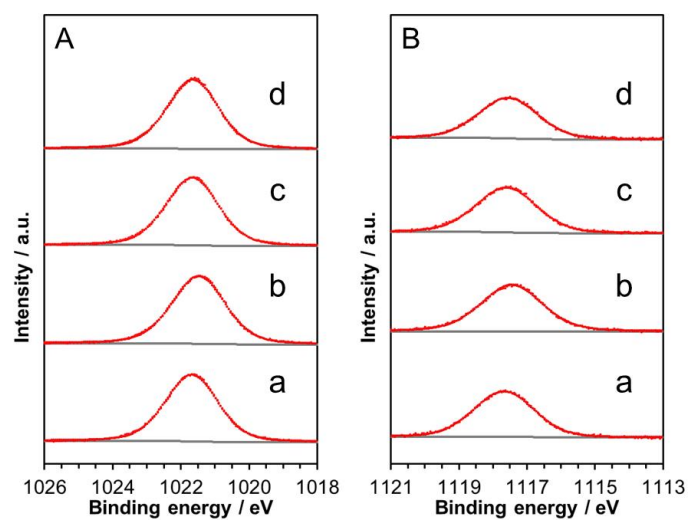

**Figure S5.** (A) Ga2*p* and (B) Zn2*p* XPS spectra for GaN:ZnO synthesized at (a) 1073, (b) 1123, (c) 1173, and (d) 1223 K, respectively.

**Table S1.** The surface atomic ratio of GaN:ZnO( $\delta$ ) prepared different temperatures estimated by XPS.

| Synthesis Temperature / K | Zn/Ga molar ratio / - |
|---------------------------|-----------------------|
| 1223                      | 2.8                   |
| 1173                      | 2.0                   |
| 1123                      | 1.9                   |
| 1073                      | 1.9                   |

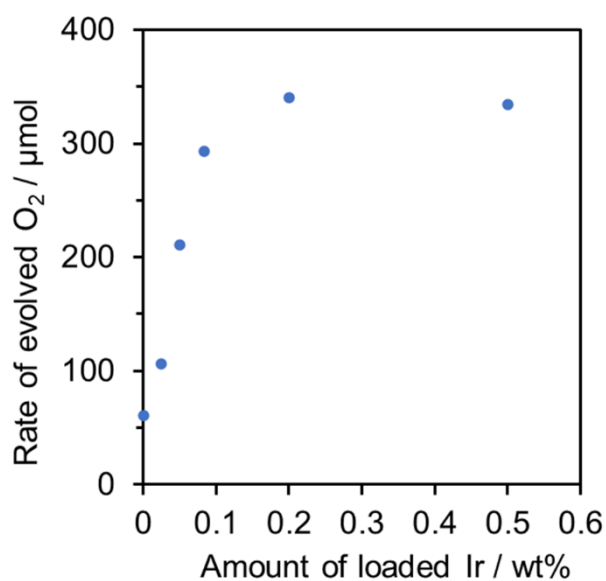

**Figure S6.** Dependence of oxygen evolution activity for GaN:ZnO( $\delta$ ) synthesized at 1173 K on loading amount of IrO<sub>x</sub> (Ir). The reactions were carried out in an aqueous AgNO<sub>3</sub> solution (30 mM) under visible light irradiation ( $\lambda > 420$  nm) from a 300-W Xe lamp.

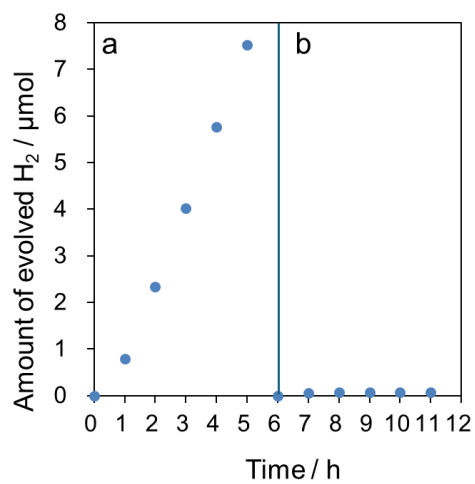

**Figure S7.** Time course of hydrogen evolution from aqueous solution containing (a) 10 mM ascorbic acid and (b) 10 vol% methanol using Rh/IrO<sub>x</sub>-loaded GaN:ZnO. Reactions were performed under visible light irradiation ( $\lambda > 420$  nm).

**Table S2.** Composition, bandgap energy, and oxygen evolution activity of GaN:ZnO.

| Ref       | ZnO / mol% | Band gap / eV | AQY of oxygen evolution reaction | Electron acceptor | Cocatalyst       |
|-----------|------------|---------------|----------------------------------|-------------------|------------------|
| S1        | 13         | 2.7           | Active <sup>a</sup>              | AgNO <sub>3</sub> | RuO <sub>2</sub> |
| S2        | 17         | 2.7           | Active <sup>a</sup>              | AgNO <sub>3</sub> | None             |
| S3        | 42         | 2.4           | -                                | -                 | -                |
| S4        | 49         | 2.3           | -                                | -                 | -                |
| 13        | 49         | 2.3           | 14.3% at 420 nm                  | AgNO <sub>3</sub> | IrO <sub>2</sub> |
| S5        | 49         | 2.5           | -                                | -                 | -                |
| S6        | 51         | 2.2           | -                                | -                 | -                |
| 17        | 55         | 2.3           | Active <sup>a</sup>              | AgNO <sub>3</sub> | None             |
| 17        | 58         | 2.1           | -                                | -                 | -                |
| 13        | -          | 2.0           | Active <sup>a</sup>              | AgNO <sub>3</sub> | IrO <sub>2</sub> |
| This work | 65         | 2.1           | 11.9% at 420 nm                  | AgNO <sub>3</sub> | IrO <sub>x</sub> |
| S7        | 63         | 2.0           | -                                | -                 | -                |
| S8        | 73         | 2.2           | -                                | -                 | -                |
| 24        | 79         | 2.2           | -                                | -                 | -                |
| S9        | 81         | 2.4           | -                                | -                 | -                |
| S10       | 85         | 2,4           | -                                | -                 | -                |
| S11       | 90         | 2.8           | -                                | -                 | -                |
| 11        | 90         | 2.1           | -                                | -                 | -                |

<sup>a</sup> Capable of evolving O<sub>2</sub> but the AQY was not measured.

- indicates no data.

### Supplementary Reference

- S1. K. Maeda, K. Teramura, H. Masuda, T. Takata, N. Saito, Y. Inoue, K. Domen, Efficient Overall Water Splitting under Visible-Light Irradiation on (Ga<sub>1-x</sub>Zn<sub>x</sub>)(N<sub>1-x</sub>O<sub>x</sub>) Dispersed with Rh–Cr Mixed-Oxide Nanoparticles: Effect of Reaction Conditions on Photocatalytic Activity, *J. Phys. Chem. B*, 2006, **110**, 13107-13112.
- S2. K. Maeda, H. Hashiguchi H. Masuda, R. Abe, K. Domen, Photocatalytic Activity of (Ga<sub>1-x</sub>Zn<sub>x</sub>)(N<sub>1-x</sub>O<sub>x</sub>) for Visible-Light-Driven H<sub>2</sub> and O<sub>2</sub> Evolution in the Presence of Sacrificial Reagents, *J. Phys. Chem. C*, 2008, **112**, 3447-3452.
- S3. K. Maeda. K. Domen, New Non-Oxide Photocatalysts Designed for Overall Water Splitting under Visible Light, *J. Phys. Chem, C*, 2007, **111**, 7851-7861.



- S4. K. Katagiri, Y. Hayashi, R. Yoshiyuki, K. Inumaru, T. Uchiyama, N. Nagata, Y. Uchimoto, A. Miyoshi, K. Maeda, Mechanistic Insight on the Formation of GaN:ZnO Solid Solution from Zn-Ga Layered Double Hydroxide Using Urea as the Nitriding Agent, *Inorg. Chem.*, 2018, **57**, 13953-13962.
- S5. H. Chen, L. Wang, J. C. Hanson, J. T. Muckerman, E. Fujita, J. A. Rodriguez, In Situ XRD Studies of ZnO/GaN Mixtures at High Pressure and High Temperature: Synthesis of Zn-Rich  $(\text{Ga}_{1-x}\text{Zn}_x)(\text{N}_{1-x}\text{O}_x)$  Photocatalysts, *J. Phys. Chem. C*, 2010, **114**, 1809-1814.
- S6. M. Feyngenson, J. C. Neufeind, T. A. Tyson, N. Schieber, W. Q. Han, Average and Local Crystal Structures of  $(\text{Ga}_{1-x}\text{Zn}_x)(\text{N}_{1-x}\text{O}_x)$  Solid Solution Nanoparticles, *Inorg. Chem.*, 2015, **54**, 11226-11235.
- S7. M. Kraut, E. Sirotti, F. Pantle, C. M. Jiang, G. Grötzner, M. Koch, L. I. Wagner, L. D. Sharp, M. Stutzmann, Control of Band Gap and Band Edge Positions in Gallium-Zinc Oxynitride Grown by Molecular Beam Epitaxy, *J. Phys. Chem. C*, 2020, **124**, 7668-7676.
- S8. A. Miyoshi, S. Yasuda, T. Kanazawa, R. Haruki, K. Yanagisawa, Y. Tang, R. Mizuochi, T. Yokoi, S. Nozawa, K. Kimoto, K. Maeda, Fluorine-Assisted Low-Temperature Synthesis of GaN:ZnO-Related Solid Solutions with Visible-Light Photoresponse, *ACS Appl. Mater. Interfaces*, 2022, **14**, 19756-19765.
- S9. J. Wang, B. Huang, Z. Wang, P. Wang, H. Cheng, Z. Zheng, X. Qin, X. Zhang, Y. Dai, M. H. Whangbo, Facile synthesis of Zn-rich  $(\text{GaN})_{1-x}(\text{ZnO})_x$  solid solutions using layered double hydroxides as precursors, *J. Mater. Chem.*, 2011, **21**, 4562-4567.
- S10. A. Wu, J. Li, B. Liu, W. Yang, Y. Jiang, L. Liu, X. Zhang, C. Xiong, X. Jiang, Band-gap tailoring and visible-light-driven photocatalytic performance of porous  $(\text{GaN})_{1-x}(\text{ZnO})_x$  solid solution, *Dalton Trans.*, 2017, **46**, 2643-2652.
- S11. H. A. N. Dharmagunawardhane, A. James, Q. Wu, W. R. Woerner, R. M. Palomino, A. Sinclair, A. Orlov, J. B. Parise, Unexpected visible light driven photocatalytic activity without cocatalysts and sacrificial reagents from a  $(\text{GaN})_{1-x}(\text{ZnO})_x$  solid solution synthesized at high pressure over the entire composition range, *RSC Adv.*, 2018, **8**, 8976-8982.
